# Supplementary material for: Unraveling 1,4-Butanediol Metabolism in Pseudomonas putida KT2440
Source: Front Microbiol. 2020 Mar 17;11:382. doi: 10.3389/fmicb.2020.00382 (PMC7090098; doi:10.3389/fmicb.2020.00382)
Supplement: Supplementary file 2 [file Data_Sheet_2.xlsx]

## Sheet: Description
Supplemental data file to DOI: 10.3389/fmicb.2020.00382
Unraveling 1,4-butanediol metabolism in Pseudomonas putida KT2440
Wing-Jin Li1, Tanja Narancic2,3, Shane T. Kenny4, Kevin O’Connor2,3, Lars M. Blank1, Nick Wierckx1,5*
1 Institute of Applied Microbiology-iAMB, Aachen Biology and Biotechnology-ABBt, RWTH Aachen University, Aachen, Germany
2 UCD Earth Institute and School of Biomolecular and Biomedical Science, University College Dublin, Belfield, Dublin 4, Ireland
3 BEACON – SFI Bioeconomy Research Centre, University College Dublin, Belfield, Dublin 4, Ireland
4 Bioplastech Ltd., NovaUCD, Belfield Innovation Park, University College Dublin, Belfield, Dublin 4, Ireland
5 Institute of Bio- and Geosciences IBG-1: Biotechnology, Forschungszentrum Jülich, 52425 Jülich, Germany
* Correspondence:
n.wierckx@fz-juelich.de
Proteome analysis of P. putida KT2440 and strains B10.1 and B01.2 evolved on 1,4-butanediol.
Strains were cultured in mineral medium with glucose or 1,4-butanediol and mid-log phase samples were harvested for proteome analysis. See data sheet 1, figure S2 for sampling points.
Values indicate Label Free Quantification, (LFQ), representing the sum of the ion signal recorded in the mass spectrometer for all peptides derived from each protein of the corresponding proteins

## Sheet: RAW AVG LFQ
UNIPROT ID	wt_BDO	B10.1_BDO	B10.2_BDO	wt_GLU	B10.1_GLU	B10.2_GLU	Locus tag	annotation
Q88P68	13448700000	14264000000	14845666667	13792666667	9476466667	11535666667	NA (deleted on May 11 2016)	Cold-shock domain family protein			cell highlight rules
P0A151	5.45377e+08	8.45943e+08	5.57623e+08	7.60753e+08	1043173333	6.87117e+08	PP_0001	Probable chromosome-partitioning protein ParB		smaller than	0	900000
P0A149	42890000	1.15137e+08	2.94283e+07	1.42137e+08	1.93633e+08	78550000	PP_0002	Uncharacterized protein PP_0002		between	1000000	1100000
P0A124	6.69893e+07	1.42483e+08	112167000	211330000	266400000	1.56847e+08	PP_0003	Ribosomal RNA small subunit methyltransferase G		between	100000000	110000000
Q88RW8	340980000	6.35537e+08	6.04757e+08	910020000	1252500000	793720000	PP_0004	tRNA uridine 5-carboxymethylaminomethyl modification enzyme MnmG		between	1000000000	1100000000
P0A175	4.08337e+08	3.49777e+08	2.73837e+08	433640000	488220000	3.78913e+08	PP_0005	tRNA modification GTPase MnmE		greater than	10000000000	11000000000
P0A140	3.93433e+08	466230000	653190000	1010680000	741820000	1021036667	PP_0006	Membrane protein insertase YidC
P0A167	0	0	0	0	9618000	0	PP_0008	Ribonuclease P protein component
P0A161	1.99563e+08	2.09373e+08	1.72197e+08	3.12067e+08	3.43163e+08	3.04007e+08	PP_0009	50S ribosomal protein L34
P0A116	4.72623e+08	412940000	399200000	6.26403e+08	6.39977e+08	6.31133e+08	PP_0010	Chromosomal replication initiator protein DnaA
P0A120	1927366667	1621133333	1806900000	1725333333	1846233333	1722100000	PP_0011	DNA polymerase III subunit beta
Q88RW6	1337633333	1140900000	1826766667	3083933333	1947066667	2777333333	PP_0013	DNA gyrase subunit B
Q88RW2	1.50847e+08	8.49077e+07	1.00552e+08	1.65433e+07	7.39503e+07	4.74683e+07	PP_0017	Transcriptional regulator MvaT, P16 subunit, putative
Q88RW1	9.04943e+08	6.80523e+08	7.62593e+08	5.33967e+08	5.61257e+08	678810000	PP_0018	Uncharacterized protein
Q88RW0	3.35333e+07	78244000	4.44233e+07	75850000	24394000	20554000	PP_0019	Uncharacterized protein
Q88RV9	1.01629e+08	8.76543e+07	85301000	7.91393e+07	8.90133e+07	7.24473e+07	PP_0020	Uncharacterized protein
Q88RV6	4.47097e+07	1.51994e+08	8.09177e+07	5018200	6.37667e+06	14671000	PP_0023	Uncharacterized protein
Q88RV0	1.19726e+08	5.58653e+07	84525000	63026000	5.28197e+07	46476000	PP_0029	DNA-binding response regulator CzrR
Q88RU9	1.85627e+08	9.10097e+07	8.33317e+07	5.51297e+07	63389000	6.51537e+07	PP_0030	Sensor histidine kinase
Q88RS8	0	0	8012000	0	0	0	PP_0051	Sigma-54 dependent transcriptional regulator
Q88RS6	5445000	0	0	0	0	0	PP_0053	Uncharacterized protein
Q88RS3	4072000000	1309733333	4.83437e+08	41195000	2.53097e+07	21929000	PP_0056	Oxidoreductase, GMC family
Q88RS2	2141000000	1961733333	5.46437e+08	13139000	5.60597e+06	2032900	PP_0057	Major facilitator family transporter
Q88RS1	0	0	0	0	0	1.62743e+07	PP_0058	1-acyl-sn-glycerol-3-phosphate acyltransferase, putative
Q88RS0	0	0	0	0	0	3.29033e+07	PP_0059	D-glycero-beta-D-manno-heptose-1,7-bisphosphate 7-phosphatase
Q88RR9	1213133333	1140533333	1316000000	2079566667	1403900000	1608900000	PP_0060	Glycine--tRNA ligase beta subunit
Q88RR8	8.08047e+08	6.74703e+08	839950000	1429533333	1200833333	1269666667	PP_0061	Glycine--tRNA ligase alpha subunit
Q88RR7	0	0	0	0	0	9852000	PP_0062	DNA-3-methyladenine glycosidase I
Q88RR6	167410000	1.55973e+08	1.33077e+08	170270000	180510000	1.69457e+08	PP_0063	Lipid A biosynthesis lauroyl acyltransferase, putative
Q88RR5	1.39537e+07	0	0	0	0	0	PP_0064	TPR domain protein
Q88RR4	311410000	2.49783e+08	2.14143e+08	268970000	363060000	2.86373e+08	PP_0065	Potassium uptake protein TrkA
Q88RR3	3.71983e+07	45286000	4.08873e+07	6.67127e+07	9.93727e+07	62256000	PP_0066	Ribosomal RNA small subunit methyltransferase B
Q88RR2	1.92277e+08	208490000	1.87887e+08	3.78267e+08	3.64517e+08	269270000	PP_0067	Methionyl-tRNA formyltransferase
Q88RR1	19579000	2.30433e+07	6.71527e+07	101723000	0	2.41083e+07	PP_0068	Peptide deformylase 1
Q88RQ9	97806000	9.91377e+07	2.52223e+07	42660000	7.13607e+07	5.76213e+07	PP_0070	Threonylcarbamoyl-AMP synthase
Q88RQ7	1846466667	2490033333	1083730000	678360000	1508700000	6.93953e+08	PP_0072	Quinone oxidoreductase
Q88RQ6	7.06657e+07	8.14337e+07	8.87083e+07	151240000	1.21223e+08	1.47603e+08	PP_0073	Oxygen-dependent coproporphyrinogen-III oxidase
Q88RQ5	222890000	1.52053e+08	1.85707e+08	1.38691e+08	239400000	210090000	PP_0074	Shikimate dehydrogenase (NADP(+))
Q88RP7	1681900000	1038800000	1440233333	3834333333	4054966667	3533466667	PP_0082	Tryptophan synthase alpha chain
Q88RP6	2134833333	1492300000	2138800000	6277633333	6817533333	5693866667	PP_0083	Tryptophan synthase beta chain
Q88RP4	1.56699e+08	46468000	6.49357e+08	5.76667e+07	4.81147e+07	6.15173e+07	PP_0085	Uncharacterized protein
Q88RP2	568750000	1274866667	523270000	162340000	496570000	1.8436e+08	PP_0087	Uncharacterized protein
Q88RP1	6.43157e+07	1.19742e+08	7.32177e+07	109779000	6.44117e+07	8.20063e+07	PP_0088	Uncharacterized protein
Q88RP0	1.14152e+08	27535000	4.12993e+08	6.87133e+07	9.95687e+07	29488000	PP_0089	Osmotically inducible protein OsmC
Q88RN5	0	0	0	0	4.85933e+06	0	PP_0094	Hydrolase, haloacid dehalogenase-like family
Q88RN3	1597333333	1463233333	1710000000	1642100000	1568766667	1450033333	PP_0096	Oligopeptidase A
Q88RN2	0	0	0	0	0	1.81623e+07	PP_0097	Uncharacterized protein
Q88RM9	3111800000	2481333333	3791233333	3312400000	1617800000	3226700000	PP_0100	Carbonic anhydrase
Q88RM8	0	0	0	0	0	874500	PP_0101	Sulfate transporter, putative
Q88RM6	5.66597e+08	5.45297e+07	1.68797e+08	3.93997e+07	4.10523e+07	5.69707e+07	PP_0103	Cytochrome c oxidase subunit 2
Q88RM1	2.06247e+07	0	0	0	0	0	PP_0108	Uncharacterized protein
Q88RL8	245050000	159390000	1.40803e+08	1.49827e+08	1.77973e+08	1.31637e+08	PP_0111	Sco1/SenC family protein
Q88RL7	1.82497e+08	2.09533e+08	2.33553e+08	1.98693e+08	1.83987e+08	1.32477e+08	PP_0112	ABC transporter, periplasmic binding protein, putative
Q88RL5	0	5.39467e+07	2.52677e+08	0	0	0	PP_0114	Methionine import ATP-binding protein MetN 1
Q88RL4	0	0	0	0	255210000	1.83907e+08	PP_0115	Catalase
Q88RL3	931840000	652030000	572840000	5.92257e+08	532030000	493980000	PP_0116	Lipoprotein, putative
Q88RK8	191870000	207730000	2.13023e+08	3.92747e+08	4.38637e+08	3.48147e+08	PP_0121	Homoserine kinase
Q88RK7	4.63407e+08	248040000	2.81737e+08	270040000	2.21097e+08	2.47783e+08	PP_0122	Uncharacterized protein
Q88RK6	4.52143e+08	445290000	3.59493e+08	4.64417e+08	4.77053e+08	4.47067e+08	PP_0123	DNA polymerase I
Q88RK5	315880000	643590000	3.49047e+08	4.35317e+08	6.32177e+08	3.62713e+08	PP_0124	Probable GTP-binding protein EngB
Q88RK3	0	0	23157000	31065000	0	0	PP_0126	Cytochrome c4
Q88RK2	5.25333e+08	4.52577e+08	664370000	445740000	472780000	5.94947e+08	PP_0127	Thiol:disulfide interchange protein
Q88RJ7	0	0	0	7.78333e+06	0	0	PP_0132	Sensory box histidine kinase
Q88RJ6	209540000	2.39983e+08	2.81993e+08	2.07257e+08	2.16327e+08	1.74183e+08	PP_0133	Alginate biosynthesis transcriptional regulatory protein AlgB
Q88RJ2	0	0	0	0	9911000	0	PP_0137	Proton/sodium-glutamate/aspartate symporter
Q88RJ0	3.11013e+08	82720000	7.32933e+07	0	0	4.03333e+07	PP_0139	Lipoprotein, putative
Q88RI9	3.28793e+07	0	0	0	0	0	PP_0140	Uncharacterized protein
Q88RI8	6.54737e+07	41544000	37569000	3.88143e+07	22840000	3.20327e+07	PP_0141	ABC transporter, ATP-binding protein, putative
Q88RI4	0	0	0	0	4.65233e+06	0	PP_0145	Na+/Pi cotransporter family protein
Q88RH5	1.26037e+07	2.72953e+07	2.90237e+07	247833000	90132000	3.81807e+08	PP_0154	Acetyl-CoA hydrolase/transferase family protein
Q88RH4	1.45237e+07	42633000	1.39197e+07	5.18863e+07	48277000	0	PP_0155	NAD(P) transhydrogenase subunit beta
Q88RH2	1.72777e+08	1.75977e+08	93060000	57063000	5.72057e+07	4.53693e+07	PP_0158	Glutaryl-CoA dehydrogenase
Q88RH1	0	7356000	0	0	0	0	PP_0159	CAIB/BAIF family protein
Q88RG7	0	0	0	0	1.41227e+07	0	PP_0163	Transcriptional regulator, GntR family
Q88RG5	1.79983e+08	1.50127e+08	9.35843e+07	1.28607e+08	104336000	1.0331e+08	PP_0165	GGDEF domain protein
Q88RG4	4.16943e+08	5.77453e+08	4.00313e+08	5.04657e+08	819510000	3.85487e+08	PP_0166	HlyD family secretion protein
Q88RG3	337900000	4.13253e+08	2.70797e+08	3.98217e+08	554990000	2.58723e+08	PP_0167	Toxin secretion ATP-binding protein
Q88RG2	3453400000	7082700000	2195466667	2696700000	5552366667	1683100000	PP_0168	Surface adhesion protein, putative
Q88RF7	1.67473e+08	1.69237e+08	1.27337e+08	1.87963e+08	128390000	1.87367e+08	PP_0173	Transcriptional factor-related protein
Q88RE9	4.20787e+08	3.63013e+08	438200000	2.52943e+08	1.95643e+08	2.53103e+08	PP_0181	Uncharacterized protein
Q88RE7	4.60853e+08	6.69843e+08	263490000	2.73673e+08	2.98193e+08	1.96547e+08	PP_0183	Glutathione S-transferase family protein
P59618	1909000000	2018600000	1848200000	2842466667	2581833333	2664700000	PP_0184	Argininosuccinate lyase
Q88RE6	1103096667	6.76437e+08	888940000	3.28163e+08	2.79663e+08	3.39363e+08	PP_0185	Alginate biosynthesis protein PprA
Q88RE5	9.30497e+07	1.27753e+08	114090000	1.27063e+08	1.28867e+08	1.23293e+08	PP_0186	Porphobilinogen deaminase
Q88RE4	0	0	0	0	3570000	0	PP_0187	Uroporphyrinogen-III synthetase
Q88RE3	8.68317e+08	1022733333	7.51443e+08	7.99227e+08	7.07257e+08	5.91247e+08	PP_0188	Uroporphyrin-III C-methyltransferase, putative
Q88RE2	6.36737e+08	807390000	5.62577e+08	5.26453e+08	5.21843e+08	410810000	PP_0189	HemY protein
Q88RE1	8.92303e+07	5.92617e+07	63213000	3.26617e+07	24973000	2.22807e+07	PP_0191	Transcriptional regulator PfrA
Q88RE0	0	0	5.35533e+06	0	0	0	PP_0192	Peptidyl-prolyl cis-trans isomerase
Q88RD8	2287866667	1343193333	2662856667	166870000	581630000	7.56177e+08	PP_0194	Alginate regulatory protein AlgP
Q88RD6	6.09133e+07	6.14863e+07	5.93807e+07	1.25077e+08	1.11167e+08	9.70987e+07	PP_0196	ABC transporter, ATP-binding protein, putative
Q88RD0	9.04077e+08	4.11233e+08	4.81277e+08	2.17103e+08	2.35073e+08	2.90283e+08	PP_0202	CBS domain protein
Q88RC9	1.97133e+08	3.56177e+08	3.41493e+08	1.81807e+08	32381000	279510000	PP_0203	Tabtoxinine-beta-lactam limiting dipeptidase, putative
Q88RC0	8656166667	8942066667	8912000000	2988666667	3679833333	3400200000	PP_0213	Glutarate-semialdehyde dehydrogenase DavD
Q88RB9	29700000000	18218333333	26017000000	4229033333	5988266667	4772333333	PP_0214	5-aminovalerate aminotransferase DavT
Q88RB8	87339000	3.97703e+07	3.98887e+07	3.94517e+07	2.01567e+07	35818000	PP_0215	Response regulator
Q88RB7	0	0	0	0	0	2.53917e+06	PP_0216	Sensory box protein
Q88RA8	7.78443e+07	1.53913e+08	9.69367e+07	82316000	1.04274e+08	8.35967e+07	PP_0225	Cysteine ABC transporter, ATP-binding protein, putative
Q88RA6	2629233333	4151866667	2397800000	1412500000	2067633333	1530066667	PP_0227	Cysteine ABC transporter, periplasmic cysteine-binding protein, putative
Q88RA5	6.58017e+07	8.65923e+07	60879000	61547000	80489000	6.18283e+07	PP_0228	Serine acetyltransferase
Q88R98	866990000	6.55223e+08	6.67447e+08	3.37313e+08	1.72503e+08	2.92743e+08	PP_0235	Antioxidant protein LsfA
Q88R94	1.15405e+08	4.46667e+07	8.90567e+07	0	5.02333e+07	0	PP_0239	Sulfonate ABC transporter, permease protein SsuC
Q88R91	0	0	0	0	0	1.03983e+07	PP_0242	Transcriptional regulator, TetR family
Q88R90	1.25337e+08	2.21287e+08	2.21607e+08	281230000	2.22063e+08	2.51927e+08	PP_0243	Glutamate--cysteine ligase
Q88R88	3.89833e+08	642710000	7.24287e+08	1076023333	1337900000	1017596667	PP_0245	S1 RNA binding domain protein
Q88R87	897490000	9.01013e+08	6.30303e+08	284380000	4.41527e+08	366000000	PP_0246	DNA-binding response regulator OmpR
Q88R86	4.64613e+07	6.31977e+07	2.05663e+07	1.58387e+07	3.22337e+07	2.57517e+07	PP_0247	Osmolarity sensor protein EnvZ
Q88R85	5.78927e+07	1.18739e+08	43353000	16845000	1.12077e+07	1.16387e+07	PP_0248	Probable alpha-L-glutamate ligase
Q88R83	2.80097e+07	3.56993e+07	31888000	1.34157e+07	32569000	2.27313e+07	PP_0250	Heat shock protein 15
Q88R81	8.84577e+08	985260000	1011930000	1187690000	1535366667	1237133333	PP_0252	33 kDa chaperonin
Q88R76	2362000000	1542033333	1727266667	8.69353e+08	4.69423e+08	7.11477e+08	PP_0258	LysM domain protein
Q88R74	108223000	1.42483e+08	8.92567e+07	1.23632e+08	1.22213e+08	1.33433e+08	PP_0260	ADP compound hydrolase
Q88R73	0	0	0	2.26537e+07	0	0	PP_0261	3'(2'),5'-bisphosphate nucleotidase
Q88R72	0	0	0	0	0	17864000	PP_0262	Uncharacterized protein
Q88R71	6.85077e+07	2.64717e+07	2.39823e+07	39450000	0	1.26797e+07	PP_0263	Sigma-54 dependent response regulator
Q88R69	13367000	0	0	0	0	0	PP_0265	dTDP-4-dehydrorhamnose 3,5-epimerase family protein
Q88R68	2.79837e+08	2.52173e+08	308960000	68830000	98632000	9.37433e+07	PP_0266	Agmatine deiminase
Q88R66	0	16991000	0	4.58143e+07	83546000	4.02133e+07	PP_0268	Outer membrane protein OprE3
Q88R52	3726033333	5751966667	2697800000	2841566667	4487300000	2440366667	PP_0282	Amino acid ABC transporter, periplasmic amino acid-binding protein
Q88R51	3.44767e+08	734410000	2.53783e+08	3.69053e+08	881600000	3.36193e+08	PP_0283	Amino acid ABC transporter, ATP-binding protein
Q88R49	246710000	8.65747e+08	3.79777e+08	5.36583e+08	773630000	5.09997e+08	PP_0285	Probable Fe(2+)-trafficking protein
Q88R48	0	0	0	0	5.58233e+06	0	PP_0286	A/G specific adenine glycosylase
Q88R47	3.68853e+08	503870000	3.93787e+08	615410000	526500000	570750000	PP_0287	Uncharacterized protein
Q88R46	5.84757e+08	1613266667	4.76493e+08	589610000	6.07297e+08	4.23653e+08	PP_0288	Oxalate/formate antiporter, putative
Q88R45	5.87453e+07	18800000	0	9568000	0	2.98153e+07	PP_0289	Imidazoleglycerol-phosphate dehydratase
Q88R44	3.06233e+08	3.10653e+08	2.70257e+08	3.14387e+08	315060000	3.00697e+08	PP_0290	Imidazole glycerol phosphate synthase subunit HisH
Q88R42	1322233333	2183466667	1795833333	3742366667	3343466667	3237600000	PP_0292	1-(5-phosphoribosyl)-5-[(5-phosphoribosylamino)methylideneamino] imidazole-4-carboxamide isomerase
Q88R41	2.11553e+08	311980000	3.10157e+08	5.07167e+08	3.93047e+08	449260000	PP_0293	Imidazole glycerol phosphate synthase subunit HisF
Q88R40	325040000	527480000	1.37217e+08	53228000	47734000	5.15747e+07	PP_0294	Glycine betaine/L-proline ABC transporter, ATP-binding subunit
Q88R38	1449833333	1576366667	8.60223e+08	3.53913e+08	301970000	3.67177e+08	PP_0296	Glycine betaine/L-proline ABC transporter, periplasmic binding protein
Q88R35	344060000	321690000	2.11273e+08	2.05987e+08	1.63647e+08	2.10257e+08	PP_0299	Uncharacterized protein
Q88R27	5.24177e+07	6.56447e+07	58379000	74626000	6.59817e+07	59905000	PP_0307	Uncharacterized protein
Q88R26	418810000	7.21737e+07	4.53947e+07	41262000	3.35577e+07	34777000	PP_0308	Dipeptidase, putative
Q88R22	1.13977e+08	1.58762e+08	1.53683e+08	166190000	1.19977e+08	2.33487e+08	PP_0312	Electron transfer flavoprotein, alpha subunit
Q88R18	0	0	6.07467e+06	0	0	0	PP_0316	Oxidoreductase, FAD-binding, putative
Q88R17	0	0	0	4.04667e+06	0	0	PP_0317	Methyl-accepting chemotaxis transducer
Q88R16	0	0	71971000	1.16373e+08	1.61043e+08	2.25403e+08	PP_0318	Uncharacterized protein
Q88R15	0	0	0	6.95967e+06	0	0	PP_0319	Cell division protein ZapA
Q88R13	135810000	1.87877e+08	1.90203e+08	210270000	1.40207e+08	0	PP_0321	L-threonine aldolase
Q88R12	1.79133e+08	85963000	5.36737e+07	6.75273e+07	76782000	6.72387e+07	PP_0322	Serine hydroxymethyltransferase 1
Q88R11	6.85307e+07	3.54343e+07	24615000	2.52963e+07	25738000	25353000	PP_0323	Sarcosine oxidase, beta subunit
Q88R10	0	0	0	0	0	17065000	PP_0324	Sarcosine oxidase, delta subunit
Q88R09	9.06657e+07	9.65467e+07	6.96083e+07	234190000	2.50843e+08	151400000	PP_0325	Sarcosine oxidase, alpha subunit
Q88R07	0	2.61187e+07	0	0	0	0	PP_0327	Formyltetrahydrofolate deformylase
Q88R06	5.22593e+08	2.82447e+08	1.49543e+08	8.95867e+07	4.43003e+07	139750000	PP_0328	Isocitrate dehydrogenase, NADP-dependent, monomeric-type
Q88R04	0	0	0	0	0	15567000	PP_0330	Uncharacterized protein
Q88R01	128396000	2.24717e+08	2.61597e+08	1.04055e+08	67027000	1.25377e+08	PP_0333	Uncharacterized protein
Q88QZ9	2.59547e+08	374340000	2.72237e+08	3.99353e+08	2.58847e+08	2.78403e+08	PP_0335	Glutathione S-transferase family protein
Q88QZ8	706740000	8.45547e+08	729120000	8.92803e+08	5.42943e+08	816950000	PP_0336	Peptide methionine sulfoxide reductase MsrA
Q88QZ6	8.68443e+08	1095900000	1112250000	3075933333	2035933333	2538033333	PP_0338	Acetyltransferase component of pyruvate dehydrogenase complex
Q88QZ5	6914400000	6517133333	7175233333	17876333333	14629666667	16502000000	PP_0339	Pyruvate dehydrogenase E1 component
Q88QZ4	4.79967e+08	5.86687e+08	2.95917e+08	3.37317e+08	562930000	2.92087e+08	PP_0340	Glutamate-ammonia-ligase adenylyltransferase
Q88QZ3	5.29773e+07	57790000	5.27883e+07	8.70217e+07	78512000	3.64843e+07	PP_0341	Heptosyltransferase II
Q88QY8	98079000	1.06557e+08	9.74773e+07	109099000	95841000	1.10225e+08	PP_0346	Heptose kinase WapQ, putative
Q88QY7	6.40607e+07	99331000	5.24977e+07	89966000	9.34333e+07	5.10773e+07	PP_0347	Uncharacterized protein
Q88QY0	0	0	0	0	0	2997000	PP_0354	CBS domain protein
Q88QX9	0	0	1.22793e+07	0	0	0	PP_0355	Response regulator
Q88QX8	16065333333	7769700000	11051333333	2729433333	3725000000	2622833333	PP_0356	Malate synthase G
Q88QX7	3.16213e+08	6.38137e+07	9.54127e+07	2.37427e+07	0	2.84523e+07	PP_0357	ACT domain protein
Q88QX5	0	0	0	1031000	0	0	PP_0359	Stress response kinase A
Q88QX4	0	4.31767e+06	0	0	0	0	PP_0360	Molybdate transport regulator
Q88QX2	1.31211e+08	4.32233e+08	3.02473e+08	1507600000	1651000000	1199706667	PP_0362	Biotin synthase
Q88QX1	0	0	0	0	0	14692000	PP_0363	8-amino-7-oxononanoate synthase
Q88QX0	50988000	0	0	1.26993e+07	0	0	PP_0364	Biotin biosynthesis protein BioH
Q88QW8	5.52513e+08	4.51353e+08	3.00987e+08	251540000	1.83823e+08	199220000	PP_0366	ATP-dependent dethiobiotin synthetase BioD
Q88QW6	1521066667	1611466667	1786033333	1561533333	9.83937e+08	1410433333	PP_0368	Acyl-CoA dehydrogenase, putative
Q88QW4	6.30153e+07	1.89107e+07	1.75373e+07	0	0	0	PP_0370	Acyl-CoA dehydrogenase family protein
Q88QV9	5.85763e+08	6.58907e+08	4.05373e+08	673070000	5.35493e+08	5.62413e+08	PP_0375	Prolyl oligopeptidase family protein
Q88QV8	379800000	371180000	2.56213e+08	3.61017e+08	2.98033e+08	2.96817e+08	PP_0376	Coenzyme PQQ synthesis protein E
Q88QV7	1052280000	1170400000	8.99663e+08	9.56587e+08	980230000	9.08377e+08	PP_0377	Coenzyme PQQ synthesis protein D 1
Q88QV6	3783200000	3391600000	2603133333	3071300000	2121733333	2315466667	PP_0378	Pyrroloquinoline-quinone synthase
Q88QV5	1200700000	9.70997e+08	7.14783e+08	9.51187e+08	7.77087e+08	8.36523e+08	PP_0379	Coenzyme PQQ synthesis protein B
Q88QV2	1.74213e+08	6.77207e+07	83476000	3.37263e+07	3.27033e+07	44476000	PP_0382	Carbon-nitrogen hydrolase family protein
Q88QV1	2.44993e+07	0	0	0	0	0	PP_0383	Tryptophan 2-monooxygenase, putative
Q88QU8	1.27233e+08	2.17713e+07	2.38337e+07	1.83183e+07	15850000	19933000	PP_0386	Sensory box protein
Q88QU7	2805033333	2509633333	2707266667	3594300000	3142033333	3725133333	PP_0387	RNA polymerase sigma factor RpoD
P0A165	5940633333	8689800000	9077166667	10315400000	10751933333	12934666667	PP_0389	30S ribosomal protein S21
Q88QU5	0	0	0	0	0	1787400	PP_0391	Glycerol-3-phosphate acyltransferase
Q88QU2	13643000	0	0	0	0	0	PP_0394	Multifunctional CCA protein
Q88QU1	6.91587e+07	1.09915e+08	7.00903e+07	33910000	25829000	12420000	PP_0395	Uncharacterized protein
P59351	5.11587e+08	3.17427e+08	3.23407e+08	1.33243e+08	1.21043e+08	1.13853e+08	PP_0396	UPF0229 protein PP_0396
Q88QU0	6892266667	4400466667	4237800000	2184700000	2173333333	1956233333	PP_0397	Uncharacterized protein
Q88QT9	2.06273e+07	31009000	0	1.19643e+08	0	89530000	PP_0398	Thiosulfate sulfurtransferase GlpE
Q88QT7	0	1.73857e+07	0	0	0	0	PP_0400	Protein ApaG
Q88QT6	1.21487e+08	7.78397e+07	8.17787e+07	1.38684e+08	102058000	1.99703e+08	PP_0401	Ribosomal RNA small subunit methyltransferase A
Q88QT5	1.59097e+08	1.72267e+08	2.03857e+08	2.20247e+08	1.76193e+08	2.04257e+08	PP_0402	4-hydroxythreonine-4-phosphate dehydrogenase
Q88QT4	2125033333	1575033333	2122966667	3063000000	1970133333	2659433333	PP_0403	Chaperone SurA
Q88QT3	2.60017e+08	3.44467e+08	2.16187e+08	3.65283e+08	457900000	2.86213e+08	PP_0405	Uncharacterized protein
Q88QT2	0	1.33913e+07	0	0	0	0	PP_0406	Nucleotidyltransferase family protein
Q88QT0	95644000	420150000	8.72707e+07	6.58613e+07	4.22733e+07	26304000	PP_0408	Uncharacterized protein
Q88QS8	6.08303e+07	7.99597e+07	3.57693e+07	22388000	5.18063e+07	11345000	PP_0410	DNA-binding response regulator UhpA
Q88QS7	5373033333	555360000	4.24523e+08	116720000	1.56977e+08	1.23097e+08	PP_0411	ABC transporter, ATP-binding protein
Q88QS6	11282066667	1007923333	1117233333	3.26887e+08	2.67107e+08	2.61973e+08	PP_0412	Polyamine ABC transporter, periplasmic polyamine-binding protein
Q88QS5	1471500000	1.76653e+07	20176000	25303300	6519800	1.28401e+07	PP_0413	Polyamine ABC transporter, permease protein
Q88QS4	68380000	0	0	0	0	0	PP_0414	Polyamine ABC transporter, permease protein
Q88QS3	126970000	7.99197e+07	4.95317e+07	1.71747e+08	117492000	1.79833e+08	PP_0415	Ribulose-phosphate 3-epimerase
Q88QS2	0	0	0	0	0	14441000	PP_0416	Phosphoglycolate phosphatase
Q88QS1	1659066667	1954766667	1868700000	2002466667	1986400000	1765233333	PP_0417	Anthranilate synthase, component I
Q88QR8	61023000	28735000	40558000	9.45047e+07	6.48833e+07	7.88897e+07	PP_0420	Anthranilate synthase, component II
Q88QR7	5.68123e+08	527260000	4.82777e+08	319790000	2.83283e+08	404130000	PP_0421	Anthranilate phosphoribosyltransferase
Q88QR6	9.18707e+08	926400000	7.86173e+08	9.05353e+08	6.48647e+08	864440000	PP_0422	Indole-3-glycerol phosphate synthase
Q88QR5	0	0	0	0	0	11162000	PP_0423	Uncharacterized protein
Q88QR4	0	0	1.96377e+08	1.66647e+08	0	1.79037e+08	PP_0424	Catabolite gene activator Crp
Q88QR3	1.20986e+08	111015000	7.10673e+07	7.42247e+07	9.08127e+07	4.57553e+07	PP_0425	Uncharacterized protein
Q88QR1	0	0	0	0	2.40323e+07	0	PP_0427	2-nonaprenyl-3-methyl-6-methoxy-1,4-benzoquinol hydroxylase
Q88QR0	1575533333	2153366667	1805900000	1476333333	1467666667	1517833333	PP_0428	HIT family protein
Q88QQ8	1.62723e+08	1.92547e+08	98495000	73575000	80406000	4.58877e+07	PP_0430	Uncharacterized protein
Q88QQ5	231120000	3.20957e+08	282780000	4.23233e+08	5.12663e+08	3.90843e+08	PP_0433	Iron-sulfur cluster insertion protein ErpA
Q88QQ4	0	0	3.14857e+06	0	0	0	PP_0434	Anhydro-N-acetylmuramic acid kinase
Q88QQ3	0	2.30403e+07	36640000	7.97937e+07	39503000	4.47247e+07	PP_0435	Peptidase, M23/M37 family
Q88QQ2	1251633333	3474100000	1829833333	3327400000	5884200000	3046533333	PP_0436	Tyrosine--tRNA ligase
Q88QP8	1914233333	2300300000	2522666667	3265033333	2547300000	2956633333	PP_0440	Elongation factor Tu-A
Q88QP6	9.76397e+08	1349300000	1464666667	1667533333	1895466667	1806766667	PP_0442	Transcription termination/antitermination protein NusG
Q88QP5	7569466667	11031000000	12504333333	19703333333	23292666667	19709666667	PP_0443	50S ribosomal protein L11
Q88QP4	10276900000	16445333333	17971666667	28750333333	30377666667	32112333333	PP_0444	50S ribosomal protein L1
Q88QP3	9071966667	11846333333	14805333333	20677666667	20683666667	21756333333	PP_0445	50S ribosomal protein L10
P0A157	19055333333	27509333333	29498666667	40771333333	47999333333	42981666667	PP_0446	50S ribosomal protein L7/L12
Q88QP2	19919000000	22441666667	24342000000	30003333333	27718333333	28052666667	PP_0447	DNA-directed RNA polymerase subunit beta
Q88QP1	18241000000	19319000000	21485000000	23690333333	25151000000	23995666667	PP_0448	DNA-directed RNA polymerase subunit beta'
Q88QP0	5311633333	7769100000	8769100000	15320000000	16852333333	14455333333	PP_0449	30S ribosomal protein S12
Q88QN9	12751333333	16496000000	17693666667	32217000000	31980333333	30561000000	PP_0450	30S ribosomal protein S7
Q88QN8	21107666667	34541333333	38579333333	69867000000	63320333333	56441333333	PP_0451	Elongation factor G 1
Q88QN7	57242000000	67902000000	78947666667	89734666667	109333000000	88410333333	PP_0452	Elongation factor Tu-B
Q88QN6	7976400000	11720666667	12892333333	21493000000	20622000000	19909000000	PP_0453	30S ribosomal protein S10
Q88QN5	12532333333	17280000000	19831333333	32956333333	35860333333	32130333333	PP_0454	50S ribosomal protein L3
Q88QN4	5772100000	6941366667	8666766667	10655000000	12824666667	11837666667	PP_0455	50S ribosomal protein L4
Q88QN3	6253333333	7994366667	9399700000	14045000000	14711333333	13767000000	PP_0456	50S ribosomal protein L23
Q88QN2	19941666667	25038666667	30645333333	33195333333	46229000000	44174000000	PP_0457	50S ribosomal protein L2
Q88QN1	3500233333	3189766667	4307900000	3898866667	6248366667	5576000000	PP_0458	30S ribosomal protein S19
Q88QN0	5382866667	6896066667	9269100000	7369533333	12936666667	12266333333	PP_0459	50S ribosomal protein L22
Q88QM9	6885400000	8181466667	9783566667	10588033333	14457333333	13245333333	PP_0460	Prolyl oligopeptidase family protein
Q88QM8	7150800000	10433400000	10443166667	20714666667	21067333333	19027000000	PP_0461	50S ribosomal protein L16
Q88QM7	8004600000	10263666667	11917700000	17507000000	21650666667	16401333333	PP_0462	50S ribosomal protein L29
Q88QM6	7.66983e+08	580480000	915720000	4.44303e+08	1094850000	817970000	PP_0463	30S ribosomal protein S17
Q88QM5	3105833333	4336900000	5073233333	8692633333	8880566667	7689566667	PP_0464	50S ribosomal protein L14
Q88QM4	3084266667	3808400000	4433600000	5560633333	7130900000	6325233333	PP_0465	50S ribosomal protein L24
Q88QM3	15644333333	20378333333	22911666667	37949333333	39373666667	31267333333	PP_0466	50S ribosomal protein L5
Q88QM2	3320000000	3088300000	4550066667	5546833333	6305266667	5300400000	PP_0467	30S ribosomal protein S14
Q88QM1	8304866667	9892300000	12040000000	13147666667	15225666667	15316666667	PP_0468	30S ribosomal protein S8
Q88QM0	7573266667	10018966667	10761000000	19770333333	16309000000	15331666667	PP_0469	50S ribosomal protein L6
Q88QL9	6857533333	9247933333	11059666667	18804000000	15665666667	15066000000	PP_0470	50S ribosomal protein L18
Q88QL8	8224800000	10789333333	11305333333	20821000000	20920000000	19008333333	PP_0471	30S ribosomal protein S5
Q88QL7	4863166667	4837633333	6280100000	7377200000	8335700000	7511533333	PP_0472	50S ribosomal protein L30
Q88QL6	12377666667	19862000000	20410333333	34457666667	36095666667	31795000000	PP_0473	50S ribosomal protein L15
Q88QL5	9.31627e+08	1271390000	1097120000	1847800000	1254120000	1468366667	PP_0474	Protein translocase subunit SecY
P61113	0	0	0	0	0	1.49903e+07	PP_0475	50S ribosomal protein L36
Q88QL3	6130800000	8241866667	10109000000	15103666667	11776000000	13278000000	PP_0476	30S ribosomal protein S13
P59374	5963933333	8670700000	9430333333	17282666667	16094333333	13908666667	PP_0477	30S ribosomal protein S11
Q88QL2	12799666667	17408000000	21338000000	28858666667	30549333333	28856000000	PP_0478	30S ribosomal protein S4
Q88QL1	7664366667	6762833333	7452400000	9088766667	8706400000	7585366667	PP_0479	DNA-directed RNA polymerase subunit alpha
Q88QL0	3822533333	5882033333	6445300000	8871166667	9054333333	9307200000	PP_0480	50S ribosomal protein L17
Q88QK9	0	0	0	0	9447000	0	PP_0481	Catalase
Q88QK8	2.70417e+08	38844000	35304000	3.61873e+07	3.50803e+07	43377000	PP_0482	Ferroxidase
Q88QK7	2.12433e+08	2.26637e+08	2.38413e+08	2.69263e+08	2.54837e+08	2.45213e+08	PP_0483	UvrABC system protein A
Q88QK6	0	0	0	0	0	2.80597e+07	PP_0484	Major facilitator family transporter
Q88QK5	344710000	361040000	4.68777e+08	5.22107e+08	7.15083e+08	6.06573e+08	PP_0485	Single-stranded DNA-binding protein
Q88QK4	20769000	18657000	2.46903e+07	10993000	0	0	PP_0486	Transcriptional regulator, GntR family
Q88QJ9	0	0	0	0	0	5474000	PP_0492	Protein FdhE homolog
Q88QJ8	9.84487e+07	5.90303e+07	1.00685e+08	6.74543e+07	3.04297e+07	59567000	PP_0493	L-seryl-tRNA(Sec) selenium transferase
Q88QJ5	0	0	0	0	0	1.64683e+06	PP_0496	Sodium/alanine symporter
Q88QJ2	152110000	129960000	160940000	1.51307e+08	1.58013e+08	165120000	PP_0500	dTDP-4-rhamnose reductase-related protein
Q88QJ1	0	0	0	0	7.53533e+06	0	PP_0501	NAD-dependent epimerase/dehydratase family protein
Q88QI3	0	0	0	0	4.53167e+06	0	PP_0509	Uncharacterized protein
Q88QI2	540360000	8.37687e+08	6.37097e+08	8.62593e+08	1057090000	680090000	PP_0510	Thioredoxin
Q88QI1	1.47517e+08	1.79847e+08	115400000	1.36717e+08	1.46607e+08	1.16333e+08	PP_0512	Uncharacterized protein
Q88QI0	55897000	9.69457e+07	5.33033e+07	6.54103e+07	54761000	3.06833e+07	PP_0513	Transcriptional repressor NrdR
Q88QH9	2.49733e+07	1.15727e+07	7.22833e+06	0	0	0	PP_0514	Riboflavin biosynthesis protein RibD
Q88QH8	287990000	2.47593e+08	2.56167e+08	1.84927e+08	226320000	1.50933e+08	PP_0515	Riboflavin synthase, alpha subunit
Q88QH7	6.47907e+08	8.20067e+08	6.21363e+08	970470000	1092360000	8.65437e+08	PP_0516	3,4-dihydroxy-2-butanone 4-phosphate synthase
Q88QH6	7.91167e+07	23232000	5.29693e+07	44420000	5.03533e+07	3.64067e+07	PP_0517	6,7-dimethyl-8-ribityllumazine synthase
Q88QH5	2.61113e+08	304560000	2.73477e+08	3.57513e+08	3.45303e+08	3.78173e+08	PP_0518	N utilization substance protein B homolog
Q88QH4	0	0	0	9259000	0	50487000	PP_0519	Thiamine-monophosphate kinase
Q88QH2	9.06933e+06	0	0	0	0	0	PP_0521	Uncharacterized protein
Q88QH1	2.87557e+08	2.93123e+08	3.21207e+08	4.43573e+08	4.13687e+08	4.12233e+08	PP_0522	GTP cyclohydrolase-2
Q88QG7	5.19617e+08	6.01523e+08	497860000	9.21743e+08	9.23113e+08	7.83473e+08	PP_0527	1-deoxy-D-xylulose-5-phosphate synthase
Q88QG6	332360000	6.22193e+08	2.26427e+08	470070000	6.95313e+08	3.97827e+08	PP_0528	Geranyltranstransferase
Q88QG5	1.06118e+08	1.53917e+08	1.32383e+08	1.76567e+08	2.43113e+08	1.43657e+08	PP_0529	Exodeoxyribonuclease 7 small subunit
Q88QF8	0	0	0	0	0	4012000	PP_0536	Uncharacterized protein
Q88QF6	3878300000	4857233333	4312066667	3419566667	4787566667	3786566667	PP_0538	Inorganic pyrophosphatase
Q88QF3	5.28303e+08	4.21317e+08	3.63357e+08	6.92477e+07	1.10258e+08	8.76887e+07	PP_0541	Acetyltransferase, GNAT family
Q88QF2	266520000	2.54863e+08	1.24823e+08	0	0	0	PP_0542	Ethanolamine ammonia-lyase light chain
Q88QF1	3.33783e+08	4.56453e+08	1.22608e+08	45592000	4.65813e+07	3.57763e+07	PP_0543	Ethanolamine ammonia-lyase, heavy subunit
Q88QF0	109130000	1.66737e+08	132150000	0	0	1.18413e+07	PP_0544	Ethanolamine transporter
Q88QE9	3745700000	6764800000	5244233333	1500466667	1264333333	1361733333	PP_0545	Aldehyde dehydrogenase family protein
Q88QE7	3.80337e+08	3.31963e+08	2.94687e+08	3.17933e+08	315760000	290140000	PP_0547	UDP-N-acetylmuramate--L-alanyl-gamma-D-glutamyl-meso-2,6-diaminoheptandioate ligase
Q88QE4	0	0	0	0	0	17540000	PP_0550	Uncharacterized protein
Q88QE2	0	0	0	0	0	5.88733e+06	PP_0552	2,3-butanediol dehydrogenase
Q88QD6	10500333333	9245533333	10375600000	7840300000	7846366667	8989300000	PP_0558	Acetyl-CoA carboxylase, biotin carboxylase
Q88QD5	3364833333	3517133333	3168933333	3614733333	3302833333	3968400000	PP_0559	Acetyl-CoA carboxylase, biotin carboxyl carrier protein
Q88QD1	0	3.10243e+06	0	0	0	0	PP_0563	Response regulator
Q88QD0	1352933333	1831933333	1453066667	1066560000	1425633333	1140933333	PP_0564	Uncharacterized protein
Q88QC8	0	0	0	0	0	1.72963e+07	PP_0566	Translation initiation factor SUI1
Q88QC7	388960000	677060000	3.88787e+08	5.53577e+08	9.66183e+08	4.94617e+08	PP_0567	Biosynthetic arginine decarboxylase
Q88QC4	8.97163e+08	8.32837e+08	809430000	6.13097e+08	2.75937e+08	5.55213e+08	PP_0570	Extracellular protein, putative
Q88QC0	6.08657e+07	58897000	1.36055e+08	18534000	0	0	PP_0574	DNA-binding response regulator, LuxR family
Q88QB8	8.56537e+08	1.44093e+08	184650000	102671000	91215000	8.28437e+07	PP_0576	Lipoprotein, putative
Q88QB6	1.08137e+07	2.36923e+07	0	0	0	0	PP_0578	Methyltransferase, putative
Q88QB3	6.81737e+08	4.60507e+08	2.88483e+08	5.45437e+07	6.87847e+07	6.60133e+07	PP_0581	3-oxoacyl-(Acyl-carrier-protein) reductase
Q88QB2	1.94563e+08	56600000	5.42297e+07	28950000	2.00207e+07	18781000	PP_0582	Thiolase family protein
Q88QB0	1609700000	1335233333	5.31497e+08	1086033333	600060000	9.48947e+08	PP_0584	Methyl-accepting chemotaxis transducer
Q88QA8	155570000	5.94527e+07	5.20163e+07	0	1.38287e+07	1.37757e+07	PP_0586	Heavy metal translocating P-type ATPase
Q88QA7	12648000	7.93833e+07	3.55937e+07	3.71777e+07	20325000	6.50567e+06	PP_0587	Uncharacterized protein
Q88QA6	0	0	0	0	0	7.37633e+06	PP_0588	Copper-binding protein, putative
Q88QA3	2.27813e+08	9.13807e+07	2.40873e+08	1.29749e+08	6.05123e+07	8.34933e+07	PP_0591	Adenine deaminase
Q88QA2	5.09283e+08	3.80553e+08	1.91227e+08	9.19913e+07	143500000	6.75627e+07	PP_0592	Oxidoreductase, short chain dehydrogenase/reductase family
Q88QA0	5.50473e+07	1.06623e+08	5.60727e+07	8.00907e+07	90354000	7.13893e+07	PP_0594	Transcriptional regulator, TetR family
Q88Q99	0	1.69133e+07	0	0	0	0	PP_0595	Transcriptional regulator, LysR family
Q88Q98	0	0	0	0	0	4111000	PP_0596	Beta-alanine--pyruvate transaminase
Q88Q97	834690000	1572633333	8.99013e+08	774590000	1365166667	5.24283e+08	PP_0597	Methylmalonate-semialdehyde dehydrogenase
Q88Q96	2.21373e+08	1.91787e+08	1.74843e+08	2.16303e+08	1.74377e+08	180480000	PP_0599	PqiB family protein
Q88Q95	2618900000	3813433333	3430466667	3861633333	7586333333	5570733333	PP_0600	30S ribosomal protein S20
Q88Q93	227830000	2.30503e+08	1.98123e+08	296380000	246700000	251850000	PP_0602	Riboflavin biosynthesis protein
Q88Q92	1732433333	1891033333	1752733333	3168333333	2970000000	2797966667	PP_0603	Isoleucine--tRNA ligase
Q88Q90	2.34857e+08	301380000	2.57873e+08	4.38693e+08	399690000	392440000	PP_0605	Peptidyl-prolyl cis-trans isomerase
Q88Q89	344820000	462340000	420160000	5.85327e+08	6.30277e+08	599480000	PP_0606	4-hydroxy-3-methylbut-2-enyl diphosphate reductase
Q88Q83	0	0	0	0	0	7675000	PP_0612	Oxidoreductase, FAD-binding
Q88Q81	0	6.50283e+07	1.76923e+07	0	0	0	PP_0614	N-carbamoyl-beta-alanine amidohydrolase, putative
Q88Q76	4.11273e+07	1.90923e+07	0	0	0	0	PP_0619	Branched-chain amino acid ABC transporter, periplasmic amino acid-binding protein
Q88Q74	0	0	0	0	0	8.22467e+06	PP_0621	Uncharacterized protein
Q88Q73	1947500000	1816100000	2017700000	2550000000	2438700000	2361300000	PP_0622	Outer membrane protein assembly factor BamD
Q88Q72	0	0	0	0	7.61167e+06	0	PP_0624	Laccase domain protein
Q88Q71	3211500000	3324833333	2905666667	2713866667	1971966667	2609600000	PP_0625	Chaperone-associated ATPase, putative
Q88Q70	143540000	1.24783e+08	3.34447e+08	1.54437e+08	85284000	1.20497e+08	PP_0626	NADH dehydrogenase
Q88Q65	6.24533e+06	0	0	0	0	0	PP_0631	Dephospho-CoA kinase
Q88Q62	0	0	0	0	0	1.44923e+07	PP_0634	Type IV pili prepilin PilA
Q88Q59	0	0	0	0	0	8864000	PP_0639	Uncharacterized protein
Q88Q58	6.77477e+07	9.23747e+07	1.17767e+08	195620000	1.11763e+08	1.06926e+08	PP_0640	Uncharacterized protein
Q88Q44	1.23757e+08	6.79667e+07	5.70393e+07	51543000	5.90127e+07	5.92087e+07	PP_0654	Probable malate dehydrogenase
Q88Q40	0	0	0	6.80567e+07	0	0	PP_0658	Homocysteine S-methyltransferase family protein
Q88Q27	7133100000	7701733333	8544433333	11858666667	10767300000	11560666667	PP_0671	Serine hydroxymethyltransferase 2
Q88Q25	32371000	6.39683e+07	1.05691e+08	4.17913e+08	608280000	5.97243e+08	PP_0673	Uncharacterized protein
Q88Q24	2313033333	3139400000	3046600000	4615800000	4022866667	3349200000	PP_0674	ABC transporter, ATP-binding protein
Q88Q23	1.15919e+08	1.56607e+08	2.66097e+08	876850000	177810000	256320000	PP_0675	Glutamate dehydrogenase
Q88Q18	1223633333	1392933333	1081833333	1628233333	1653733333	1352733333	PP_0680	ATP-dependent protease, putative
Q88Q14	465920000	1045976667	1021353333	2139366667	1849833333	1890566667	PP_0684	Peptidyl-prolyl cis-trans isomerase
Q88Q12	70638000	137965000	1.86467e+08	334510000	2.76493e+08	2.43923e+08	PP_0686	PhnA protein
Q88Q11	500560000	1172600000	6.67353e+08	1328900000	1080766667	1082833333	PP_0687	Octylprenyl diphosphate synthase
Q88Q10	3605933333	4506900000	4921700000	8245300000	8516400000	7994233333	PP_0688	50S ribosomal protein L21
Q88Q09	2076200000	3500400000	4161533333	6631200000	5429400000	5623300000	PP_0689	50S ribosomal protein L27
Q88Q08	355490000	664140000	5.32653e+08	8.40483e+08	8.77377e+08	7.15447e+08	PP_0690	GTPase Obg
Q88Q07	5.67283e+08	6.66917e+08	658040000	9.43923e+08	808040000	7.52277e+08	PP_0691	Glutamate 5-kinase
Q88Q06	0	0	0	4.42067e+06	0	0	PP_0692	CreA protein
Q88Q05	5.13293e+08	885680000	8.43597e+08	1569666667	1331066667	1414400000	PP_0693	Uncharacterized protein
Q88Q04	85715000	1.43197e+08	155160000	331660000	220610000	2.49717e+08	PP_0694	Uncharacterized protein
Q88Q03	58349000	5.95103e+07	7.61087e+07	6.76683e+07	7.52567e+07	8.91157e+07	PP_0695	Uncharacterized protein
Q88Q01	0	0	1.10283e+07	4.69967e+07	0	52110000	PP_0697	Acetyltransferase, GNAT family
Q88PZ1	9.04437e+07	6.95027e+07	6.03603e+07	7.39577e+07	64138000	8.65777e+07	PP_0707	Membrane protein, putative
Q88PY7	2346033333	501580000	7.54213e+08	1.47593e+08	127796000	1.12805e+08	PP_0711	Hydrolase, isochorismatase family
Q88PY6	125674000	31561000	0	0	0	0	PP_0712	Uncharacterized protein
Q88PX9	1221666667	1986200000	1623400000	2841600000	3134266667	3070166667	PP_0719	Ribosome-binding ATPase YchF
Q88PX8	0	0	0	0	0	3.06917e+07	PP_0720	Peptidyl-tRNA hydrolase
Q88PX7	7027200000	9775933333	12353000000	12336000000	14688000000	15048333333	PP_0721	50S ribosomal protein L25
Q88PX6	6.80243e+08	1020133333	952200000	2803433333	2312133333	2154466667	PP_0722	Ribose-phosphate pyrophosphokinase
Q88PX4	1.15999e+08	6.67127e+07	115619000	8.15373e+07	6.53897e+07	9.12103e+07	PP_0724	Outer-membrane lipoprotein LolB
Q88PX3	5.90307e+08	4.33303e+08	5.28033e+08	486230000	5.04803e+08	5.31317e+08	PP_0725	TPR domain protein
Q88PW6	0	0	0	0	0	2.61763e+07	PP_0732	Glutamyl-tRNA reductase
Q88PW5	0	0	0	0	2.91513e+07	0	PP_0733	Peptide chain release factor 1
Q88PW4	5.91843e+07	5.38387e+07	5.17247e+07	7.20293e+07	6.70027e+07	57924000	PP_0734	Release factor glutamine methyltransferase
Q88PW3	73636000	7.46787e+07	7.62327e+07	1.36492e+08	9.55163e+07	9.62123e+07	PP_0735	Molybdopterin biosynthesis MoeB protein, putative
Q88PW0	7.17113e+07	97480000	75716000	9.90033e+07	1.46603e+08	1.21563e+08	PP_0738	Conserved domain protein
Q88PV9	1.92133e+08	2.77477e+08	234830000	360630000	324560000	281770000	PP_0739	Deoxyribodipyrimidine photolyase
Q88PV6	2.06877e+08	238480000	1.53167e+08	1.52983e+08	144370000	1.46027e+08	PP_0742	Uncharacterized protein
Q88PV5	62580000	2.57003e+07	33400000	3.07113e+07	33887000	2.71037e+07	PP_0743	Uncharacterized protein
Q88PV4	2.00077e+07	4.31567e+07	1.67693e+07	5.71777e+07	0	0	PP_0744	Ferrochelatase
Q88PV2	388280000	319930000	2.82967e+08	395630000	461560000	472110000	PP_0746	Uracil phosphoribosyltransferase
Q88PV1	171450000	4.33917e+08	1.23667e+08	1.95323e+08	636310000	170710000	PP_0747	Hypoxanthine phosphoribosyltransferase, putative
Q88PV0	0	0	0	0	0	3.71567e+06	PP_0748	Uncharacterized protein
Q88PU8	9.88693e+08	1392366667	1274166667	3050900000	2696900000	2529000000	PP_0750	Uncharacterized protein
Q88PU7	2122033333	1798600000	1895500000	4265700000	3374133333	3932433333	PP_0751	Probable malate:quinone oxidoreductase 1
Q88PU5	1632433333	1059096667	1337900000	2161466667	1306800000	1830000000	PP_0753	Lipoprotein, putative
Q88PU2	89548000	77236000	86621000	97575000	1.20717e+08	9.74253e+07	PP_0756	Uncharacterized protein
Q88PT9	9.04913e+08	7.93967e+08	7.68227e+08	6.00083e+08	567560000	635800000	PP_0759	Uncharacterized protein
Q88PT6	168020000	3.62897e+08	1.52847e+08	2.56217e+08	314060000	2.32573e+08	PP_0762	Glycerate dehydrogenase
Q88PT5	5.80227e+08	1030973333	6.41777e+08	2.00907e+08	1.37497e+08	1.62117e+08	PP_0763	Medium-chain-fatty-acid CoA ligase
Q88PT3	0	0	4706000	0	0	0	PP_0765	Uncharacterized protein
Q88PT2	5304266667	6741833333	4630600000	1137600000	987120000	1381233333	PP_0766	Uncharacterized protein
Q88PT0	194620000	253730000	70282000	230170000	8.91567e+07	174410000	PP_0768	Response regulator/TPR domain protein
Q88PS9	23051000	2.03073e+07	0	0	0	0	PP_0769	Sensor histidine kinase
Q88PS5	3.75983e+08	356500000	1086833333	577280000	2.41467e+08	694280000	PP_0773	OmpA family protein
Q88PS4	1.58527e+08	259130000	166190000	144130000	201560000	1.72943e+08	PP_0774	Phosphate acetyltransferase
Q88PS2	3065766667	2945766667	2779566667	3257266667	3432700000	4015233333	PP_0776	Peptidyl-prolyl cis-trans isomerase
Q88PS1	104832000	4.75163e+07	0	0	0	0	PP_0777	Glutathione peroxidase
Q88PR9	3.45233e+06	5.16867e+07	0	0	0	0	PP_0779	Methyl-accepting chemotaxis transducer/sensory box protein
Q88PR2	515630000	9.66777e+08	929990000	1385566667	1407400000	1018493333	PP_0786	Thioredoxin reductase
Q88PR1	202700000	2.38613e+08	239300000	186160000	2.47057e+08	1.98657e+08	PP_0787	Nicotinate-nucleotide pyrophosphorylase
Q88PQ9	0	0	1.70893e+07	0	0	0	PP_0789	N-acetyl-anhydromuramyl-L-alanine amidase AmpD
Q88PQ8	6.69953e+07	9138000	2.76143e+07	5.92667e+06	0	0	PP_0790	Inner membrane protein AmpE
Q88PQ6	1.89923e+08	119630000	120710000	208300000	1.82397e+08	204240000	PP_0792	Fructose transport system repressor FruR
Q88PQ5	149680000	84712000	102973000	551620000	4.13593e+08	4.62913e+08	PP_0793	Phosphotransferase system, fructose-specific EI/HPr/EIIA components
Q88PQ4	4.53883e+07	3.92203e+07	42170000	3.27873e+08	1.08107e+08	1.90383e+08	PP_0794	Phosphofructokinase
Q88PQ1	4.19947e+08	1.19433e+08	867390000	414730000	305920000	3.71753e+08	PP_0797	Uncharacterized protein
Q88PP7	0	0	0	0	0	1.19233e+07	PP_0801	Uncharacterized protein
Q88PP6	1.85593e+08	91698000	3.24703e+07	37682000	2.39633e+07	37170000	PP_0802	Chemotaxis protein CheV
Q88PP5	4.55077e+08	6.35183e+08	5.41923e+08	2.97223e+08	0	2.07803e+08	PP_0803	Protein secretion ABC efflux system, membrane fusion protein
Q88PP4	117190000	1.77213e+08	96850000	8.06643e+07	3.83623e+07	7.46073e+07	PP_0804	Protein secretion ABC efflux system, permease and ATP-binding protein
Q88PP3	0	3595000	0	0	0	0	PP_0805	Outer membrane efflux protein
Q88PP2	8.98117e+08	6.58227e+08	5.77837e+08	47888000	79483000	7.55427e+07	PP_0806	Surface adhesion protein, putative
Q88PP0	4.27953e+07	0	0	0	36180000	0	PP_0808	Flavohemoprotein
Q88PN7	2.40067e+08	951020000	4.28953e+08	6.26743e+08	7.34033e+08	5.81503e+08	PP_0812	Cytochrome o ubiquinol oxidase, subunit II
Q88PN6	3.64813e+08	1416800000	7.53777e+08	1270936667	1161800000	990330000	PP_0813	Cytochrome o ubiquinol oxidase, subunit I
Q88PN2	1183900000	494040000	524880000	560420000	4.06443e+08	445360000	PP_0817	Aminotransferase, class I
Q88PM7	0	0	0	0	6246000	0	PP_0822	tRNA 2-selenouridine synthase
P59392	1.10293e+08	1.59053e+08	123433000	94857000	75976000	9.67273e+07	PP_0823	Selenide, water dikinase
Q88PM6	9.36277e+08	712290000	748110000	582540000	4.12147e+08	574410000	PP_0824	Phosphate ABC transporter, periplasmic phosphate-binding protein, putative
Q88PL8	0	0	2.74647e+07	0	0	0	PP_0832	S-adenosylmethionine:tRNA ribosyltransferase-isomerase
Q88PL7	457240000	6.28847e+08	6.00713e+08	8.43963e+08	7.41023e+08	8.25083e+08	PP_0833	Queuine tRNA-ribosyltransferase
Q88PL6	1105200000	1576433333	1610366667	1704933333	1323733333	1858066667	PP_0834	Preprotein translocase, YajC subunit
Q88PL5	6.50367e+08	862400000	7.90293e+08	1271500000	1150133333	1170733333	PP_0835	Protein translocase subunit SecD
Q88PL4	0	0	0	0	0	1.16363e+07	PP_0836	Protein-export membrane protein SecF
Q88PL3	1.65977e+08	126259000	1222400000	288940000	1.88643e+08	5.31083e+08	PP_0837	Uncharacterized protein
Q88PL2	1152600000	1611366667	1357233333	1878600000	1670933333	1759633333	PP_0838	Extragenic suppressor protein SuhB
Q88PL1	1.26177e+08	1.26297e+08	130630000	189700000	146630000	1.53173e+08	PP_0839	tRNA (cytidine/uridine-2'-O-)-methyltransferase TrmJ
Q88PL0	85081000	90878000	1.07163e+08	9.88847e+07	1.13181e+08	1.18187e+08	PP_0840	Serine O-acetyltransferase
Q88PK9	1.74243e+08	90795000	1.26523e+08	2.36263e+08	2.24223e+08	286390000	PP_0841	Rrf2 family protein
Q88PK8	4906900000	3176933333	3694300000	5140366667	4501300000	4652900000	PP_0842	Cysteine desulfurase IscS
Q88PK7	1925266667	1637266667	1456100000	3118200000	2488900000	2858533333	PP_0843	Iron-sulfur cluster assembly scaffold protein IscU
Q88PK6	3.58413e+08	337960000	3.38387e+08	490810000	395140000	5.38793e+08	PP_0844	Iron-binding protein IscA
Q88PK5	127954000	1.26884e+08	1.01011e+08	1.55603e+08	117240000	132790000	PP_0845	Co-chaperone protein HscB homolog
Q88PK4	5.54867e+08	544750000	535890000	1013403333	8.51477e+08	885640000	PP_0846	Chaperone protein HscA homolog
Q88PK3	3.52787e+08	248300000	292100000	4.22547e+08	438350000	4.87213e+08	PP_0847	Ferredoxin, 2Fe-2S
Q88PK2	0	0	0	0	0	1.51897e+07	PP_0848	Uncharacterized protein
Q88PK1	8656100000	10392066667	10861666667	15399333333	14328333333	14556000000	PP_0849	Nucleoside diphosphate kinase
Q88PK0	6.39147e+07	8.98457e+07	8.58617e+07	185410000	1.33633e+08	142500000	PP_0850	Dual-specificity RNA methyltransferase RlmN
Q88PJ8	2.75363e+08	2.55327e+08	3.12283e+08	454730000	382720000	3.98737e+08	PP_0852	Transcriptional regulator, Cro/CI family
Q88PJ7	6.93423e+08	844340000	7.97587e+08	1273166667	1066506667	1300566667	PP_0853	4-hydroxy-3-methylbut-2-en-1-yl diphosphate synthase (flavodoxin)
Q88PJ6	7.79753e+08	1036240000	9.73323e+08	2072266667	1539200000	1571133333	PP_0854	Histidine--tRNA ligase
Q88PJ5	7.13427e+08	1077946667	9.69463e+08	1803633333	1541000000	1595766667	PP_0855	Uncharacterized protein
Q88PJ4	3.93167e+08	412330000	4.85577e+08	6.90277e+08	4.91843e+08	6.57107e+08	PP_0856	Outer membrane protein assembly factor BamB
Q88PJ3	1125466667	1105200000	8.28737e+08	1300933333	1451033333	1115740000	PP_0857	GTPase Der
Q88PJ2	7.73333e+06	0	0	0	0	0	PP_0858	Aminotransferase, class I
Q88PJ1	1.17533e+08	6.74653e+07	8.80767e+07	8.15267e+07	4.36563e+07	88698000	PP_0859	Carbon-nitrogen hydrolase family protein
Q88PI6	6.88793e+08	866480000	733500000	1981866667	2328900000	1841266667	PP_0864	Ornithine decarboxylase, putative
Q88PI2	0	0	0	8.46667e+06	0	0	PP_0868	Glycine betaine/carnitine/choline ABC transporter, ATP-binding protein, putative
Q88PH8	2.18877e+08	2.27323e+08	202240000	375430000	4.04763e+08	355970000	PP_0872	Peptide chain release factor 3
Q88PH2	4.23357e+07	3.96287e+08	46891000	37438000	4.26913e+07	3.74443e+07	PP_0878	Dipeptide ABC transporter, ATP-binding protein
Q88PH1	52959000	2.66657e+08	59959000	57151000	56753000	46838000	PP_0879	Dipeptide ABC transporter, ATP-binding protein
Q88PG9	5.48177e+07	3.86787e+08	7.38073e+07	41237000	8.69887e+07	6.09337e+07	PP_0881	Dipeptide ABC transporter, permease protein
Q88PG8	1.69443e+08	1674666667	388550000	80549000	2.32883e+08	8.18977e+07	PP_0882	Dipeptide ABC transporter, periplasmic dipeptide-binding protein
Q88PG6	3.80153e+07	1066800000	171965000	23976000	45513000	3.26643e+07	PP_0884	Dipeptide ABC transporter, periplasmic peptide-binding protein
Q88PG5	2246733333	5436633333	2372533333	8.47803e+08	1176033333	9.00403e+08	PP_0885	Dipeptide ABC transporter, periplasmic peptide-binding protein
Q88PG4	1.96893e+08	2.62073e+08	4.68597e+08	1.67167e+08	1.48013e+08	2.82423e+08	PP_0886	Uncharacterized protein
Q88PG2	3.87673e+07	0	2.58907e+07	1.15237e+07	1.40347e+07	0	PP_0888	Response regulator
Q88PF9	8.84733e+06	2.78087e+07	21416000	17864000	4.49857e+07	2.54157e+07	PP_0891	Uncharacterized protein
Q88PF7	1343366667	2264166667	1077813333	502400000	6.50797e+08	5.03093e+08	PP_0893	ThiJ/PfpI family protein
Q88PF3	3821500000	4120200000	4206833333	9276200000	6961666667	7579166667	PP_0897	Fumarate hydratase, class I
Q88PE9	72968000	1.56232e+08	5.63403e+07	36738000	1.41952e+08	7.46933e+06	PP_0901	DNA-binding response regulator ColR
Q88PE6	8.48933e+06	4.92633e+07	1.79047e+07	2.64807e+07	17117000	1.81967e+07	PP_0904	InaA protein
Q88PE3	1.39567e+08	4.69487e+07	5.50077e+07	0	0	0	PP_0907	RND efflux membrane fusion protein-related protein
Q88PE1	2.02327e+08	2.11893e+08	211650000	524230000	316870000	5.43457e+08	PP_0909	Uncharacterized protein
Q88PD7	4052066667	9947966667	5940200000	12897000000	14953000000	12108666667	PP_0913	Uncharacterized protein
Q88PD6	1.84443e+08	7.65883e+07	5.05157e+07	65856000	17776000	47793000	PP_0914	GGDEF domain protein
Q88PD5	4313800000	3228400000	3103266667	2873333333	2269200000	3009433333	PP_0915	Superoxide dismutase [Fe]
Q88PD1	2.03037e+08	2.13403e+08	211100000	2.67747e+08	1.67353e+08	2.02003e+08	PP_0919	Uncharacterized protein
Q88PD0	1.43943e+08	310490000	2.84197e+08	532310000	4.14783e+08	427460000	PP_0920	Xenobiotic reductase B
Q88PC5	8.37467e+07	90096000	5.76587e+07	2.41607e+07	1.96997e+07	1.39157e+07	PP_0925	Uncharacterized protein
Q88PC0	8.99117e+08	799660000	846710000	1070406667	1091300000	1121966667	PP_0930	Aspartyl/glutamyl-tRNA(Asn/Gln) amidotransferase subunit B
Q88PB9	1139673333	1036033333	1126976667	1793266667	1350366667	1417700000	PP_0931	Glutamyl-tRNA(Gln) amidotransferase subunit A
Q88PB8	1.62277e+08	1.61133e+08	167510000	3.38157e+08	2.98487e+08	289130000	PP_0932	Aspartyl/glutamyl-tRNA(Asn/Gln) amidotransferase subunit C
Q88PB7	2380966667	1938666667	2786000000	3938300000	2660700000	3552433333	PP_0933	Rod shape-determining protein MreB
Q88PB6	9.20527e+07	1.21303e+08	9.44973e+07	139000000	1.06376e+08	1.25837e+08	PP_0934	Rod shape determining protein MreC
Q88PB4	21171000	0	0	0	0	0	PP_0936	Maf-like protein PP_0936
Q88PB3	1.54177e+08	70788000	7.27883e+07	4.49273e+07	57074000	5.17087e+07	PP_0937	Cytoplasmic axial filament protein
Q88PB2	0	0	0	0	0	7.91767e+07	PP_0938	Uncharacterized protein
Q88PB1	5.89487e+07	89821000	4.77907e+07	6.55303e+07	84321000	83645000	PP_0939	Carbon-nitrogen hydrolase family protein
Q88PB0	2.69563e+08	283660000	2.64223e+08	3.85387e+08	283330000	3.47453e+08	PP_0940	TldD protein
Q88PA9	1.42813e+08	1.16702e+08	1.44097e+08	2.63833e+08	1.73113e+08	2.09573e+08	PP_0941	UPF0307 protein PP_0941
Q88PA8	5.52417e+08	767890000	7.10867e+08	7.68947e+08	6.21767e+08	679830000	PP_0942	PmbA protein
Q88PA1	2.21693e+08	1.86273e+08	118770000	139890000	102780000	95303000	PP_0949	Nucleotide-binding protein PP_0949
Q88PA0	159560000	52070000	138420000	49010000	56720000	1.01913e+08	PP_0950	Phosphotransferase system, nitrogen regulatory IIA protein
P0A147	4920233333	5031866667	5604900000	2341933333	2726666667	3334333333	PP_0951	Ribosome hibernation promoting factor
P0A171	2.36987e+08	2.29617e+08	230890000	2.02823e+08	220160000	2.37073e+08	PP_0952	RNA polymerase sigma-54 factor
Q88P99	6.02837e+08	4.20973e+08	4.88653e+08	605020000	440320000	5.16957e+08	PP_0953	ABC transporter, ATP-binding protein, putative
Q88P98	1051820000	7.07263e+08	9.38143e+08	5.70717e+08	7.03703e+08	9.18233e+08	PP_0954	Lipopolysaccharide export system protein LptA
Q88P97	1.30878e+08	104156000	1.33267e+08	182910000	1.32997e+08	2.13627e+08	PP_0955	Lipopolysaccharide export system protein LptC
Q88P96	56895000	0	0	0	0	0	PP_0956	Phosphatase, YrbI family
Q88P95	6.22937e+08	6.68187e+08	6.85553e+08	8.11037e+08	530520000	7.86713e+08	PP_0957	Arabinose 5-phosphate isomerase
Q88P94	239720000	2.32917e+08	2.61223e+08	401640000	2.51687e+08	3.33347e+08	PP_0958	Toluene tolerance ABC efflux transporter, ATP-binding protein
Q88P92	2.39727e+07	0	0	0	0	0	PP_0960	Toluene tolerance ABC transporter, periplasmic substrate-binding protein
Q88P91	1645533333	1764666667	1765066667	1385533333	1238966667	1417866667	PP_0961	Toluene-tolerance protein
Q88P90	0	0	0	0	0	3.37333e+07	PP_0962	Toluene-tolerance protein
Q88P88	1724033333	1562500000	1567200000	1846133333	1840933333	1793066667	PP_0964	UDP-N-acetylglucosamine 1-carboxyvinyltransferase
Q88P87	324560000	3.56647e+08	3.90477e+08	4.76323e+08	3.29583e+08	4.51117e+08	PP_0965	ATP phosphoribosyltransferase
P59400	6.48993e+08	793570000	9.78057e+08	1533066667	2053266667	1659200000	PP_0966	Histidinol dehydrogenase
Q88P86	4.13497e+08	566590000	5.48303e+08	1073903333	985260000	9.53413e+08	PP_0967	Histidinol-phosphate aminotransferase
Q88P82	1.54853e+08	72030000	158720000	8.62983e+07	4.62213e+07	9.26497e+07	PP_0971	Uncharacterized protein
Q88P80	83706000	7.92017e+07	8.67103e+07	1.26017e+08	1.03773e+08	109720000	PP_0973	Nucleoid-associated protein PP_0973
Q88P78	761630000	4.63143e+08	1950433333	959640000	1010306667	833030000	PP_0975	DNA-binding protein HU, form N
Q88P76	1872933333	3349033333	2702633333	4655066667	4186166667	3824500000	PP_0977	Valine--tRNA ligase
Q88P75	192620000	183840000	1.52837e+08	0	46200000	1.40867e+08	PP_0978	Uncharacterized protein
Q88P74	0	3257000	0	0	0	0	PP_0979	DNA polymerase III, chi subunit
Q88P73	1918033333	1450933333	1063006667	1030270000	8.82637e+08	9.21423e+08	PP_0980	Probable cytosol aminopeptidase
Q88P71	175720000	146016000	1.53777e+08	99845000	8.76607e+07	143360000	PP_0982	Uncharacterized protein
Q88P70	8.35183e+07	4.96103e+07	84130000	5.67087e+07	4.62697e+07	8.05773e+07	PP_0983	Uncharacterized protein
Q88P67	277500000	4.48707e+08	4.59787e+08	1008326667	704830000	876900000	PP_0986	Aminomethyltransferase
Q88P65	6.91787e+07	533730000	4.04433e+08	2713500000	1264533333	1627233333	PP_0988	Glycine dehydrogenase (decarboxylating) 1
Q88P64	0	0	0	25003000	0	0	PP_0989	Glycine cleavage system H protein 1
Q88P55	9.12293e+08	6.67057e+08	4.46217e+08	7.38983e+07	1.04244e+08	109790000	PP_0998	Uncharacterized protein
Q88P54	770100000	828260000	274950000	3.58003e+07	4.59933e+07	3.45407e+07	PP_0999	Carbamate kinase
Q88P53	7123866667	8476633333	3516666667	7.89197e+08	1743300000	1221756667	PP_1000	Ornithine carbamoyltransferase, catabolic
Q88P52	9410166667	14242000000	5002533333	1536166667	1759800000	1641233333	PP_1001	Arginine deiminase
Q88P44	793740000	1633900000	1200466667	13632666667	16835000000	12081000000	PP_1009	Glyceraldehyde-3-phosphate dehydrogenase
Q88P43	1271266667	1734166667	2065366667	13854000000	8966600000	12137666667	PP_1010	6-phosphogluconate dehydratase
Q88P42	180190000	189700000	2.00633e+08	1040106667	6.86157e+08	1008743333	PP_1011	Glucokinase
Q88P41	1.09853e+08	2.17403e+08	134870000	6.04597e+08	5.94797e+08	633700000	PP_1012	DNA-binding response regulator GltR
Q88P40	0	0	0	0	0	1.00183e+07	PP_1013	Sensor histidine kinase
Q88P39	0	0	4.41903e+07	6.08203e+08	2.09037e+08	4.03273e+08	PP_1014	Uncharacterized protein
Q88P38	13235000000	1876700000	13294333333	51843333333	48657000000	50057333333	PP_1015	Sugar ABC transporter, periplasmic sugar-binding protein
Q88P37	2.28647e+07	90840000	1.20683e+08	721010000	6.57733e+08	642400000	PP_1016	Sugar ABC transporter, permease protein
Q88P36	0	0	0	0	0	9.83333e+07	PP_1017	Sugar ABC transporter, permease protein
Q88P35	6.59753e+08	2.42617e+08	9.34027e+08	8699066667	7391266667	7704233333	PP_1018	Sugar ABC transporter, ATP-binding subunit
Q88P34	0	0	0	416580000	7.45627e+07	7.06063e+07	PP_1019	Porin B
Q88P33	0	0	0	3.05547e+08	2.40873e+08	324920000	PP_1020	Uncharacterized protein
Q88P32	6.18563e+07	37540000	34537000	7.68233e+06	2.83207e+07	7.26267e+06	PP_1021	HTH-type transcriptional regulator HexR
Q88P31	1112700000	397700000	1340433333	5765933333	4766966667	5075333333	PP_1022	Glucose-6-phosphate 1-dehydrogenase
Q88P30	1719200000	6.13297e+08	1968533333	10908700000	7428966667	8799600000	PP_1023	6-phosphogluconolactonase
Q88P29	4.31393e+08	181310000	5.59057e+08	2515266667	2607900000	2348033333	PP_1024	2-dehydro-3-deoxyphosphogluconate aldolase/4-hydroxy-2-oxoglutarate aldolase
Q88P28	31557666667	13742333333	12657333333	6746166667	6163233333	5156400000	PP_1025	2-isopropylmalate synthase
Q88P26	5.06197e+07	90212000	84720000	119690000	1.24487e+08	9.35897e+07	PP_1027	Exodeoxyribonuclease 7 large subunit
Q88P22	3382166667	2259900000	2381066667	3691433333	2559400000	3031166667	PP_1031	Inosine-5'-monophosphate dehydrogenase
Q88P21	2253733333	1877566667	1931166667	3087966667	2252333333	2720100000	PP_1032	GMP synthase [glutamine-hydrolyzing]
Q88P16	4968833333	3325566667	4390133333	9227733333	7086766667	7677766667	PP_1037	Phosphoribosylformylglycinamidine synthase
Q88NZ7	0	7.35357e+07	51272000	56484000	45824000	5.75637e+07	PP_1056	Iron-chelator utilization protein, putative
Q88NZ6	0	0	0	0	0	1.47353e+07	PP_1057	Transcriptional regulator, PadR family
Q88NZ3	8.82527e+07	231210000	1.44361e+08	1.48457e+08	8.85663e+07	1.40273e+08	PP_1060	Glutamate synthase, large subunit, putative
Q88NZ1	0	0	0	0	0	9.36833e+06	PP_1062	MutT/nudix family protein
Q88NZ0	32423000	5.81457e+07	57253000	6.47457e+07	5.15993e+07	4.73563e+07	PP_1063	Transcriptional activator MetR
Q88NY7	6.45033e+07	9.33743e+07	6.91247e+07	76862000	6.66993e+07	7.21147e+07	PP_1066	Sigma-54 dependent response regulator
Q88NY5	372450000	6.32373e+08	5.36733e+08	232870000	2.73027e+08	3.08403e+08	PP_1068	Amino acid ABC transporter, ATP-binding protein
Q88NY3	0	0	0	7.95633e+06	0	0	PP_1070	Amino acid ABC transporter, permease protein
Q88NY2	14280666667	14243333333	12157666667	4544200000	5019533333	4831700000	PP_1071	Amino acid ABC transporter, periplasmic amino acid-binding protein
Q88NX9	0	0	0	37060000	0	0	PP_1074	Glycerol-3-phosphate regulon repressor
Q88NX8	9.61793e+07	5.76027e+08	112510000	1.47253e+08	4.95123e+08	123617000	PP_1075	Glycerol kinase
Q88NX6	0	1.30917e+08	0	3.42687e+07	2.30063e+07	22576000	PP_1077	Cys-tRNA(Pro)/Cys-tRNA(Cys) deacylase
Q88NX5	75479000	131320000	9.80097e+07	2.75903e+08	5.09643e+08	2.63513e+08	PP_1078	ABC transporter, ATP-binding protein, putative
Q88NX4	2.82867e+08	4.48533e+08	3.84833e+08	7.87257e+08	9.02123e+08	6.53377e+08	PP_1079	Ornithine carbamoyltransferase
Q88NX2	1423133333	1014310000	1489166667	2903066667	1575400000	2520833333	PP_1081	Glutaredoxin
Q88NX1	0	0	0	898300	0	0	PP_1082	Ferroxidase
Q88NW9	14018666667	19184333333	20505333333	21943000000	18271666667	19874000000	PP_1084	Antioxidant, AhpC/Tsa family
Q88NW8	0	0	1.64953e+06	0	0	0	PP_1085	Ribonuclease T
Q88NW7	0	0	0	26684000	0	0	PP_1086	Dihydroorotase
Q88NW6	3.57887e+08	2.82207e+08	1.43153e+08	172300000	8.44813e+07	122366000	PP_1087	Outer membrane protein, OmpA family
P59604	9364333333	4766200000	8393366667	13761000000	10482333333	12885333333	PP_1088	Argininosuccinate synthase
Q88NW2	0	0	3.92867e+06	0	0	0	PP_1092	Endonuclease III
Q88NV7	1588533333	2147500000	1840566667	2989266667	2755666667	2870566667	PP_1097	Methionine--tRNA ligase
Q88NV6	2.82427e+08	3.69857e+08	382320000	591000000	4.56787e+08	5.45817e+08	PP_1098	Iron-sulfur cluster carrier protein
Q88NV5	7389333333	12310666667	14850000000	24271333333	24318000000	22814666667	PP_1099	Cold-shock domain family protein
Q88NV4	484160000	4.59083e+08	497220000	8.05723e+08	6.91053e+08	556810000	PP_1100	Deoxycytidine triphosphate deaminase
Q88NU6	2.31473e+08	2.94733e+08	1.46793e+08	2.26157e+08	2.45673e+08	1.76023e+08	PP_1108	Acyl-homoserine lactone acylase QuiP
Q88NU4	0	0	0	0	0	1.10097e+07	PP_1110	Serine acetyltransferase
Q88NU3	0	436980000	436750000	8.26753e+08	4.92677e+08	5.18827e+08	PP_1111	Synthetase, putative
Q88NU2	0	2.96603e+07	3.13733e+07	21218000	33722000	38983000	PP_1112	Uncharacterized protein
Q88NU1	37731000	8.34057e+08	735030000	1238496667	8.67567e+08	1013370000	PP_1113	Pyridoxal-phosphate dependent enzyme family protein
Q88NU0	0	0	0	0	0	1.14403e+06	PP_1114	SEC-C domain protein
Q88NT4	0	4.17723e+07	1.01177e+07	1.35097e+07	1.43843e+07	0	PP_1120	Uncharacterized protein
Q88NT3	3083733333	1507400000	1310533333	5.70933e+08	7.64633e+08	5.10257e+08	PP_1121	OmpA family protein
Q88NT2	3.87813e+08	241410000	194210000	8.35423e+07	44294000	5.16043e+07	PP_1122	OmpA family protein
Q88NS9	3.04447e+07	34877000	3.67603e+07	3.99227e+07	4.47007e+07	6.46363e+07	PP_1125	Helicase, putative
Q88NS8	0	0	0	0	0	4.75467e+06	PP_1126	Hydrolase, putative
Q88NS7	44951000	2.48003e+07	7.75853e+07	36980000	119180000	9.10243e+07	PP_1127	Carboxylesterase
Q88NS6	59518000	1.30006e+08	2.97503e+08	2.52007e+08	193800000	252930000	PP_1128	OmpA family protein
Q88NS5	4.28257e+08	344000000	5.15773e+08	3.09957e+08	317940000	2.86777e+08	PP_1129	Pyridoxine/pyridoxamine 5'-phosphate oxidase
Q88NS3	2.60057e+08	1.13535e+08	2.28797e+08	2.99297e+08	1.47767e+08	2.52193e+08	PP_1131	Outer membrane lipoprotein, putative
Q88NS1	3.02317e+08	2.76673e+08	277530000	339690000	4.85487e+08	4.05613e+08	PP_1134	Uncharacterized protein
Q88NS0	1.15043e+08	1.23731e+08	206340000	2.09253e+08	1.64803e+08	199540000	PP_1135	Uncharacterized protein
Q88NR9	11410000	2.23803e+07	1.47457e+08	8.99167e+06	2.31463e+07	2.82813e+07	PP_1136	Uncharacterized protein
Q88NR8	5.25213e+08	1181400000	548030000	564100000	7.48937e+08	541000000	PP_1137	High-affinity branched-chain amino acid transport ATP-binding protein
Q88NR7	666090000	1322433333	4.89783e+08	506630000	5.85833e+08	3.78323e+08	PP_1138	Branched-chain amino acid ABC transporter, ATP-binding protein
Q88NR6	1.20173e+08	674010000	1.63517e+08	9.98367e+07	1.55267e+08	88490000	PP_1139	Branched-chain amino acid ABC transporter, permease protein
Q88NR4	37839333333	61618000000	29638000000	10537000000	18804333333	10597666667	PP_1141	Branched-chain amino acid ABC transporter, periplasmic amino acid-binding protein
Q88NR2	1.31177e+08	4.53863e+08	151580000	2.42003e+08	287740000	1.98427e+08	PP_1143	3-hydroxyisobutyrate dehydrogenase family protein
Q88NR0	308980000	1.97087e+08	2.63213e+08	5.08317e+08	305290000	443980000	PP_1145	RNA polymerase-associated protein RapA
Q88NQ9	285420000	1.66373e+08	1.62583e+08	99801000	1.55833e+08	139570000	PP_1146	Uncharacterized protein
Q877U6	1486100000	1290200000	1890666667	2424600000	2155766667	2853866667	PP_1157	Acetolactate synthase, catabolic, putative
Q88NN8	8.69667e+06	0	0	0	0	0	PP_1169	TRAP dicarboxylate transporter, DctP subunit
Q88NN6	0	0	0	0	1.32853e+06	0	PP_1171	Uronate dehydrogenase
Q88NN0	1053510000	1682066667	1668733333	1956066667	1994033333	2118200000	PP_1177	Ribonucleoside-diphosphate reductase subunit beta
Q88NM8	3058533333	3432266667	4107600000	6014100000	3893433333	5447333333	PP_1179	Ribonucleoside-diphosphate reductase
Q88NM3	5.81357e+08	399930000	4.30707e+08	1.83343e+08	1.96497e+08	228670000	PP_1184	Dienelactone hydrolase family protein
Q88NM2	0	0	0	49797000	7.16977e+07	5.18537e+07	PP_1185	Outer membrane protein H1
Q88NM1	3.43287e+07	53105000	1.65957e+07	1.01122e+08	1.89043e+08	157994000	PP_1186	Transcriptional regulatory protein PhoP
Q88NL9	7.48673e+07	32398000	2.83217e+07	0	0	0	PP_1188	C4-dicarboxylate transport protein
Q88NL7	1.77697e+08	210090000	1.28457e+08	2.97597e+08	2.15307e+08	2.15873e+08	PP_1190	Uncharacterized protein
Q88NL6	0	0	2.24363e+07	85975000	0	0	PP_1191	S4 domain protein
Q88NL0	2.78567e+08	4.36603e+08	3.55227e+08	5.48937e+08	744150000	5.78637e+08	PP_1197	Ribosomal protein S12 methylthiotransferase RimO
Q88NK9	8.58747e+07	71379000	5.82457e+07	49727000	4.47697e+07	3.16343e+07	PP_1198	Transcriptional regulator, Cro/CI family
Q88NK8	2.17187e+07	0	0	0	0	0	PP_1199	Uncharacterized protein
Q88NK6	1.97558e+08	6.41657e+07	7.81863e+07	61343000	1.72447e+07	3.49003e+07	PP_1201	Uncharacterized protein
Q88NK3	2.77413e+07	44178000	4.57307e+07	1.33252e+08	9.99383e+07	9.73873e+07	PP_1204	Lipoprotein, putative
Q88NK2	3756600000	5523433333	4671366667	7964500000	8782900000	6934866667	PP_1205	Proline--tRNA ligase
Q88NK1	0	0	0	0	0	2209400	PP_1206	Porin D
Q88NK0	3.23097e+07	53553000	5.02473e+07	92897000	9.22097e+07	1.11358e+08	PP_1207	Uncharacterized protein
Q88NJ8	243810000	256890000	274760000	176230000	2.43277e+08	2.48787e+08	PP_1209	Cold-shock domain family protein
Q88NJ7	1173800000	1064123333	698230000	327100000	4.44457e+08	275360000	PP_1210	DNA-binding stress protein, putative
Q88NJ5	57626000	106539000	1.0917e+08	2.42897e+08	1.37907e+08	1.93783e+08	PP_1212	Conserved domain protein
Q88NJ4	4055466667	5613866667	4607233333	6829600000	6465933333	6117866667	PP_1213	Aspartate--tRNA(Asp/Asn) ligase
Q88NJ3	1.79837e+08	265440000	219790000	269400000	3.22403e+08	2.72523e+08	PP_1214	Probable transcriptional regulatory protein PP_1214
Q88NJ1	93570000	1.04973e+08	9.95133e+07	1.85353e+08	2.36613e+08	1.73257e+08	PP_1216	Holliday junction ATP-dependent DNA helicase RuvA
Q88NJ0	9.05027e+07	1.66597e+08	8.43463e+07	70880000	81040000	7.37817e+07	PP_1217	Holliday junction ATP-dependent DNA helicase RuvB
Q88NI9	6.91583e+07	8.30083e+07	5.38357e+07	5.37033e+07	7.72777e+07	72116000	PP_1218	Uncharacterized protein
Q88NI8	8.34287e+07	1.09466e+08	102615000	237860000	220300000	1.89417e+08	PP_1219	Biopolymer transport protein TolQ
Q88NI7	114404000	136320000	1.22091e+08	2.20167e+08	155050000	1.76493e+08	PP_1220	Biopolymer transport protein TolR
Q88NI6	1.37647e+07	22983000	9.29633e+06	18344000	3.00047e+07	2.93487e+07	PP_1221	Biopolymer transport protein TolA
P0A173	1173706667	1950466667	2455133333	2697100000	2296066667	2815533333	PP_1222	Protein TolB
P0A138	6945200000	6720933333	6684933333	12214333333	10745533333	9607100000	PP_1223	Peptidoglycan-associated lipoprotein
P0A130	4.28603e+08	6.04497e+08	6.01087e+08	8.42757e+08	6.79667e+08	7.13197e+08	PP_1224	Uncharacterized protein PP_1224
Q88NI3	416630000	1.26444e+08	1.54413e+08	237280000	2.38057e+08	219770000	PP_1226	HlyD family secretion protein
Q88NI1	0	0	0	18665000	0	0	PP_1228	Methyl-accepting chemotaxis transducer
Q88NH9	1.71457e+08	212050000	2.05803e+08	3.91343e+08	1.53327e+08	3.12227e+08	PP_1230	Uncharacterized protein
Q88NH8	1.32447e+07	30372000	4.00963e+07	8.53017e+07	8.27983e+07	73689000	PP_1231	Quinolinate synthase A
Q88NH7	7.43877e+08	9.14623e+08	6.01293e+08	3.39847e+08	254890000	324040000	PP_1232	Putative beta-barrel assembly-enhancing protease
Q88NH4	6.73783e+08	645420000	6.37867e+08	646990000	6.48727e+08	7.09217e+08	PP_1235	AhpC/TSA family protein
Q88NH3	0	0	0	0	0	2.80017e+07	PP_1236	Glycine cleavage system transcriptional repressor, putative
Q88NH2	1947800000	1736166667	1775900000	2731500000	2661733333	2592166667	PP_1237	4-hydroxy-tetrahydrodipicolinate synthase
Q88NH1	1251300000	1006446667	1171566667	1718833333	1291566667	1340900000	PP_1238	Lipoprotein, putative
Q88NG9	1298866667	1180933333	1505200000	2185633333	2216500000	2001900000	PP_1240	Phosphoribosylaminoimidazole-succinocarboxamide synthase
Q88NG4	1.56447e+08	2.93493e+08	2.96047e+08	1175866667	812360000	1211333333	PP_1245	Uncharacterized protein
Q88NG3	7.88853e+08	1028386667	1247333333	3709833333	2319466667	2999233333	PP_1246	Conserved domain protein
Q88NG0	0	0	0	0	0	5739000	PP_1249	Lipoprotein, putative
Q88NF9	0	0	0	1.19753e+07	0	0	PP_1251	Probable malate:quinone oxidoreductase 2
Q88NF8	0	0	0	0	0	3.21207e+08	PP_1253	Transcriptional regulator, ArsR family
Q88NF7	5.24963e+07	1.12587e+08	73938000	1.15587e+08	9.98823e+07	1.00051e+08	PP_1254	Xenobiotic reductase A
Q88NF1	2.97017e+08	190400000	156930000	3.24097e+08	195870000	2.33933e+08	PP_1261	D-isomer specific 2-hydroxyacid dehydrogenase family protein
Q88ND8	0	0	0	0	0	7.29033e+06	PP_1274	Oxidoreductase, short-chain dehydrogenase/reductase family
Q88ND7	0	0	3.98067e+06	0	0	0	PP_1275	Uncharacterized protein
Q88ND5	1.37333e+08	1.30607e+08	4.18297e+08	1.88537e+08	176940000	182660000	PP_1277	Alginate biosynthesis protein AlgA
Q88ND4	0	4.33033e+06	2504933333	0	0	3.61603e+07	PP_1278	Alginate biosynthesis protein AlgF
Q88ND3	0	0	1.7483e+08	0	0	0	PP_1279	Probable alginate O-acetylase AlgJ
Q88ND1	8.79567e+07	0	1.60743e+08	1.08407e+08	90440000	1.42757e+08	PP_1281	Alginate lyase
Q88NC9	0	0	200583000	0	0	0	PP_1283	Poly(beta-D-mannuronate) C5 epimerase
Q88NC7	79813000	5.88237e+07	1001676667	0	2.15937e+07	0	PP_1285	Alginate biosynthesis protein AlgK
Q88NC6	41118000	51063000	4.77473e+08	65417000	8.91357e+07	8.79817e+07	PP_1286	Alginate biosynthesis protein Alg44
Q88NC4	4.07637e+06	7.62253e+06	3558623333	6.81607e+06	1.07345e+07	1.04067e+07	PP_1288	GDP-mannose 6-dehydrogenase
Q88NC3	6.70483e+07	141040000	131952000	188020000	1.30487e+08	1.36078e+08	PP_1289	UPF0246 protein PP_1289
Q88NC1	1.99653e+08	2.85563e+08	1.90483e+08	3.47187e+08	2.53377e+08	2.59847e+08	PP_1291	PhoH family protein
Q88NC0	132199000	1.17564e+08	78105000	1.28142e+08	87146000	8.02293e+07	PP_1292	Cyclic pyranopterin monophosphate synthase accessory protein
Q88NB9	76969000	45003000	4.31437e+07	1.20793e+07	2.35697e+07	28714000	PP_1293	Molybdopterin synthase sulfur carrier subunit
Q88NB8	7451000	0	0	0	0	0	PP_1294	Molybdenum cofactor biosynthesis protein E
Q88NB7	23952000	0	0	0	0	0	PP_1295	ATP-dependent RNA helicase RhlB
Q88NB6	1.2537e+08	3.90713e+08	1.51297e+08	1.33637e+08	277090000	9.64353e+07	PP_1296	Carboxylesterase
Q88NB4	0	5.43557e+07	0	0	0	0	PP_1298	General amino acid ABC transporter, permease protein
Q88NB2	0	1.55117e+08	0	0	0	0	PP_1300	Amino acid ABC transporter, ATP-binding protein
Q88NB1	1.44913e+08	96140000	8.21983e+07	2.02067e+08	79459000	1.39643e+08	PP_1301	HtrA-like protease AlgW
Q88NA9	9.00263e+08	964190000	9.71747e+08	1940900000	1762800000	1931233333	PP_1303	Sulfate adenylyltransferase subunit 2
Q88NA8	1552200000	2080466667	2022800000	5599200000	4293600000	4784933333	PP_1304	Sulfate adenylyltransferase subunit 1
Q88NA7	0	0	0	0	0	4.72167e+06	PP_1305	Pyocin S-type immunity protein, putative
Q88NA3	1473933333	1598000000	1302466667	9.40177e+08	1123166667	7.63247e+08	PP_1309	Uncharacterized protein
Q88NA2	0	0	0	10558000	0	0	PP_1310	Uncharacterized protein
Q88NA1	8.58427e+08	1004073333	8.12513e+08	1579100000	1628933333	1280933333	PP_1311	Tryptophan--tRNA ligase
Q88NA0	130820000	1.76307e+08	1.45603e+08	2.97187e+08	3.23573e+08	3.27723e+08	PP_1312	Cell division protein ZapE
Q88N99	1.1161e+08	1.74297e+08	1.28567e+08	166340000	1.99367e+08	1.43327e+08	PP_1313	Transcriptional regulator, AraC family
Q88N98	305270000	7.53983e+08	2.66553e+08	161690000	207050000	1.26411e+08	PP_1314	Oxidoreductase, aldo/keto reductase family
Q88N97	6036066667	6549200000	8610866667	6580100000	8583533333	8779100000	PP_1315	50S ribosomal protein L13
Q88N96	3218900000	4075666667	4646833333	5320900000	7445566667	6563066667	PP_1316	30S ribosomal protein S9
Q88N95	1275466667	987140000	7.15777e+08	519010000	2.77173e+08	378610000	PP_1317	Ubiquinol-cytochrome c reductase iron-sulfur subunit
Q88N94	0	0	0	0	0	1.75583e+06	PP_1318	Cytochrome b
Q88N93	1466133333	1112346667	991400000	4.39767e+08	316150000	457780000	PP_1319	Ubiquinol--cytochrome c reductase, cytochrome c1
Q88N92	1.88393e+08	2.03573e+08	1.84347e+08	1.85357e+08	194840000	2.19107e+08	PP_1320	Stringent starvation protein A
Q88N91	0	0	0	0	0	1.24447e+07	PP_1321	Stringent starvation protein B
Q88N90	6.01107e+08	583600000	8.53697e+08	880000000	4.95063e+08	7.06397e+08	PP_1322	Lipoprotein, putative
Q88N89	0	0	0	3.47133e+06	0	0	PP_1323	Phosphoheptose isomerase
Q88N87	1.87747e+08	1.86497e+08	1.92537e+08	3.13123e+08	146930000	221320000	PP_1325	Lipoprotein, putative
Q88N86	0	0	0	22834000	0	0	PP_1326	Ribosomal RNA small subunit methyltransferase I
Q88N85	0	0	0	0	3.80267e+06	0	PP_1328	Transcriptional regulator MraZ
Q88N84	2.80697e+08	2.58243e+08	3.08913e+08	3.89017e+08	2.62007e+08	3.31743e+08	PP_1329	Ribosomal RNA small subunit methyltransferase H
Q88N82	102028000	8.21133e+07	6.21763e+07	1.11293e+08	1.09662e+08	106910000	PP_1331	Penicillin-binding protein 3
Q88N81	1794866667	1512666667	1225166667	1136833333	1136300000	965190000	PP_1332	UDP-N-acetylmuramoyl-L-alanyl-D-glutamate--2,6-diaminopimelate ligase
Q88N80	8.65267e+08	707410000	5.34943e+08	603120000	5.89933e+08	5.08413e+08	PP_1333	UDP-N-acetylmuramoyl-tripeptide--D-alanyl-D-alanine ligase
Q88N79	0	0	0	0	903700	0	PP_1334	Phospho-N-acetylmuramoyl-pentapeptide-transferase
Q88N78	2.48187e+08	1.73777e+08	1.46483e+08	178760000	1.68083e+08	154360000	PP_1335	UDP-N-acetylmuramoylalanine--D-glutamate ligase
Q88N76	264330000	1.73943e+08	1.37557e+08	127406000	1.42853e+08	1.25167e+08	PP_1337	UDP-N-acetylglucosamine--N-acetylmuramyl-(pentapeptide) pyrophosphoryl-undecaprenol N-acetylglucosamine transferase
Q88N75	5.61883e+08	6.10427e+08	496310000	703510000	7.18203e+08	587810000	PP_1338	UDP-N-acetylmuramate--L-alanine ligase
Q88N74	1.32027e+08	9.08167e+07	39730000	4.45133e+07	59100000	1.68927e+08	PP_1339	D-alanine--D-alanine ligase B
Q88N72	1786300000	1503433333	1529166667	1517300000	1505766667	1508033333	PP_1341	Cell division protein FtsA
Q59692	2787566667	3873033333	3252700000	5717966667	5321333333	4495600000	PP_1342	Cell division protein FtsZ
Q88N71	1613766667	1359800000	1371033333	1100566667	1601466667	1332633333	PP_1343	UDP-3-O-acyl-N-acetylglucosamine deacetylase
Q88N69	1408866667	1275233333	1580033333	2044466667	1862566667	2017766667	PP_1345	Protein translocase subunit SecA
P59612	5.53583e+08	6.35847e+08	875390000	1465100000	1114263333	1356400000	PP_1346	Arginine biosynthesis bifunctional protein ArgJ
Q88N68	1.87323e+08	117940000	1.92467e+08	1.33647e+08	101728000	1.2077e+08	PP_1347	Glutathione S-transferase family protein
Q88N67	2.03613e+08	256050000	306860000	4.80267e+08	3.25953e+08	4.08523e+08	PP_1348	MutT/nudix family protein/thiamine-phosphate pyrophosphorylase, putative
P59560	1205033333	1129766667	1452286667	8.55457e+08	8.58733e+08	9.86813e+08	PP_1352	UPF0234 protein PP_1352
Q88N63	98654000	97925000	2.79673e+08	174156000	116670000	213750000	PP_1353	Uncharacterized protein
Q88N58	3.94983e+08	6.96383e+08	3.76517e+08	2.75643e+08	435160000	2.71847e+08	PP_1358	Uncharacterized protein
Q88N56	5649533333	9068100000	9867000000	10317600000	7164233333	10700166667	PP_1360	10 kDa chaperonin
Q88N55	26365666667	38687000000	41054000000	65004666667	53633666667	61848666667	PP_1361	60 kDa chaperonin
Q88N54	1674166667	1484366667	1596366667	3145500000	2501133333	2807433333	PP_1362	Pyruvate kinase
Q88N50	8181000000	8042800000	8144866667	8952633333	8079866667	8357300000	PP_1366	Transcriptional regulator MvaT, P16 subunit
Q88N49	2.64253e+08	142680000	189810000	195810000	221670000	2.31577e+08	PP_1367	Formyltetrahydrofolate deformylase
Q88N45	751630000	6.93363e+08	326860000	799770000	463520000	641660000	PP_1371	Methyl-accepting chemotaxis transducer
Q88N44	8.28177e+08	889060000	521900000	2.42247e+08	394670000	2.83193e+08	PP_1372	Uncharacterized protein
Q88N43	1.68063e+08	142730000	1.74707e+08	332340000	284720000	3.53327e+08	PP_1373	Low-affinity inorganic phosphate transporter
Q88N42	0	0	0	0	0	41930000	PP_1374	Conserved domain protein
Q88N41	3.22603e+06	0	0	0	0	0	PP_1375	Pca regulon regulatory protein
Q88N39	4.43483e+08	1.58703e+08	1.81577e+08	229900000	1.71617e+08	6.75167e+07	PP_1377	Beta-ketoadipyl CoA thiolase PhaD
Q88N37	381700000	4.70967e+08	4.68337e+08	514930000	4.61113e+08	4.30173e+08	PP_1379	3-carboxy-cis,cis-muconate cycloisomerase
Q88N36	3.02837e+08	350500000	2.83727e+08	122259000	152643000	116860000	PP_1380	3-oxoadipate enol-lactone hydrolase
Q88N35	9.74237e+07	3.68243e+07	4.15217e+07	6.93233e+06	8087000	9.79233e+06	PP_1381	4-carboxymuconolactone decarboxylase
Q88N32	0	2.46477e+07	0	0	0	0	PP_1384	Probable efflux pump outer membrane protein TtgC
Q88N31	1.77067e+08	201450000	2.69643e+08	334970000	2.69757e+08	3.40753e+08	PP_1385	Probable efflux pump membrane transporter TtgB
Q88N30	4.57113e+08	510640000	4.33453e+08	6.26233e+08	752150000	6.29133e+08	PP_1386	Probable efflux pump periplasmic linker TtgA
Q88N27	3.33247e+08	379540000	3.58903e+08	5.18857e+08	5.50333e+08	4.13887e+08	PP_1389	Oxaloacetate decarboxylase
Q88N19	0	0	0	0	0	1.53963e+07	PP_1397	Uncharacterized protein
Q88N18	0	0	0	51060000	0	0	PP_1398	Uncharacterized protein
Q88N16	0	0	0	0	0	4.18067e+06	PP_1400	Dicarboxylate MFS transporter
Q88N15	0	1.00913e+07	0	0	0	0	PP_1401	C4-dicarboxylate transport transcriptional regulatory protein
Q88N13	115691000	1.11264e+08	119127000	2.09003e+08	1.77667e+08	220740000	PP_1403	Periplasmic beta-glucosidase
Q88N06	214980000	5.39957e+07	1.17208e+08	4.74757e+07	25048000	35789000	PP_1412	Enoyl-CoA hydratase/isomerase family protein
Q88N05	96254000	2.75177e+08	1.03088e+08	9.33323e+07	1.45387e+08	112480000	PP_1413	Uracil-DNA glycosylase
Q88MZ8	63072000	2.29457e+07	1.04133e+07	0	18082000	0	PP_1420	Transcriptional regulatory protein TctD
Q88MZ5	4.40847e+08	4.57743e+08	504610000	7.21233e+08	486570000	5.77507e+08	PP_1423	tRNA-modifying protein YgfZ
Q88MZ4	0	0	0	0	0	2.01343e+07	PP_1424	Uncharacterized protein PP_1424
Q88MZ2	325350000	636930000	4.42783e+08	4.87187e+08	459510000	4.44617e+08	PP_1426	L-aspartate oxidase
Q88MZ1	2.07703e+08	2.40857e+08	3.34473e+08	2.67377e+08	138030000	1.91947e+08	PP_1427	RNA polymerase sigma factor
Q88MZ0	2.04777e+07	0	0	0	0	0	PP_1428	Sigma factor algU negative regulatory protein MucA
Q88MY9	1.20903e+08	9.88767e+07	2.23363e+08	8.18253e+07	7.19423e+07	8.20267e+07	PP_1429	Sigma factor algU regulatory protein AlgN
Q88MY8	1102333333	2441866667	1418400000	1063400000	1227233333	1176366667	PP_1430	Alginate biosynthesis negative regulator, serine protease AlgY
Q88MY7	5.58673e+08	523090000	6.31587e+08	9.61287e+08	920270000	9.77293e+08	PP_1431	Elongation factor 4
Q88MY6	2.96807e+07	1.32807e+08	7.95997e+07	137000000	7.24233e+07	1.47263e+08	PP_1432	Signal peptidase I
Q88MY5	9.39197e+07	1.03984e+08	101666000	1.75213e+08	1.54993e+08	143510000	PP_1433	Ribonuclease 3
Q88MY4	1.91777e+08	2.15973e+08	2.17113e+08	2.73443e+08	2.83383e+08	2.89913e+08	PP_1434	GTPase Era
Q88MX5	4.98633e+08	4.79323e+08	6.31947e+08	9.87597e+08	559120000	8.09537e+08	PP_1443	Lon protease
Q88MX4	7.73537e+08	4.76253e+08	5.11473e+08	372600000	3.24977e+08	3.90097e+08	PP_1444	Glucose dehydrogenase (Pyrroloquinoline-quinone)
Q88MW7	0	0	0	0	0	3560000	PP_1451	Uncharacterized protein
Q88MW5	0	0	0	0	11661000	0	PP_1453	MutT/nudix family protein
Q88MW1	1279666667	9.85637e+08	1413733333	2213666667	1412466667	1928433333	PP_1457	Phosphoribosylglycinamide formyltransferase 2
Q88MW0	7.40537e+07	86230000	72158000	1.04056e+08	3.95923e+07	8.21797e+07	PP_1458	Metabolite-proton symporter
Q88MV9	94691000	84775000	8.05503e+07	27860000	40460000	95981000	PP_1459	CBS domain protein
Q88MV7	8.56087e+08	964100000	839160000	1662700000	1085700000	1326733333	PP_1461	Signal recognition particle protein
Q88MV6	4206633333	8516266667	7670266667	16267666667	15853666667	14399000000	PP_1462	30S ribosomal protein S16
Q88MV5	26450000	3.02093e+07	0	67369000	9.85413e+07	108359000	PP_1463	Ribosome maturation factor RimM
Q88MV3	7540566667	9769566667	10462966667	20398000000	21892666667	18132666667	PP_1465	50S ribosomal protein L19
Q88MU9	0	0	0	12052000	0	0	PP_1469	Thiol:disulfide interchange protein DsbC
Q88MU8	1611500000	2026266667	1794466667	2884666667	2799366667	3036900000	PP_1470	Homoserine dehydrogenase
Q88MU7	2140200000	2382633333	2161766667	3481233333	2929966667	3227466667	PP_1471	Threonine synthase
Q88MU3	2.91617e+08	1.92167e+08	169180000	1.19223e+08	9.42093e+07	1.53483e+08	PP_1475	CAIB/BAIF family protein
Q88MU2	43204000	5.65997e+07	58030000	4.69073e+07	6.12613e+07	6.12103e+07	PP_1476	Uncharacterized protein
Q88MU1	0	0	0	0	0	9.75667e+06	PP_1477	Single-stranded-DNA-specific exonuclease RecJ
Q88MU0	2641233333	1062133333	1979400000	878890000	9.15553e+08	879100000	PP_1478	Xenobiotic reductase, putative
Q88MT7	737540000	721600000	483550000	122160000	1.04444e+08	117030000	PP_1481	Betaine aldehyde dehydrogenase, putative
Q88MT4	9546000	0	0	0	0	0	PP_1484	Polyamine ABC transporter, ATP-binding protein
Q88MT2	1138050000	523500000	6.24053e+08	236830000	2.95367e+08	2.62897e+08	PP_1486	Polyamine ABC transporter, periplasmic polyamine-binding protein
Q88MT1	0	6.01407e+07	53373000	53477000	5.34363e+07	50161000	PP_1487	Uncharacterized protein
Q88MT0	3.58147e+08	193360000	260650000	1.65483e+08	8.90653e+07	1.46327e+08	PP_1488	Methyl-accepting chemotaxis transducer
Q88MS6	23373000	0	25888000	0	0	0	PP_1492	Sensor histidine kinase/response regulator
Q88MS5	6.05133e+06	0	0	0	0	0	PP_1493	Chemotaxis response regulator protein-glutamate methylesterase of group 3 operon
Q88MS4	274720000	2.00107e+08	182020000	121040000	104742000	1.23127e+08	PP_1494	Response regulator/GGDEF domain protein
Q88MS3	1653400000	2303566667	2510933333	4689166667	4305900000	4480400000	PP_1496	Lysine--tRNA ligase
Q88MS0	167460000	1.20787e+08	3.62033e+07	31007000	2.46483e+07	2.26997e+07	PP_1499	Uncharacterized protein
Q88MR9	3.03153e+06	0	0	0	0	0	PP_1500	Lipoprotein, putative
Q88MR8	0	0	0	3.32023e+07	0	0	PP_1501	Uncharacterized protein
Q88MR7	1071173333	5.22533e+08	2836833333	926430000	621170000	9.25837e+08	PP_1502	OmpA family protein
Q88MR6	1.06787e+08	4.13597e+07	3.29687e+08	5.37647e+07	6.66917e+07	6.05453e+07	PP_1503	Uncharacterized protein
Q88MR5	1.17723e+07	0	0	0	0	0	PP_1504	Uncharacterized protein
Q88MR4	1089933333	1025490000	645040000	2.56187e+08	2.14937e+08	246420000	PP_1505	Phosphoenolpyruvate carboxylase
P0A136	10401666667	8161900000	11673333333	5743666667	5327233333	5889966667	PP_1506	Adenylate kinase
Q88MR3	0	0	1.22817e+07	0	2.77127e+07	0	PP_1507	Uncharacterized protein
Q88MR0	1.08699e+08	31661000	6.37787e+07	4.10507e+07	2.13677e+07	27215000	PP_1510	Carboxyvinyl-carboxyphosphonate phosphorylmutase, putative
Q88MQ7	0	0	0	0	0	1.45467e+07	PP_1513	Ribosomal RNA small subunit methyltransferase J
Q88MQ4	45638000	38819000	4.29227e+07	34452000	4.50813e+07	5.02813e+07	PP_1516	RND membrane fusion protein
Q88MQ3	7.34333e+06	0	0	0	0	0	PP_1517	RND efflux transporter
Q88MQ2	443800000	7.87287e+08	617870000	9.90753e+08	658660000	9.49147e+08	PP_1518	Uncharacterized protein
Q88MQ1	0	0	0	0	0	1.76453e+07	PP_1519	Lipoprotein, putative
Q88MP8	541120000	2930133333	1893466667	2295533333	2035733333	1783300000	PP_1522	Cold shock protein CspA
Q88MP5	17207000	14419000	7.45033e+06	4.49413e+07	63260000	5.94807e+07	PP_1525	Succinyl-diaminopimelate desuccinylase
Q88MP4	0	0	0	0	0	10921000	PP_1526	Beta-(1-3)-glucosyl transferase, putative
Q88MP3	0	0	2124300	0	0	0	PP_1527	ThiF family protein
Q88MP1	1133733333	1303433333	1662766667	3434966667	2326833333	3035133333	PP_1530	2,3,4,5-tetrahydropyridine-2,6-dicarboxylate N-succinyltransferase
Q88MP0	3.36737e+07	26266000	2.04933e+07	4.93177e+07	2.09833e+07	3.28947e+07	PP_1531	Uncharacterized protein
Q88MM3	0	1.20367e+07	1.74387e+07	1.79973e+07	3.76267e+07	23736000	PP_1548	Uncharacterized protein
Q88MM2	132940000	130220000	100980000	7.51117e+07	6.74973e+07	6.93233e+07	PP_1549	Transcriptional regulator, Cro/CI family
Q88MJ5	7.87917e+07	52894000	97010000	36834000	1.78447e+07	7.94923e+07	PP_1576	Immunity protein, putative
Q88MI6	0	0	0	0	0	16731000	PP_1585	Antidote protein, putative
Q88MI3	8.06313e+08	1181000000	886130000	1277133333	1026380000	1098746667	PP_1588	Aminotransferase, class I
Q88MI2	384500000	3.26803e+08	1.93293e+08	1.33897e+08	1.12513e+08	1.39533e+08	PP_1589	Bifunctional uridylyltransferase/uridylyl-removing enzyme
Q88MI1	4.85267e+08	417500000	4.19487e+08	4.82517e+08	4.61773e+08	418800000	PP_1590	Methionine aminopeptidase
Q88MI0	6708233333	8244666667	9314800000	14687000000	16272000000	13567333333	PP_1591	30S ribosomal protein S2
Q88MH9	9889700000	14525666667	16299333333	22763666667	26836333333	23912666667	PP_1592	Elongation factor Ts
Q88MH8	3.16753e+08	6.09597e+08	3.87623e+08	9.36297e+08	908800000	9.13223e+08	PP_1593	Uridylate kinase
Q88MH7	3817766667	6007633333	4885233333	5061366667	5748933333	6059433333	PP_1594	Ribosome-recycling factor
Q88MH6	41189000	4.65147e+07	50085000	37220000	4.92437e+07	5.06297e+07	PP_1595	Ditrans,polycis-undecaprenyl-diphosphate synthase ((2E,6E)-farnesyl-diphosphate specific)
Q88MH4	0	0	0	1.06283e+07	0	0	PP_1597	1-deoxy-D-xylulose 5-phosphate reductoisomerase
Q88MH3	0	0	0	8017000	0	0	PP_1598	Zinc metalloprotease
Q88MH2	1666066667	1682333333	1353033333	2243133333	1950800000	1788900000	PP_1599	Outer membrane protein assembly factor BamA
Q88MH1	5223366667	4462033333	4538866667	3940133333	4718600000	4420766667	PP_1600	Outer membrane protein OmpH
Q88MH0	108915000	1.58233e+08	147180000	1.98313e+08	1.16673e+08	1.10898e+08	PP_1601	UDP-3-O-acylglucosamine N-acyltransferase
Q88MG9	6.19937e+07	2.88467e+07	0	6.56393e+07	0	0	PP_1602	3-hydroxyacyl-[acyl-carrier-protein] dehydratase FabZ
Q88MG8	9.99907e+07	1.20413e+08	117418000	150590000	138470000	1.28027e+08	PP_1603	Acyl-[acyl-carrier-protein]--UDP-N-acetylglucosamine O-acyltransferase
Q88MG5	117069000	1.06535e+08	1.05042e+08	2.22593e+08	1.86217e+08	217480000	PP_1606	DNA-directed DNA polymerase
Q88MG4	1774100000	1437133333	1671566667	1879100000	1343600000	1798666667	PP_1607	Acetyl-coenzyme A carboxylase carboxyl transferase subunit alpha
Q88MG1	2874433333	2384566667	2611600000	3101666667	3338566667	3441500000	PP_1610	CTP synthase
Q88MG0	386560000	2.97887e+08	277350000	4.31337e+08	3.31817e+08	405230000	PP_1611	2-dehydro-3-deoxyphosphooctonate aldolase 1
Q88MF9	4017333333	4886766667	5561933333	8425966667	7667866667	8115866667	PP_1612	Enolase
Q88MF8	8.24617e+07	40055000	5.22733e+07	36049000	41191000	4.84857e+07	PP_1613	Cell division protein FtsB
Q88MF5	3.57267e+08	518570000	2.65697e+08	341250000	4.33583e+08	3.21823e+08	PP_1616	D-isomer specific 2-hydroxyacid dehydrogenase family protein
Q88MF4	5.81833e+07	7.65157e+07	0	0	0	0	PP_1617	Esterase, putative
Q88MF2	22829000	3.23687e+07	43531000	4.63017e+07	5.05263e+07	43792000	PP_1619	tRNA pseudouridine synthase D
Q88MF1	0	0	0	0	0	20192000	PP_1620	5'-nucleotidase SurE
Q88ME9	6.48083e+07	5.65083e+07	8.22663e+07	9.10593e+07	6.67537e+07	8.23993e+07	PP_1622	Lipoprotein NlpD
Q88ME8	1438900000	1470066667	967260000	3.96933e+08	2.78523e+08	448400000	PP_1623	RNA polymerase sigma factor RpoS
P0A122	3.92253e+08	3.91017e+08	4.15403e+08	710360000	712320000	6.90793e+08	PP_1625	Ferredoxin 1
Q88ME7	6.95833e+07	6.87667e+07	1.03715e+08	2.66997e+08	171750000	162850000	PP_1626	DNA mismatch repair protein MutS
Q88ME4	624350000	1084566667	8.68267e+08	1467300000	1516533333	1125740000	PP_1629	Protein RecA
Q88ME2	7.44337e+07	58421000	84626000	121878000	8.84333e+07	1.03818e+08	PP_1631	Uncharacterized protein
Q88ME0	277120000	282210000	5.73703e+08	3.21137e+08	225070000	481600000	PP_1633	Uncharacterized protein
Q88MD8	2.49633e+08	2.28367e+08	1.59407e+08	2.10783e+08	2.05057e+08	1.98163e+08	PP_1635	DNA-binding response regulator
Q88MD5	6.54247e+08	1443266667	1471800000	3203333333	4287366667	3388366667	PP_1638	Ferredoxin--NADP reductase
Q88MD2	194580000	2.89027e+08	341460000	6.03133e+08	5.17973e+08	5.51587e+08	PP_1641	tRNA 2-thiocytidine biosynthesis protein TtcA
Q88MC9	9.50927e+07	9.29233e+07	139241000	69823000	7.52247e+07	120326000	PP_1644	NAD(P)H dehydrogenase (quinone)
Q88MC8	1.41287e+08	199940000	1.81647e+08	3.05103e+08	2.42717e+08	3.17557e+08	PP_1645	Arsenate reductase
Q88MC7	2.22203e+08	1.46817e+08	200860000	2.75867e+08	1.71393e+08	1.76417e+08	PP_1646	Thioredoxin, putative
Q88MC5	7.68623e+07	88288000	8.21503e+07	9.21687e+07	1.26693e+08	1.21436e+08	PP_1648	Uncharacterized protein
Q88MC4	1.2149e+08	1.03835e+08	7.35533e+07	8.28647e+07	5.20907e+07	2.51537e+07	PP_1649	D-lactate dehydrogenase
Q88MC3	33849000	20701000	0	0	0	0	PP_1650	Histidine kinase
Q88MC0	4.30907e+07	0	0	1.38497e+08	6.21477e+07	3.11903e+07	PP_1654	Cysteine synthase
Q88MB9	8.46567e+06	0	0	0	0	0	PP_1655	23S rRNA (uracil(1939)-C(5))-methyltransferase RlmD
Q88MB8	4.59353e+08	2.63857e+08	3.48283e+08	4.86553e+08	3.20787e+08	4.09593e+08	PP_1656	GTP pyrophosphokinase
Q88MB6	8.47173e+07	1.30921e+08	1.82733e+08	1.41417e+08	1.65987e+08	2.31423e+08	PP_1658	Uncharacterized protein
Q88MB5	1983266667	6.03447e+08	1115533333	698860000	372670000	5.27293e+08	PP_1659	Uncharacterized protein
Q88MB4	0	0	1.83687e+07	0	0	0	PP_1660	Uncharacterized protein
Q88MB3	1676966667	532380000	855460000	5.43447e+08	2.44157e+08	441820000	PP_1661	Dehydrogenase subunit, putative
Q88MB1	4.54673e+08	3.42877e+08	7.77163e+08	480960000	2.09117e+08	5.87177e+08	PP_1663	Uncharacterized protein
Q88MB0	6.91443e+07	1.08996e+08	1.16853e+08	1.27027e+08	77000000	99120000	PP_1664	Phosphoribosylglycinamide formyltransferase
Q88MA9	1111833333	7.53623e+08	1139933333	1662333333	775830000	1478933333	PP_1665	Phosphoribosylformylglycinamidine cyclo-ligase
Q88MA8	1.1452e+08	1.1712e+08	7.57243e+07	68508000	7.73293e+07	54023000	PP_1666	Uncharacterized protein
Q88MA2	0	5.15133e+07	2.38277e+07	1.35603e+07	4.48107e+07	0	PP_1672	Cob(I)alamin adenosyltransferase
Q88M97	0	0	0	134887	0	0	PP_1677	Cobyric acid synthase
Q88M88	521190000	9.51423e+07	2.62623e+08	5.59857e+07	6.11013e+07	5.69037e+07	PP_1686	Glutathione peroxidase
Q88M74	0	0	2.38823e+06	0	0	0	PP_1700	Acyltransferase
Q88M72	521600000	5.81457e+08	8.11203e+08	1019266667	9.41357e+08	8.34823e+08	PP_1702	Recombination-associated protein RdgC
Q88M60	1539600000	1157433333	2785200000	9.61223e+08	8.90567e+08	1324506667	PP_1714	Peptidyl-prolyl cis-trans isomerase
Q88M58	0	4.30157e+07	2.66293e+07	2.53387e+07	0	0	PP_1716	Transcriptional regulator, Cro/CI family
Q88M55	3619533333	2371366667	2307300000	1640100000	1755233333	1689200000	PP_1719	Tail-specific protease prc
Q88M54	3.35893e+08	3.54413e+08	335810000	1.76047e+08	229300000	172980000	PP_1720	Alcohol dehydrogenase, zinc-containing
Q88M53	1.19918e+08	1.82333e+08	6.34883e+07	3.51467e+07	2.87013e+07	3.58353e+07	PP_1721	Hydrolase, haloacid dehalogenase-like family
Q88M52	0	1.96097e+06	0	0	0	0	PP_1722	ABC transporter, ATP-binding protein
Q88M48	3131100000	3361333333	2054066667	4.48833e+08	463240000	5.19307e+08	PP_1726	ABC transporter, periplasmic binding protein
Q88M44	3.36217e+08	2.55053e+08	1.86333e+08	3.97737e+08	415640000	4.06837e+08	PP_1730	Probable M18 family aminopeptidase 2
Q88M43	1.67593e+08	2.06207e+08	1.44197e+08	107234000	8.86847e+07	0	PP_1732	Cell division topological specificity factor
Q88M42	2210266667	2030933333	2444133333	1969166667	1772966667	1955066667	PP_1733	Site-determining protein
Q88M41	8.78167e+07	1.43487e+08	47420000	4.16167e+07	0	8.87633e+07	PP_1734	Probable septum site-determining protein MinC
Q88M40	1.96957e+06	0	0	0	0	0	PP_1735	Lipid A biosynthesis lauroyltransferase
Q88M37	47959000	4.27853e+07	8.92773e+07	2.78797e+07	0	2.03537e+07	PP_1738	Uncharacterized protein
Q88M34	4.20517e+08	1.0158e+08	9.99737e+07	6.19927e+07	7.04923e+07	6.22637e+07	PP_1741	Glycine betaine-binding protein, putative
Q88M33	0	0	0	0	3.67233e+06	0	PP_1742	Uncharacterized protein
Q88M32	5.22853e+07	1189566667	3.82527e+08	4.51843e+07	4.10503e+07	5.23077e+07	PP_1743	Phenylacetic acid transporter PhaJ
Q88M27	1.32133e+08	0	1.58203e+08	0	4.40067e+07	29508000	PP_1748	Uncharacterized protein
Q88M26	0	0	0	0	0	3.50533e+06	PP_1749	Acetyltransferase, GNAT family
Q88M25	9.74367e+06	3.68747e+07	1.48565e+08	0	14584000	1.13937e+07	PP_1750	Asparagine synthetase
Q88M23	8.80227e+08	6.90707e+08	639570000	3.51627e+08	3.70327e+08	313570000	PP_1752	Uncharacterized protein
Q88M20	1560233333	1182333333	1846466667	4.10653e+08	2.48573e+08	4.53867e+08	PP_1755	Fumarate hydratase class II
Q88M19	7.87423e+08	9.21157e+08	1146433333	1006816667	654280000	935700000	PP_1756	Uncharacterized protein
Q88M18	1.27033e+08	121880000	1.72417e+08	5.09567e+07	4.42933e+07	48370000	PP_1757	BolA protein
Q88M17	5.23137e+07	6.80453e+07	1.73939e+08	289510000	1.84287e+08	2.86367e+08	PP_1758	UPF0176 protein PP_1758
Q88M16	0	0	0	0	0	4.42567e+06	PP_1759	Uncharacterized protein
Q88M14	3.20197e+07	0	0	0	0	0	PP_1761	Sensory box protein/GGDEF family protein
Q88M12	2.92623e+08	1.79943e+08	243230000	3.09397e+08	109864000	2.39107e+08	PP_1763	Oxidoreductase, short chain dehydrogenase/reductase family
Q88M11	3.55083e+08	422280000	5.05377e+08	514120000	2.13813e+08	4.59343e+08	PP_1764	Hydrolase, haloacid dehalogenase-like family
Q88M10	2.99597e+08	2.71327e+08	2.73527e+08	3.92927e+08	204050000	3.35197e+08	PP_1765	Ubiquinone biosynthesis O-methyltransferase
Q88M08	1948300000	1108900000	1948133333	3160466667	1371000000	2722800000	PP_1767	DNA gyrase subunit A
Q88M07	1225500000	1274900000	1577866667	2828566667	1744733333	2481100000	PP_1768	Phosphoserine aminotransferase
Q88M06	9.58797e+08	6.58973e+08	843880000	1226333333	920740000	1258200000	PP_1769	Chorismate mutase/prephenate dehydratase
Q88M05	1509300000	1253333333	1460966667	2093166667	1545000000	1658366667	PP_1770	3-phosphoshikimate 1-carboxyvinyltransferase
Q88M04	4.04347e+08	3.86673e+08	4.59223e+08	8.03697e+08	5.51417e+08	6.99197e+08	PP_1771	Cytidylate kinase
Q88M03	18125333333	23851000000	28464666667	37859333333	42368333333	39949000000	PP_1772	30S ribosomal protein S1
P0A128	1076386667	5.22137e+08	657930000	2.45503e+08	2.49787e+08	4.12743e+08	PP_1773	Integration host factor subunit beta
Q88M00	4.22027e+08	316500000	3.89867e+08	7.22947e+08	4.81677e+08	5.70473e+08	PP_1776	Mannose-6-phosphate isomerase/mannose-1-phosphate guanylyltransferase
Q88LZ9	9.10457e+07	125030000	1.75733e+08	410620000	273590000	4.52923e+08	PP_1777	Phosphomannomutase
Q88LZ7	87195000	58638000	1.15693e+08	2.43893e+08	1.27683e+08	2.33183e+08	PP_1779	Lipopolysaccharide ABC export system, ATP-binding protein
Q88LZ6	280810000	219790000	353730000	4.76977e+08	2.93557e+08	4.63323e+08	PP_1780	Mannosyltransferase, putative
Q88LZ4	67732000	284380000	1.84967e+08	7.45073e+08	6.05443e+08	5.26897e+08	PP_1782	dTDP-4-dehydrorhamnose 3,5-epimerase
Q88LZ3	5.78957e+08	1463933333	1220566667	2600500000	2508600000	2311566667	PP_1783	Glucose-1-phosphate thymidylyltransferase
Q88LZ2	130861000	158450000	1.37637e+08	3.55853e+08	4.02793e+08	3.14363e+08	PP_1784	dTDP-4-dehydrorhamnose reductase
Q88LZ1	5.93317e+08	1466900000	1311866667	2866300000	3274000000	2386966667	PP_1785	dTDP-glucose 4,6-dehydratase
Q88LZ0	1185166667	2251900000	1829600000	4591766667	4694800000	4328033333	PP_1786	Glycosyl transferase, putative
Q88LY9	0	0	0	0	7529000	0	PP_1787	Uncharacterized protein
Q88LY8	7.64537e+07	1.20933e+08	1.34993e+08	4.69603e+08	1.99147e+08	4.17377e+08	PP_1788	Uncharacterized protein
Q88LY7	44966000	5.95483e+07	1.15515e+08	5.90797e+08	358560000	492680000	PP_1789	Hydrolase, haloacid dehalogenase-like family
Q88LY6	194910000	148930000	3.30743e+08	1.91767e+08	121646000	321910000	PP_1790	Acylneuraminate cytidylyltransferase, putative
Q88LY5	4.50297e+08	1006983333	9.41043e+08	2081200000	1071546667	1474633333	PP_1791	Aldolase/synthase, putative
Q88LY4	3.05157e+08	4.63903e+08	5.53977e+08	1118383333	7.18243e+08	1123000000	PP_1792	Glycosyl transferase, group 2 family protein
Q88LY3	3.64557e+07	46192000	6.47083e+07	1.22106e+08	6.72987e+07	184220000	PP_1793	Glycosyl transferase, group 2 family protein
Q88LY2	56756000	8.76173e+07	9.08673e+07	1023796667	814570000	9.29837e+08	PP_1794	Uncharacterized protein
Q88LY1	7.95383e+07	73862000	139985000	7.90673e+08	4.27023e+08	5.63723e+08	PP_1795	Uncharacterized protein
Q88LX8	2933600000	3388900000	3520300000	4760166667	4469600000	4380633333	PP_1799	GDP-mannose 4,6-dehydratase
Q88LX7	276030000	353930000	2.88747e+08	3.53313e+08	3.45623e+08	3.13083e+08	PP_1800	Oxidoreductase Rmd
Q88LX6	9.88087e+07	62371000	7.95793e+07	5.23203e+07	5.59113e+07	5.95633e+07	PP_1801	Glycosyl transferase WbpY
Q88LX5	0	0	0	0	1.88827e+07	0	PP_1802	Glycosyl transferase WbpZ
Q88LX1	0	1.59003e+07	0	0	0	0	PP_1806	Arabinose 5-phosphate isomerase
Q88LX0	4.70423e+08	5.60867e+08	583140000	5.00107e+08	442560000	6.17433e+08	PP_1807	2-dehydro-3-deoxyphosphooctonate aldolase 2
Q88LW9	0	0	0	0	0	64290000	PP_1808	Glucose-6-phosphate isomerase 1
Q88LW3	8.29673e+07	15668800	45231000	1.00121e+07	1.59797e+07	1.70059e+07	PP_1814	Uncharacterized protein
Q88LW2	1.88344e+08	98321000	1.43123e+08	376960000	2.85567e+08	3.14527e+08	PP_1815	Orotidine 5'-phosphate decarboxylase
Q88LW1	3.07947e+08	2.34813e+08	1.99177e+08	156200000	1.37927e+08	1.05296e+08	PP_1816	Alcohol dehydrogenase, zinc-containing
Q88LV8	2.91267e+08	1.30868e+08	40705000	3.82133e+07	21182000	29590000	PP_1819	Methyl-accepting chemotaxis transducer
Q88LV5	0	0	0	0	0	9092000	PP_1822	Uncharacterized protein
Q88LV4	3.85737e+08	3.77583e+08	2.41027e+08	225560000	308290000	244170000	PP_1823	GTP cyclohydrolase 1 1
Q88LV3	38375000	5.47233e+07	1.58593e+07	8.25143e+07	43974000	94172000	PP_1824	Smr domain protein
Q88LV1	90845000	1.34403e+08	1.02362e+08	1.59103e+08	1.64457e+08	1.2117e+08	PP_1826	Hydrolase, isochorismatase family
Q88LV0	6.95417e+07	68507000	68475000	1.46763e+08	87501000	8.88017e+07	PP_1827	50S ribosomal protein L3 glutamine methyltransferase
Q88LU7	4.09017e+08	409250000	386820000	4.41517e+08	332850000	4.75987e+08	PP_1830	Chorismate synthase
Q88LU6	0	0	0	0	3093100	0	PP_1831	Membrane protein, putative
Q88LU5	2.61643e+08	2.61773e+08	3.05433e+08	2.20987e+08	1.36173e+08	2.38657e+08	PP_1832	1,2-dihydroxy-3-keto-5-methylthiopentene dioxygenase
Q88LU3	0	0	0	0	14763000	0	PP_1834	Ankyrin domain protein
Q88LT9	3.21167e+08	8.76117e+08	384580000	4.92307e+08	4.95217e+08	4.48753e+08	PP_1838	Uncharacterized protein
Q88LT5	4.99457e+08	4.29067e+08	3.87793e+08	131620000	2.18683e+08	152960000	PP_1842	Glutamine amidotransferase, class I
Q88LS1	0	0	0	4.19433e+06	0	0	PP_1857	Uncharacterized protein
Q88LS0	5133700000	6045833333	6908800000	7511266667	8651400000	7831133333	PP_1858	Elongation factor P
Q88LR9	6106400000	1597633333	1440266667	5.83787e+08	6.80673e+08	7.59813e+08	PP_1859	Organic hydroperoxide resistance protein
Q88LR3	8.23473e+07	9.41023e+07	9.05713e+07	1.43067e+08	1.04748e+08	1.21113e+08	PP_1866	Phospho-2-dehydro-3-deoxyheptonate aldolase, class II
Q88LR1	8.53267e+08	1525066667	1374166667	3775866667	3049700000	3228566667	PP_1868	ATP-dependent RNA helicase DeaD
Q88LQ9	0	0	0	0	0	5149000	PP_1870	Thiopurine S-methyltransferase
Q88LQ7	2.75797e+08	2.54667e+08	2.59003e+08	4.97063e+08	4.46143e+08	408940000	PP_1872	Aminotransferase, class I
Q88LQ6	103336000	119480000	90687000	3.25587e+07	70280000	44730000	PP_1873	Peptide methionine sulfoxide reductase MsrB
Q88LQ5	2.85257e+08	349960000	2.28367e+08	1.27607e+08	1.36613e+08	116369000	PP_1874	Glutathione peroxidase
Q88LQ3	3.35163e+08	427080000	3.90243e+08	4.86923e+08	561090000	5.09837e+08	PP_1876	Uncharacterized protein
Q88LQ2	0	0	0	0	0	7949000	PP_1877	GAF domain protein
Q88LQ1	6.23847e+07	9.69343e+07	4.51253e+07	11058000	29874000	9.69133e+06	PP_1878	Uncharacterized protein
Q88LN6	1155280000	5.41443e+08	7.17657e+08	1.33117e+08	8.59853e+07	121424000	PP_1893	Acyl-CoA dehydrogenase, putative
Q88LN5	0	0	0	9442000	0	0	PP_1894	Glutathione S-transferase family protein
Q88LN4	6.84867e+07	1.11257e+08	94675000	1.41337e+08	1.20757e+08	1.45757e+08	PP_1895	ABC transporter, ATP-binding protein
Q88LN0	0	0	0	0	0	1.12367e+07	PP_1899	ExbD/TolR family protein
Q88LM8	459430000	4.23517e+08	438920000	829220000	492260000	6.00693e+08	PP_1901	UPF0434 protein PP_1901
Q88LM7	494450000	358770000	4.92583e+08	725180000	572030000	7.01707e+08	PP_1902	3-deoxy-manno-octulosonate cytidylyltransferase
Q88LM6	53701000	17271000	5.33683e+07	6.10213e+07	5.11827e+07	6.64377e+07	PP_1903	Protein-tyrosine-phosphatase
Q88LM5	0	0	0	0	0	7.77467e+06	PP_1904	UDP-N-acetylenolpyruvoylglucosamine reductase
Q88LM4	2860100000	3661433333	3601533333	5041333333	4801500000	4452900000	PP_1905	Ribonuclease E
Q88LM3	0	0	0	8.97567e+06	0	0	PP_1907	Hydrolase, haloacid dehalogenase-like family
Q88LM2	1.73493e+08	1.41333e+08	214580000	2.65347e+08	141950000	178121000	PP_1908	Peptidase, putative
Q88LM1	0	0	1.01353e+06	0	0	0	PP_1909	Maf-like protein PP_1909
Q88LM0	2.16977e+08	2.41213e+08	2.48723e+08	5.05743e+08	4.15437e+08	3.98767e+08	PP_1910	Uncharacterized protein
Q88LL9	3261600000	4107366667	4493000000	3812466667	6311300000	5776466667	PP_1911	50S ribosomal protein L32
Q88LL7	1178726667	1481266667	1252213333	1062490000	996300000	1075266667	PP_1913	Malonyl CoA-acyl carrier protein transacylase
Q88LL6	4623766667	4423066667	3823800000	4347500000	3460933333	3734366667	PP_1914	3-oxoacyl-(Acyl-carrier-protein) reductase
Q88LL5	6880533333	8460566667	8318333333	6023966667	7748466667	8894833333	PP_1915	Acyl carrier protein
Q88LL4	1.96017e+08	1.82043e+08	175710000	170140000	1.43437e+08	150710000	PP_1916	3-oxoacyl-[acyl-carrier-protein] synthase 2
Q88LK9	0	0	0	0	0	5.85133e+06	PP_1922	Uncharacterized protein
Q88LJ1	64092000	8.35987e+07	7.20987e+07	83238000	59259000	48457000	PP_1941	Uncharacterized protein
Q88LJ0	1.23177e+08	243950000	88610000	89080000	23048000	0	PP_1942	Transcriptional regulator, LysR family
Q88LI6	2.34767e+07	86191000	4.90667e+07	1.90103e+07	3.67377e+07	21914000	PP_1946	Oxidoreductase, short chain dehydrogenase/reductase family
Q88LH4	3.14473e+07	1.01531e+08	0	0	0	0	PP_1958	Uncharacterized protein
Q88LH3	233360000	0	0	0	0	0	PP_1959	Uncharacterized protein
Q88LG8	95989000	6.80523e+07	66468000	0	71170000	42388000	PP_1964	Deoxynucleotide monophosphate kinase, putative
Q88LG6	5.72943e+07	6.19543e+07	55588000	6.27417e+07	7.20667e+07	5.98577e+07	PP_1967	Deoxyribonuclease, TatD family
Q88LG5	2.76167e+08	2.19027e+08	220970000	1.21603e+08	201460000	1.82087e+08	PP_1968	Transcriptional regulator, TetR family
Q88LG3	4.50023e+07	1.78597e+07	2.04023e+07	1.66253e+07	15897000	1.73977e+07	PP_1970	Lipoprotein, putative
Q88LG2	2.49347e+08	2.37963e+08	8.21443e+07	58790000	61144000	34377000	PP_1971	Uncharacterized protein
Q88LG1	3156000000	1667633333	2492000000	5943000000	2898433333	4801900000	PP_1972	Aromatic-amino-acid aminotransferase
Q88LF9	0	6.20467e+06	0	0	0	0	PP_1974	UvrABC system protein B
Q88LF6	8.87507e+08	9.48117e+08	8.65517e+08	1750733333	1381633333	1414400000	PP_1977	Glutamate--tRNA ligase
Q88LF3	1.73503e+07	0	0	0	0	0	PP_1980	Uncharacterized protein
Q88LF1	1.07181e+08	2.33367e+08	300030000	9.74297e+08	559810000	1086966667	PP_1982	Heat-shock protein IbpA
Q88LF0	5.73937e+08	3.04297e+08	175680000	9.56413e+07	1.07238e+08	9.74217e+07	PP_1983	Sensory box protein
Q88LE8	1117433333	2026266667	2255766667	4532500000	4072566667	4116200000	PP_1985	3-isopropylmalate dehydratase large subunit
Q88LE7	7.68033e+08	1405966667	1584400000	3958666667	2649800000	2812533333	PP_1986	3-isopropylmalate dehydratase small subunit
Q88LE6	131379000	2.80193e+08	2.30737e+08	520960000	2.71417e+08	4.15627e+08	PP_1987	Methlytransferase, UbiE/COQ5 family
Q88LE5	1278000000	2096633333	2049700000	4372966667	3747333333	3715633333	PP_1988	3-isopropylmalate dehydrogenase
Q88LE4	3720400000	3694100000	4056900000	6128933333	5480933333	5637033333	PP_1989	Aspartate-semialdehyde dehydrogenase
Q88LE2	5.12343e+07	2.11713e+08	6.63933e+07	166069000	4.75887e+08	1.89283e+08	PP_1992	Semialdehyde dehydrogenase family protein
Q88LE1	2265766667	1940100000	1428066667	1301833333	1153133333	1163766667	PP_1993	Uncharacterized protein
Q88LE0	0	0	0	0	0	9.46067e+06	PP_1995	N-(5'-phosphoribosyl)anthranilate isomerase
Q88LD9	1341700000	1479966667	1567866667	1984033333	1069210000	1566066667	PP_1996	Acetyl-coenzyme A carboxylase carboxyl transferase subunit beta
Q88LD8	1.72677e+08	181140000	2.06053e+08	2.17297e+08	1.58177e+08	1.87827e+08	PP_1997	Folylpolyglutamate synthetase
Q88LD7	4.97133e+07	1.89627e+07	1.01787e+07	20262000	8716000	0	PP_1998	Uncharacterized protein
Q88LD5	1183933333	1059726667	1329333333	1866433333	1780066667	1654133333	PP_2000	Amidophosphoribosyltransferase
Q88LD4	2.41667e+08	1.32297e+08	1.83363e+08	247310000	2.16877e+08	2.18853e+08	PP_2001	O-succinylhomoserine sulfhydrylase
Q88LC9	1772266667	1.58307e+08	2.99927e+08	7.92863e+08	103495000	609200000	PP_2006	Uncharacterized protein
Q88LC8	505990000	2.51397e+07	161511000	1.56753e+08	19999000	8.92107e+07	PP_2007	P-47-related protein
Q88LC7	22225000	114521000	9.17067e+07	3.98823e+07	0	4.87427e+07	PP_2008	2,4-dienoyl-CoA reductase FadH
Q88LC3	2.44583e+08	172250000	1.20027e+08	1.33993e+08	134150000	124164000	PP_2012	NAD kinase
Q88LC2	4.69567e+06	0	0	0	0	0	PP_2013	Uncharacterized protein
Q88LC0	5.95943e+07	7.42277e+07	69051000	246060000	1.72587e+08	187480000	PP_2015	Uncharacterized protein
Q88LB9	0	0	0	0	0	8.71367e+06	PP_2016	Uncharacterized protein
Q88LB8	1965200000	1472366667	1635433333	1616966667	1176533333	1293466667	PP_2017	Aminopeptidase N
Q88LB7	52898000	7.37033e+07	51130000	8.18167e+06	8558000	0	PP_2018	BNR domain protein
Q88LB6	1.50452e+08	1.63523e+08	107724000	32500000	2.88787e+07	2.70897e+07	PP_2019	Membrane protein, putative
Q88LB4	2.42113e+08	6.57923e+07	7.00183e+07	5.01303e+07	4.16517e+07	5.00047e+07	PP_2021	Uncharacterized protein
Q88LB1	1.93453e+08	2.88147e+08	1.82777e+08	4.06913e+08	347200000	3.67653e+08	PP_2024	Exonuclease SbcC
Q88LB0	0	15475000	2.02067e+07	0	2.31883e+07	0	PP_2025	Exonuclease SbcD
Q88L99	4.15717e+07	359230000	5.43573e+07	46893000	5.48233e+07	2.64107e+07	PP_2036	Dihydrodipicolinate synthase, putative
Q88L94	0	0	0	0	0	1.10497e+07	PP_2041	Transcriptional regulator, LysR family
Q88L88	9.84937e+08	2590400000	3404000000	4.45717e+07	2.72213e+08	2.63983e+08	PP_2047	3-hydroxyacyl-CoA dehydrogenase family protein
Q88L87	2732433333	7444533333	7391400000	1.69917e+08	1274966667	1250833333	PP_2048	Acyl-CoA dehydrogenase, putative
Q88L86	756750000	1694833333	1967066667	14546700	2.05557e+08	227980000	PP_2049	Alcohol dehydrogenase, iron-containing
Q88L84	2324533333	4824533333	5982333333	9.21783e+07	7.81783e+08	8.52127e+08	PP_2051	Acetyl-CoA acetyltransferase
Q88L83	0	0	0	0	22422000	0	PP_2052	Hydrolase, haloacid dehalogenase-like family
Q88L82	142800000	97429000	1.06712e+08	61121000	7.82447e+07	8.19113e+07	PP_2053	Uncharacterized protein
Q88L76	0	59669000	2.91677e+08	5.30733e+07	5.28377e+07	4.28323e+07	PP_2059	UPF0337 protein PP_2059
Q88L58	0	9.90437e+07	3.39807e+07	1.21584e+08	4.00653e+08	1.05041e+08	PP_2077	Diaminopimelate decarboxylase
Q88L55	1984300000	3367066667	1945766667	1429266667	1528066667	1237900000	PP_2080	Uncharacterized protein
Q88L54	2.53697e+08	2.92513e+08	231550000	2.86767e+08	207100000	2.75887e+08	PP_2081	Putative phosphoenolpyruvate synthase regulatory protein
Q88L53	8220500000	9038700000	10110133333	13070000000	8838000000	11515666667	PP_2082	Phosphoenolpyruvate synthase
Q88L51	1732666667	1393733333	1157366667	674110000	5.89223e+08	816170000	PP_2084	Putative 4-hydroxy-4-methyl-2-oxoglutarate aldolase
Q88L50	5.01067e+06	0	0	0	0	0	PP_2085	CmaX protein
Q88L49	28787000	0	0	1.11707e+07	0	0	PP_2086	CrfX protein
Q88L48	1.87073e+08	9.89517e+07	1.36117e+08	122910000	5.36443e+07	8.70723e+07	PP_2087	CmpX protein
Q88L47	0	0	0	0	0	1.63817e+07	PP_2088	RNA polymerase sigma factor SigX
Q88L46	26606666667	18154333333	42258000000	30116333333	19708000000	28919000000	PP_2089	Outer membrane protein OprF
Q88L40	593880000	449100000	4.26207e+08	7.53013e+08	6.95663e+08	6.80707e+08	PP_2095	Dihydroorotate dehydrogenase (quinone)
Q88L39	1.48117e+08	1.18873e+08	1.28203e+08	1.86913e+08	1.63773e+08	1.73403e+08	PP_2096	Ribosomal RNA large subunit methyltransferase K/L
Q88L37	227670000	9.05667e+07	2.07507e+08	1.02879e+08	1.30423e+08	220510000	PP_2098	D-alanyl-D-alanine carboxypeptidase
Q88L36	393320000	416640000	645730000	3.90237e+08	3.76433e+08	5.38643e+08	PP_2099	Uncharacterized protein
Q88L33	3.61503e+07	3.60507e+07	1.51053e+07	0	0	0	PP_2102	Deoxyguanosinetriphosphate triphosphohydrolase, putative
Q88L30	3244000000	3112766667	2957966667	1218100000	1279266667	1165576667	PP_2105	Uncharacterized protein
Q88L28	0	0	0	0	0	2.60597e+06	PP_2107	Uncharacterized protein
Q88L25	1290433333	8.87307e+08	461100000	621330000	255600000	4.95397e+08	PP_2111	Methyl-accepting chemotaxis transducer
Q88L24	1651800000	762900000	1405733333	5.41863e+08	966180000	545120000	PP_2112	Aconitate hydratase
Q88L20	7.06713e+07	1.00267e+08	5.46193e+07	117490000	147210000	9.33267e+07	PP_2117	Erythronate-4-phosphate dehydrogenase
Q88L19	0	1.86013e+07	0	0	0	0	PP_2118	Uncharacterized protein
Q88L16	113411000	1.29828e+08	6.78747e+08	5.85493e+07	0	1.03323e+08	PP_2121	Lipoprotein, putative
Q88L14	6.11943e+07	5.81403e+07	8.55957e+07	79533000	51796000	6.36257e+07	PP_2123	Molybdopterin biosynthesis MoeA protein
Q88L12	4.92467e+06	8541000	6.22683e+07	9326000	1.68573e+07	4.39233e+06	PP_2125	Probable lipid kinase YegS-like
Q88L09	2.36393e+08	2.22983e+08	105410000	3.57027e+08	1.41827e+08	2.50837e+08	PP_2128	Chemotaxis protein CheV
Q88L07	3.77297e+08	2.19547e+08	2.34383e+08	224830000	1.99783e+08	2.25553e+08	PP_2130	Soluble lytic transglycosylase, putative
Q88L06	2.52913e+08	4.07417e+08	4.47413e+08	829350000	6.43587e+08	7.21123e+08	PP_2131	ABC transporter, ATP-binding protein
Q88L05	1241866667	1328233333	8.69583e+08	4.33187e+08	7.34707e+08	407700000	PP_2132	Universal stress protein
Q88L02	754220000	4339433333	1558033333	663180000	1647633333	712800000	PP_2136	Fatty acid oxidation complex subunit alpha
Q88L01	5.95383e+08	2862700000	9.56767e+08	3.64143e+08	9.42823e+08	323010000	PP_2137	3-ketoacyl-CoA thiolase
Q88L00	9.81767e+07	2.35733e+08	1.30107e+08	147690000	1.94537e+08	135790000	PP_2138	Uncharacterized protein
Q88KZ9	1020126667	1064400000	1089543333	1742700000	1679033333	1573466667	PP_2139	DNA topoisomerase 1
Q88KZ8	3.23623e+07	196530000	7.52403e+07	104127000	9.96083e+07	8.47587e+07	PP_2140	Uncharacterized protein
P0A153	140490000	9.01043e+07	116310000	6.18693e+07	8.89383e+07	9.19843e+07	PP_2143	LexA repressor 1
Q88KZ5	7.10233e+07	81370000	1.00493e+08	1.33723e+08	1.18243e+08	9.08733e+07	PP_2144	Transcriptional regulator, TetR family
Q88KZ4	135110000	1.25909e+08	1.56997e+08	1.74117e+08	1.36347e+08	2.25917e+08	PP_2145	Beta-hexosaminidase
Q88KZ2	0	0	4747000	0	0	0	PP_2147	Uncharacterized protein
Q88KZ1	3.08847e+08	2.29007e+08	1.97783e+08	3.16013e+08	204300000	2.26487e+08	PP_2148	Transcription-repair-coupling factor
Q88KZ0	7432866667	9206200000	11444333333	12895666667	12828333333	12428333333	PP_2149	Glyceraldehyde-3-phosphate dehydrogenase
Q88KY8	1617266667	1620400000	1819200000	2630400000	2482666667	2219133333	PP_2151	Soluble pyridine nucleotide transhydrogenase
Q88KY7	753720000	528100000	5.10357e+08	4.07463e+08	3.46843e+08	4.27337e+08	PP_2152	Glycerophosphoryl diester phosphodiesterase, putative
Q88KY6	5.72773e+07	18528000	2.99883e+07	1.41183e+07	6.88367e+06	17556000	PP_2153	Uncharacterized protein
Q88KY4	3.26223e+07	1.14063e+07	24643000	2.00157e+07	22821000	2.20517e+07	PP_2155	Lipoprotein-releasing system ATP-binding protein LolD
Q88KY3	0	0	0	0	0	2.06877e+07	PP_2156	Lipoprotein releasing system, permease protein
Q88KY1	0	0	0	0	0	2.91493e+06	PP_2158	DNA-binding heavy metal response regulator
Q88KX9	1.22157e+08	9.94277e+07	123350000	144440000	1.36127e+08	1.63477e+08	PP_2160	NADPH-dependent 7-cyano-7-deazaguanine reductase
Q88KX8	1132233333	7.73043e+08	1394066667	9.53917e+08	8.52987e+08	855040000	PP_2161	Uncharacterized protein
Q88KX6	1.80313e+07	5.34147e+07	3.64823e+07	96961000	7.49617e+07	6.62163e+07	PP_2163	VacJ lipoprotein
Q88KX5	8.15767e+06	3.59733e+06	0	0	0	0	PP_2164	Uncharacterized protein
Q88KX4	166740000	5.74583e+07	4.88363e+07	0	3.59103e+07	1.55573e+07	PP_2165	Response regulator
Q88KX3	137750000	9.34603e+07	7.34553e+07	93749000	9.04227e+07	80806000	PP_2166	Anti-anti-sigma factor
Q88KX1	1297666667	1313700000	1989633333	1043433333	584560000	989760000	PP_2168	Transaldolase
Q88KX0	3.73233e+06	0	0	0	0	0	PP_2169	tRNA-dihydrouridine(20/20a) synthase
Q88KW7	27414000	3.87737e+07	3.87983e+08	50718000	23379000	1.63588e+08	PP_2172	Uncharacterized protein
Q88KW4	0	0	3.82833e+06	0	0	0	PP_2175	3-oxoacyl-(Acyl-carrier-protein) reductase, putative
Q88KV7	175260000	3.00723e+08	2.91777e+08	8.66763e+08	666420000	842560000	PP_2182	Uncharacterized protein
Q88KV6	0	0	0	3.14363e+06	0	0	PP_2183	Formate dehydrogenase, gamma subunit, putative
Q88KV5	0	1.67267e+07	0	0	0	0	PP_2184	Formate dehydrogenase, beta subunit, putative
Q88KV2	527760000	2.93283e+08	2.78297e+08	1.42023e+08	1.17993e+08	154800000	PP_2187	Universal stress protein family
Q88KV0	373380000	427420000	344980000	1.67433e+08	165360000	144890000	PP_2189	Uncharacterized protein
Q88KU4	50747000	7.07593e+07	3.66893e+07	0	0	0	PP_2195	Periplasmic polyamine-binding protein, putative
Q88KU3	6.66657e+07	6.42787e+07	3.71797e+07	0	0	12358000	PP_2196	Agmatinase
Q88KS6	2.72483e+08	1.31703e+08	9.34923e+07	61395000	5.09847e+07	4.90887e+07	PP_2213	Acyl-CoA ligase
Q88KS5	3.22537e+07	0	6.53867e+06	0	0	0	PP_2214	3-hydroxyacyl-CoA dehydrogenase FadB2x
Q88KS4	3.45353e+08	2.68587e+08	2.64347e+08	8.04463e+07	7.91363e+07	8.66317e+07	PP_2215	3-ketoacyl-CoA thiolase
Q88KS3	0	0	0	11298000	0	0	PP_2216	Acyl-CoA dehydrogenase family protein
Q88KS2	1136066667	1602300000	9.23467e+08	8.37257e+08	770110000	6.82287e+08	PP_2217	Enoyl-CoA hydratase/isomerase FadB1x
Q88KS0	12252000	4.79317e+07	3.41627e+07	245030000	3.77643e+08	200200000	PP_2220	C4-type zinc finger protein, DksA/TraR family
Q88KR7	4.26637e+07	41979000	50255000	5.05567e+07	83636000	71596000	PP_2223	Uncharacterized protein
Q88KQ7	663300000	1405566667	4.01703e+08	2.09173e+08	160860000	1.45777e+08	PP_2233	Hydrolase, isochorismatase family
Q88KQ2	264190000	1.79086e+08	1.26593e+08	62098000	103844000	101132000	PP_2238	Peptidase, M24 family protein
Q88KP1	366940000	2.20643e+08	1.58493e+08	6.47963e+07	5.70177e+07	1.15377e+08	PP_2249	Methyl-accepting chemotaxis transducer
Q88KN6	2.47173e+07	3.34147e+07	28004000	25715000	2.41943e+07	30042000	PP_2254	Transcriptional regulator, GntR family
Q88KM6	7.92177e+08	3.01067e+08	3.07753e+08	1.14577e+08	188910000	1.73543e+08	PP_2264	Sugar ABC transporter, periplasmic sugar-binding protein, putative
Q88KM5	3.99497e+08	3.30837e+08	442420000	844750000	9.30737e+08	8.41097e+08	PP_2265	Bifunctional protein FolD 2
Q88KL5	2.10453e+07	41430000	19136000	0	3.94913e+07	2.25683e+07	PP_2275	Uncharacterized protein
Q88KL3	295690000	3.29433e+08	4.08153e+08	4.39843e+08	221840000	387250000	PP_2277	Uncharacterized protein
Q88KJ8	5.31687e+08	9.72973e+08	6.51773e+08	1.0553e+08	1.54433e+08	147530000	PP_2292	Uncharacterized protein
Q88KJ6	0	0	0	0	0	2.13853e+07	PP_2294	Uncharacterized protein
Q88KJ4	0	0	0	0	0	4581000	PP_2296	Uncharacterized protein
Q88KJ2	0	0	6.38733e+07	235720000	129590000	1.45627e+08	PP_2298	Uncharacterized protein
Q88KJ1	11843333333	12272333333	15459000000	26186333333	21809666667	23170000000	PP_2299	Trigger factor
Q88KJ0	2579966667	3915400000	2705366667	2365433333	3222566667	2192766667	PP_2300	ATP-dependent Clp protease proteolytic subunit
Q88KI9	2328900000	3610833333	2752033333	2722333333	3526066667	2761500000	PP_2301	ATP-dependent Clp protease ATP-binding subunit ClpX
Q88KI8	1551500000	2032733333	2021233333	2644566667	1820033333	2342133333	PP_2302	Lon protease
Q88KI7	9129333333	7422700000	7685166667	4363766667	6375333333	6228866667	PP_2303	DNA-binding protein HU-beta
Q88KI6	1682233333	2185300000	2243933333	3574433333	2922100000	3272866667	PP_2304	Peptidylprolyl isomerase
Q88KI5	1.59757e+08	1.53577e+08	212380000	0	1.97177e+08	7.08733e+07	PP_2305	Uncharacterized protein
Q88KI4	5.46257e+07	0	2.09697e+07	0	0	0	PP_2306	Lipoprotein, putative
Q88KI3	420620000	1.27233e+08	2.44833e+08	97775000	9.44023e+07	1.14693e+08	PP_2307	Uncharacterized protein
Q88KI2	64081000	4.34383e+07	47596000	2.37437e+07	2.27283e+07	29702000	PP_2308	Acyl-CoA thioesterase II, putative
Q88KI0	42323000	50245000	4.31887e+07	7.30827e+07	39365000	5.63843e+07	PP_2310	Methyl-accepting chemotaxis transducer
Q88KH9	3.25323e+07	0	7.44167e+06	4.73667e+06	9.81733e+06	1.02963e+07	PP_2311	Hydrolase, TatD family
Q88KH5	1.67393e+07	0	0	0	0	0	PP_2315	Transcription elongation factor GreB
Q88KH2	1.51613e+07	0	0	0	0	0	PP_2318	Lipase, GDSL family
Q88KH0	459950000	3.30083e+08	489940000	7.22433e+08	4.82917e+08	6.40143e+08	PP_2320	Uncharacterized protein
Q88KG8	2.34463e+08	327665000	1.89223e+08	1.43543e+08	2.51203e+08	4.95303e+08	PP_2322	Outer membrane lipoprotein OprI
Q88KG7	1.82093e+08	253210000	273980000	1.27587e+08	8.59917e+07	144350000	PP_2323	Conserved domain protein
Q88KG6	9.75987e+08	1027946667	8.52813e+08	1295900000	1095666667	1064066667	PP_2324	Phospho-2-dehydro-3-deoxyheptonate aldolase
Q88KG5	0	2.84927e+07	0	0	0	0	PP_2325	2-dehydropantoate 2-reductase
Q88KG3	5.35453e+08	361500000	342960000	2.75653e+08	2.23727e+08	228800000	PP_2327	Transcriptional regulator CysB
Q88KG2	408240000	358680000	4.35283e+08	5.23593e+08	3.72507e+08	497860000	PP_2328	Phosphoadenosine phosphosulfate reductase
Q88KG0	7.56867e+07	89017000	1.27463e+08	357420000	1.25697e+08	176400000	PP_2330	Uncharacterized protein
Q88KF9	2.04627e+08	1.68487e+08	2.07383e+08	2.53267e+08	1.71497e+08	2.05987e+08	PP_2331	Uncharacterized protein
Q88KF8	2.92563e+07	2.48517e+07	39621000	30899000	4.00803e+07	4.60477e+07	PP_2332	Uncharacterized protein
Q88KF7	0	0	0	5875000	0	0	PP_2333	Transcriptional regulator, GntR family
Q88KF6	793700000	934640000	8.69047e+08	1177686667	1210333333	844590000	PP_2334	2-methylisocitrate lyase
Q88KF5	1220900000	1687700000	1537200000	1784633333	2241466667	1367500000	PP_2335	Citrate synthase
Q88KF4	9.77117e+08	1374133333	1005776667	1153416667	1449433333	9.97457e+08	PP_2336	Aconitate hydratase, putative
Q88KF3	2.48937e+08	3.22057e+08	241220000	350750000	3.30727e+08	2.22863e+08	PP_2337	Uncharacterized protein
Q88KF2	4.55077e+08	267940000	1.71553e+08	5.90773e+07	70314000	6.91013e+07	PP_2338	2-methylcitrate dehydratase
Q88KF1	5372533333	6784466667	8018400000	31228000000	24762000000	27397333333	PP_2339	Aconitate hydratase B
Q88KE5	6.45637e+08	5.09427e+08	3.51557e+08	1.86107e+08	2.01883e+08	2.22027e+08	PP_2345	Uncharacterized protein
Q88KE3	0	0	0	0	0	9.23967e+06	PP_2347	DNA-binding response regulator
Q88KD9	8130333333	4429133333	3253200000	1.0623e+07	3.70967e+06	9294600	PP_2351	Acetyl-CoA synthetase, putative
Q88KD6	0	7713000	0	0	0	0	PP_2354	Sensory box histidine kinase/response regulator
Q88KD5	4.45397e+08	4.01503e+08	4.28683e+08	3.81353e+08	2.81573e+08	273120000	PP_2355	Response regulator
Q88KD4	106271000	7.32077e+07	7.85437e+07	7.03593e+07	55956000	62017000	PP_2356	Phytochrome family protein, putative
Q88KD1	0	0	5.59733e+06	0	0	0	PP_2359	Type 1 pili subunit CsuA/B protein, putative
Q88KC9	3.37863e+08	4.95057e+07	8.57487e+07	4.33143e+07	1.66393e+07	3.56283e+07	PP_2361	Type 1 pili usher pathway chaperone CsuC
Q88KC6	1320433333	1709766667	1289900000	9.85583e+08	8.46077e+08	893040000	PP_2364	Uncharacterized protein
Q88KC0	4.30093e+08	5.69893e+08	5.37447e+08	887420000	6.91083e+08	9.98127e+08	PP_2370	Uncharacterized protein
Q88KB9	2938633333	3391700000	3449733333	6632600000	4547966667	5876600000	PP_2371	Sulphite reductase hemoprotein, beta subunit
Q88KB5	503700000	868130000	7.77737e+08	1089960000	1000680000	1146966667	PP_2375	5-methyltetrahydrofolate--homocysteine methyltransferase
Q88KB4	66053000	1.23616e+08	79162000	6.55913e+07	1.67397e+08	6.84043e+07	PP_2376	Esterified fatty acid cis/trans isomerase
Q88KB2	7.07883e+08	750790000	7.56797e+08	9.93877e+08	737470000	7.54733e+08	PP_2378	Fe/S biogenesis protein NfuA
Q88KB0	2.23177e+08	1.66507e+08	1.55523e+08	169260000	1.47823e+08	2.18393e+08	PP_2380	Uncharacterized protein
Q88KA9	0	0	0	0	0	4.42367e+06	PP_2381	Conserved domain protein
Q88KA3	4.67367e+07	8.76253e+07	1.11527e+08	172150000	0	121630000	PP_2387	Uncharacterized protein
Q88K95	1676700000	8.51453e+08	1154633333	525010000	3.02333e+08	5.97767e+08	PP_2396	Uncharacterized protein
Q88K81	0	0	0	0	0	362200000	PP_2410	Cobalt-zinc-cadmium resistance protein CzcA
Q88K70	236540000	145605000	9.77743e+07	4.63087e+07	4.69223e+07	52378000	PP_2421	Acetyltransferase, GNAT family
Q88K69	6945833333	3541700000	2896433333	4.51687e+08	229060000	3.66313e+08	PP_2422	Alkyl hydroperoxide reductase AhpD
Q88K66	1540766667	8.86333e+07	89890000	3.17977e+07	42341000	3.97233e+07	PP_2425	Transcriptional regulator, AraC family
Q88K65	1751666667	2.68987e+08	2.25333e+08	2.10533e+07	2.94277e+07	2.40183e+07	PP_2426	D-isomer specific 2-hydroxyacid dehydrogenase family protein
Q88K59	8.03793e+07	3.42657e+08	135480000	2.37383e+08	2.94413e+08	178840000	PP_2432	Oxygen-insensitive NAD(P)H nitroreductase
Q88K55	104399000	2.03237e+08	9.41103e+07	9.13703e+07	1.09996e+08	9.40577e+07	PP_2436	Transcriptional regulator, LysR family
Q88K54	0	0	14439000	0	0	0	PP_2437	Acyl-CoA dehydrogenase, putative
Q88K53	0	9.51243e+07	52471000	228457000	287560000	266440000	PP_2438	Uncharacterized protein
Q88K52	2879033333	4078833333	3123400000	9631533333	5116900000	8178000000	PP_2439	Alkyl hydroperoxide reductase, C subunit
P0A155	0	0	0	2.80243e+06	0	0	PP_2440	Alkyl hydroperoxide reductase subunit F
Q88K50	9.95607e+08	1435300000	6.77713e+08	5.31897e+08	1011296667	522380000	PP_2442	UPF0502 protein PP_2442
Q88K49	6.20623e+07	8.27277e+07	4.53547e+07	108999000	1.06907e+08	7.03563e+07	PP_2443	Serine/threonine transporter SstT
Q88K44	1.16211e+08	2.01683e+08	1.02914e+08	7.50397e+07	1.43087e+08	8.68603e+07	PP_2448	Uncharacterized protein
Q88K43	2.37527e+08	2.88947e+08	1.89247e+08	3.75123e+08	112070000	541970000	PP_2449	Uncharacterized protein
Q88K39	369200000	1004443333	606040000	1.96307e+08	104894000	1.59157e+08	PP_2453	Glutaminase-asparaginase
Q88K38	7.03897e+08	1022626667	6.82533e+08	3.18273e+08	428810000	3.17447e+08	PP_2454	Ribose ABC transporter, periplasmic ribose-binding protein
Q88K36	0	0	0	0	4.30467e+06	0	PP_2456	Ribose ABC transporter, permease protein
Q88K35	2.30093e+07	0	0	0	0	0	PP_2457	Ribose operon repressor
Q88K34	0	0	0	0	0	6076000	PP_2458	Ribokinase
Q88K32	0	0	0	0	3844000	0	PP_2460	Inosine-uridine preferring nucleoside hydrolase
Q88K31	1.30172e+08	8.55257e+07	5.52463e+07	35447000	1.87863e+07	32437000	PP_2461	Uncharacterized protein
Q88K30	5.56593e+07	60190000	1.45733e+08	60758000	0	1.96993e+07	PP_2462	Uncharacterized protein
Q88K29	14240666667	16408666667	23104000000	22010666667	17504333333	23683333333	PP_2463	Cold shock protein CspA
Q88K27	1497066667	2315066667	1965200000	2824100000	2798666667	3009833333	PP_2465	Threonine--tRNA ligase
Q88K26	2377566667	2840700000	3419933333	4176333333	3681133333	3974566667	PP_2466	Translation initiation factor IF-3
Q88K25	2279466667	3920366667	3834133333	9825833333	7438333333	7316433333	PP_2467	50S ribosomal protein L35
Q88K24	2823500000	3505400000	4266100000	6105433333	7149866667	6716633333	PP_2468	50S ribosomal protein L20
Q88K23	1086566667	1137033333	1240766667	2141100000	1653166667	1974633333	PP_2469	Phenylalanine--tRNA ligase alpha subunit
Q88K22	1542700000	1748633333	2092066667	3450666667	2559233333	2965800000	PP_2470	Phenylalanine--tRNA ligase beta subunit
P0A126	775000000	4.03947e+08	388150000	1.56207e+08	122330000	1.86687e+08	PP_2471	Integration host factor subunit alpha
Q88K21	1.27607e+08	5.24747e+07	51132000	0	0	1.67293e+07	PP_2472	Uncharacterized protein
Q88K19	155500000	2.18417e+08	244710000	3.72353e+08	1.94973e+08	2.81953e+08	PP_2474	Glutathione S-transferase family protein
Q88K18	0	0	0	0	12231000	0	PP_2475	Transcriptional regulator, TetR family
Q88K17	5.19917e+07	4.18533e+07	3.04087e+07	1.16656e+08	49849000	49891000	PP_2476	Alcohol dehydrogenase, zinc-containing
Q88K12	0	0	0	2.02093e+08	0	0	PP_2481	Uncharacterized protein
Q88K09	0	0	0	0	0	7.02667e+06	PP_2484	Transcriptional regulator, ArsR family
Q88K07	3.15793e+07	145830000	126480000	240460000	1.15219e+08	1.3499e+08	PP_2486	NADH-dependent flavin oxidoreductase, Oye family
Q88K06	6.67473e+07	66179000	8.08543e+07	1.51913e+08	122530000	1.15804e+08	PP_2487	Aldehyde dehydrogenase family protein
Q88K05	135380000	2.91867e+08	82518000	2.25427e+08	178040000	1.58523e+08	PP_2488	Succinic-semialdehyde dehydrogenase, putative
Q88K02	5.35527e+07	1.68607e+08	7.90943e+07	1.5829e+08	6.43083e+07	5.58393e+07	PP_2491	ThiJ/PfpI family protein
Q88JY8	0	0	0	0	0	5.68167e+06	PP_2505	GAF domain/GGDEF domain protein
Q88JX1	2.20447e+08	9.43527e+07	1.03481e+08	0	15501000	8369000	PP_2526	Uncharacterized protein
Q88JW9	420590000	8.40017e+08	500110000	2.05183e+08	1.64867e+08	2.89057e+08	PP_2528	O-acetylhomoserine sulfhydrylase
Q88JW1	188070000	1.92617e+08	1.64187e+08	109770000	8.57027e+07	110458000	PP_2536	Glutathione S-transferase family protein
Q88JV7	0	0	0	0	0	8389000	PP_2540	Oxidoreductase, short-chain dehydrogenase/reductase family
Q88JV5	0	0	0	0	1.95577e+07	0	PP_2542	Transcriptional regulator, GntR family
Q88JV4	33163000	48800000	1.55483e+08	0	0	3.66833e+06	PP_2543	Gamma-aminobutyrate transporter, putative
Q88JV2	2.18817e+08	175850000	1.37215e+08	59140000	7.74387e+07	7.76027e+07	PP_2545	Trans-aconitate methyltransferase, putative
Q88JU7	359030000	406520000	3.22347e+08	512580000	4.84313e+08	5.30027e+08	PP_2550	Probable transcriptional regulatory protein PP_2550
Q88JU3	76111000	3.88323e+07	3.90367e+07	0	2.94207e+07	0	PP_2554	4-hydroxyphenylpyruvate dioxygenase, putative
Q88JT4	0	0	2.52657e+06	0	0	0	PP_2563	Antibiotic biosynthesis protein, putative
Q88JT1	4.98637e+07	6.61687e+07	54180000	1.10864e+08	103723000	110154000	PP_2566	Leucine-rich repeat domain protein
Q88JS8	1.74877e+08	3.96287e+07	6.70247e+07	5.56813e+07	5.05187e+07	51057000	PP_2569	Metabolite MFS transporter, MHS family
Q88JS2	1.79927e+07	2.07043e+06	2.19333e+06	0	0	0	PP_2577	PqiB family protein
Q88JR6	0	0	0	0	0	3.08057e+07	PP_2583	Acetyltransferase, GNAT family
Q88JR1	7.65633e+07	56549000	58851000	0	1.52347e+07	1.54637e+07	PP_2588	Aminotransferase, class III
Q88JR0	0	17885000	0	0	0	0	PP_2589	Aldehyde dehydrogenase family protein
Q88JP8	0	0	0	0	0	6389000	PP_2601	Transcriptional regulator, IclR family
Q88JK6	0	0	0	1.29259e+08	1.87967e+08	71480000	PP_2643	Methyl-accepting chemotaxis transducer
Q88JJ3	0	0	7.70567e+06	0	0	0	PP_2656	Phosphate-binding protein PstS
Q88JI7	1268103333	1031616667	4.11237e+08	2878433333	4.64397e+08	2.08197e+08	PP_2662	Uncharacterized protein
Q88JI6	2178866667	1000253333	6.60417e+08	6.53297e+08	4.26317e+08	4.18537e+08	PP_2663	Uncharacterized protein
Q88JI5	3909566667	2154966667	1267400000	1225566667	8.85253e+08	8.19047e+08	PP_2664	Sensory box histidine kinase/response regulator
Q88JI4	1749566667	7.76373e+08	977300000	3.06327e+08	3.87497e+08	398630000	PP_2665	DNA-binding response regulator AgmR
Q88JI3	572610000	484330000	4.30153e+08	2.08003e+08	2.17317e+08	2.32937e+08	PP_2666	Uncharacterized protein
Q88JI1	648900000	6.44327e+08	525540000	383600000	306840000	3.83943e+08	PP_2668	ABC efflux transporter, ATP-binding protein
Q88JI0	2695400000	1303866667	1221600000	9.04043e+08	752520000	7.74267e+08	PP_2669	Outer membrane protein, putative
Q88JH7	1.31632e+08	103634000	9.44237e+07	115370000	1.03771e+08	1.17493e+08	PP_2672	DNA-binding response regulator, LuxR family
Q88JH6	22089333333	11514000000	13147000000	7111266667	3314366667	6470100000	PP_2673	Pentapeptide repeat family protein
Q88JH5	135333000000	74788000000	87486000000	46587000000	25760000000	41785000000	PP_2674	Quinoprotein ethanol dehydrogenase
Q88JH4	18715333333	6914100000	10696933333	7359900000	3738766667	5600633333	PP_2675	Cytochrome c-type protein
Q88JH3	1801433333	6.72193e+08	8.95817e+08	6.14217e+08	2.80687e+08	534510000	PP_2676	Periplasmic binding protein, putative
Q88JH2	1508666667	593120000	691370000	5.48117e+08	2.64507e+08	4.68043e+08	PP_2677	Uncharacterized protein
Q88JH1	1474866667	5.96093e+08	6.13247e+08	557880000	183790000	413410000	PP_2678	Hydrolase, putative
Q88JH0	7970366667	15216333333	7277600000	8873266667	9813433333	8642700000	PP_2679	Quinoprotein ethanol dehydrogenase, putative
Q88JG9	88986333333	71567000000	59372000000	43394666667	38859666667	34830666667	PP_2680	Aldehyde dehydrogenase family protein
Q88JG7	46699000	31468000	1.09073e+07	0	0	0	PP_2682	Alcohol dehydrogenase, iron-containing
Q88JG6	4.96357e+08	2.53713e+08	2.09133e+08	8.35777e+07	7.59727e+07	71276000	PP_2683	Sensory box histidine kinase/response regulator
Q88JE8	0	0	0	0	0	6.32033e+06	PP_2701	Transcriptional regulator, LysR family
Q88JD6	2.50997e+08	0	0	0	0	0	PP_2713	DNA-binding response regulator
Q88JD5	1.60863e+08	0	0	0	0	0	PP_2714	Sensor histidine kinase
Q88JB5	0	0	0	2.33313e+07	0	0	PP_2734	Cyclopropane-fatty-acyl-phospholipid synthase
Q88JB0	2.30397e+07	0	0	0	0	0	PP_2739	Sensory box protein, putative
Q88J43	72045000	1.12183e+08	7.70007e+07	1.04681e+08	93517000	8.83837e+07	PP_2806	Transcriptional regulator, TetR family
Q88J22	5.22433e+07	8.28933e+07	1.09067e+08	1.68937e+08	1.13097e+08	0	PP_2827	Alcohol dehydrogenase, zinc-containing
Q88J00	0	0	0	0	1.14607e+07	0	PP_2849	Urease accessory protein UreG
Q88IZ6	3.80437e+08	1.08836e+08	119679000	4.77093e+07	6.99583e+07	0	PP_2853	Uncharacterized protein
Q88IY8	3.84957e+08	225220000	1.46477e+08	93509000	1.1471e+08	1.60663e+08	PP_2861	Methyl-accepting chemotaxis transducer
Q88IY2	285150000	3.73917e+08	201100000	147420000	1.17295e+08	105197000	PP_2867	Pyridine nucleotide-disulphide oxidoreductase family protein
Q88IX4	77385000	87069000	62901000	0	0	0	PP_2875	Uncharacterized protein
Q88IX3	1.13245e+08	1.30647e+08	9.66657e+07	1.06768e+08	132130000	1.12615e+08	PP_2876	Beta-lactamase
Q88IW8	3.26637e+07	243788000	4.65257e+07	0	3.44517e+07	0	PP_2881	Oxidoreductase, short chain dehydrogenase/reductase family
Q88IV9	1.67953e+08	287650000	131840000	1.94927e+08	1.90077e+08	143740000	PP_2890	Exodeoxyribonuclease III
Q88IU6	4043500000	3305766667	4534933333	3277600000	3409633333	4019433333	PP_2903	Peptidyl-prolyl cis-trans isomerase
Q88IU5	1263866667	1353600000	1475200000	2504900000	1878666667	2231566667	PP_2904	Glutamine--tRNA ligase
Q88IU4	9.12263e+08	8.33807e+08	842090000	1418166667	1054066667	1171100000	PP_2905	Cysteine--tRNA ligase
Q88IU1	0	0	0	0	8.23367e+06	0	PP_2908	Transcriptional regulator, putative
Q88IT7	0	0	0	11923000	0	0	PP_2912	RIO1/ZK632.3/MJ0444 family protein
Q88IT6	1259633333	1133603333	6.95077e+08	5.90253e+08	8.79243e+08	6.54243e+08	PP_2913	Delta-aminolevulinic acid dehydratase
Q88IS4	4.44083e+08	79616000	1.54573e+08	7.87443e+07	8.94123e+07	6.08553e+07	PP_2925	Probable malate:quinone oxidoreductase 3
Q88IS1	421400000	1627766667	1199300000	3246733333	4561833333	2742733333	PP_2928	Uncharacterized protein
Q88IS0	260620000	657020000	4.09783e+08	1098710000	1274333333	9.13827e+08	PP_2929	Carboxynorspermidine/carboxyspermidine decarboxylase
Q88IR7	3.23393e+08	2.89003e+08	3.17593e+08	290880000	176470000	2.64457e+08	PP_2932	Amidase family protein
Q88IR6	3.69763e+08	4.80403e+08	243070000	2.10763e+08	208430000	1.51943e+08	PP_2933	Glutathione S-transferase family protein
Q88IR3	36050000	4.53343e+07	79564000	1.38113e+08	1.61483e+08	1.49257e+08	PP_2936	ABC transporter, ATP-binding protein
Q88IR1	0	0	10210000	0	0	0	PP_2938	Uncharacterized protein
Q88IR0	0	0	0	0	0	10912000	PP_2939	Uncharacterized protein
Q88IQ7	8.19023e+07	0	3.63213e+07	0	0	4.27963e+07	PP_2942	Response regulator
Q88IQ4	97022000	0	2.85813e+07	0	0	0	PP_2945	Sensor histidine kinase/response regulator
Q88IQ2	2353866667	1616833333	1619833333	899560000	891440000	9.20473e+08	PP_2947	Transcriptional regulator MvaT, P16 subunit, putative
Q88IP9	1.16663e+08	1.69383e+08	1.54333e+08	1.07284e+08	1.52153e+08	1.33143e+08	PP_2950	Uncharacterized protein
Q88IP0	0	0	0	3.26617e+06	0	0	PP_2959	Alkyl hydroperoxide reductase AhpD
Q88IL2	0	0	1.46477e+07	0	0	0	PP_2987	Uncharacterized protein
Q88IJ2	0	17909000	0	0	0	0	PP_3007	Uncharacterized protein
Q88IJ1	1.13997e+08	3.67267e+07	0	0	0	0	PP_3008	Uncharacterized protein
Q88II5	0	0	0	0	0	1.77043e+07	PP_3014	Uncharacterized protein
Q88II0	1.58047e+08	2.50513e+08	1.34501e+08	59827000	6.83263e+07	55251000	PP_3019	Carbon-nitrogen hydrolase family protein
Q88IH5	168410000	4.86803e+08	1.77667e+08	360910000	5.10013e+08	3.43157e+08	PP_3024	Uncharacterized protein
Q88ID2	0	0	1.06177e+07	0	0	0	PP_3067	Uncharacterized protein
Q88IC9	0	0	0	0	0	1160600	PP_3070	Peptidylprolyl isomerase
Q88IC8	2103833333	123230000	4.08167e+08	106720000	78806000	107740000	PP_3071	Acetoacetyl-CoA synthetase, putative
Q88IC7	2775633333	794170000	1025443333	5.51187e+08	5.49227e+08	648340000	PP_3072	Ecotin
Q88IC6	4900500000	523840000	7.50507e+08	1.69013e+07	2.92113e+07	17619000	PP_3073	3-hydroxybutyrate dehydrogenase
Q88IC0	8.89223e+08	1859633333	1298066667	2295933333	1960766667	2255700000	PP_3079	Peptidyl-prolyl cis-trans isomerase C
Q88IB9	0	2.09837e+08	125020000	2.39943e+08	3.59753e+08	2.30553e+08	PP_3080	Phospho-2-dehydro-3-deoxyheptonate aldolase
Q88IB8	0	0	0	0	0	3466000	PP_3081	Uncharacterized protein
Q88IB2	0	0	0	0	0	10899000	PP_3087	Excinuclease ABC, A subunit, putative
Q88IB1	48908000	8.44707e+07	659510000	182280000	7.99397e+07	4.41323e+08	PP_3088	Uncharacterized protein
Q88IB0	1075806667	1525000000	1109313333	1422233333	1415966667	1406933333	PP_3089	Uncharacterized protein
Q88IA9	6.32017e+07	1.37397e+08	888650000	3.53757e+08	1.14587e+08	5.67423e+08	PP_3090	OmpA domain protein
Q88IA8	4.33423e+08	572290000	3194533333	1330433333	3.75923e+08	1908633333	PP_3091	Uncharacterized protein
Q88IA7	1.04385e+08	1.39573e+08	8.98637e+08	1.52177e+08	1.02119e+08	2.28177e+08	PP_3092	Uncharacterized protein
Q88IA6	8.09577e+07	1.73053e+08	1021096667	3.67387e+08	1.98053e+08	6.05823e+08	PP_3093	Uncharacterized protein
Q88IA5	4.15517e+07	1.05748e+08	611460000	2.27203e+08	8.43527e+07	3.28727e+08	PP_3094	Uncharacterized protein
Q88IA4	362190000	1006576667	4607233333	1746366667	6.35667e+08	2643533333	PP_3095	Chaperone-associated ATPase, putative
Q88IA2	0	5.37573e+07	5.06967e+08	1.07599e+08	36936000	1.92432e+08	PP_3097	Uncharacterized protein
Q88IA0	7.65243e+08	1251766667	3825666667	2041666667	1403366667	3060033333	PP_3099	Uncharacterized protein
Q88I99	6.16227e+07	142220000	8.91947e+08	1.98463e+08	1.60803e+08	543200000	PP_3100	Uncharacterized protein
Q88I95	9.84187e+07	2.23923e+08	1.231e+08	6.27283e+07	106055000	58916000	PP_3104	Uncharacterized protein
Q88I93	8.08797e+08	1781033333	1703800000	9.22737e+08	1013886667	623340000	PP_3106	Uncharacterized protein
Q88I92	101666000	2.73463e+08	3.72333e+08	3.08413e+08	2.50227e+08	267170000	PP_3107	Uncharacterized protein
Q88I91	384300000	9.78637e+08	1081766667	4.51143e+08	4.51407e+08	542540000	PP_3108	Rhs-related protein
Q88I81	8.34243e+07	170330000	1.65333e+08	9.31997e+07	1.02183e+08	111155000	PP_3120	Oxidoreductase, aldo/keto reductase family
Q88I79	13565000000	1586300000	2681800000	283730000	2.33613e+07	130930000	PP_3122	CoA-transferase, subunit A, putative
Q88I78	11181466667	1708466667	2779533333	8.27283e+07	1.95967e+07	55061000	PP_3123	CoA-transferase, subunit B, putative
Q88I77	1.26693e+08	4.46883e+07	54058000	0	0	0	PP_3124	Transporter, short-chain fatty acid transporter family
Q88I76	13453000	0	0	0	0	0	PP_3125	Transcriptional regulator, Cro/CI family
Q88I75	778720000	1.26048e+08	250810000	72104000	7.14677e+07	8.65847e+07	PP_3126	Polysaccharide export protein, putative
Q88I74	1161466667	394790000	3.92197e+08	1.62857e+08	9.15413e+07	1.46773e+08	PP_3127	Exopolysaccharide transport protein, putative
Q88I73	489570000	1.77027e+08	2.29973e+08	69528000	42882000	7.03307e+07	PP_3128	Exopolysaccharide biosynthesis/transport protein, putative
Q88I71	1.22533e+08	2.36853e+07	1.79303e+07	2.13513e+07	0	1.29003e+07	PP_3130	Uncharacterized protein
Q88I70	0	4.70933e+06	0	0	0	0	PP_3131	Uncharacterized protein
Q88I67	8.14847e+07	1.68877e+07	2.84003e+07	2.90343e+07	1.16253e+07	12266000	PP_3134	Conserved domain protein
Q88I66	5.96263e+08	189520000	120120000	7.63103e+07	35028000	8.77073e+07	PP_3135	Glycosyl transferase, putative
Q88I63	5.75927e+07	0	0	0	0	0	PP_3138	VirK domain protein
Q88I62	1842666667	809130000	4.68937e+08	1.11312e+08	1.47717e+08	1.61023e+08	PP_3139	Glycosyl transferase, group 1 family protein
Q88I61	142010000	0	0	0	0	0	PP_3140	Glycosyl transferase, group 2 family protein
Q88I60	1.24733e+06	0	0	0	0	0	PP_3141	Glycosyl transferase, WecB/TagA/CpsF family
Q88I56	2433700000	1533833333	1353866667	5.29873e+08	4.48423e+08	4.89227e+08	PP_3145	Uncharacterized protein
Q88I55	0	4.96233e+07	0	54930000	0	1.30222e+08	PP_3146	Oxidoreductase, putative
Q88I50	4.15067e+07	2.81823e+08	239300000	2.99087e+07	13934000	3.59597e+07	PP_3151	Aldehyde dehydrogenase family protein
Q88I44	8.62097e+07	4.60207e+07	70217000	8.92513e+07	86339000	90000000	PP_3157	Inositol monophosphatase family protein
Q88I17	0	88498000	4.18697e+07	155470000	1.02312e+08	7.15547e+07	PP_3185	Aminopyrimidine aminohydrolase
Q88I16	2.09613e+08	321610000	3.08127e+08	3.44483e+08	2.89613e+08	326970000	PP_3186	Transcriptional activator, putative
Q88I13	3.46723e+08	4.83403e+08	4.41913e+08	3.90383e+08	344950000	4.70567e+08	PP_3189	Cytosine deaminase
Q88I10	0	0	9494000	0	0	0	PP_3192	Uncharacterized protein
Q88HZ8	0	0	0	0	0	2.07247e+07	PP_3204	Uncharacterized protein
Q88HX6	0	0	0	0	0	21301000	PP_3227	Transcriptional regulator, LysR family
Q88HW2	1.94157e+08	5.78633e+07	4.09667e+08	4.35413e+07	7.37223e+07	64334000	PP_3241	Uncharacterized protein
Q88HV5	1.84483e+08	3.93657e+08	206070000	412940000	5.85857e+08	3.96397e+08	PP_3248	Dyp-type peroxidase family protein
Q88HV4	0	0	1.18033e+07	0	0	0	PP_3249	Oxidoreductase, putative
Q88HU9	0	3.42833e+07	0	2.65323e+07	0	24272000	PP_3254	Nucleosidase, putative
Q88HR7	0	0	0	0	3914000	0	PP_3286	Phenylacetic acid degradation transcriptional repressor
Q88HQ3	0	0	0	0	0	7.73433e+06	PP_3300	Transcriptional regulator, tetR family
Q88HJ8	0	1.79993e+07	0	0	0	0	PP_3358	Enoyl-CoA hydratase/aldolase
Q88HJ2	1.87897e+08	2.14607e+08	6.10197e+07	4.10023e+07	4.70317e+07	4.50857e+07	PP_3364	Response regulator
Q88HJ0	8.79827e+07	88475000	7.32573e+07	8.34197e+07	8.42683e+07	7.17953e+07	PP_3367	Uncharacterized protein
Q88HI1	2.77503e+07	1.95593e+07	3.63307e+07	6802933333	9192566667	7024933333	PP_3376	2-ketogluconate 6-phosphate reductase
Q88HI0	0	0	0	0	0	46620000	PP_3377	2-ketogluconate transporter, putative
Q88HH9	8785000	4.85463e+06	10543800	2201900000	2770066667	2891233333	PP_3378	2-ketogluconate kinase
Q88HH8	2456800	0	0	1811533333	2095800000	1715666667	PP_3379	Epimerase KguE, putative
Q88HH7	147720000	2.28593e+08	156270000	1220233333	1091553333	1021256667	PP_3380	Transcriptional regulator PtxS
Q88HH6	1.21947e+07	0	2.07243e+07	4.95653e+08	6.14707e+08	4.73207e+08	PP_3382	Gluconate dehydrogenase cytochrome c subunit, putative
Q88HH5	2.62247e+07	0	2.08097e+07	1605100000	2045800000	1206400000	PP_3383	Gluconate dehydrogenase, putative
Q88HH4	28427000	52497000	1.70763e+07	7.80197e+08	8.78933e+08	619460000	PP_3384	Uncharacterized protein
Q88HF3	14284000	8.50117e+07	37396000	30762000	9.47163e+07	4.70823e+07	PP_3406	Acetyltransferase, GNAT family
Q88HE9	0	0	0	0	0	1.37663e+07	PP_3411	Uncharacterized protein
Q88HE6	2.80097e+06	0	0	0	0	0	PP_3414	Methyl-accepting chemotaxis transducer/sensory box protein
Q88HE5	33275000	4.38667e+07	4.32173e+07	1.95137e+08	1.13164e+08	1.68167e+08	PP_3415	Transcriptional regulator, LacI family
Q88HE4	1.85373e+07	0	43583000	1895266667	1353766667	1392933333	PP_3416	Gluconokinase
Q88HC9	9.87847e+08	219720000	1.93527e+08	1.46177e+07	1.40663e+07	5.06227e+07	PP_3431	ThiJ/PfpI family protein
Q88HC7	3.57123e+08	1.47823e+08	3.00207e+08	2.88633e+08	2.05707e+08	2.36487e+08	PP_3433	4-hydroxyphenylpyruvate dioxygenase
Q88HC5	4.60123e+07	2.38157e+07	0	0	0	5.33067e+06	PP_3435	Uncharacterized protein
Q88HC0	2.62277e+07	0	7619000	0	0	0	PP_3440	Uncharacterized protein
Q88HB9	576780000	1.45647e+08	6.56503e+07	5.86533e+06	1.65623e+07	7626000	PP_3441	Uncharacterized protein
Q88HB7	3.87767e+08	6.94113e+08	295000000	9.01973e+08	1150366667	7.73013e+08	PP_3443	Glyceraldehyde-3-phosphate dehydrogenase, putative
Q88HB6	2.57767e+08	0	9.15847e+07	0	0	0	PP_3444	Glyoxalase family protein
Q88HB5	1.20803e+07	0	0	0	0	0	PP_3445	Uncharacterized protein
Q88HB4	2.31233e+07	1.30743e+07	13796000	2.24947e+08	41855000	83790000	PP_3446	L-threonine dehydratase
Q88HB2	0	4.99367e+06	0	0	0	0	PP_3448	Bacteriophage receptor protein, putative
Q88HA3	0	2.10773e+07	0	0	0	0	PP_3457	Molybdenum cofactor guanylyltransferase
Q88HA1	4.58957e+07	2.07347e+07	0	0	0	0	PP_3459	Uncharacterized protein
Q88H94	5.61397e+07	8.78467e+07	4.92333e+06	5.65833e+06	3.56167e+07	0	PP_3466	ABC efflux transporter, permease/ATP-binding protein, putative
Q88H70	7952100000	4728000000	4325900000	1748866667	9.10143e+08	1312266667	PP_3491	Enoly-coenzyme A hydratase/isomerase family protein
Q88H69	10017466667	7219833333	6447300000	3695733333	1468333333	2515433333	PP_3492	Acyl-CoA dehydrogenase
Q88H65	367230000	481610000	3.07187e+08	3.86277e+08	502950000	315460000	PP_3496	Uncharacterized protein
Q88H64	5.47503e+07	9.50977e+07	9.37577e+07	358410000	2.57213e+08	2.96853e+08	PP_3497	Peptidase, U32 family
Q88H61	0	0	0	2.76187e+07	0	0	PP_3504	Uncharacterized protein
Q88H57	1.44013e+08	4.94267e+08	251720000	6.08747e+08	590830000	4.57857e+08	PP_3508	Cobalamin biosynthesis protein CobW
Q88H56	1.12215e+08	1.37307e+08	97982000	142290000	1.25017e+08	1.35533e+08	PP_3509	Glyoxalase family protein
Q88H54	14035333333	9945433333	9107233333	6663966667	7055800000	5562033333	PP_3511	Branched-chain-amino-acid aminotransferase
Q88H48	1576400	0	0	0	0	0	PP_3517	Uncharacterized protein
Q88H40	0	0	2.34867e+06	0	0	0	PP_3525	Uncharacterized protein
Q88H39	0	0	0	0	0	7.62833e+06	PP_3526	Transcriptional regulator, AraC family
Q88H38	0	0	0	3.47167e+07	0	0	PP_3527	Transcriptional regulator, TetR family
Q88H36	0	0	7.18467e+07	0	0	0	PP_3529	Monooxygenase, putative
Q88H35	7.50043e+08	804460000	5.67503e+08	5.51487e+08	805230000	4.65693e+08	PP_3530	Uncharacterized protein
Q88H29	1.28527e+07	23188000	0	0	0	0	PP_3536	Uncharacterized protein
Q88H28	4.60967e+07	2.76987e+07	13577000	0	0	0	PP_3537	4-hydroxybenzoate hydroxylase
Q88H26	0	0	0	0	1.68053e+07	0	PP_3539	Transcriptional regulator, putative
Q88H25	334320000	6.54867e+08	4.12833e+08	4.37173e+08	5.52387e+08	368030000	PP_3540	Hydroxymethylglutaryl-CoA lyase
Q88H23	0	0	0	0	5.03967e+06	0	PP_3542	Uncharacterized protein
Q88H18	3.93217e+08	3.06553e+08	3.77867e+08	1.59313e+08	1.23143e+08	141110000	PP_3547	Oxidoreductase, short chain dehydrogenase/reductase family
Q88H11	0	0	0	0	0	5292000	PP_3554	Acyl-CoA dehydrogenase family protein
Q88H08	4.68037e+07	56326000	2.14033e+07	29621000	8.22633e+06	2.85607e+07	PP_3557	Methyl-accepting chemotaxis transducer
Q88H07	190160000	1.19896e+08	117560000	1.48227e+07	6.91933e+06	0	PP_3558	Amino acid transporter, periplasmic amino acid-binding protein, putative
Q88H02	0	0	0	0	0	7.78067e+06	PP_3563	Uncharacterized protein
Q88GZ6	5.22217e+08	3.59423e+08	413040000	3.42253e+08	2.96967e+08	4.30443e+08	PP_3569	Quinate dehydrogenase (Pyrroloquinoline-quinone), putative
Q88GY7	9.04983e+08	8.37003e+08	1103633333	1276700000	1088700000	1187133333	PP_3578	Phosphoglucomutase, alpha-D-glucose phosphate-specific
Q88GY1	9.76953e+07	1.27603e+08	67497000	7.16457e+07	8.71027e+07	8.12717e+07	PP_3585	RND transporter, membrane fusion protein
Q88GY0	1212900000	2590000000	1616633333	1023463333	1308700000	7.89407e+08	PP_3587	Probable thiol peroxidase
Q88GX7	1160666667	1484300000	1211266667	2683933333	2451400000	1852233333	PP_3590	Aromatic-amino-acid aminotransferase
Q88GX6	226060000	5.41123e+08	2.59427e+08	1.40861e+08	374500000	1.23013e+08	PP_3591	Malate dehydrogenase, putative
Q88GX4	183980000	3.62387e+08	159755000	8.02767e+07	8.51183e+07	7.86143e+07	PP_3593	Amino acid ABC transporter, periplasmic amino acid-binding protein
Q88GW9	0	0	0	0	43570000	0	PP_3598	Uncharacterized protein
Q88GW5	2073300000	2267800000	1353730000	886190000	1025766667	844660000	PP_3602	Aldehyde dehydrogenase family protein
Q88GW4	0	0	0	0	0	2.24773e+07	PP_3603	Transcriptional regulator, GntR family
Q88GV6	1863800000	7.39727e+08	879620000	3.24143e+08	5.85157e+08	3.69827e+08	PP_3611	Uncharacterized protein
Q88GV4	0	0	1.12483e+06	0	0	0	PP_3613	L-sorbosone dehydrogenase
Q88GU7	3.94157e+08	2.12217e+08	2.44927e+08	328500000	3.37883e+08	3.46507e+08	PP_3620	Uncharacterized protein
Q88GU6	6297400000	214147000	8.72993e+07	6873800	7.48617e+06	6112400	PP_3621	Isoquinoline 1-oxidoreductase, alpha subunit, putative
Q88GU5	21770333333	8.64103e+08	1034260000	36862000	35295000	21655000	PP_3622	Isoquinoline 1-oxidoreductase, beta subunit, putative
Q88GU4	3026600000	1.04827e+08	1.56336e+08	7500000	3.47977e+06	2.01753e+06	PP_3623	Cytochrome c family protein
Q88GT8	0	0	0	0	0	4.95967e+06	PP_3629	Uncharacterized protein
Q88GT6	1.36337e+08	7.01113e+07	5.45047e+08	1.19747e+08	68248000	2.66724e+08	PP_3631	Uncharacterized protein
P59308	0	0	0	6.89827e+08	1359366667	515100000	PP_3633	N-acetyl-gamma-glutamyl-phosphate reductase 2
Q88GT2	2.25957e+08	2.66983e+08	9.57383e+07	55631000	44272000	55457000	PP_3636	Sulfonate ABC transporter, periplasmic sulfonate-binding protein, putative
Q88GT1	4.45957e+07	9.97593e+07	6.49753e+07	1.55113e+07	0	3.34543e+07	PP_3637	Sulfonate ABC transporter, ATP-binding protein, putative
Q88GT0	2.74133e+08	5.07233e+08	3.17403e+08	56972000	4.87227e+07	67682000	PP_3638	Acyl-CoA dehydrogenase, putative
Q88GS9	147210000	5.75283e+08	220820000	296740000	250600000	235310000	PP_3639	Alkyl hydroperoxide reductase AhpD
Q88GS4	9.69883e+07	4.88273e+08	7.93763e+07	7.62043e+07	96720000	4.03647e+07	PP_3644	Monooxygenase subunit, putative
Q88GS3	0	6.02467e+06	0	0	0	0	PP_3645	Hydrolase, alpha/beta fold family
Q88GS1	0	0	0	0	3.32023e+06	0	PP_3647	Oxidoreductase, putative
Q88GR9	3.83687e+08	214730000	2.65177e+08	331720000	2.54567e+08	323720000	PP_3649	Transcriptional regulator, GntR family
Q88GQ6	1327466667	1745766667	1647500000	1630000000	2013300000	1614266667	PP_3662	Decarboxylase family protein
Q88GQ0	5843900000	3394900000	2890833333	1010876667	1070893333	9.20647e+08	PP_3668	Catalase-peroxidase
Q88GP9	6.24717e+07	3.07693e+07	30119000	0	0	0	PP_3669	Transcriptional regulator, LysR family
Q88GP7	5.38733e+07	17401000	0	0	0	2.05967e+07	PP_3671	Oxidoreductase, aldo/keto reductase family
Q88GP0	312070000	466470000	121060000	2.12457e+08	368610000	1.85967e+08	PP_3680	Uncharacterized protein
Q88GN9	0	0	0	0	0	7.91867e+06	PP_3681	DNA helicase
Q88GN0	1496733333	1544633333	688690000	2058033333	1406066667	1477400000	PP_3691	DNA helicase-related protein
Q88GM9	5.69653e+07	629720000	63404000	5.33753e+07	32568000	5.33433e+07	PP_3692	Uncharacterized protein
Q88GM8	4766333333	3777266667	3437300000	1364300000	1486833333	1914033333	PP_3693	Transcriptional regulator MvaT, P16 subunit, putative
Q88GM2	1.1048e+08	1.90293e+08	7.92823e+07	4.64847e+08	475420000	423540000	PP_3699	Uncharacterized protein
Q88GL8	1.64843e+07	2.65323e+07	2.40357e+07	12559300	3.57627e+07	2.57793e+07	PP_3703	Uncharacterized protein
Q88GL7	0	0	0	0	0	2.97617e+07	PP_3704	Uncharacterized protein
Q88GL6	5234200	8463300	7.45767e+06	5.49037e+06	1.05911e+07	1.07149e+07	PP_3705	Uncharacterized protein
Q88GL5	1.08183e+08	2.32463e+08	7.86413e+07	141190000	1.51607e+08	167020000	PP_3706	Uncharacterized protein
Q88GL4	126080000	5.58733e+08	1.81723e+08	1.45983e+08	2.60747e+08	1.29216e+08	PP_3707	Uncharacterized protein
Q88GL3	154160000	2.60153e+08	220440000	2.71953e+08	4.14477e+08	4.28143e+08	PP_3708	Uncharacterized protein
Q88GK8	0	2.25345e+08	36686000	4.63987e+07	4.88233e+07	2.28997e+07	PP_3713	Catechol 1,2-dioxygenase
Q88GK1	1.31003e+08	3.51573e+08	137410000	53668000	4.30667e+07	5.64303e+07	PP_3720	NAD(P)H quinone oxidoreductase, putative
Q88GK0	59783000	108856000	3.89613e+07	0	0	1.52247e+07	PP_3721	Aspartate aminotransferase
Q88GI4	74838000	2.29683e+07	2.12927e+07	2.08757e+07	0	22832000	PP_3738	Transcriptional regulator VanR, putative
Q88GI1	285300000	6.62377e+08	3.38253e+08	136620000	149770000	1.23707e+08	PP_3742	Glutathione S-transferase family protein
Q88GH0	1211100000	1234300000	669180000	2.61937e+08	1.76727e+08	200130000	PP_3754	Beta-ketothiolase
Q88GG9	294580000	312740000	1.87237e+08	6.86727e+07	49971000	53944000	PP_3755	3-hydroxybutyryl-CoA dehydrogenase
Q88GG7	0	0	0	0	0	1.90637e+07	PP_3757	Response regulator
Q88GG6	1.58027e+07	41638000	1.79957e+07	0	0	1.41437e+07	PP_3758	Response regulator/sensor histidine kinase
Q88GG3	1286733333	1382133333	1168633333	7.54963e+08	5.79267e+08	751060000	PP_3761	Sensor histidine kinase/response regulator
Q88GF9	3516366667	1322066667	2184033333	1423766667	1010076667	1429300000	PP_3765	Transcriptional regulator MvaT, P16 subunit, putative
Q88GF8	4.28023e+07	21384000	0	4.56867e+07	4.04427e+07	1.05137e+07	PP_3766	Lactoylglutathione lyase
Q88GE9	8.09373e+08	8273833333	2051800000	3178966667	2475000000	2850666667	PP_3775	Sarcosine oxidase, putative
Q88GE7	88994000	5456000000	1178006667	2631166667	1563133333	2172166667	PP_3777	Uncharacterized protein
Q88GE6	7.45833e+08	10370800000	3515300000	2914766667	3594733333	4082400000	PP_3778	Pyrroline-5-carboxylate reductase
Q88GE5	0	0	0	27227000	0	0	PP_3779	Transcriptional regulator, LysR family
Q88GE3	16386000	6.71953e+08	328600000	3462833333	524820000	2558166667	PP_3781	Oxygen-independent Coproporphyrinogen III oxidase family protein
Q88GE2	0	3.57637e+08	3.23163e+07	4.96627e+08	1.14429e+08	3.01563e+08	PP_3782	Uncharacterized protein
Q88GE1	9.01767e+07	3423366667	1481766667	6733766667	2414800000	6450766667	PP_3783	Uncharacterized protein
Q88GE0	1.46472e+08	8185800000	1917600000	9251500000	3510933333	7790766667	PP_3784	Conserved domain protein
Q88GD9	3.31193e+07	1704266667	5.59413e+08	2862533333	9.93363e+08	2214066667	PP_3785	Uncharacterized protein
Q88GD8	3.44867e+07	4.73297e+08	1.21777e+08	9.77717e+08	2.66337e+08	8.99263e+08	PP_3786	Aminotransferase
Q88GD7	6.56687e+07	1239116667	2.11207e+08	1400030000	440130000	8.81213e+08	PP_3787	Uncharacterized protein
Q88GD6	0	6.51237e+07	0	1.1389e+08	5.02277e+07	1.19854e+08	PP_3788	Non-ribosomal peptide synthetase, putative
Q88GD4	8.10413e+07	818820000	162770000	1174066667	6.91163e+08	1045786667	PP_3790	Diaminopimelate epimerase
Q88GD0	0	0	1.86073e+07	5.09037e+07	0	0	PP_3794	D-alanyl-D-alanine-endopeptidase
Q88GB8	1.39377e+07	0	0	0	0	0	PP_3806	Hydrolase, isochorismatase family
Q88GB1	1553900	0	0	0	0	0	PP_3813	3,4-dihydroxy-2-butanone 4-phosphate synthase/GTP cyclohydrolase II
Q88GB0	318980000	3.27017e+08	211510000	6.23733e+07	5.20253e+07	43378000	PP_3814	Polyamine ABC transporter, periplasmic polyamine-binding protein
Q88GA7	10947000	2.84357e+07	0	0	0	0	PP_3817	Polyamine ABC transporter, ATP-binding protein
Q88GA5	2.24473e+07	50426000	26246000	49593000	46357000	4.68913e+07	PP_3819	Glutathione reductase
Q88GA4	1424866667	3401300000	2872700000	2543166667	3694933333	2671766667	PP_3821	UTP--glucose-1-phosphate uridylyltransferase
Q88GA3	18691000	1.87837e+08	9.27233e+07	0	0	0	PP_3822	Cytochrome c family protein
Q88GA2	0	1.92923e+08	1.63047e+08	0	0	0	PP_3823	Cytochrome c-type protein
Q88GA1	0	0	1.32993e+08	4.37573e+07	0	2.84763e+07	PP_3824	Uncharacterized protein
Q88G98	0	0	0	3.22833e+06	0	0	PP_3827	Uncharacterized protein
Q88G93	971020000	788120000	9.54027e+08	1.83247e+08	457550000	4.04377e+08	PP_3832	Carbon storage regulator homolog
Q88G91	0	0	7.94033e+06	0	0	0	PP_3834	Uncharacterized protein
Q88G86	1643733333	1146500000	1022060000	215530000	1.99033e+08	4.04797e+08	PP_3839	Alcohol dehydrogenase, zinc-containing
Q88G81	0	9802000	0	0	0	0	PP_3844	D-aminopeptidase putative
Q88G29	0	0	0	0	0	6.15067e+06	PP_3897	Uncharacterized protein
Q88G28	110493000	1.08099e+08	79227000	8.62383e+07	152550000	1.02208e+08	PP_3898	Uncharacterized protein
Q88G22	434900000	1712166667	492880000	9.76097e+08	682300000	982080000	PP_3904	Uncharacterized protein
Q88G17	7.55957e+08	1538366667	1014096667	7.04873e+08	6.03297e+08	8.87767e+08	PP_3909	Uncharacterized protein
Q88G04	9.18557e+07	165960000	1.44693e+08	197420000	2.14353e+08	1.71987e+08	PP_3922	SohB protein, peptidase U7 family
Q88G02	1321486667	2914600000	1792966667	9.94713e+08	1546700000	1133433333	PP_3924	Uncharacterized protein
Q88G01	0	0	0	0	8.51067e+06	0	PP_3925	Uncharacterized protein
Q88G00	1.12543e+08	4.85373e+08	168060000	81860000	164860000	101040000	PP_3926	Oxidoreductase, short-chain dehydrogenase/reductase family
Q88FZ9	0	0	0	0	0	4084000	PP_3927	Uncharacterized protein
Q88FZ6	0	0	1.88903e+07	0	0	0	PP_3930	Uncharacterized protein
Q88FY1	0	4.38633e+06	0	0	0	0	PP_3945	2,5-dihydroxypyridine 5,6-dioxygenase
Q88FY0	1.33497e+07	1.60777e+07	0	1.72837e+07	3.42657e+07	0	PP_3946	HTH-type transcriptional repressor NicR
Q88FX7	0	0	4.88767e+06	0	0	0	PP_3949	HTH-type transcriptional repressor NicS
Q88FX3	5.31297e+08	3.68167e+08	5.04353e+08	6.94693e+07	108130000	56993000	PP_3954	Periplasmic binding protein, putative
Q88FX0	84551000	8.53747e+07	29668000	0	0	0	PP_3957	Choline/carnitine/betaine transporter family protein
Q88FW3	0	0	0	25434000	0	0	PP_3964	ISPpu14, transposase Orf3
Q88FU7	2.09667e+08	5.57703e+07	103019000	8.96693e+07	4.72537e+07	6.08867e+07	PP_3984	ISPpu13, transposase Orf3
Q88FU4	4.15147e+08	3.86437e+08	4.45573e+08	5.51763e+08	403420000	479030000	PP_3988	Uncharacterized protein
Q88FU3	0	0	0	0	0	4.88967e+06	PP_3989	DNA-cytosine methyltransferase
Q88FT5	5.79483e+07	6.23587e+07	5.57403e+07	6.06033e+07	6.15353e+07	59628000	PP_3997	Glycosyl transferase, putative
Q88FT3	222310000	189910000	2.35127e+08	2.88823e+08	2.46023e+08	3.14417e+08	PP_3999	Siroheme synthase
Q88FT2	1366200000	1624700000	1398700000	2364633333	2224433333	2049766667	PP_4000	Serine--tRNA ligase
Q88FS9	572880000	6.46747e+08	710390000	1005676667	918590000	9.97397e+08	PP_4003	Outer-membrane lipoprotein carrier protein
Q88FS8	0	0	7.88567e+06	0	0	1.19977e+07	PP_4004	DNA translocase FtsK
Q88FS7	61918000	34702000	30840000	25631000	3.37967e+07	3.08883e+07	PP_4005	Leucyl/phenylalanyl-tRNA--protein transferase
P65117	3.53207e+08	3.94703e+08	3.90257e+08	683010000	694550000	5.83987e+08	PP_4007	Translation initiation factor IF-1
Q88FS5	9.42183e+08	1142800000	1034693333	1100333333	970690000	1012766667	PP_4008	ATP-dependent Clp protease, ATP-binding subunit ClpA
Q88FS4	19086000	102670000	59221000	73035000	6.89837e+07	45637000	PP_4009	ATP-dependent Clp protease adapter protein ClpS
Q88FS3	1084533333	1345766667	1001076667	2.49243e+08	5.71987e+08	3.13217e+08	PP_4010	Cold-shock protein CspD
Q88FS2	6548266667	6103000000	4271700000	1053106667	1258300000	1046970000	PP_4011	Isocitrate dehydrogenase [NADP]
Q88FS1	196590000	1091730000	531500000	4295433333	4468066667	3807100000	PP_4012	Isocitrate dehydrogenase, NADP-dependent, monomeric-type
Q88FS0	1.81887e+07	7.37233e+07	5.40283e+07	25795000	1.31997e+08	3.02217e+07	PP_4013	MutT/nudix family protein
Q88FR9	7.38723e+08	6.19993e+08	7.25457e+08	1124180000	1096716667	1070353333	PP_4014	tRNA-specific 2-thiouridylase MnmA
Q88FR7	1283266667	1836300000	1894300000	5832466667	5197700000	4635233333	PP_4016	Adenylosuccinate lyase
Q88FR6	1.54433e+08	244180000	248000000	3.12537e+08	270220000	331040000	PP_4017	Uncharacterized protein
Q88FR5	0	0	0	0	0	2.71913e+07	PP_4018	Acetyltransferase, GNAT family
Q88FQ8	4.02577e+07	1.18427e+08	1.50822e+08	6.39567e+07	47838000	3.58323e+07	PP_4029	NADH pyrophosphatase
Q88FQ7	1.50343e+08	1.51417e+08	1.59664e+08	9.68737e+07	130490000	1.18814e+08	PP_4030	Enoyl-CoA hydratase/isomerase family protein
Q88FQ5	1.49573e+08	8.20173e+07	2.86447e+08	1.12497e+08	81510000	119080000	PP_4032	Outer membrane lipoprotein Blc, putative
Q88FQ3	7490833333	5771100000	6271033333	9.33117e+08	287820000	1225000000	PP_4034	N-carbamoyl-beta-alanine amidohydrolase, putative
Q88FQ2	0	0	0	0	0	3501000	PP_4035	Transporter, NCS1 nucleoside transporter family
Q88FQ1	6446066667	5983766667	5977033333	1979100000	7.82773e+08	1525866667	PP_4037	Glutamate synthase, small subunit, putative
Q88FQ0	2461000000	2674300000	2748766667	8.92673e+08	355080000	6.90977e+08	PP_4038	Dihydroorotate dehydrogenase family protein
Q88FP6	410510000	4.89267e+08	341810000	143673000	205930000	1.30723e+08	PP_4043	6-phosphogluconate dehydrogenase
Q88FN9	3.38867e+06	0	0	0	0	0	PP_4050	Glycogen synthase
Q88FN8	1.15691e+08	32226000	43740000	3.59107e+07	9217000	32005000	PP_4051	Malto-oligosyltrehalose trehalohydrolase
Q88FN7	1322066667	3.29573e+08	506480000	1.02422e+08	36584000	9.83847e+07	PP_4052	4-alpha-glucanotransferase
Q88FN6	5.32127e+08	1.05766e+08	2.04173e+08	52820000	8867000	27759000	PP_4053	Glycosyl hydrolase, putative
Q88FN5	2489733333	1229533333	1084396667	3.78883e+08	1.83927e+08	3.60473e+08	PP_4054	Uncharacterized protein
Q88FN4	7.29207e+08	213580000	2.77737e+08	71692000	7.17883e+07	74432000	PP_4055	Glycogen operon protein GlgX homolog
Q88FN1	3.30387e+08	2.41017e+08	177200000	84842000	4.84547e+07	7.38773e+07	PP_4058	1,4-alpha-glucan branching enzyme GlgB
Q88FN0	1.65705e+08	6.66533e+07	7.15107e+07	1.05187e+08	25483000	7.56113e+07	PP_4059	Trehalose synthase, putative
Q88FM9	369770000	7.42677e+07	1.01169e+08	4.21333e+07	5.97657e+07	6.67607e+07	PP_4060	Alpha-1,4-glucan:maltose-1-phosphate maltosyltransferase
Q88FM6	5.06677e+07	77633000	6.93883e+07	2.34707e+07	5.44333e+06	13894000	PP_4063	Long-chain-fatty-acid-CoA ligase, putative
Q88FM5	9.63833e+07	6.12197e+07	1.21489e+08	3.71897e+07	40370000	50946000	PP_4064	Isovaleryl-CoA dehydrogenase
Q88FM4	2.58373e+08	234150000	265830000	1.49273e+08	1.16183e+08	1.49737e+08	PP_4065	3-methylcrotonyl-CoA carboxylase, beta subunit, putative
Q88FM3	1.08993e+08	1.06373e+08	62467000	7.02763e+07	36484000	5.40593e+07	PP_4066	Enoyl-CoA hydratase, putative
Q88FM2	6.53353e+08	583640000	537560000	3.71477e+08	274660000	3.51257e+08	PP_4067	Acetyl-CoA carboxylase, biotin carboxylase, putative
Q88FL8	93059000	188090000	166270000	3.54923e+08	3.67867e+08	4.16827e+08	PP_4071	Uncharacterized protein
Q88FJ7	4.46817e+07	2.83763e+07	2.27687e+07	3.83053e+07	3.43857e+07	3.89893e+07	PP_4098	UvrABC system protein C
Q88FJ6	1.40461e+08	4.34767e+07	6.76687e+07	7.59763e+07	57325000	65385000	PP_4099	DNA-binding response regulator GacA
Q88FJ5	2.78033e+08	3.75993e+08	133000000	2.63553e+08	105692000	1.97133e+08	PP_4100	Transcriptional regulator, Cro/CI family
Q88FJ1	1.73673e+08	4.41817e+08	2.64243e+08	4.06277e+08	4.38233e+08	3.08353e+08	PP_4104	Glutathione S-transferase family protein
Q88FJ0	2.92477e+07	6.74773e+07	3.10533e+07	5.19867e+06	27658000	1.26077e+07	PP_4105	Uncharacterized protein
Q88FI8	0	2.79477e+08	0	0	2.84947e+08	3.28367e+07	PP_4107	Transcriptional regulator, LysR family
Q88FI7	0	1.07993e+07	0	0	0	0	PP_4108	4-aminobutyrate aminotransferase, putative
Q88FI6	7.64733e+06	10135400	1.94993e+07	0	6.04467e+06	2.90703e+06	PP_4109	Uncharacterized protein
Q88FI4	2332433333	1316666667	1005490000	276020000	3.70283e+08	2.55447e+08	PP_4111	Elongation factor G 2
Q88FI2	0	0	0	0	836400	0	PP_4114	Uncharacterized protein
Q88FI1	9.07443e+07	3.23137e+07	2.93813e+07	30129000	20693000	25782000	PP_4115	Uncharacterized protein
Q88FI0	65733666667	51385333333	82405000000	54348000000	36980666667	55044333333	PP_4116	Isocitrate lyase
Q88FH7	333620000	15537000	200590000	190320000	14699000	7.52537e+07	PP_4119	NADH-quinone oxidoreductase subunit A
Q88FH6	1096096667	8.56087e+08	1061650000	1227100000	9.45057e+08	1164700000	PP_4120	NADH-quinone oxidoreductase subunit B
Q88FH5	3329866667	2128200000	2539200000	3532733333	2471500000	2767033333	PP_4121	NADH-quinone oxidoreductase subunit C/D
Q88FH4	336260000	257880000	3.44887e+08	6.34917e+08	346380000	4.58997e+08	PP_4122	NADH dehydrogenase I, E subunit
Q88FH3	2209933333	1874400000	2374133333	3127666667	2321800000	2534666667	PP_4123	NADH dehydrogenase I, F subunit
Q88FH2	3433500000	2748866667	3518466667	3900366667	3159200000	3772700000	PP_4124	NADH-quinone oxidoreductase subunit G
Q88FH0	987110000	653200000	720310000	957210000	7.05207e+08	8.53397e+08	PP_4126	NADH-quinone oxidoreductase subunit I
Q88FF8	1128433333	781560000	6.56853e+08	169000000	170850000	1.86557e+08	PP_4138	Chromate reductase
Q88FF7	5.24833e+06	6.06733e+06	65777000	21522000	7.12967e+06	3.74343e+07	PP_4139	Uncharacterized protein
Q88FF5	0	0	0	0	2.24563e+07	0	PP_4142	Ribonuclease HI
Q88FF3	193900000	2.11567e+08	179140000	1.61557e+08	2.13197e+08	1.70763e+08	PP_4144	Hydroxyacylglutathione hydrolase
Q88FF0	45962000	22651000	4.19557e+07	38015000	34761000	3.64527e+07	PP_4147	Peptide ABC transporter, periplamic peptide-binding protein
Q88FE7	4.48767e+06	0	0	0	0	0	PP_4150	Peptide ABC transporter, ATP-binding protein
Q88FE3	0	0	0	0	3.74467e+06	0	PP_4154	ThrB family protein/aminotransferase, class III
Q88FD5	9.66193e+07	5.88897e+07	45061000	30026000	4.78793e+07	4.61133e+07	PP_4163	Uncharacterized protein
Q88FD1	0	0	3.76033e+07	0	0	0	PP_4167	Phosphohistidine phosphatase SixA
Q88FC9	5.46413e+08	7.22727e+08	5.69477e+08	7.33373e+08	846290000	661260000	PP_4169	Glycerol-3-phosphate dehydrogenase [NAD(P)+]
Q88FC6	3.69733e+06	0	0	0	0	0	PP_4172	Uncharacterized protein
Q88FC4	1050196667	974620000	1217923333	7.80833e+08	1234433333	1266466667	PP_4174	3-hydroxydecanoyl-[acyl-carrier-protein] dehydratase
Q88FC3	3386733333	3919700000	4076766667	3918466667	4477066667	4399233333	PP_4175	3-oxoacyl-(Acyl-carrier-protein) synthase I
Q88FC1	1.52319e+08	4.88227e+07	1.84913e+07	2.79293e+07	2.42063e+07	4.38317e+07	PP_4177	Uncharacterized protein
Q88FC0	7.84177e+08	6.30383e+08	830220000	1055166667	6.45027e+08	9.53317e+08	PP_4178	Dienelactone hydrolase family protein
Q88FB9	6771166667	14377000000	12397000000	19539666667	18678666667	19914333333	PP_4179	Chaperone protein HtpG
Q88FB3	13645333333	14286000000	17341666667	29929333333	35029666667	27292333333	PP_4185	Succinyl-CoA ligase [ADP-forming] subunit alpha
Q88FB2	17226333333	16263333333	21084000000	36765333333	32758000000	29801333333	PP_4186	Succinyl-CoA ligase [ADP-forming] subunit beta
Q88FB1	1241433333	1065600000	1332366667	2011100000	1655066667	1744500000	PP_4187	Dihydrolipoyl dehydrogenase
Q88FB0	7875100000	6843200000	8772300000	16983000000	12120000000	15213666667	PP_4188	Dihydrolipoyllysine-residue succinyltransferase component of 2-oxoglutarate dehydrogenase complex
Q88FA9	8360500000	5633933333	7750066667	14176000000	13344000000	13623666667	PP_4189	2-oxoglutarate dehydrogenase, E1 component
Q88FA8	4162133333	3524366667	3615733333	7473500000	5317833333	5101900000	PP_4190	Succinate dehydrogenase, iron-sulfur protein
Q88FA7	10092500000	6392533333	8592966667	10541566667	10311933333	9639800000	PP_4191	Succinate dehydrogenase flavoprotein subunit
Q88FA6	1.84037e+08	4.22133e+08	3.77277e+08	792880000	2.14053e+08	8.07643e+08	PP_4192	Succinate dehydrogenase hydrophobic membrane anchor subunit
Q88FA5	1061666667	8.32203e+08	1100563333	8.96477e+08	993230000	1171836667	PP_4193	Succinate dehydrogenase, cytochrome b556 subunit
Q88FA4	11104333333	11653000000	9415466667	10773733333	10654666667	10080433333	PP_4194	Citrate synthase
Q88FA1	0	0	0	0	0	1.06523e+07	PP_4197	Transcriptional regulator, GntR family
Q88FA0	0	0	2.14343e+07	23311000	0	0	PP_4198	OmpA family protein
Q88F99	330630000	2.97237e+08	262340000	4.40103e+08	2.58117e+08	3.38097e+08	PP_4199	Lipoprotein, putative
Q88F98	1.58315e+08	8.54223e+07	8.49257e+07	7.27317e+07	6.93607e+07	7.60467e+07	PP_4200	Uncharacterized protein
Q88F97	3204100000	4905733333	3957433333	3127133333	5120533333	3255433333	PP_4201	Electron transfer flavoprotein, alpha subunit
Q88F96	6624166667	11296000000	8944933333	8202466667	12902666667	7161366667	PP_4202	Electron transfer flavoprotein, beta subunit
Q88F95	2884000000	5195633333	3743333333	3119300000	4380800000	2564200000	PP_4203	Electron transfer flavoprotein-ubiquinone oxidoreductase, putative
Q88F56	1.58703e+08	1.70648e+08	1.83793e+08	462730000	551160000	5.14277e+08	PP_4243	Pyoverdine synthetase
Q88F51	1052566667	1523966667	1278266667	1927233333	1231833333	1767166667	PP_4248	UPF0345 protein PP_4248
Q88F50	67156000	7.48613e+07	58818000	50291000	79595000	55028000	PP_4249	Uncharacterized protein
Q88F48	0	0	0	0	0	2.73573e+07	PP_4251	Cytochrome c oxidase, cbb3-type, subunit II
Q88F44	4.99017e+07	1.18487e+08	84812000	5.40393e+07	4.67813e+07	1.04602e+08	PP_4255	Cytochrome c oxidase, cbb3-type, subunit I
Q88F43	1050900000	1438233333	1363333333	9.43573e+08	1023866667	1009693333	PP_4256	Cytochrome c oxidase, cbb3-type, subunit II
Q88F41	1725500000	2375166667	2035600000	1941800000	1689800000	1809200000	PP_4258	Cbb3-type cytochrome c oxidase subunit
Q88F40	2.54133e+08	2.51307e+08	2.59297e+08	1.31447e+08	122170000	172530000	PP_4259	Iron-sulfur cluster-binding protein
Q88F39	177760000	2.74433e+08	2.14887e+08	1.12247e+08	151160000	9.15867e+07	PP_4260	Uncharacterized protein
Q88F38	0	5.97433e+06	0	0	0	0	PP_4261	Cation-transporting P-type ATPase
Q88F34	8.58453e+07	179480000	1.78907e+08	1.47473e+08	1.84847e+08	6.73457e+07	PP_4265	Transcriptional regulator Anr
Q88F33	163650000	9.86977e+07	1.48037e+08	7.78033e+07	1.77957e+08	153880000	PP_4266	Adenine phosphoribosyltransferase
Q88F32	7.15233e+07	0	0	0	33720000	38860000	PP_4267	Recombination protein RecR
Q88F31	1.50903e+08	4.10297e+08	220190000	135959000	1.88367e+08	2.52693e+08	PP_4268	Nucleoid-associated protein PP_4268
Q88F30	1.46217e+08	1.26913e+08	1.28081e+08	173650000	157180000	146680000	PP_4269	DNA polymerase III, gamma and tau subunits
Q88F29	0	0	0	0	0	1.43377e+06	PP_4270	Uncharacterized protein
Q88F25	228240000	2.76383e+08	3.42487e+08	5.67167e+08	4.52053e+08	5.17903e+08	PP_4274	DNA ligase
Q88F24	8.14657e+08	6.85693e+08	8.53413e+08	5.82547e+08	5.19007e+08	613260000	PP_4275	Cell division protein ZipA
Q88F23	2103100	0	0	0	0	0	PP_4276	Chromosome partition protein Smc
Q88F22	3.87947e+07	0	7.21467e+06	0	0	0	PP_4277	Transcriptional regulator, GntR family
Q88F16	302880000	2.84807e+08	2.72307e+08	4.22863e+08	314290000	3.56597e+08	PP_4283	Transcriptional regulator, GntR family
Q88F13	0	0	0	0	0	5621000	PP_4286	Polysaccharide deacetylase family protein
Q88F12	93815000	9.97093e+07	1.09255e+08	9.56797e+07	5.95763e+07	37340000	PP_4287	Uncharacterized protein
Q88F05	2.46907e+08	185560000	2.34633e+08	2.31513e+08	1.68723e+08	209390000	PP_4295	Transcriptional regulator, TetR family
Q88F02	8.87403e+07	2.00173e+08	1.52267e+08	9.27463e+07	6.59543e+07	7.63193e+07	PP_4298	Hydroxypyruvate isomerase
Q88F01	4.15323e+08	9.11283e+08	5.98257e+08	4.73083e+08	419230000	401280000	PP_4299	2-hydroxy-3-oxopropionate reductase
Q88EZ5	7.74603e+08	1141433333	6.46553e+08	9.80743e+08	9.79543e+08	9.52223e+08	PP_4305	Periplasmic thiosulfate-binding protein
Q88EZ0	0	1.47717e+07	0	0	0	0	PP_4310	Hydantoin racemase, putative
Q88EY9	0	0	0	3516000	0	0	PP_4311	D-amino acid dehydrogenase, small subunit, putative
Q88EY7	6.63343e+07	8.85393e+07	91024000	8.44453e+07	7.98523e+07	7.25783e+07	PP_4313	Peptidyl-prolyl cis-trans isomerase
Q88EY6	2.17207e+07	9.02333e+06	0	0	0	0	PP_4314	Uncharacterized protein
Q88EY5	2.21823e+08	2.07703e+08	2.77717e+08	4.34317e+08	4.34883e+08	420750000	PP_4315	Phenazine biosynthesis protein, PhzF family
Q88EY4	0	0	0	0	6248000	0	PP_4316	D-isomer specific 2-hydroxyacid dehydrogenase family protein
Q877V8	1.33743e+07	1.18287e+07	0	1.70447e+07	0	0	PP_4318	ISPpu8, transposase
Q88EY2	4.36823e+08	305290000	265520000	1.54857e+08	166350000	1.55013e+08	PP_4319	Uncharacterized protein
Q88EY1	2.05563e+08	1.66993e+08	1.41483e+08	77074000	7.64987e+07	7.01273e+07	PP_4321	Thiol:disulfide interchange protein DsbE
Q88EY0	4.38657e+08	338010000	2.31647e+08	1.02007e+08	1.31597e+08	1.22887e+08	PP_4322	Cytochrome c-type biogenesis protein CcmF
Q88EX9	7.75293e+08	4.25977e+08	3.41677e+08	209850000	256410000	258340000	PP_4323	Cytochrome c-type biogenesis protein CcmE
Q88EX4	0	0	0	0	0	851633	PP_4328	Uncharacterized protein
Q88EX1	0	0	0	0	0	1.34297e+07	PP_4331	Uncharacterized protein
Q88EX0	1090396667	1045683333	7.00193e+08	972030000	6.39787e+08	943640000	PP_4332	Purine-binding chemotaxis protein CheW
Q88EW8	1.13337e+07	0	0	0	0	0	PP_4334	ParA family protein
Q88EW7	0	0	0	0	0	7.10033e+06	PP_4335	Flagellar motor protein MotB
Q88EW6	0	0	0	0	0	1.15677e+07	PP_4336	Flagellar motor protein MotA
Q88EW5	1.98473e+08	227550000	95876000	305060000	1.58717e+08	2.12023e+08	PP_4337	Chemotaxis response regulator protein-glutamate methylesterase of group 1 operon
Q88EW4	1092666667	1017370000	452480000	761000000	5.85683e+08	657960000	PP_4338	Chemotaxis histidine kinase CheA
Q88EW3	525380000	599910000	271620000	4.36737e+08	3.82123e+08	4.51313e+08	PP_4339	Protein phosphatase CheZ
Q88EW2	0	0	0	0	0	9.96033e+06	PP_4340	Chemotaxis protein CheY
Q88EW1	9.40523e+07	8.78557e+07	5.63827e+07	0	14915000	23140000	PP_4341	RNA polymerase sigma factor FliA
Q88EW0	3.18127e+08	210040000	1.67073e+08	1.80077e+08	1.28127e+08	175470000	PP_4342	Site-determining protein
Q88EV7	0	0	0	1.06783e+07	0	0	PP_4345	Transcriptional regulator, GntR family
Q88EU6	0	0	0	0	9.96433e+06	0	PP_4357	Flagellar motor switch protein FliN
Q88EU5	127920000	1.89477e+08	8.30213e+07	1.91017e+08	1.62873e+08	1.47707e+08	PP_4358	Flagellar motor switch protein FliM
Q88EU4	0	0	8.85033e+07	0	0	5.08333e+07	PP_4359	Flagellar protein FliL
Q88EU1	2.66217e+08	1.83407e+08	2.75793e+08	9.60723e+07	4.07627e+07	89460000	PP_4362	Uncharacterized protein
Q88EU0	1.5134e+08	1.66247e+08	193310000	3.36043e+08	3.36777e+08	2.88537e+08	PP_4363	Sensor histidine kinase/response regulator
Q88ET9	6.07063e+08	160840000	2.44763e+08	96245000	69753000	127750000	PP_4364	Anti-sigma F factor antagonist, putative
Q88ET6	0	0	0	0	0	1.02237e+07	PP_4367	Flagellar assembly protein FliH
Q88ET5	6.29707e+07	1.16387e+08	9.86337e+07	148013000	105144000	1.65063e+08	PP_4368	Flagellar motor switch protein FliG
Q88ET4	2.24463e+07	29987000	23378000	2.45783e+07	2.85083e+07	3.52453e+07	PP_4369	Flagellar M-ring protein
Q88ET0	7.83427e+08	6.52573e+08	4.07447e+08	5.54147e+08	4.69593e+08	427850000	PP_4373	Transcriptional regulator FleQ
Q88ES9	1.41307e+08	4.29253e+08	2.69477e+08	4.82437e+08	2.77683e+08	430580000	PP_4374	Uncharacterized protein
Q88ES8	2.37407e+08	3.21317e+08	1.88153e+08	4.36587e+08	288580000	413270000	PP_4375	Flagellar protein FliS
Q88ES7	1.93927e+08	238360000	1.41143e+08	9.77257e+07	1.27498e+08	88225000	PP_4376	Flagellar hook-associated protein 2
Q88ES6	159590000	2.76083e+08	124360000	3.07253e+08	1.38113e+08	276950000	PP_4377	Flagellin FlaG, putative
Q88ES5	10061566667	12593333333	9210033333	25067666667	15179666667	22052000000	PP_4378	Flagellin
Q88ES4	1374333333	1149233333	1377900000	1409366667	1030533333	1381433333	PP_4379	3-oxoacyl-(Acyl-carrier-protein) synthase III
Q88ES3	77696000	5.50697e+07	1.93547e+07	2.05773e+07	52770000	47014000	PP_4380	Flagellar hook-associated protein FlgL
Q88ES2	6.35187e+07	7.39453e+07	60551000	1.26327e+08	72982000	69476000	PP_4381	Flagellar hook-associated protein FlgK
Q88ES0	23395000	0	0	2.25753e+07	0	0	PP_4383	Flagellar P-ring protein
Q88ER5	0	0	0	4.26833e+06	0	0	PP_4388	Flagellar hook protein FlgE
Q88ER4	0	3996000	0	0	0	0	PP_4389	Basal-body rod modification protein FlgD
Q88ER1	3.69803e+08	366300000	2.56907e+08	406500000	3.94673e+08	3.98593e+08	PP_4392	Chemotaxis protein methyltransferase Cher2
Q88ER0	5.73803e+08	3.74507e+08	2.28847e+08	3.31507e+08	2.22667e+08	3.15423e+08	PP_4393	Chemotaxis protein CheV
Q88EQ8	0	0	0	0	0	3202700	PP_4395	Negative regulator of flagellin synthesis FlgM
Q88EQ7	1.59267e+08	180580000	116795000	2.06147e+08	1.54103e+08	1.69977e+08	PP_4396	Uncharacterized protein
Q88EQ6	1.88727e+08	1.02384e+08	67035000	243930000	104540000	151380000	PP_4397	Flagellar brake protein YcgR
Q88EQ5	9.87633e+06	2.76143e+07	0	0	0	0	PP_4398	Major facilitator family transporter
Q88EQ4	5.53877e+08	1399666667	3.31827e+08	116220000	6.62643e+08	1.35337e+08	PP_4399	Glutamine synthetase, putative
Q88EQ3	19025000	7.56367e+07	2.79173e+07	1.09283e+07	0	8.03867e+06	PP_4400	Transcriptional regulator BkdR
Q88EQ0	6.59667e+07	5.29407e+07	7.06897e+07	70850000	56180000	5.91257e+07	PP_4403	2-oxoisovalerate dehydrogenase, lipoamide acyltransferase component
Q88EP8	0	0	0	0	8.75933e+06	0	PP_4405	Sensory box protein
Q88EP7	0	0	0	0	0	1.91213e+07	PP_4406	Uncharacterized protein
Q88EN3	2.67933e+07	0	0	0	0	0	PP_4421	Aminotransferase, class III
Q88EM6	2.89047e+08	2.08827e+08	9.86493e+07	29896000	4.40717e+07	3.53383e+07	PP_4428	Amino acid ABC transporter, periplasmic amino acid-binding protein
Q88EL9	0	0	0	0	0	0	PP_4435	Uncharacterized protein
Q88EL5	0	0	0	1.15133e+07	0	0	PP_4447	Uncharacterized protein
Q88EL4	1722600000	2230300000	1491933333	3103866667	954530000	2166433333	PP_4448	Uncharacterized protein
Q88EK2	4.99293e+07	5.37117e+07	3.71853e+07	3.36027e+07	38838000	12289000	PP_4460	Transcriptional regulator, LysR family
Q88EJ9	0	0	0	0	7.65967e+06	0	PP_4463	Carbon-nitrogen hydrolase family protein
Q88EJ7	0	5.42933e+06	0	0	0	0	PP_4465	Porin, putative
Q88EJ2	3.38497e+07	13576000	6.62757e+08	5.78287e+07	2.51203e+07	44180000	PP_4470	Alginate biosynthesis transcriptional activator
Q88EJ0	0	0	0	0	0	81790000	PP_4472	Carbon storage regulator homolog
Q88EI9	3045233333	3583866667	3830533333	5746000000	5622133333	5291933333	PP_4473	Aspartate kinase
Q88EI8	4409233333	4817233333	4892633333	7804400000	7011833333	6699600000	PP_4474	Alanine--tRNA ligase
Q88EI7	1.35347e+08	1.71737e+08	115425000	1.43527e+08	95191000	1.03024e+08	PP_4475	Succinylglutamate desuccinylase
Q88EI6	1.78033e+08	347240000	2.27107e+08	2.79193e+08	1.86703e+08	2.26197e+08	PP_4476	Uncharacterized protein
Q88EI5	8.31513e+08	1512833333	934380000	1298733333	1338966667	1380233333	PP_4477	N-succinylarginine dihydrolase
Q88EI4	93172000	153870000	1.21708e+08	1.29909e+08	1.18103e+08	113766000	PP_4478	N-succinylglutamate 5-semialdehyde dehydrogenase
Q88EI3	1.26243e+08	2.69207e+08	1.60223e+08	315970000	2.82193e+08	2.05227e+08	PP_4479	Arginine N-succinyltransferase
Q88EI2	6.04183e+07	1.15177e+08	8.20213e+07	61117000	7.61767e+07	6.53023e+07	PP_4480	Arginine N-succinyltransferase
P59319	1337666667	2130066667	1677333333	3209866667	2955400000	2621400000	PP_4481	Acetylornithine aminotransferase
Q88EI0	1.11197e+08	3.38327e+08	166470000	1.44083e+08	203250000	1.35237e+08	PP_4483	Basic amino acid ABC transporter, ATP-binding protein
Q88EH9	0	0	0	0	0	3.39933e+06	PP_4484	Basic amino acid ABC transporter, permease protein
Q88EH7	1517133333	3790333333	2529000000	1424100000	2196300000	1377500000	PP_4486	Basic amino acid ABC transporter, periplasmic basic amino acid-binding protein
Q88EH6	48389333333	57196000000	72794333333	24869666667	25151000000	21627333333	PP_4487	Acetyl-coenzyme A synthetase 1
Q88EH5	2.96097e+08	0	0	0	0	0	PP_4488	Uncharacterized protein
Q88EH4	0	0	0	4.32333e+07	0	0	PP_4489	Sigma-54 dependent transcriptional regulator PhhR
Q88EH2	2.18927e+08	4.28063e+08	2.52103e+08	1.71363e+08	2.73683e+08	1.30013e+08	PP_4491	Pterin-4-alpha-carbinolamine dehydratase
Q88EH0	1.06116e+08	151580000	2.23753e+08	7.04857e+08	608560000	5.86527e+08	PP_4493	Oxidoreductase, putative
Q88EG8	0	0	0	0	1.61033e+07	0	PP_4495	Aromatic amino acid transporter
Q88EG5	1.15527e+08	1.06377e+08	1.41063e+08	83941000	8.27303e+07	88087000	PP_4499	Sua5/YciO/YrdC/YwlC family protein
Q88EG2	0	0	0	0	0	4234000	PP_4503	DNA-binding response regulator
Q88EG1	0	0	0	0	0	11794000	PP_4504	Uncharacterized protein
Q88EF9	1027326667	796380000	868590000	858960000	7.38263e+08	856130000	PP_4506	Nitroreductase family protein
Q88EF7	2.64263e+07	0	0	0	0	0	PP_4508	Transcriptional regulator, AraC family
Q88EF2	0	0	0	0	0	2.04287e+06	PP_4513	Uncharacterized protein
Q88EF0	100144000	8.61273e+07	6.50627e+07	74421000	8.15293e+07	7.06337e+07	PP_4515	Transcriptional regulator, MarR family
Q88EE9	0	0	0	0	0	8.46733e+06	PP_4516	ATP-dependent DNA helicase RecQ
Q88EE8	35340000	33730000	72980000	3.41233e+07	0	0	PP_4517	Uncharacterized protein
Q88EE6	38952000	6.33623e+07	25001000	6944000	27333000	1.56583e+07	PP_4519	Agglutination protein
Q88EE4	1180100000	2.94987e+07	5.25103e+07	4.88113e+07	0	33978000	PP_4521	Aerotaxis receptor, putative
Q88ED3	7.62977e+08	4.69013e+08	474760000	1031956667	1063833333	873670000	PP_4532	ATP-dependent RNA helicase, DEAD box family
Q88ED0	6.59543e+07	8.01057e+07	70493000	75290000	6.19267e+07	6.75087e+07	PP_4535	Uncharacterized protein
Q88EC7	202380000	278760000	163900000	138280000	155750000	1.40917e+08	PP_4539	Transcriptional regulator, LysR family
Q88EC6	101870000	82672000	6.96853e+07	1.33443e+07	2.90613e+07	1.48213e+07	PP_4540	Hydrolase, alpha/beta fold family
Q88EC5	4.89353e+08	7.61213e+08	541370000	4.69293e+08	5.62467e+08	5.30203e+08	PP_4541	Peptidyl-prolyl cis-trans isomerase
Q88EC4	1.11414e+08	127257000	8.17523e+07	6.50853e+07	52119000	67978000	PP_4542	ABC transporter, ATP-binding protein/permease protein, putative
Q88EC1	1416833333	1290266667	1353800000	1411900000	974320000	1229333333	PP_4545	3-oxoacyl-(Acyl-carrier-protein) synthase III, putative
Q88EC0	3.21143e+07	71532000	5.53233e+07	1.68507e+08	143620000	1.53617e+08	PP_4546	ATP-dependent helicase HrpA
Q88EB7	1436066667	3420000000	1521400000	1106666667	2896200000	1154500000	PP_4549	Long-chain-fatty-acid-CoA ligase
Q88EB6	954800000	1615766667	740030000	3.43387e+08	538240000	296580000	PP_4550	Long-chain-fatty-acid--CoA ligase
Q88EB4	2.52893e+08	6.40433e+08	4.76747e+08	5.88157e+08	656430000	569400000	PP_4552	Enoyl-CoA hydratase, R-specific
Q88EB2	3.42127e+08	4.06573e+07	2.14197e+07	0	0	3.86467e+06	PP_4554	Uncharacterized protein
Q88EB1	1.69133e+08	1.30337e+08	1.20715e+08	1.92163e+08	1.92927e+08	2.13057e+08	PP_4555	Uncharacterized protein
Q88EB0	233420000	1.69787e+07	3.78753e+07	0	0	0	PP_4556	Uncharacterized protein
Q88EA5	253650000	2.08197e+08	1221566667	3.69697e+08	6.56777e+08	711460000	PP_4561	UPF0337 protein PP_4561
Q88EA4	1.00892e+08	30117000	3.37933e+07	0	1.37403e+08	7.00667e+07	PP_4562	Uncharacterized protein
Q88EA3	230860000	1.37173e+08	159150000	221430000	1.79723e+08	200620000	PP_4563	Uncharacterized protein
Q88E96	3.04563e+08	3.15137e+08	2.49993e+08	2.46807e+08	3.04507e+08	2.98963e+08	PP_4570	Uncharacterized protein
Q88E95	1950200000	1915700000	1409266667	1286966667	1962700000	1140500000	PP_4571	Cysteine synthase
Q88E93	7.67447e+08	1141433333	7.29107e+08	458570000	4.55493e+08	3.80897e+08	PP_4573	ATPase, AAA family
Q88E92	96780000	1.67943e+08	5.91033e+07	5.46673e+07	4.95827e+07	79265000	PP_4574	Uncharacterized protein
Q88E91	9.37367e+06	0	0	0	0	0	PP_4575	Urea amidolyase-related protein
Q88E85	9.25533e+06	2.30903e+07	3.20283e+07	6019000	0	17754000	PP_4581	Uncharacterized protein
Q88E84	0	0	0	0	0	5886000	PP_4582	Uncharacterized protein
Q88E83	1.16343e+08	2.82257e+08	129836000	1.33167e+08	2.75853e+08	1.37893e+08	PP_4583	Peptidase, putative
Q88E82	8.06837e+07	85328000	1.17543e+08	1.41173e+08	140080000	168530000	PP_4584	Uncharacterized protein
Q88E80	1797500	1.09457e+07	7.30967e+06	0	7.28167e+06	0	PP_4586	Uncharacterized protein
Q88E78	243010000	3.96207e+08	2.00997e+08	221460000	282020000	1.55744e+08	PP_4588	Nitroreductase family protein
Q88E76	0	0	0	9.49033e+06	0	0	PP_4590	YcgL domain-containing protein PP_4590
Q88E75	1.82043e+08	171540000	1.67747e+08	199700000	1.94373e+08	212340000	PP_4591	Ribonuclease D
Q88E73	0	0	0	0	0	1.08687e+07	PP_4593	Uncharacterized protein
Q88E72	1.87543e+08	2.31943e+08	1.74027e+08	2.23067e+08	2.10623e+08	180350000	PP_4594	Cystathionine gamma-synthase, putative
Q88E65	1.09213e+07	0	0	0	0	0	PP_4602	Transcriptional regulator, AraC family
Q88E64	0	0	0	0	0	9.21033e+06	PP_4604	Membrane protein, putative
Q88E52	0	0	0	0	0	10841000	PP_4616	Uncharacterized protein
Q88E49	14839000	0	1.36943e+07	0	0	0	PP_4619	Maleylacetoacetate isomerase, putative
Q88E48	2.12537e+08	1.61897e+08	128820000	8.35477e+07	8.84897e+07	8.15757e+07	PP_4620	Fumarylacetoacetase
Q88E47	6.33467e+07	3.07017e+07	3.43627e+07	5.36127e+07	5.16743e+07	19892000	PP_4621	Homogentisate 1,2-dioxygenase
Q88E46	4.44607e+07	1.71543e+07	0	0	0	0	PP_4622	Transcriptional regulator, IclR family
Q88E40	126938000	2.65633e+08	1.61483e+08	208390000	1.83323e+08	2.29637e+08	PP_4628	MioC protein
Q88E39	6.08767e+06	0	0	0	0	0	PP_4629	Sensory box protein
Q88E36	106734000	5.89397e+07	8.56143e+07	0	37982000	0	PP_4632	Oxidoreductase, short-chain dehydrogenase/reductase family
Q88E35	331850000	379930000	3.67727e+08	6.84897e+08	5.53527e+08	5.37207e+08	PP_4633	Uncharacterized protein
Q88E33	9043000000	7781933333	8240733333	6597566667	7096033333	7967200000	PP_4635	Enoyl-[acyl-carrier-protein] reductase [NADH]
Q88E32	17304000000	3265133333	4257166667	619840000	9.61933e+07	2.79313e+08	PP_4636	Beta-ketothiolase
Q88E29	1.95697e+08	2.53453e+08	176690000	245190000	244230000	1.77103e+08	PP_4639	CobW/P47K family protein
Q88E27	3.47477e+08	3.27057e+08	413890000	2.12763e+08	138500000	2.56233e+08	PP_4641	Carbon starvation protein CstA
Q88E26	0	0	0	0	0	1.83523e+07	PP_4642	Cyclic diguanosine monophosphate-binding protein
Q88E24	4.28167e+07	8.86097e+07	33794000	54374000	52737000	5.38143e+07	PP_4644	DNA repair protein radA
Q88E23	2.23153e+08	1.97093e+08	2.18197e+08	122424000	9.74153e+07	121430000	PP_4645	Large-conductance mechanosensitive channel
Q88E22	2.19937e+08	1.90297e+08	2.06777e+08	2.43247e+08	2.81077e+08	2.38517e+08	PP_4646	Ferredoxin--NADP+ reductase, putative
Q88E20	4.61103e+07	1.96997e+07	1.99493e+07	8.33533e+06	2.26897e+07	1.05047e+07	PP_4648	Ribosomal RNA large subunit methyltransferase G
Q88E17	2.00017e+08	16570000	1.79573e+07	17685000	0	0	PP_4651	Ubiquinol oxidase subunit I, cyanide insensitive
Q88E14	75655000	2.39567e+08	62601000	2.41273e+08	2.97617e+08	1.03253e+08	PP_4654	tRNA/tmRNA (uracil-C(5))-methyltransferase
Q88E11	290910000	7.78843e+07	8.55873e+07	4.01407e+07	2.65567e+07	49383000	PP_4657	Metallopeptidase, zinc binding
Q88E10	1.13395e+08	1.28653e+08	6.08403e+07	1.20353e+08	8.04837e+07	9.56503e+07	PP_4658	Methyl-accepting chemotaxis protein McpS
Q88E09	3310933333	4258666667	3331533333	7.00863e+08	7.43277e+08	6.83503e+08	PP_4659	Gamma-glutamyltransferase
Q88E02	22441333333	5857166667	6838200000	1404000000	712650000	1098266667	PP_4666	3-hydroxyisobutyrate dehydrogenase
Q88E01	39281000000	10302000000	11460333333	2888566667	8.60017e+08	1934066667	PP_4667	Methylmalonate semialdehyde dehydrogenase
Q88E00	0	0	0	0	0	4.38267e+07	PP_4668	Transcriptional regulator, LysR family
Q88DZ9	154760000	1.40437e+08	103606000	3.09313e+08	1.37353e+08	234550000	PP_4669	OmpA family protein
Q88DZ6	8344000	0	0	0	0	0	PP_4672	RecBCD enzyme subunit RecD
Q88DZ0	41172333333	21553333333	24524666667	17987000000	19234333333	16818333333	PP_4678	Ketol-acid reductoisomerase
Q88DY9	5372366667	1464266667	2051800000	8.82563e+08	1179756667	1017456667	PP_4679	Acetolactate synthase, small subunit
Q88DY8	14549000000	5319900000	6786633333	3551600000	3380700000	3756466667	PP_4680	Acetolactate synthase
Q88DY7	0	0	0	0	0	9.11333e+06	PP_4681	Uncharacterized protein
Q88DY6	1.90817e+08	1.32995e+08	2.43403e+08	1.10651e+08	1.36323e+08	1.76197e+08	PP_4682	Lipoprotein, putative
Q88DY5	4.63253e+07	4.67937e+07	90470000	4.79113e+07	4.64517e+07	51567000	PP_4683	Penicillin-binding protein 1B
Q88DY4	9.63463e+08	1779700000	1014490000	2019500000	2264666667	1549800000	PP_4684	Uncharacterized protein
Q88DY3	2.13047e+08	7.02093e+07	27553000	9.15933e+06	1.31563e+07	6.54467e+06	PP_4685	Uncharacterized protein
Q88DX9	0	0	0	0	9650000	0	PP_4689	Heme/hemin ABC transporter, periplasmic heme/hemin-binding protein
Q88DX6	1.05126e+08	1.25823e+08	79758000	1.20183e+08	115910000	9.94033e+07	PP_4692	Aminotransferase, class I
Q88DX5	9.35487e+08	2062566667	1701533333	1635966667	1749466667	1593500000	PP_4693	RNA polymerase-binding transcription factor DksA
Q88DX4	3.61677e+07	2.33927e+08	43979000	5.78997e+07	2.32593e+08	6.05583e+07	PP_4694	Glutamyl-Q tRNA(Asp) synthetase
Q88DX3	1.62673e+08	8.65033e+07	158100000	4.60067e+07	7.34233e+07	5.44167e+07	PP_4695	Sensory box histidine kinase
Q88DX2	6.70403e+08	7.64537e+08	568920000	5.95813e+08	667250000	5.51407e+08	PP_4696	Nitrogen regulation protein NR(I)
Q88DX1	4.47867e+08	3.04887e+08	310460000	4.47677e+08	3.32867e+08	404890000	PP_4697	Poly(A) polymerase I
Q88DW9	28214000	0	0	0	0	0	PP_4699	3-methyl-2-oxobutanoate hydroxymethyltransferase
Q88DW8	7911000	0	10797000	163790000	9.54217e+07	6.40267e+07	PP_4700	Pantothenate synthetase
Q88DW7	2412033333	1920166667	2289133333	2402166667	1784233333	2215866667	PP_4701	Glucose-6-phosphate isomerase 2
Q88DW6	7.79283e+08	3.08793e+08	5.63413e+08	2.34553e+08	1.87747e+08	2.37453e+08	PP_4702	Acetyl-coenzyme A synthetase 2
Q88DW4	865390000	491780000	7.53747e+08	4.32953e+08	250360000	4.55397e+08	PP_4704	Uncharacterized protein
Q88DW1	3623133333	8.08037e+08	4064400000	1111270000	1540133333	1773143333	PP_4707	OsmY-related protein
Q88DW0	6938066667	8393400000	8629766667	10047466667	11116000000	10561133333	PP_4708	Polyribonucleotide nucleotidyltransferase
Q88DV9	8.97227e+07	1.78412e+08	3.56128e+08	2.32164e+08	1.74193e+08	1.92697e+08	PP_4709	30S ribosomal protein S15
Q88DV8	1.50637e+08	162390000	1.56837e+08	1.46937e+08	204400000	200210000	PP_4711	Ribosome-binding factor A
Q88DV7	5944166667	8123733333	7911733333	9557900000	10497666667	10076033333	PP_4712	Translation initiation factor IF-2
Q88DV6	2071566667	2323400000	2337800000	2439533333	2087466667	2242000000	PP_4713	Transcription termination/antitermination protein NusA
Q88DV5	165310000	1.91787e+08	2.03513e+08	2.21477e+08	2.55637e+08	2.09703e+08	PP_4714	Ribosome maturation factor RimP
Q88DV4	5.19147e+08	629850000	626940000	1040293333	8.51877e+08	835220000	PP_4715	Triosephosphate isomerase
Q88DV3	5.23583e+08	5.00787e+08	5.30003e+08	863620000	796910000	8.25453e+08	PP_4716	Phosphoglucosamine mutase
Q88DV2	29932000	3.26853e+07	23642000	0	4.65883e+07	2.33257e+07	PP_4717	Dihydropteroate synthase
Q88DV1	1612566667	1649700000	1589933333	1652633333	1506400000	1886900000	PP_4718	ATP-dependent zinc metalloprotease FtsH
Q88DV0	1.66063e+08	1.69583e+08	153180000	2.51897e+08	1.75743e+08	1.97973e+08	PP_4719	Ribosomal RNA large subunit methyltransferase E
Q88DU9	416180000	408690000	4.05443e+08	4.79673e+08	3.86517e+08	4.01437e+08	PP_4720	Uncharacterized protein
Q88DU7	1727500000	2461466667	2001600000	2219766667	2259300000	2087933333	PP_4722	Transcription elongation factor GreA
Q88DU6	5078833333	6466900000	6630200000	11329333333	11286333333	10553366667	PP_4723	Carbamoyl-phosphate synthase large chain
Q88DU5	1644700000	1815866667	2078366667	2294533333	2873933333	2365700000	PP_4724	Carbamoyl-phosphate synthase small chain
Q88DU4	889980000	1051643333	1022053333	1413266667	1378933333	1470433333	PP_4725	4-hydroxy-tetrahydrodipicolinate reductase
Q88DU3	7.95303e+08	1171733333	1253866667	1287566667	1416900000	1575800000	PP_4726	Chaperone protein DnaJ
Q88DU2	17058666667	23136333333	26421666667	32217666667	30534666667	34891000000	PP_4727	Chaperone protein DnaK
Q88DU1	2123233333	3226166667	3012600000	4878600000	4389133333	5081666667	PP_4728	Protein GrpE
Q88DU0	3.30877e+07	61708000	5.32123e+07	78777000	1.29754e+08	6.65313e+07	PP_4729	DNA repair protein RecN
Q88DT9	4.26537e+08	2.26447e+08	2.38817e+08	1.84623e+08	153570000	1.50983e+08	PP_4730	Transcriptional regulator Fur
Q88DT8	2.30777e+08	125220000	187180000	4.08293e+08	1.91753e+08	2.72753e+08	PP_4731	Outer membrane protein assembly factor BamE
Q88DT7	1.52667e+07	0	0	0	0	0	PP_4732	Uncharacterized protein
Q88DT6	1.41213e+08	1.27053e+08	2.22117e+08	1.40573e+08	1.29433e+08	168250000	PP_4733	SsrA-binding protein
Q88DT3	0	0	0	0	0	5.39733e+06	PP_4736	L-lactate dehydrogenase
Q88DT1	453720000	6.56923e+07	7.85857e+08	1.86987e+08	201580000	209870000	PP_4738	Uncharacterized protein
Q88DS9	2.98323e+07	25396000	2.53613e+07	5240000	5.25867e+06	1.61927e+07	PP_4740	Type I restriction-modification system, R subunit
Q88DS8	1.21593e+08	1.50643e+08	121887000	354890000	250910000	2.62223e+08	PP_4741	Type I restriction-modification system, M subunit
Q88DS7	1.05206e+08	1.24503e+08	1.09838e+08	3.09493e+08	2.22257e+08	2.75153e+08	PP_4742	Type I restriction-modification system, S subunit
Q88DS5	3.29153e+08	5.70927e+08	4.50813e+08	5.11407e+08	483600000	5.20083e+08	PP_4748	Amino acid ABC transporter, periplasmic amino acid-binding protein
Q88DS0	1.54637e+08	3.01103e+08	217270000	64180000	2.47297e+08	1.62437e+08	PP_4753	N-methylproline demethylase, putative
Q88DR3	2.02333e+08	2.28443e+08	1.20473e+08	4.20833e+07	4.97433e+07	4.55697e+07	PP_4760	Alcohol dehydrogenase, zinc-containing
Q88DR1	142720000	134510000	1.61017e+08	1.80177e+08	1.23803e+08	1.77053e+08	PP_4762	Acyl-CoA thioesterase II
Q88DQ7	315800000	2.33277e+08	2.44993e+08	2.68787e+08	225300000	2.66847e+08	PP_4766	ATP-dependent RNA helicase, DEAD box family
Q88DQ3	8.09907e+07	9.66757e+07	6.33587e+07	1.30817e+08	5.20883e+07	95433000	PP_4770	Uncharacterized protein
Q88DP7	9.92337e+07	1.31856e+08	6.83613e+07	60514000	63295000	30214000	PP_4776	Transcriptional regulator, AsnC family
Q88DP5	7.14123e+08	7.62213e+08	727780000	706440000	5.87917e+08	613570000	PP_4779	AMP nucleosidase
Q88DP4	2.28877e+08	3.76643e+08	5.69453e+07	2.23737e+07	36093000	1.81313e+07	PP_4780	Acyl-CoA dehydrogenase, putative
Q88DP2	1.10838e+08	1.12607e+08	1.64373e+08	229440000	135175000	1.52473e+08	PP_4782	Phosphomethylpyrimidine kinase
Q88DP1	115620000	119430000	1.08888e+08	1.31173e+08	98885000	1.09877e+08	PP_4783	Thiamine-phosphate synthase
Q88DP0	1808966667	1446866667	1632700000	1560800000	1435000000	1615033333	PP_4784	Glutamate-1-semialdehyde 2,1-aminomutase
Q88DN9	1.93913e+07	0	0	0	0	0	PP_4785	Uncharacterized protein
Q88DN7	2.92243e+08	2.94297e+08	335580000	4.22677e+08	3.39283e+08	4.29093e+08	PP_4787	PhoH family protein
Q88DN6	1.27977e+08	1.11357e+08	123820000	1.61957e+08	1.41483e+08	1.40413e+08	PP_4788	Endoribonuclease YbeY
Q88DN5	4.64153e+08	2.89173e+08	447360000	5.06047e+08	4.58613e+08	534890000	PP_4789	Metal ion transporter, putative
Q88DN4	0	0	0	0	0	2.65863e+07	PP_4790	Apolipoprotein N-acyltransferase
Q88DN1	2991566667	3400033333	3258900000	6582500000	6890800000	5988966667	PP_4794	Leucine--tRNA ligase
Q88DN0	9.61117e+08	1008243333	776640000	1397633333	1522366667	1243366667	PP_4795	LPS-assembly lipoprotein LptE
Q88DM7	1085346667	6.17307e+08	8.40803e+08	6.31287e+08	407240000	6.28513e+08	PP_4798	Membrane-bound lytic murein transglycosylase, putative
Q88DM6	1.21357e+07	0	0	0	0	0	PP_4799	Muramoyltetrapeptide carboxypeptidase, putative
Q88DM5	4.25363e+08	730870000	752180000	1529266667	1295000000	1363100000	PP_4800	Lipoyl synthase
Q88DM4	0	3.67233e+07	1.14847e+08	30821000	34780000	0	PP_4801	Octanoyltransferase
Q88DM3	409430000	3.62887e+08	3.77243e+08	3.21973e+08	4.15777e+08	4.18447e+08	PP_4802	UPF0250 protein PP_4802
Q88DM2	1289533333	2018866667	1952600000	2477133333	2161933333	2465333333	PP_4803	D-alanyl-D-alanine carboxypeptidase
Q88DM1	4.87457e+07	1.47477e+08	7.66593e+07	8.91243e+07	9.30037e+07	83076000	PP_4804	Lipoprotein, rare lipoprotein A family
Q88DL6	229250000	2.64477e+08	2.67037e+08	3.63237e+08	2.80613e+08	325200000	PP_4809	Ribosomal silencing factor RsfS
Q88DL5	0	0	0	20772000	0	45817000	PP_4810	Probable nicotinate-nucleotide adenylyltransferase
Q88DL4	451450000	5.27767e+08	4.59637e+08	720070000	3.71033e+08	5.51007e+08	PP_4811	Gamma-glutamyl phosphate reductase
Q88DL2	0	0	0	0	0	3135300	PP_4813	PAP2 family protein/DedA family protein
Q88DL1	0	0	0	0	0	7.97567e+06	PP_4814	ATP-dependent protease La domain protein
Q88DK8	1.01824e+08	7.69497e+07	0	0	0	0	PP_4817	MaoC domain protein
Q88DK7	6.75657e+07	5.20113e+07	7.60787e+07	135250000	5.49917e+07	76420000	PP_4818	Ribosomal protein L11 methyltransferase
Q88DK6	1.05575e+08	94810000	1.0233e+08	1.01977e+08	70169000	91693000	PP_4819	Uncharacterized protein
Q88DK4	7.05323e+07	1.0725e+08	1.07337e+08	1.30347e+08	88025000	1.08106e+08	PP_4821	DNA-binding protein Fis
Q88DK3	1877800000	2762966667	2823266667	5669300000	5534400000	6050133333	PP_4822	Bifunctional purine biosynthesis protein PurH
Q88DK2	6.79207e+08	954440000	9.21417e+08	2016533333	1463200000	1680000000	PP_4823	Phosphoribosylamine--glycine ligase
Q88DJ1	5.47877e+07	8.72003e+07	99426000	293330000	9.65717e+07	201270000	PP_4834	SPFH domain/Band 7 family protein
Q88DI9	5.44453e+07	16153000	25006000	1.42143e+07	6291000	1.40153e+07	PP_4836	Uncharacterized protein
Q88DH8	33780000	109149000	1.23083e+08	84470000	94020000	1.23907e+08	PP_4847	Chaperone modulatory protein CbpM
Q88DH7	1271166667	1115033333	9.88543e+08	6.74693e+08	566620000	655220000	PP_4848	Curved DNA-binding protein
Q88DH6	0	0	0	0	2.21123e+07	0	PP_4849	DnaK protein, putative
Q88DH4	234330000	6.50663e+07	1.18467e+08	1.32747e+07	2.56827e+07	2.23773e+07	PP_4851	Phosphate starvation-inducible protein, PSIF
Q88DH0	3.17617e+08	5.72457e+07	632480000	7.65543e+07	8.85143e+07	101990000	PP_4855	Osmotically-inducible lipoprotein OsmE
Q88DG9	7.78587e+07	7.39487e+07	757010000	1.98897e+08	75144000	1.65532e+08	PP_4856	Bacterioferritin, putative
Q88DG8	4.14547e+07	3.39603e+07	6.17563e+07	41486000	3.12173e+07	4.18797e+07	PP_4857	Uncharacterized protein
Q88DG3	3.84373e+08	307650000	3.42127e+08	453280000	2.83387e+08	3.61777e+08	PP_4862	Oxidoreductase, short chain dehydrogenase/reductase family
Q88DG2	45567000	444580000	121230000	36026000	3.63793e+07	44757000	PP_4863	High-affinity branched-chain amino acid transport ATP-binding protein
Q88DG1	0	303170000	8.48687e+07	3.06123e+07	2.82453e+07	1.44087e+07	PP_4864	Branched-chain amino acid ABC transporter, ATP-binding protein
Q88DF9	0	1.08977e+07	0	0	0	0	PP_4866	Branched-chain amino acid ABC transporter, permease protein
Q88DF8	7199533333	21363000000	7582266667	2316033333	2359400000	2500000000	PP_4867	Branched-chain amino acid ABC transporter, periplasmic amino acid-binding protein
Q88DF6	710310000	8.36917e+08	663860000	8.95587e+08	7.69093e+08	7.58573e+08	PP_4869	NH(3)-dependent NAD(+) synthetase
Q88DF5	36749000000	33503333333	40920666667	24772000000	19244666667	26561333333	PP_4870	Azurin
Q88DF4	2.28223e+08	342510000	3.11777e+08	4.43713e+08	3.57453e+08	404170000	PP_4871	Cytokinin riboside 5'-monophosphate phosphoribohydrolase
Q88DF3	0	48550000	4.96737e+07	112802000	7.51253e+07	1.07007e+08	PP_4872	UPF0313 protein PP_4872
Q88DF2	203950000	162910000	173340000	1.61993e+08	1.70773e+08	1.67607e+08	PP_4873	Replicative DNA helicase
Q88DF1	7150466667	10633433333	11954333333	23190666667	20207000000	19859666667	PP_4874	50S ribosomal protein L9
Q88DE9	3810966667	5377666667	5486500000	10315300000	11900000000	9443700000	PP_4876	30S ribosomal protein S18
Q88DE8	6637500000	6658200000	8042466667	9373800000	9523666667	9222933333	PP_4877	30S ribosomal protein S6
Q88DE7	2.91883e+08	4.31413e+08	2.77873e+08	264730000	449810000	2.67227e+08	PP_4879	23S rRNA (guanosine-2'-O-)-methyltransferase RlmB
Q88DE6	1440266667	1763866667	1181100000	1448466667	2017666667	1166200000	PP_4880	Ribonuclease R
Q88DE5	2.20657e+08	212890000	2.32453e+08	4.04113e+08	303820000	3.73797e+08	PP_4881	Iron ABC transporter, periplasmic iron-binding protein, putative
Q88DD9	1.81017e+08	512360000	8.05573e+07	8.53677e+07	57094000	70007000	PP_4888	Methyl-accepting chemotaxis transducer, putative
Q88DD8	1730933333	1108966667	1762000000	2453733333	2265666667	2683100000	PP_4889	Adenylosuccinate synthetase
Q88DD7	5.70043e+08	4.17967e+08	6.03623e+08	1258333333	8.12777e+08	9.83243e+08	PP_4890	ATP phosphoribosyltransferase regulatory subunit
Q88DD6	1781066667	1757666667	1442400000	1474166667	1061053333	1220166667	PP_4891	Protein HflC
Q88DD5	2422466667	2374833333	1930633333	2041666667	1632400000	1917166667	PP_4892	HflK protein
Q88DD4	1.50313e+08	132860000	1.51927e+08	2.00397e+08	1.87913e+08	2.01127e+08	PP_4893	GTPase HflX
Q88DD3	0	0	10111000	0	0	2.39783e+07	PP_4894	RNA-binding protein Hfq
Q88DD1	9.33793e+07	120130000	9.88813e+07	1.32193e+08	1.21077e+08	1.19133e+08	PP_4896	DNA mismatch repair protein MutL
Q88DD0	74892000	5.46873e+07	1.16173e+08	1.15466e+08	1.08887e+08	117860000	PP_4897	N-acetylmuramoyl-L-alanine amidase
Q88DC9	289420000	2.70403e+08	2.55327e+08	3.55047e+08	323160000	3.26293e+08	PP_4898	Uncharacterized protein
Q88DC8	0	0	1740300	0	0	0	PP_4899	ADP-dependent (S)-NAD(P)H-hydrate dehydratase
Q88DC5	137990000	231350000	1.96277e+08	1.76003e+08	1.56003e+08	1.61217e+08	PP_4902	Oligoribonuclease
Q88DC4	0	0	1.69727e+07	0	0	0	PP_4903	Putative ribosome biogenesis GTPase RsgA
Q88DC3	1.93403e+08	98225000	6.09473e+07	142580000	74249000	92517000	PP_4904	Motility protein, MotB family
Q88DC2	0	0	0	0	0	5933000	PP_4905	Motility protein, MotA family
Q88DC1	9.03717e+07	9.65553e+07	8.11823e+07	6.66543e+07	8.02467e+07	7.88983e+07	PP_4906	Uncharacterized protein
Q88DC0	269760000	3.67967e+08	3.03367e+08	2.78473e+08	3.18663e+08	2.93653e+08	PP_4907	Sulfurtransferase
Q88DB9	1.93753e+08	2.20947e+08	1.92127e+08	332620000	2.39927e+08	258800000	PP_4908	Phosphatidylserine decarboxylase proenzyme
Q88DB8	3.40047e+08	3.17657e+08	326330000	7.74173e+08	604100000	549920000	PP_4909	Phosphoserine phosphatase
Q88DB7	3.00327e+08	222860000	1.84093e+08	239200000	1.63923e+08	1.81847e+08	PP_4910	Uncharacterized protein
Q88DB6	1.28299e+08	1.43627e+08	1.79667e+08	158070000	8.55927e+07	1.38459e+08	PP_4911	Uncharacterized protein
Q88DB5	2.78757e+08	455210000	2.40413e+08	2.66157e+08	401210000	2.69087e+08	PP_4912	DNA topoisomerase 4 subunit A
Q88DB2	288020000	5.68193e+08	287370000	394460000	4.89303e+08	3.04537e+08	PP_4915	DNA topoisomerase 4 subunit B
Q88DA8	279170000	1.20619e+08	2.10913e+08	1.48117e+08	1.43627e+07	122500000	PP_4919	MutT/nudix family protein
Q88DA7	5.53177e+07	64311000	1.92833e+08	68863000	6.06927e+07	92697000	PP_4920	Lipoprotein, putative
Q88DA6	0	0	0	0	0	1.08597e+07	PP_4921	Transporter, NCS1 nucleoside transporter family
Q88DA5	1233400000	1809333333	1962866667	4116700000	2982700000	3594733333	PP_4922	Phosphomethylpyrimidine synthase
Q88D96	182140000	1.30924e+08	152180000	9.82563e+07	74032000	1.49966e+08	PP_4931	Uncharacterized protein
Q88D95	166960000	8.73163e+07	8.56883e+07	3.37473e+07	1.80273e+07	61818000	PP_4932	Uncharacterized protein
Q88D93	350840000	2.72527e+08	3.04473e+08	377900000	2.63647e+08	3.16933e+08	PP_4934	Bifunctional protein HldE
Q88D92	128942000	1.19937e+08	1.32613e+08	1.16586e+08	9.71243e+07	108600000	PP_4935	ABC efflux transporter, permease/ATP-binding protein, putative
Q88D90	0	4.18607e+07	3.80247e+07	1.82393e+07	0	1.09253e+07	PP_4937	Toluene tolerance protein
Q88D88	1.43967e+08	1.34843e+08	1.33147e+08	1.27937e+08	93867000	112220000	PP_4939	Uncharacterized protein
Q88D87	0	0	0	0	0	1.24857e+07	PP_4940	Uncharacterized protein
Q88D84	6.30067e+07	2.07763e+08	1.44743e+08	227660000	1.58713e+08	202120000	PP_4943	Glycosyl transferase, putative
Q88D83	8.48947e+08	829180000	799160000	1227473333	7.74027e+08	1219533333	PP_4944	Carbamoyltransferase, NodU family
Q88D82	4.19633e+07	5.16067e+07	4.79333e+07	242170000	1.41183e+08	49950000	PP_4945	Ribosomal RNA large subunit methyltransferase J
Q88D80	1219566667	8.65253e+08	698100000	1006270000	8.32067e+08	864590000	PP_4947	Bifunctional protein PutA
Q88D79	0	0	0	0	1984700	0	PP_4948	Acyl-CoA dehydrogenase family protein
Q88D78	179146000	1.72075e+08	1.01453e+08	1.38517e+08	75944000	9.62063e+07	PP_4949	TldD/PmbA family protein
Q88D75	8.44403e+07	6.84537e+07	83562000	48419000	8.46783e+07	9.94513e+07	PP_4952	ATP-dependent RNA helicase DbpA
Q88D72	4.31033e+06	0	0	0	0	0	PP_4955	Uncharacterized protein
Q88D68	9.68563e+08	3.87607e+08	298500000	1.27847e+08	52635000	145160000	PP_4959	Sensory box protein/response regulator
Q88D67	5334700000	5171100000	6569466667	5717700000	4240766667	4660333333	PP_4960	Fructose-1,6-bisphosphate aldolase
Q88D65	1.02017e+07	0	0	0	0	0	PP_4962	Uncharacterized protein
Q88D64	2656233333	2088666667	3176566667	3422966667	2482666667	3519400000	PP_4963	Phosphoglycerate kinase
Q88D63	6.70857e+07	6.00623e+07	7.22357e+07	1.12143e+08	7.44387e+07	107813000	PP_4964	D-erythrose-4-phosphate dehydrogenase
Q88D62	3849000000	2576866667	3748200000	4821366667	3386166667	4666233333	PP_4965	Transketolase
Q88D61	41200000	153400000	4.74723e+07	2.09807e+08	7.70243e+07	9.13327e+07	PP_4966	Transcriptional regulator, ArsR family
Q88D60	2756400000	9379700000	4249766667	7188566667	4797600000	7203533333	PP_4967	S-adenosylmethionine synthase
Q88D59	0	0	0	0	0	6.03133e+07	PP_4968	DNA ligase B
Q88D58	6.09053e+08	6.28357e+08	515210000	3.34897e+08	5.20097e+08	3.76557e+08	PP_4969	Uncharacterized protein
Q88D52	206300000	1.54903e+08	155670000	176400000	174920000	176620000	PP_4975	Long-chain acyl-CoA thioester hydrolase family protein
Q88D51	4.65767e+08	1533666667	7.06113e+08	1864566667	8.61577e+08	1391700000	PP_4977	Methylenetetrahydrofolate reductase
Q88D49	824233	0	0	0	0	0	PP_4979	Periplasmic binding protein, putative
Q88D48	665080000	9.53947e+08	9.69303e+08	1855766667	1647733333	1872766667	PP_4980	ATP-dependent RNA helicase RhlE
Q88D47	1501166667	1887100000	2630133333	1094360000	6.64373e+08	1496133333	PP_4981	UPF0312 protein PP_4981
Q88D45	2.10237e+08	2.77267e+08	264170000	5.53277e+08	3.47737e+08	381790000	PP_4983	Flavin-containing monamine oxidase family protein
Q88D44	3.37217e+08	5.81657e+08	332230000	2.86553e+08	4.32843e+08	3.80253e+08	PP_4984	Adenosylmethionine-8-amino-7-oxononanoate aminotransferase
Q88D43	73376000	1.63887e+08	1.10963e+08	1.24203e+08	2.15943e+08	1.0167e+08	PP_4985	Ribosomal RNA small subunit methyltransferase E
Q88D39	1.22117e+07	0	0	0	0	0	PP_4989	Type IV pili methyl-accepting chemotaxis transducer PilJ
Q88D37	769030000	6.18953e+08	540200000	6.25747e+08	5.79357e+08	667850000	PP_4991	Type IV pili response regulator PilH
Q88D35	427560000	7.39873e+08	322610000	3.34417e+08	5.08163e+08	3.20263e+08	PP_4993	Glutathione synthetase
Q88D31	7.61183e+07	79369000	83648000	1.13654e+08	1.00553e+08	84078000	PP_4997	Transcriptional regulator PyrR
Q88D30	3.92277e+08	560910000	5.79313e+08	6.84453e+08	600670000	611650000	PP_4998	Aspartate carbamoyltransferase
Q88D29	5.21213e+08	7.43453e+08	6.92483e+08	9.45213e+08	1014040000	8.86373e+08	PP_4999	Dihydroorotase
Q88D28	197180000	224300000	2.93257e+08	4.29103e+08	5.22147e+08	5.93207e+08	PP_5000	ATP-dependent protease subunit HslV
Q88D27	1533733333	2118433333	2078666667	3214866667	3285100000	3523033333	PP_5001	ATP-dependent protease ATPase subunit HslU
Q88D26	77150000	110185000	1.02813e+08	3.40367e+07	23995000	0	PP_5002	Uncharacterized protein
Q88D25	727080000	5.09997e+08	4.80177e+08	1.83803e+08	9.58007e+07	144750000	PP_5003	Poly(3-hydroxyalkanoate) polymerase 1
Q88D23	204910000	1.51623e+08	9.90503e+07	60708000	5.55553e+07	6.56873e+07	PP_5005	Poly(3-hydroxyalkanoate) polymerase 2
Q88D21	7979266667	4317366667	3717900000	1208733333	2038366667	1268766667	PP_5007	Polyhydroxyalkanoate granule-associated protein GA2
Q88D17	2.67473e+08	2.58933e+08	2.30587e+08	363060000	261020000	283660000	PP_5011	Ubiquinone/menaquinone biosynthesis C-methyltransferase UbiE
Q88D16	0	0	0	0	0	11780000	PP_5012	Uncharacterized protein
Q88D15	1.66833e+08	2.30203e+08	0	4.19287e+08	307160000	3.11973e+08	PP_5014	Phosphoribosyl-AMP cyclohydrolase
Q88D14	0	0	4.20967e+07	6.43087e+07	7.56087e+07	0	PP_5015	Phosphoribosyl-ATP pyrophosphatase
Q88D10	0	0	2375800	0	0	0	PP_5019	Ribosomal RNA small subunit methyltransferase E
Q88D09	5514600000	3551433333	1539366667	2433633333	1809733333	2077466667	PP_5020	Methyl-accepting chemotaxis transducer
Q88D07	0	0	0	0	0	3.07777e+07	PP_5022	Amino acid ABC transporter, ATP-binding protein
Q88D06	0	0	0	0	0	8.34367e+06	PP_5023	Amino acid ABC transporter, permease protein
Q88D05	1.27304e+08	150410000	5.31547e+07	7.67107e+07	8.31663e+07	74255000	PP_5024	Amino acid ABC transporter, periplasmic amino acid-binding protein
Q88D04	8.87273e+07	101996000	2.26937e+08	1.68643e+08	1.43357e+08	1.67587e+08	PP_5025	Glucans biosynthesis glucosyltransferase H
Q88D03	7.33387e+08	7.18573e+08	1284033333	1325866667	820650000	1197900000	PP_5026	Glucans biosynthesis protein G
Q88D01	780680000	5.06123e+08	5.07193e+08	5.79087e+08	3.63757e+08	4.72323e+08	PP_5028	Proline iminopeptidase
Q88CZ5	8.94063e+07	1.68817e+08	8.60773e+07	1.24527e+08	1.08264e+08	109670000	PP_5034	Uncharacterized protein
Q88CZ4	8.21473e+07	1.31183e+08	9.45287e+07	9.72233e+07	1.04853e+08	7.87203e+07	PP_5035	Histidine utilization repressor
Q88CZ2	0	0	8.49147e+07	0	0	0	PP_5037	Outer membrane lipoprotein Blc, putative
Q88CZ1	0	0	0	0	0	27042000	PP_5038	Uncharacterized protein
Q88CZ0	279710000	2.42207e+08	2.62937e+08	245750000	100248000	1.90487e+08	PP_5039	Uncharacterized protein
Q88CY9	1296566667	1149143333	1537033333	1694233333	1681266667	1759366667	PP_5040	Fructose-1,6-bisphosphatase class 1
Q88CY8	1129833333	6.42507e+08	729010000	1.40513e+08	101747000	1.24527e+08	PP_5041	Alpha-1,4 glucan phosphorylase
Q88CY5	2184100000	3712700000	3733566667	6496600000	7578266667	6614166667	PP_5044	GTP-binding protein TypA/BipA
Q88CY3	13557000000	8577400000	13857333333	12119000000	14100333333	13437666667	PP_5046	Glutamine synthetase
Q88CY1	249370000	1.80433e+08	142780000	238940000	315000000	1.92107e+08	PP_5048	Two-component response regulator NtrC
Q88CX8	4.33657e+07	3.27363e+07	6.24213e+07	0	0	2.05853e+07	PP_5052	tRNA (cytidine(34)-2'-O)-methyltransferase
Q88CX7	1779700000	2901133333	2327133333	3725100000	3067333333	2911133333	PP_5053	Protein-export protein SecB
Q88CX6	67704000	7.22773e+07	8.00213e+07	8.73633e+07	74777000	1.15612e+08	PP_5054	Glutaredoxin
Q88CX5	3.00693e+08	2.80687e+08	3.03173e+08	3.95593e+08	348400000	3.93767e+08	PP_5055	Rhodanese domain protein
Q88CX4	9.18347e+08	1465966667	1471733333	2645366667	1711133333	2330866667	PP_5056	2,3-bisphosphoglycerate-independent phosphoglycerate mutase
Q88CX3	242530000	188290000	1.92773e+08	203090000	1.61607e+08	1.73603e+08	PP_5057	Peptidase, M23/M37 family
Q88CX2	1885366667	1465100000	1393333333	1822733333	2152866667	1940066667	PP_5058	Carboxyl-terminal protease
Q88CW7	1.98183e+08	254790000	2.05753e+08	1.33397e+08	1.56163e+08	1.36643e+08	PP_5063	NAD/NADP-dependent betaine aldehyde dehydrogenase
Q88CW6	1.12467e+08	1.25557e+08	9.35607e+07	78552000	6.61783e+07	7.39307e+07	PP_5064	Oxygen-dependent choline dehydrogenase
Q88CW3	1.21033e+07	0	5884000	8.36433e+06	0	0	PP_5067	Potassium efflux system protein KefA, putative
Q88CW2	1.08427e+07	9136000	0	0	0	0	PP_5068	UPF0061 protein PP_5068
Q88CW1	107870000	126761000	1.04195e+08	183980000	1.33518e+08	133660000	PP_5069	Thioredoxin 2
Q88CW0	3.59813e+08	191390000	231190000	2.42207e+08	1.21047e+08	2.15337e+08	PP_5070	ParA family protein
Q88CV6	1.69787e+08	2.02477e+08	160070000	2.73167e+08	235780000	2.42693e+08	PP_5074	Uroporphyrinogen decarboxylase
Q88CV5	1432500000	1009656667	1111950000	2217933333	2429900000	1945300000	PP_5075	Glutamate synthase, small subunit
Q88CV4	7400666667	6010466667	6358600000	12355666667	13219333333	10451200000	PP_5076	Glutamate synthase, large subunit
Q88CV3	5.22197e+08	8.18377e+08	7.42047e+08	7.11287e+08	8.04733e+08	7.49337e+08	PP_5077	Uncharacterized protein
Q88CV2	324280000	5.31923e+08	3.70817e+08	4.30553e+08	4.87557e+08	4.54193e+08	PP_5078	3-dehydroquinate synthase
Q88CU6	1.71613e+08	1.34697e+08	1.78817e+08	2.72063e+08	179060000	218380000	PP_5084	Penicillin-binding protein
Q88CU5	8441266667	19242333333	12185000000	17348666667	26730000000	14772000000	PP_5085	Malic enzyme
Q88CU3	9.96257e+08	1353116667	2134100000	2278633333	4877433333	2493966667	PP_5087	50S ribosomal protein L31
Q88CU1	1328766667	2126266667	1624166667	2250533333	2586633333	1932733333	PP_5089	Arginine--tRNA ligase
Q88CU0	188420000	2.36357e+08	170280000	140600000	2.60253e+08	1.87173e+08	PP_5090	Uncharacterized protein
Q88CT6	308920000	2.12897e+08	270440000	2.25477e+08	2.45287e+08	2.47703e+08	PP_5094	Uncharacterized protein
Q88CT5	556540000	6.11387e+08	641410000	873650000	554990000	7.17233e+08	PP_5095	Pyrroline-5-carboxylate reductase
Q88CT3	1.44353e+08	1.20467e+08	1.61077e+08	2.20687e+08	189020000	1.85823e+08	PP_5097	Homoserine O-acetyltransferase
Q88CT2	7.60343e+07	1.00762e+08	98627000	1.30163e+08	110334000	155400000	PP_5098	Methionine biosynthesis protein
Q88CT1	3.62917e+08	103661000	1.80207e+08	7.97713e+07	9.75653e+07	1.43483e+08	PP_5099	Uncharacterized protein
Q88CT0	177380000	1.91927e+08	151740000	2.65597e+08	278060000	2.38113e+08	PP_5100	Non-canonical purine NTP pyrophosphatase
Q88CS9	0	99901000	9.47477e+07	1.14047e+08	1.22073e+08	1.10014e+08	PP_5101	Oxygen-independent coproporphyrinogen III oxidase, putative
Q88CS7	0	0	0	751167	0	0	PP_5103	tRNA (guanine-N(7)-)-methyltransferase
Q88CS6	867980000	6.69403e+08	704320000	7.98257e+08	7.80277e+08	7.92137e+08	PP_5104	Thiazole synthase
Q88CS5	0	0	0	3.05147e+07	0	0	PP_5105	Uncharacterized protein
Q88CS1	82342000	8.33937e+07	5.43277e+07	58110000	60316000	7.67757e+07	PP_5109	Cell division protein FtsX
Q88CS0	0	0	2.41857e+07	0	0	0	PP_5110	Cell division ABC transporter, ATP-binding protein FtsE
Q88CR9	4.49087e+08	553350000	428360000	5.74527e+08	6.68023e+08	5.08953e+08	PP_5111	Signal recognition particle receptor FtsY
Q88CR8	209080000	220810000	2.21613e+08	1.52797e+08	163520000	1.52677e+08	PP_5112	Zinc protease, putative
Q88CR7	1.66447e+08	2.14993e+08	179940000	1.76343e+08	162300000	177790000	PP_5113	Uncharacterized protein
Q88CR6	8.73267e+07	1.62583e+08	1.17847e+08	2.23087e+08	1.65347e+08	1.76533e+08	PP_5114	Ribosomal RNA small subunit methyltransferase D
Q88CR2	5.91623e+08	6.29463e+08	5.21677e+08	8.62357e+08	735610000	634900000	PP_5118	Thiosulfate sulfurtransferase, putative
Q88CR0	13764000	7.03607e+07	2.17663e+07	16535000	20011000	17300000	PP_5120	Aldehyde dehydrogenase
Q88CQ7	1089500000	1172433333	8.88683e+08	1210626667	1060233333	1022676667	PP_5123	Phosphopantetheine adenylyltransferase
Q88CQ4	0	0	0	2.88467e+07	0	0	PP_5126	Uncharacterized protein
Q88CQ3	1.94447e+08	2.08713e+08	1.51547e+08	176560000	1.80953e+08	181870000	PP_5127	Uncharacterized protein
Q88CQ2	9732000000	7030933333	6781900000	6669766667	7157900000	5865800000	PP_5128	Dihydroxy-acid dehydratase
Q88CP9	0	1.65237e+07	0	0	0	0	PP_5131	Sodium:dicarboxylate symporter family protein
Q88CP8	4.40847e+07	2.63523e+07	3.67623e+07	3.89597e+07	2.15803e+07	3.73797e+07	PP_5132	Dihydrofolate reductase
Q88CP6	0	0	7.45433e+06	0	0	0	PP_5134	Uncharacterized protein
Q88CP1	0	0	0	0	0	7.09767e+06	PP_5139	Cadmium translocating P-type ATPase
Q88CN9	0	0	0	0	0	1.46303e+07	PP_5141	Thymidylate synthase
Q88CN6	0	0	0	0	0	5.19133e+06	PP_5144	Uncharacterized protein
Q88CN5	951080000	792220000	546800000	5.14957e+08	499610000	4.26583e+08	PP_5145	Phosphoenolpyruvate-protein phosphotransferase PtsP
Q88CN3	1.03567e+08	199570000	160880000	99110000	144330000	1.29134e+08	PP_5147	Hydrolase, haloacid dehalogenase-like family
Q88CN1	195790000	2.97913e+08	2.53573e+08	5.14167e+08	5.11967e+08	418010000	PP_5149	L-threonine dehydratase
Q88CN0	2.90823e+08	2.69457e+08	2.63427e+08	413830000	3.56993e+08	400550000	PP_5150	Ribose-5-phosphate isomerase A
Q88CM8	0	1.47237e+07	0	0	0	0	PP_5152	Uncharacterized protein
Q88CM7	3.04277e+08	2.14767e+08	188040000	1.51282e+08	160980000	139190000	PP_5153	Fumarylacetoacetate hydrolase family protein
Q88CM6	284280000	3.14487e+08	225140000	174100000	1.78517e+08	149060000	PP_5154	Oxidoreductase, FAD-binding, putative
Q88CM5	5890766667	7168300000	6449100000	9694833333	9359933333	9089333333	PP_5155	D-3-phosphoglycerate dehydrogenase
Q88CM4	1628366667	2041266667	1775166667	7.15333e+08	7.74113e+08	896430000	PP_5156	Uncharacterized protein
Q88CM3	7.42283e+07	1.86133e+08	1.65777e+08	1.17943e+08	117379000	1.32417e+08	PP_5157	Conserved domain protein
Q88CM0	0	0	0	0	0	1.77353e+07	PP_5160	Uncharacterized protein
Q88CL7	6.38757e+07	170200000	151120000	8.45943e+07	62740000	7.29993e+07	PP_5163	Acetyltransferase, CysE/LacA/LpxA/NodL family
Q88CL5	464460000	5.68673e+08	569940000	9.31477e+08	738740000	973600000	PP_5165	Lipoprotein, putative
Q88CL2	498180000	3.87963e+08	3.20667e+08	2.39763e+08	2.49667e+08	2.98893e+08	PP_5168	Sulfate/thiosulfate import ATP-binding protein CysA
Q88CK9	4.82687e+07	2.07523e+07	4.65813e+07	8.51877e+07	2.25013e+07	5.13157e+07	PP_5171	Sulfate ABC transporter, periplasmic sulfate-binding protein
Q88CK7	145425000	5.14823e+07	5.83703e+07	2.69197e+07	9.44533e+06	0	PP_5173	RND efflux transporter
Q88CK6	2.95217e+08	2.08887e+08	1.75227e+08	4.18023e+07	3.70463e+07	44636000	PP_5174	Efflux membrane fusion protein, RND family
Q88CK5	1.57153e+08	108959000	69957000	47338000	9.58467e+06	4.60327e+07	PP_5175	HlyD family secretion protein
Q88CK3	7.75177e+07	2.05243e+08	105391000	3.10377e+07	7.07063e+07	20281000	PP_5177	Putrescine ABC transporter, permease protein
Q88CK1	9.79043e+08	1725400000	8.51047e+08	462320000	9.02633e+08	3.57867e+08	PP_5179	Polyamine-transporting ATPase
[truncated: 122 more rows]

## Sheet: fold changes
UNIPROT ID	wt_BDO	B10.1_BDO	B10.2_BDO	wt_GLU	B10.1_GLU	B10.2_GLU	Locus tag		average B10.1 and B10.2 on BDO	Deviation B10.1 and B10.2 on BDO	B10 vs wt on BDO	wt on BDO vs. wt on glucose	annotation
Q88P68	13448700000	14264000000	14845666667	13792666667	9476466667	11535666667	NA (deleted on May 11 2016)		1.45548e+10	0.0199819	1.08225	0.975062	Cold-shock domain family protein		cell highlight rules
P0A151	5.45377e+08	8.45943e+08	5.57623e+08	7.60753e+08	1043173333	6.87117e+08	PP_0001		7.01783e+08	0.20542	1.28679	0.71689	Probable chromosome-partitioning protein ParB	smaller than	0	900000
P0A149	42890000	1.15137e+08	2.94283e+07	1.42137e+08	1.93633e+08	78550000	PP_0002		7.22825e+07	0.592871	1.6853	0.301752	Uncharacterized protein PP_0002	between	1000000	1100000
P0A124	6.69893e+07	1.42483e+08	112167000	211330000	266400000	1.56847e+08	PP_0003		1.27325e+08	0.119051	1.90068	0.316989	Ribosomal RNA small subunit methyltransferase G	between	100000000	110000000
Q88RW8	340980000	6.35537e+08	6.04757e+08	910020000	1252500000	793720000	PP_0004		6.20147e+08	0.0248167	1.81872	0.374695	tRNA uridine 5-carboxymethylaminomethyl modification enzyme MnmG	between	1000000000	1100000000
P0A175	4.08337e+08	3.49777e+08	2.73837e+08	433640000	488220000	3.78913e+08	PP_0005		3.11807e+08	0.121774	0.763602	0.941649	tRNA modification GTPase MnmE	greater than	10000000000	11000000000
P0A140	3.93433e+08	466230000	653190000	1010680000	741820000	1021036667	PP_0006		5.5971e+08	0.167015	1.42263	0.389276	Membrane protein insertase YidC
P0A167	0	0	0	0	9618000	0	PP_0008		1e-05	0	#DIV/0!	#DIV/0!	Ribonuclease P protein component
P0A161	1.99563e+08	2.09373e+08	1.72197e+08	3.12067e+08	3.43163e+08	3.04007e+08	PP_0009		1.90785e+08	0.0974308	0.956012	0.639489	50S ribosomal protein L34
P0A116	4.72623e+08	412940000	399200000	6.26403e+08	6.39977e+08	6.31133e+08	PP_0010		4.0607e+08	0.0169183	0.859183	0.754503	Chromosomal replication initiator protein DnaA
P0A120	1927366667	1621133333	1806900000	1725333333	1846233333	1722100000	PP_0011		1.71402e+09	0.0541904	0.889305	1.1171	DNA polymerase III subunit beta
Q88RW6	1337633333	1140900000	1826766667	3083933333	1947066667	2777333333	PP_0013		1.48383e+09	0.231113	1.1093	0.433743	DNA gyrase subunit B
Q88RW2	1.50847e+08	8.49077e+07	1.00552e+08	1.65433e+07	7.39503e+07	4.74683e+07	PP_0017		9.273e+07	0.084356	0.61473	9.11828	Transcriptional regulator MvaT, P16 subunit, putative
Q88RW1	9.04943e+08	6.80523e+08	7.62593e+08	5.33967e+08	5.61257e+08	678810000	PP_0018		7.21558e+08	0.05687	0.797352	1.69476	Uncharacterized protein
Q88RW0	3.35333e+07	78244000	4.44233e+07	75850000	24394000	20554000	PP_0019		6.13337e+07	0.27571	1.82904	0.442101	Uncharacterized protein
Q88RV9	1.01629e+08	8.76543e+07	85301000	7.91393e+07	8.90133e+07	7.24473e+07	PP_0020		8.64777e+07	0.0136066	0.850912	1.28418	Uncharacterized protein
Q88RV6	4.47097e+07	1.51994e+08	8.09177e+07	5018200	6.37667e+06	14671000	PP_0023		1.16456e+08	0.305165	2.60472	8.9095	Uncharacterized protein
Q88RV0	1.19726e+08	5.58653e+07	84525000	63026000	5.28197e+07	46476000	PP_0029		7.01952e+07	0.204143	0.5863	1.89962	DNA-binding response regulator CzrR
Q88RU9	1.85627e+08	9.10097e+07	8.33317e+07	5.51297e+07	63389000	6.51537e+07	PP_0030		8.71707e+07	0.04404	0.469602	3.36709	Sensor histidine kinase
Q88RS8	0	0	8012000	0	0	0	PP_0051		4.006e+06	1	#DIV/0!	#DIV/0!	Sigma-54 dependent transcriptional regulator
Q88RS6	5445000	0	0	0	0	0	PP_0053		1e-05	0	1.83655e-12	#DIV/0!	Uncharacterized protein
Q88RS3	4072000000	1309733333	4.83437e+08	41195000	2.53097e+07	21929000	PP_0056		8.96585e+08	0.460802	0.220183	98.8469	Oxidoreductase, GMC family
Q88RS2	2141000000	1961733333	5.46437e+08	13139000	5.60597e+06	2032900	PP_0057		1.25408e+09	0.564275	0.585747	162.95	Major facilitator family transporter
Q88RS1	0	0	0	0	0	1.62743e+07	PP_0058		1e-05	0	#DIV/0!	#DIV/0!	1-acyl-sn-glycerol-3-phosphate acyltransferase, putative
Q88RS0	0	0	0	0	0	3.29033e+07	PP_0059		1e-05	0	#DIV/0!	#DIV/0!	D-glycero-beta-D-manno-heptose-1,7-bisphosphate 7-phosphatase
Q88RR9	1213133333	1140533333	1316000000	2079566667	1403900000	1608900000	PP_0060		1.22827e+09	0.0714286	1.01247	0.583359	Glycine--tRNA ligase beta subunit
Q88RR8	8.08047e+08	6.74703e+08	839950000	1429533333	1200833333	1269666667	PP_0061		7.57327e+08	0.109099	0.937231	0.565252	Glycine--tRNA ligase alpha subunit
Q88RR7	0	0	0	0	0	9852000	PP_0062		1e-05	0	#DIV/0!	#DIV/0!	DNA-3-methyladenine glycosidase I
Q88RR6	167410000	1.55973e+08	1.33077e+08	170270000	180510000	1.69457e+08	PP_0063		1.44525e+08	0.0792135	0.8633	0.983203	Lipid A biosynthesis lauroyl acyltransferase, putative
Q88RR5	1.39537e+07	0	0	0	0	0	PP_0064		1e-05	0	7.16658e-13	#DIV/0!	TPR domain protein
Q88RR4	311410000	2.49783e+08	2.14143e+08	268970000	363060000	2.86373e+08	PP_0065		2.31963e+08	0.0768225	0.744881	1.15779	Potassium uptake protein TrkA
Q88RR3	3.71983e+07	45286000	4.08873e+07	6.67127e+07	9.93727e+07	62256000	PP_0066		4.30867e+07	0.0510444	1.1583	0.55759	Ribosomal RNA small subunit methyltransferase B
Q88RR2	1.92277e+08	208490000	1.87887e+08	3.78267e+08	3.64517e+08	269270000	PP_0067		1.98188e+08	0.0519792	1.03075	0.50831	Methionyl-tRNA formyltransferase
Q88RR1	19579000	2.30433e+07	6.71527e+07	101723000	0	2.41083e+07	PP_0068		4.5098e+07	0.489039	2.30339	0.192474	Peptide deformylase 1
Q88RQ9	97806000	9.91377e+07	2.52223e+07	42660000	7.13607e+07	5.76213e+07	PP_0070		6.218e+07	0.594366	0.635748	2.29269	Threonylcarbamoyl-AMP synthase
Q88RQ7	1846466667	2490033333	1083730000	678360000	1508700000	6.93953e+08	PP_0072		1.78688e+09	0.393508	0.96773	2.72196	Quinone oxidoreductase
Q88RQ6	7.06657e+07	8.14337e+07	8.87083e+07	151240000	1.21223e+08	1.47603e+08	PP_0073		8.5071e+07	0.0427564	1.20385	0.467242	Oxygen-dependent coproporphyrinogen-III oxidase
Q88RQ5	222890000	1.52053e+08	1.85707e+08	1.38691e+08	239400000	210090000	PP_0074		1.6888e+08	0.0996368	0.757683	1.60709	Shikimate dehydrogenase (NADP(+))
Q88RP7	1681900000	1038800000	1440233333	3834333333	4054966667	3533466667	PP_0082		1.23952e+09	0.161931	0.736974	0.438642	Tryptophan synthase alpha chain
Q88RP6	2134833333	1492300000	2138800000	6277633333	6817533333	5693866667	PP_0083		1.81555e+09	0.178045	0.850441	0.34007	Tryptophan synthase beta chain
Q88RP4	1.56699e+08	46468000	6.49357e+08	5.76667e+07	4.81147e+07	6.15173e+07	PP_0085		3.47912e+08	0.866438	2.22026	2.71732	Uncharacterized protein
Q88RP2	568750000	1274866667	523270000	162340000	496570000	1.8436e+08	PP_0087		8.99068e+08	0.417986	1.58078	3.50345	Uncharacterized protein
Q88RP1	6.43157e+07	1.19742e+08	7.32177e+07	109779000	6.44117e+07	8.20063e+07	PP_0088		9.64797e+07	0.241108	1.5001	0.585865	Uncharacterized protein
Q88RP0	1.14152e+08	27535000	4.12993e+08	6.87133e+07	9.95687e+07	29488000	PP_0089		2.20264e+08	0.874991	1.92957	1.66127	Osmotically inducible protein OsmC
Q88RN5	0	0	0	0	4.85933e+06	0	PP_0094		1e-05	0	#DIV/0!	#DIV/0!	Hydrolase, haloacid dehalogenase-like family
Q88RN3	1597333333	1463233333	1710000000	1642100000	1568766667	1450033333	PP_0096		1.58662e+09	0.0777651	0.993291	0.972738	Oligopeptidase A
Q88RN2	0	0	0	0	0	1.81623e+07	PP_0097		1e-05	0	#DIV/0!	#DIV/0!	Uncharacterized protein
Q88RM9	3111800000	2481333333	3791233333	3312400000	1617800000	3226700000	PP_0100		3.13628e+09	0.20883	1.00787	0.93944	Carbonic anhydrase
Q88RM8	0	0	0	0	0	874500	PP_0101		1e-05	0	#DIV/0!	#DIV/0!	Sulfate transporter, putative
Q88RM6	5.66597e+08	5.45297e+07	1.68797e+08	3.93997e+07	4.10523e+07	5.69707e+07	PP_0103		1.11663e+08	0.511659	0.197077	14.3807	Cytochrome c oxidase subunit 2
Q88RM1	2.06247e+07	0	0	0	0	0	PP_0108		1e-05	0	4.84856e-13	#DIV/0!	Uncharacterized protein
Q88RL8	245050000	159390000	1.40803e+08	1.49827e+08	1.77973e+08	1.31637e+08	PP_0111		1.50097e+08	0.0619157	0.612514	1.63556	Sco1/SenC family protein
Q88RL7	1.82497e+08	2.09533e+08	2.33553e+08	1.98693e+08	1.83987e+08	1.32477e+08	PP_0112		2.21543e+08	0.0542106	1.21396	0.918484	ABC transporter, periplasmic binding protein, putative
Q88RL5	0	5.39467e+07	2.52677e+08	0	0	0	PP_0114		1.53312e+08	0.648124	#DIV/0!	#DIV/0!	Methionine import ATP-binding protein MetN 1
Q88RL4	0	0	0	0	255210000	1.83907e+08	PP_0115		1e-05	0	#DIV/0!	#DIV/0!	Catalase
Q88RL3	931840000	652030000	572840000	5.92257e+08	532030000	493980000	PP_0116		6.12435e+08	0.0646518	0.657232	1.57337	Lipoprotein, putative
Q88RK8	191870000	207730000	2.13023e+08	3.92747e+08	4.38637e+08	3.48147e+08	PP_0121		2.10377e+08	0.0125806	1.09645	0.488534	Homoserine kinase
Q88RK7	4.63407e+08	248040000	2.81737e+08	270040000	2.21097e+08	2.47783e+08	PP_0122		2.64888e+08	0.0636054	0.571611	1.71607	Uncharacterized protein
Q88RK6	4.52143e+08	445290000	3.59493e+08	4.64417e+08	4.77053e+08	4.47067e+08	PP_0123		4.02392e+08	0.106608	0.889965	0.973573	DNA polymerase I
Q88RK5	315880000	643590000	3.49047e+08	4.35317e+08	6.32177e+08	3.62713e+08	PP_0124		4.96318e+08	0.296728	1.57122	0.725633	Probable GTP-binding protein EngB
Q88RK3	0	0	23157000	31065000	0	0	PP_0126		1.15785e+07	1	#DIV/0!	0	Cytochrome c4
Q88RK2	5.25333e+08	4.52577e+08	664370000	445740000	472780000	5.94947e+08	PP_0127		5.58473e+08	0.189618	1.06308	1.17856	Thiol:disulfide interchange protein
Q88RJ7	0	0	0	7.78333e+06	0	0	PP_0132		1e-05	0	#DIV/0!	0	Sensory box histidine kinase
Q88RJ6	209540000	2.39983e+08	2.81993e+08	2.07257e+08	2.16327e+08	1.74183e+08	PP_0133		2.60988e+08	0.0804825	1.24553	1.01102	Alginate biosynthesis transcriptional regulatory protein AlgB
Q88RJ2	0	0	0	0	9911000	0	PP_0137		1e-05	0	#DIV/0!	#DIV/0!	Proton/sodium-glutamate/aspartate symporter
Q88RJ0	3.11013e+08	82720000	7.32933e+07	0	0	4.03333e+07	PP_0139		7.80067e+07	0.0604222	0.250815	#DIV/0!	Lipoprotein, putative
Q88RI9	3.28793e+07	0	0	0	0	0	PP_0140		1e-05	0	3.04142e-13	#DIV/0!	Uncharacterized protein
Q88RI8	6.54737e+07	41544000	37569000	3.88143e+07	22840000	3.20327e+07	PP_0141		3.95565e+07	0.0502446	0.604159	1.68684	ABC transporter, ATP-binding protein, putative
Q88RI4	0	0	0	0	4.65233e+06	0	PP_0145		1e-05	0	#DIV/0!	#DIV/0!	Na+/Pi cotransporter family protein
Q88RH5	1.26037e+07	2.72953e+07	2.90237e+07	247833000	90132000	3.81807e+08	PP_0154		2.81595e+07	0.0306883	2.23423	0.0508555	Acetyl-CoA hydrolase/transferase family protein
Q88RH4	1.45237e+07	42633000	1.39197e+07	5.18863e+07	48277000	0	PP_0155		2.82763e+07	0.507727	1.94691	0.279913	NAD(P) transhydrogenase subunit beta
Q88RH2	1.72777e+08	1.75977e+08	93060000	57063000	5.72057e+07	4.53693e+07	PP_0158		1.34518e+08	0.308198	0.778568	3.02782	Glutaryl-CoA dehydrogenase
Q88RH1	0	7356000	0	0	0	0	PP_0159		3.678e+06	1	#DIV/0!	#DIV/0!	CAIB/BAIF family protein
Q88RG7	0	0	0	0	1.41227e+07	0	PP_0163		1e-05	0	#DIV/0!	#DIV/0!	Transcriptional regulator, GntR family
Q88RG5	1.79983e+08	1.50127e+08	9.35843e+07	1.28607e+08	104336000	1.0331e+08	PP_0165		1.21856e+08	0.232006	0.677038	1.39949	GGDEF domain protein
Q88RG4	4.16943e+08	5.77453e+08	4.00313e+08	5.04657e+08	819510000	3.85487e+08	PP_0166		4.88883e+08	0.181168	1.17254	0.826192	HlyD family secretion protein
Q88RG3	337900000	4.13253e+08	2.70797e+08	3.98217e+08	554990000	2.58723e+08	PP_0167		3.42025e+08	0.208255	1.01221	0.848533	Toxin secretion ATP-binding protein
Q88RG2	3453400000	7082700000	2195466667	2696700000	5552366667	1683100000	PP_0168		4.63908e+09	0.526746	1.34334	1.2806	Surface adhesion protein, putative
Q88RF7	1.67473e+08	1.69237e+08	1.27337e+08	1.87963e+08	128390000	1.87367e+08	PP_0173		1.48287e+08	0.14128	0.885434	0.890989	Transcriptional factor-related protein
Q88RE9	4.20787e+08	3.63013e+08	438200000	2.52943e+08	1.95643e+08	2.53103e+08	PP_0181		4.00607e+08	0.093841	0.952042	1.66356	Uncharacterized protein
Q88RE7	4.60853e+08	6.69843e+08	263490000	2.73673e+08	2.98193e+08	1.96547e+08	PP_0183		4.66667e+08	0.435379	1.01261	1.68395	Glutathione S-transferase family protein
P59618	1909000000	2018600000	1848200000	2842466667	2581833333	2664700000	PP_0184		1.9334e+09	0.0440674	1.01278	0.6716	Argininosuccinate lyase
Q88RE6	1103096667	6.76437e+08	888940000	3.28163e+08	2.79663e+08	3.39363e+08	PP_0185		7.82688e+08	0.135752	0.709537	3.36143	Alginate biosynthesis protein PprA
Q88RE5	9.30497e+07	1.27753e+08	114090000	1.27063e+08	1.28867e+08	1.23293e+08	PP_0186		1.20922e+08	0.0564966	1.29954	0.732309	Porphobilinogen deaminase
Q88RE4	0	0	0	0	3570000	0	PP_0187		1e-05	0	#DIV/0!	#DIV/0!	Uroporphyrinogen-III synthetase
Q88RE3	8.68317e+08	1022733333	7.51443e+08	7.99227e+08	7.07257e+08	5.91247e+08	PP_0188		8.87088e+08	0.15291	1.02162	1.08645	Uroporphyrin-III C-methyltransferase, putative
Q88RE2	6.36737e+08	807390000	5.62577e+08	5.26453e+08	5.21843e+08	410810000	PP_0189		6.84983e+08	0.1787	1.07577	1.20948	HemY protein
Q88RE1	8.92303e+07	5.92617e+07	63213000	3.26617e+07	24973000	2.22807e+07	PP_0191		6.12373e+07	0.0322625	0.686284	2.73196	Transcriptional regulator PfrA
Q88RE0	0	0	5.35533e+06	0	0	0	PP_0192		2.67767e+06	1	#DIV/0!	#DIV/0!	Peptidyl-prolyl cis-trans isomerase
Q88RD8	2287866667	1343193333	2662856667	166870000	581630000	7.56177e+08	PP_0194		2.00303e+09	0.329418	0.875499	13.7105	Alginate regulatory protein AlgP
Q88RD6	6.09133e+07	6.14863e+07	5.93807e+07	1.25077e+08	1.11167e+08	9.70987e+07	PP_0196		6.04335e+07	0.0174214	0.992123	0.487008	ABC transporter, ATP-binding protein, putative
Q88RD0	9.04077e+08	4.11233e+08	4.81277e+08	2.17103e+08	2.35073e+08	2.90283e+08	PP_0202		4.46255e+08	0.078479	0.493603	4.16427	CBS domain protein
Q88RC9	1.97133e+08	3.56177e+08	3.41493e+08	1.81807e+08	32381000	279510000	PP_0203		3.48835e+08	0.0210462	1.76954	1.0843	Tabtoxinine-beta-lactam limiting dipeptidase, putative
Q88RC0	8656166667	8942066667	8912000000	2988666667	3679833333	3400200000	PP_0213		8.92703e+09	0.00168402	1.03129	2.89633	Glutarate-semialdehyde dehydrogenase DavD
Q88RB9	29700000000	18218333333	26017000000	4229033333	5988266667	4772333333	PP_0214		2.21177e+10	0.176299	0.744703	7.02288	5-aminovalerate aminotransferase DavT
Q88RB8	87339000	3.97703e+07	3.98887e+07	3.94517e+07	2.01567e+07	35818000	PP_0215		3.98295e+07	0.0014855	0.456033	2.21382	Response regulator
Q88RB7	0	0	0	0	0	2.53917e+06	PP_0216		1e-05	0	#DIV/0!	#DIV/0!	Sensory box protein
Q88RA8	7.78443e+07	1.53913e+08	9.69367e+07	82316000	1.04274e+08	8.35967e+07	PP_0225		1.25425e+08	0.227134	1.61123	0.945677	Cysteine ABC transporter, ATP-binding protein, putative
Q88RA6	2629233333	4151866667	2397800000	1412500000	2067633333	1530066667	PP_0227		3.27483e+09	0.26781	1.24555	1.8614	Cysteine ABC transporter, periplasmic cysteine-binding protein, putative
Q88RA5	6.58017e+07	8.65923e+07	60879000	61547000	80489000	6.18283e+07	PP_0228		7.37357e+07	0.174362	1.12057	1.06913	Serine acetyltransferase
Q88R98	866990000	6.55223e+08	6.67447e+08	3.37313e+08	1.72503e+08	2.92743e+08	PP_0235		6.61335e+08	0.00924141	0.762794	2.57028	Antioxidant protein LsfA
Q88R94	1.15405e+08	4.46667e+07	8.90567e+07	0	5.02333e+07	0	PP_0239		6.68617e+07	0.331954	0.579364	#DIV/0!	Sulfonate ABC transporter, permease protein SsuC
Q88R91	0	0	0	0	0	1.03983e+07	PP_0242		1e-05	0	#DIV/0!	#DIV/0!	Transcriptional regulator, TetR family
Q88R90	1.25337e+08	2.21287e+08	2.21607e+08	281230000	2.22063e+08	2.51927e+08	PP_0243		2.21447e+08	0.000722522	1.76681	0.445673	Glutamate--cysteine ligase
Q88R88	3.89833e+08	642710000	7.24287e+08	1076023333	1337900000	1017596667	PP_0245		6.83498e+08	0.0596758	1.75331	0.362291	S1 RNA binding domain protein
Q88R87	897490000	9.01013e+08	6.30303e+08	284380000	4.41527e+08	366000000	PP_0246		7.65658e+08	0.176783	0.853111	3.15595	DNA-binding response regulator OmpR
Q88R86	4.64613e+07	6.31977e+07	2.05663e+07	1.58387e+07	3.22337e+07	2.57517e+07	PP_0247		4.1882e+07	0.508946	0.901438	2.93341	Osmolarity sensor protein EnvZ
Q88R85	5.78927e+07	1.18739e+08	43353000	16845000	1.12077e+07	1.16387e+07	PP_0248		8.10462e+07	0.465083	1.39994	3.43679	Probable alpha-L-glutamate ligase
Q88R83	2.80097e+07	3.56993e+07	31888000	1.34157e+07	32569000	2.27313e+07	PP_0250		3.37937e+07	0.0563912	1.2065	2.08783	Heat shock protein 15
Q88R81	8.84577e+08	985260000	1011930000	1187690000	1535366667	1237133333	PP_0252		9.98595e+08	0.0133538	1.1289	0.744788	33 kDa chaperonin
Q88R76	2362000000	1542033333	1727266667	8.69353e+08	4.69423e+08	7.11477e+08	PP_0258		1.63465e+09	0.0566584	0.692062	2.71696	LysM domain protein
Q88R74	108223000	1.42483e+08	8.92567e+07	1.23632e+08	1.22213e+08	1.33433e+08	PP_0260		1.1587e+08	0.229683	1.07066	0.875362	ADP compound hydrolase
Q88R73	0	0	0	2.26537e+07	0	0	PP_0261		1e-05	0	#DIV/0!	0	3'(2'),5'-bisphosphate nucleotidase
Q88R72	0	0	0	0	0	17864000	PP_0262		1e-05	0	#DIV/0!	#DIV/0!	Uncharacterized protein
Q88R71	6.85077e+07	2.64717e+07	2.39823e+07	39450000	0	1.26797e+07	PP_0263		2.5227e+07	0.0493387	0.368236	1.73657	Sigma-54 dependent response regulator
Q88R69	13367000	0	0	0	0	0	PP_0265		1e-05	0	7.48111e-13	#DIV/0!	dTDP-4-dehydrorhamnose 3,5-epimerase family protein
Q88R68	2.79837e+08	2.52173e+08	308960000	68830000	98632000	9.37433e+07	PP_0266		2.80567e+08	0.1012	1.00261	4.06562	Agmatine deiminase
Q88R66	0	16991000	0	4.58143e+07	83546000	4.02133e+07	PP_0268		8.4955e+06	1	#DIV/0!	0	Outer membrane protein OprE3
Q88R52	3726033333	5751966667	2697800000	2841566667	4487300000	2440366667	PP_0282		4.22488e+09	0.36145	1.13388	1.31126	Amino acid ABC transporter, periplasmic amino acid-binding protein
Q88R51	3.44767e+08	734410000	2.53783e+08	3.69053e+08	881600000	3.36193e+08	PP_0283		4.94097e+08	0.486369	1.43313	0.934192	Amino acid ABC transporter, ATP-binding protein
Q88R49	246710000	8.65747e+08	3.79777e+08	5.36583e+08	773630000	5.09997e+08	PP_0285		6.22762e+08	0.390173	2.52427	0.459779	Probable Fe(2+)-trafficking protein
Q88R48	0	0	0	0	5.58233e+06	0	PP_0286		1e-05	0	#DIV/0!	#DIV/0!	A/G specific adenine glycosylase
Q88R47	3.68853e+08	503870000	3.93787e+08	615410000	526500000	570750000	PP_0287		4.48828e+08	0.122634	1.21682	0.599362	Uncharacterized protein
Q88R46	5.84757e+08	1613266667	4.76493e+08	589610000	6.07297e+08	4.23653e+08	PP_0288		1.04488e+09	0.543973	1.78686	0.991769	Oxalate/formate antiporter, putative
Q88R45	5.87453e+07	18800000	0	9568000	0	2.98153e+07	PP_0289		9.4e+06	1	0.160013	6.13977	Imidazoleglycerol-phosphate dehydratase
Q88R44	3.06233e+08	3.10653e+08	2.70257e+08	3.14387e+08	315060000	3.00697e+08	PP_0290		2.90455e+08	0.0695403	0.948476	0.974066	Imidazole glycerol phosphate synthase subunit HisH
Q88R42	1322233333	2183466667	1795833333	3742366667	3343466667	3237600000	PP_0292		1.98965e+09	0.0974124	1.50476	0.353315	1-(5-phosphoribosyl)-5-[(5-phosphoribosylamino)methylideneamino] imidazole-4-carboxamide isomerase
Q88R41	2.11553e+08	311980000	3.10157e+08	5.07167e+08	3.93047e+08	449260000	PP_0293		3.11068e+08	0.00293076	1.4704	0.417128	Imidazole glycerol phosphate synthase subunit HisF
Q88R40	325040000	527480000	1.37217e+08	53228000	47734000	5.15747e+07	PP_0294		3.32348e+08	0.58713	1.02248	6.10656	Glycine betaine/L-proline ABC transporter, ATP-binding subunit
Q88R38	1449833333	1576366667	8.60223e+08	3.53913e+08	301970000	3.67177e+08	PP_0296		1.2183e+09	0.293912	0.8403	4.09658	Glycine betaine/L-proline ABC transporter, periplasmic binding protein
Q88R35	344060000	321690000	2.11273e+08	2.05987e+08	1.63647e+08	2.10257e+08	PP_0299		2.66482e+08	0.207175	0.774521	1.6703	Uncharacterized protein
Q88R27	5.24177e+07	6.56447e+07	58379000	74626000	6.59817e+07	59905000	PP_0307		6.20118e+07	0.0585829	1.18303	0.702405	Uncharacterized protein
Q88R26	418810000	7.21737e+07	4.53947e+07	41262000	3.35577e+07	34777000	PP_0308		5.87842e+07	0.227774	0.14036	10.15	Dipeptidase, putative
Q88R22	1.13977e+08	1.58762e+08	1.53683e+08	166190000	1.19977e+08	2.33487e+08	PP_0312		1.56223e+08	0.0162535	1.37065	0.685821	Electron transfer flavoprotein, alpha subunit
Q88R18	0	0	6.07467e+06	0	0	0	PP_0316		3.03733e+06	1	#DIV/0!	#DIV/0!	Oxidoreductase, FAD-binding, putative
Q88R17	0	0	0	4.04667e+06	0	0	PP_0317		1e-05	0	#DIV/0!	0	Methyl-accepting chemotaxis transducer
Q88R16	0	0	71971000	1.16373e+08	1.61043e+08	2.25403e+08	PP_0318		3.59855e+07	1	#DIV/0!	0	Uncharacterized protein
Q88R15	0	0	0	6.95967e+06	0	0	PP_0319		1e-05	0	#DIV/0!	0	Cell division protein ZapA
Q88R13	135810000	1.87877e+08	1.90203e+08	210270000	1.40207e+08	0	PP_0321		1.8904e+08	0.0061539	1.39194	0.645884	L-threonine aldolase
Q88R12	1.79133e+08	85963000	5.36737e+07	6.75273e+07	76782000	6.72387e+07	PP_0322		6.98183e+07	0.231238	0.389756	2.65275	Serine hydroxymethyltransferase 1
Q88R11	6.85307e+07	3.54343e+07	24615000	2.52963e+07	25738000	25353000	PP_0323		3.00247e+07	0.180174	0.43812	2.70911	Sarcosine oxidase, beta subunit
Q88R10	0	0	0	0	0	17065000	PP_0324		1e-05	0	#DIV/0!	#DIV/0!	Sarcosine oxidase, delta subunit
Q88R09	9.06657e+07	9.65467e+07	6.96083e+07	234190000	2.50843e+08	151400000	PP_0325		8.30775e+07	0.162128	0.916306	0.387146	Sarcosine oxidase, alpha subunit
Q88R07	0	2.61187e+07	0	0	0	0	PP_0327		1.30593e+07	1	#DIV/0!	#DIV/0!	Formyltetrahydrofolate deformylase
Q88R06	5.22593e+08	2.82447e+08	1.49543e+08	8.95867e+07	4.43003e+07	139750000	PP_0328		2.15995e+08	0.307654	0.413314	5.83338	Isocitrate dehydrogenase, NADP-dependent, monomeric-type
Q88R04	0	0	0	0	0	15567000	PP_0330		1e-05	0	#DIV/0!	#DIV/0!	Uncharacterized protein
Q88R01	128396000	2.24717e+08	2.61597e+08	1.04055e+08	67027000	1.25377e+08	PP_0333		2.43157e+08	0.0758359	1.8938	1.23392	Uncharacterized protein
Q88QZ9	2.59547e+08	374340000	2.72237e+08	3.99353e+08	2.58847e+08	2.78403e+08	PP_0335		3.23288e+08	0.157914	1.24559	0.649917	Glutathione S-transferase family protein
Q88QZ8	706740000	8.45547e+08	729120000	8.92803e+08	5.42943e+08	816950000	PP_0336		7.87333e+08	0.0739373	1.11404	0.791597	Peptide methionine sulfoxide reductase MsrA
Q88QZ6	8.68443e+08	1095900000	1112250000	3075933333	2035933333	2538033333	PP_0338		1.10408e+09	0.00740439	1.27133	0.282335	Acetyltransferase component of pyruvate dehydrogenase complex
Q88QZ5	6914400000	6517133333	7175233333	17876333333	14629666667	16502000000	PP_0339		6.84618e+09	0.0480633	0.990134	0.386791	Pyruvate dehydrogenase E1 component
Q88QZ4	4.79967e+08	5.86687e+08	2.95917e+08	3.37317e+08	562930000	2.92087e+08	PP_0340		4.41302e+08	0.329446	0.919442	1.4229	Glutamate-ammonia-ligase adenylyltransferase
Q88QZ3	5.29773e+07	57790000	5.27883e+07	8.70217e+07	78512000	3.64843e+07	PP_0341		5.52892e+07	0.0452319	1.04364	0.608783	Heptosyltransferase II
Q88QY8	98079000	1.06557e+08	9.74773e+07	109099000	95841000	1.10225e+08	PP_0346		1.02017e+08	0.0444991	1.04015	0.898991	Heptose kinase WapQ, putative
Q88QY7	6.40607e+07	99331000	5.24977e+07	89966000	9.34333e+07	5.10773e+07	PP_0347		7.59143e+07	0.308462	1.18504	0.712054	Uncharacterized protein
Q88QY0	0	0	0	0	0	2997000	PP_0354		1e-05	0	#DIV/0!	#DIV/0!	CBS domain protein
Q88QX9	0	0	1.22793e+07	0	0	0	PP_0355		6.13967e+06	1	#DIV/0!	#DIV/0!	Response regulator
Q88QX8	16065333333	7769700000	11051333333	2729433333	3725000000	2622833333	PP_0356		9.41052e+09	0.17436	0.585765	5.88596	Malate synthase G
Q88QX7	3.16213e+08	6.38137e+07	9.54127e+07	2.37427e+07	0	2.84523e+07	PP_0357		7.96132e+07	0.198453	0.25177	13.3184	ACT domain protein
Q88QX5	0	0	0	1031000	0	0	PP_0359		1e-05	0	#DIV/0!	0	Stress response kinase A
Q88QX4	0	4.31767e+06	0	0	0	0	PP_0360		2.15883e+06	1	#DIV/0!	#DIV/0!	Molybdate transport regulator
Q88QX2	1.31211e+08	4.32233e+08	3.02473e+08	1507600000	1651000000	1199706667	PP_0362		3.67353e+08	0.176615	2.79972	0.0870328	Biotin synthase
Q88QX1	0	0	0	0	0	14692000	PP_0363		1e-05	0	#DIV/0!	#DIV/0!	8-amino-7-oxononanoate synthase
Q88QX0	50988000	0	0	1.26993e+07	0	0	PP_0364		1e-05	0	1.96125e-13	4.01501	Biotin biosynthesis protein BioH
Q88QW8	5.52513e+08	4.51353e+08	3.00987e+08	251540000	1.83823e+08	199220000	PP_0366		3.7617e+08	0.199865	0.680834	2.19652	ATP-dependent dethiobiotin synthetase BioD
Q88QW6	1521066667	1611466667	1786033333	1561533333	9.83937e+08	1410433333	PP_0368		1.69875e+09	0.0513809	1.11681	0.974085	Acyl-CoA dehydrogenase, putative
Q88QW4	6.30153e+07	1.89107e+07	1.75373e+07	0	0	0	PP_0370		1.8224e+07	0.0376793	0.289199	#DIV/0!	Acyl-CoA dehydrogenase family protein
Q88QV9	5.85763e+08	6.58907e+08	4.05373e+08	673070000	5.35493e+08	5.62413e+08	PP_0375		5.3214e+08	0.238221	0.908456	0.870286	Prolyl oligopeptidase family protein
Q88QV8	379800000	371180000	2.56213e+08	3.61017e+08	2.98033e+08	2.96817e+08	PP_0376		3.13697e+08	0.183245	0.825952	1.05203	Coenzyme PQQ synthesis protein E
Q88QV7	1052280000	1170400000	8.99663e+08	9.56587e+08	980230000	9.08377e+08	PP_0377		1.03503e+09	0.130787	0.983609	1.10004	Coenzyme PQQ synthesis protein D 1
Q88QV6	3783200000	3391600000	2603133333	3071300000	2121733333	2315466667	PP_0378		2.99737e+09	0.131527	0.792283	1.23179	Pyrroloquinoline-quinone synthase
Q88QV5	1200700000	9.70997e+08	7.14783e+08	9.51187e+08	7.77087e+08	8.36523e+08	PP_0379		8.4289e+08	0.151985	0.701999	1.26232	Coenzyme PQQ synthesis protein B
Q88QV2	1.74213e+08	6.77207e+07	83476000	3.37263e+07	3.27033e+07	44476000	PP_0382		7.55983e+07	0.104204	0.433941	5.1655	Carbon-nitrogen hydrolase family protein
Q88QV1	2.44993e+07	0	0	0	0	0	PP_0383		1e-05	0	4.08174e-13	#DIV/0!	Tryptophan 2-monooxygenase, putative
Q88QU8	1.27233e+08	2.17713e+07	2.38337e+07	1.83183e+07	15850000	19933000	PP_0386		2.28025e+07	0.0452216	0.179218	6.94568	Sensory box protein
Q88QU7	2805033333	2509633333	2707266667	3594300000	3142033333	3725133333	PP_0387		2.60845e+09	0.0378833	0.929918	0.780412	RNA polymerase sigma factor RpoD
P0A165	5940633333	8689800000	9077166667	10315400000	10751933333	12934666667	PP_0389		8.88348e+09	0.0218026	1.49538	0.575899	30S ribosomal protein S21
Q88QU5	0	0	0	0	0	1787400	PP_0391		1e-05	0	#DIV/0!	#DIV/0!	Glycerol-3-phosphate acyltransferase
Q88QU2	13643000	0	0	0	0	0	PP_0394		1e-05	0	7.32977e-13	#DIV/0!	Multifunctional CCA protein
Q88QU1	6.91587e+07	1.09915e+08	7.00903e+07	33910000	25829000	12420000	PP_0395		9.00028e+07	0.221243	1.3014	2.03948	Uncharacterized protein
P59351	5.11587e+08	3.17427e+08	3.23407e+08	1.33243e+08	1.21043e+08	1.13853e+08	PP_0396		3.20417e+08	0.0093316	0.626319	3.83949	UPF0229 protein PP_0396
Q88QU0	6892266667	4400466667	4237800000	2184700000	2173333333	1956233333	PP_0397		4.31913e+09	0.0188309	0.626664	3.15479	Uncharacterized protein
Q88QT9	2.06273e+07	31009000	0	1.19643e+08	0	89530000	PP_0398		1.55045e+07	1	0.751648	0.172407	Thiosulfate sulfurtransferase GlpE
Q88QT7	0	1.73857e+07	0	0	0	0	PP_0400		8.69283e+06	1	#DIV/0!	#DIV/0!	Protein ApaG
Q88QT6	1.21487e+08	7.78397e+07	8.17787e+07	1.38684e+08	102058000	1.99703e+08	PP_0401		7.98092e+07	0.0246776	0.656938	0.875998	Ribosomal RNA small subunit methyltransferase A
Q88QT5	1.59097e+08	1.72267e+08	2.03857e+08	2.20247e+08	1.76193e+08	2.04257e+08	PP_0402		1.88062e+08	0.0839884	1.18206	0.722357	4-hydroxythreonine-4-phosphate dehydrogenase
Q88QT4	2125033333	1575033333	2122966667	3063000000	1970133333	2659433333	PP_0403		1.849e+09	0.14817	0.870104	0.693775	Chaperone SurA
Q88QT3	2.60017e+08	3.44467e+08	2.16187e+08	3.65283e+08	457900000	2.86213e+08	PP_0405		2.80327e+08	0.228804	1.07811	0.711822	Uncharacterized protein
Q88QT2	0	1.33913e+07	0	0	0	0	PP_0406		6.69567e+06	1	#DIV/0!	#DIV/0!	Nucleotidyltransferase family protein
Q88QT0	95644000	420150000	8.72707e+07	6.58613e+07	4.22733e+07	26304000	PP_0408		2.5371e+08	0.656022	2.65265	1.4522	Uncharacterized protein
Q88QS8	6.08303e+07	7.99597e+07	3.57693e+07	22388000	5.18063e+07	11345000	PP_0410		5.78645e+07	0.381843	0.951244	2.7171	DNA-binding response regulator UhpA
Q88QS7	5373033333	555360000	4.24523e+08	116720000	1.56977e+08	1.23097e+08	PP_0411		4.89942e+08	0.133523	0.0911853	46.0335	ABC transporter, ATP-binding protein
Q88QS6	11282066667	1007923333	1117233333	3.26887e+08	2.67107e+08	2.61973e+08	PP_0412		1.06258e+09	0.0514362	0.094183	34.5137	Polyamine ABC transporter, periplasmic polyamine-binding protein
Q88QS5	1471500000	1.76653e+07	20176000	25303300	6519800	1.28401e+07	PP_0413		1.89207e+07	0.0663472	0.0128581	58.1545	Polyamine ABC transporter, permease protein
Q88QS4	68380000	0	0	0	0	0	PP_0414		1e-05	0	1.46242e-13	#DIV/0!	Polyamine ABC transporter, permease protein
Q88QS3	126970000	7.99197e+07	4.95317e+07	1.71747e+08	117492000	1.79833e+08	PP_0415		6.47257e+07	0.234745	0.509771	0.739287	Ribulose-phosphate 3-epimerase
Q88QS2	0	0	0	0	0	14441000	PP_0416		1e-05	0	#DIV/0!	#DIV/0!	Phosphoglycolate phosphatase
Q88QS1	1659066667	1954766667	1868700000	2002466667	1986400000	1765233333	PP_0417		1.91173e+09	0.0225101	1.15229	0.828512	Anthranilate synthase, component I
Q88QR8	61023000	28735000	40558000	9.45047e+07	6.48833e+07	7.88897e+07	PP_0420		3.46465e+07	0.170623	0.567761	0.645714	Anthranilate synthase, component II
Q88QR7	5.68123e+08	527260000	4.82777e+08	319790000	2.83283e+08	404130000	PP_0421		5.05018e+08	0.0440413	0.888924	1.77655	Anthranilate phosphoribosyltransferase
Q88QR6	9.18707e+08	926400000	7.86173e+08	9.05353e+08	6.48647e+08	864440000	PP_0422		8.56287e+08	0.0818807	0.932057	1.01475	Indole-3-glycerol phosphate synthase
Q88QR5	0	0	0	0	0	11162000	PP_0423		1e-05	0	#DIV/0!	#DIV/0!	Uncharacterized protein
Q88QR4	0	0	1.96377e+08	1.66647e+08	0	1.79037e+08	PP_0424		9.81883e+07	1	#DIV/0!	0	Catabolite gene activator Crp
Q88QR3	1.20986e+08	111015000	7.10673e+07	7.42247e+07	9.08127e+07	4.57553e+07	PP_0425		9.10412e+07	0.219393	0.752491	1.63	Uncharacterized protein
Q88QR1	0	0	0	0	2.40323e+07	0	PP_0427		1e-05	0	#DIV/0!	#DIV/0!	2-nonaprenyl-3-methyl-6-methoxy-1,4-benzoquinol hydroxylase
Q88QR0	1575533333	2153366667	1805900000	1476333333	1467666667	1517833333	PP_0428		1.97963e+09	0.0877604	1.25648	1.06719	HIT family protein
Q88QQ8	1.62723e+08	1.92547e+08	98495000	73575000	80406000	4.58877e+07	PP_0430		1.45521e+08	0.323155	0.894284	2.21167	Uncharacterized protein
Q88QQ5	231120000	3.20957e+08	282780000	4.23233e+08	5.12663e+08	3.90843e+08	PP_0433		3.01868e+08	0.063234	1.30611	0.546082	Iron-sulfur cluster insertion protein ErpA
Q88QQ4	0	0	3.14857e+06	0	0	0	PP_0434		1.57428e+06	1	#DIV/0!	#DIV/0!	Anhydro-N-acetylmuramic acid kinase
Q88QQ3	0	2.30403e+07	36640000	7.97937e+07	39503000	4.47247e+07	PP_0435		2.98402e+07	0.227875	#DIV/0!	0	Peptidase, M23/M37 family
Q88QQ2	1251633333	3474100000	1829833333	3327400000	5884200000	3046533333	PP_0436		2.65197e+09	0.310009	2.1188	0.37616	Tyrosine--tRNA ligase
Q88QP8	1914233333	2300300000	2522666667	3265033333	2547300000	2956633333	PP_0440		2.41148e+09	0.0461058	1.25976	0.586283	Elongation factor Tu-A
Q88QP6	9.76397e+08	1349300000	1464666667	1667533333	1895466667	1806766667	PP_0442		1.40698e+09	0.0409979	1.441	0.585534	Transcription termination/antitermination protein NusG
Q88QP5	7569466667	11031000000	12504333333	19703333333	23292666667	19709666667	PP_0443		1.17677e+10	0.0626009	1.55462	0.384172	50S ribosomal protein L11
Q88QP4	10276900000	16445333333	17971666667	28750333333	30377666667	32112333333	PP_0444		1.72085e+10	0.0443482	1.67448	0.357453	50S ribosomal protein L1
Q88QP3	9071966667	11846333333	14805333333	20677666667	20683666667	21756333333	PP_0445		1.33258e+10	0.111025	1.4689	0.438733	50S ribosomal protein L10
P0A157	19055333333	27509333333	29498666667	40771333333	47999333333	42981666667	PP_0446		2.8504e+10	0.0348957	1.49585	0.467371	50S ribosomal protein L7/L12
Q88QP2	19919000000	22441666667	24342000000	30003333333	27718333333	28052666667	PP_0447		2.33918e+10	0.0406196	1.17435	0.663893	DNA-directed RNA polymerase subunit beta
Q88QP1	18241000000	19319000000	21485000000	23690333333	25151000000	23995666667	PP_0448		2.0402e+10	0.053083	1.11847	0.769977	DNA-directed RNA polymerase subunit beta'
Q88QP0	5311633333	7769100000	8769100000	15320000000	16852333333	14455333333	PP_0449		8.2691e+09	0.0604661	1.55679	0.346712	30S ribosomal protein S12
Q88QN9	12751333333	16496000000	17693666667	32217000000	31980333333	30561000000	PP_0450		1.70948e+10	0.0350301	1.34063	0.395795	30S ribosomal protein S7
Q88QN8	21107666667	34541333333	38579333333	69867000000	63320333333	56441333333	PP_0451		3.65603e+10	0.0552238	1.73209	0.302112	Elongation factor G 1
Q88QN7	57242000000	67902000000	78947666667	89734666667	109333000000	88410333333	PP_0452		7.34248e+10	0.0752175	1.28271	0.637903	Elongation factor Tu-B
Q88QN6	7976400000	11720666667	12892333333	21493000000	20622000000	19909000000	PP_0453		1.23065e+10	0.0476036	1.54286	0.371116	30S ribosomal protein S10
Q88QN5	12532333333	17280000000	19831333333	32956333333	35860333333	32130333333	PP_0454		1.85557e+10	0.0687481	1.48062	0.380271	50S ribosomal protein L3
Q88QN4	5772100000	6941366667	8666766667	10655000000	12824666667	11837666667	PP_0455		7.80407e+09	0.110545	1.35203	0.541727	50S ribosomal protein L4
Q88QN3	6253333333	7994366667	9399700000	14045000000	14711333333	13767000000	PP_0456		8.69703e+09	0.0807938	1.39078	0.445236	50S ribosomal protein L23
Q88QN2	19941666667	25038666667	30645333333	33195333333	46229000000	44174000000	PP_0457		2.7842e+10	0.100687	1.39617	0.600737	50S ribosomal protein L2
Q88QN1	3500233333	3189766667	4307900000	3898866667	6248366667	5576000000	PP_0458		3.74883e+09	0.149131	1.07102	0.897757	30S ribosomal protein S19
Q88QN0	5382866667	6896066667	9269100000	7369533333	12936666667	12266333333	PP_0459		8.08258e+09	0.146799	1.50154	0.730422	50S ribosomal protein L22
Q88QM9	6885400000	8181466667	9783566667	10588033333	14457333333	13245333333	PP_0460		8.98252e+09	0.0891788	1.30457	0.6503	Prolyl oligopeptidase family protein
Q88QM8	7150800000	10433400000	10443166667	20714666667	21067333333	19027000000	PP_0461		1.04383e+10	0.000467829	1.45974	0.345205	50S ribosomal protein L16
Q88QM7	8004600000	10263666667	11917700000	17507000000	21650666667	16401333333	PP_0462		1.10907e+10	0.0745686	1.38554	0.457223	50S ribosomal protein L29
Q88QM6	7.66983e+08	580480000	915720000	4.44303e+08	1094850000	817970000	PP_0463		7.481e+08	0.224061	0.97538	1.72626	30S ribosomal protein S17
Q88QM5	3105833333	4336900000	5073233333	8692633333	8880566667	7689566667	PP_0464		4.70507e+09	0.078249	1.51491	0.357295	50S ribosomal protein L14
Q88QM4	3084266667	3808400000	4433600000	5560633333	7130900000	6325233333	PP_0465		4.121e+09	0.0758554	1.33614	0.554661	50S ribosomal protein L24
Q88QM3	15644333333	20378333333	22911666667	37949333333	39373666667	31267333333	PP_0466		2.1645e+10	0.0585201	1.38357	0.412243	50S ribosomal protein L5
Q88QM2	3320000000	3088300000	4550066667	5546833333	6305266667	5300400000	PP_0467		3.81918e+09	0.191372	1.15036	0.59854	30S ribosomal protein S14
Q88QM1	8304866667	9892300000	12040000000	13147666667	15225666667	15316666667	PP_0468		1.09662e+10	0.0979241	1.32045	0.631661	30S ribosomal protein S8
Q88QM0	7573266667	10018966667	10761000000	19770333333	16309000000	15331666667	PP_0469		1.039e+10	0.0357091	1.37193	0.383062	50S ribosomal protein L6
Q88QL9	6857533333	9247933333	11059666667	18804000000	15665666667	15066000000	PP_0470		1.01538e+10	0.0892145	1.48068	0.364685	50S ribosomal protein L18
Q88QL8	8224800000	10789333333	11305333333	20821000000	20920000000	19008333333	PP_0471		1.10473e+10	0.0233541	1.34317	0.395024	30S ribosomal protein S5
Q88QL7	4863166667	4837633333	6280100000	7377200000	8335700000	7511533333	PP_0472		5.55887e+09	0.129745	1.14305	0.659216	50S ribosomal protein L30
Q88QL6	12377666667	19862000000	20410333333	34457666667	36095666667	31795000000	PP_0473		2.01362e+10	0.0136156	1.62681	0.359214	50S ribosomal protein L15
Q88QL5	9.31627e+08	1271390000	1097120000	1847800000	1254120000	1468366667	PP_0474		1.18426e+09	0.0735779	1.27117	0.504182	Protein translocase subunit SecY
P61113	0	0	0	0	0	1.49903e+07	PP_0475		1e-05	0	#DIV/0!	#DIV/0!	50S ribosomal protein L36
Q88QL3	6130800000	8241866667	10109000000	15103666667	11776000000	13278000000	PP_0476		9.17543e+09	0.101746	1.49661	0.405915	30S ribosomal protein S13
P59374	5963933333	8670700000	9430333333	17282666667	16094333333	13908666667	PP_0477		9.05052e+09	0.0419663	1.51754	0.345082	30S ribosomal protein S11
Q88QL2	12799666667	17408000000	21338000000	28858666667	30549333333	28856000000	PP_0478		1.9373e+10	0.10143	1.51356	0.443529	30S ribosomal protein S4
Q88QL1	7664366667	6762833333	7452400000	9088766667	8706400000	7585366667	PP_0479		7.10762e+09	0.048509	0.927359	0.843279	DNA-directed RNA polymerase subunit alpha
Q88QL0	3822533333	5882033333	6445300000	8871166667	9054333333	9307200000	PP_0480		6.16367e+09	0.0456925	1.61246	0.430894	50S ribosomal protein L17
Q88QK9	0	0	0	0	9447000	0	PP_0481		1e-05	0	#DIV/0!	#DIV/0!	Catalase
Q88QK8	2.70417e+08	38844000	35304000	3.61873e+07	3.50803e+07	43377000	PP_0482		3.7074e+07	0.0477424	0.1371	7.47269	Ferroxidase
Q88QK7	2.12433e+08	2.26637e+08	2.38413e+08	2.69263e+08	2.54837e+08	2.45213e+08	PP_0483		2.32525e+08	0.0253234	1.09458	0.788943	UvrABC system protein A
Q88QK6	0	0	0	0	0	2.80597e+07	PP_0484		1e-05	0	#DIV/0!	#DIV/0!	Major facilitator family transporter
Q88QK5	344710000	361040000	4.68777e+08	5.22107e+08	7.15083e+08	6.06573e+08	PP_0485		4.14908e+08	0.129832	1.20364	0.660229	Single-stranded DNA-binding protein
Q88QK4	20769000	18657000	2.46903e+07	10993000	0	0	PP_0486		2.16737e+07	0.139186	1.04356	1.88929	Transcriptional regulator, GntR family
Q88QJ9	0	0	0	0	0	5474000	PP_0492		1e-05	0	#DIV/0!	#DIV/0!	Protein FdhE homolog
Q88QJ8	9.84487e+07	5.90303e+07	1.00685e+08	6.74543e+07	3.04297e+07	59567000	PP_0493		7.98575e+07	0.260804	0.811159	1.45949	L-seryl-tRNA(Sec) selenium transferase
Q88QJ5	0	0	0	0	0	1.64683e+06	PP_0496		1e-05	0	#DIV/0!	#DIV/0!	Sodium/alanine symporter
Q88QJ2	152110000	129960000	160940000	1.51307e+08	1.58013e+08	165120000	PP_0500		1.4545e+08	0.106497	0.956216	1.00531	dTDP-4-rhamnose reductase-related protein
Q88QJ1	0	0	0	0	7.53533e+06	0	PP_0501		1e-05	0	#DIV/0!	#DIV/0!	NAD-dependent epimerase/dehydratase family protein
Q88QI3	0	0	0	0	4.53167e+06	0	PP_0509		1e-05	0	#DIV/0!	#DIV/0!	Uncharacterized protein
Q88QI2	540360000	8.37687e+08	6.37097e+08	8.62593e+08	1057090000	680090000	PP_0510		7.37392e+08	0.136013	1.36463	0.626437	Thioredoxin
Q88QI1	1.47517e+08	1.79847e+08	115400000	1.36717e+08	1.46607e+08	1.16333e+08	PP_0512		1.47623e+08	0.218281	1.00072	1.079	Uncharacterized protein
Q88QI0	55897000	9.69457e+07	5.33033e+07	6.54103e+07	54761000	3.06833e+07	PP_0513		7.51245e+07	0.290467	1.34398	0.854559	Transcriptional repressor NrdR
Q88QH9	2.49733e+07	1.15727e+07	7.22833e+06	0	0	0	PP_0514		9.4005e+06	0.231069	0.376422	#DIV/0!	Riboflavin biosynthesis protein RibD
Q88QH8	287990000	2.47593e+08	2.56167e+08	1.84927e+08	226320000	1.50933e+08	PP_0515		2.5188e+08	0.0170187	0.874614	1.55732	Riboflavin synthase, alpha subunit
Q88QH7	6.47907e+08	8.20067e+08	6.21363e+08	970470000	1092360000	8.65437e+08	PP_0516		7.20715e+08	0.137852	1.11237	0.667622	3,4-dihydroxy-2-butanone 4-phosphate synthase
Q88QH6	7.91167e+07	23232000	5.29693e+07	44420000	5.03533e+07	3.64067e+07	PP_0517		3.81007e+07	0.390247	0.481576	1.7811	6,7-dimethyl-8-ribityllumazine synthase
Q88QH5	2.61113e+08	304560000	2.73477e+08	3.57513e+08	3.45303e+08	3.78173e+08	PP_0518		2.89018e+08	0.053774	1.10687	0.73036	N utilization substance protein B homolog
Q88QH4	0	0	0	9259000	0	50487000	PP_0519		1e-05	0	#DIV/0!	0	Thiamine-monophosphate kinase
Q88QH2	9.06933e+06	0	0	0	0	0	PP_0521		1e-05	0	1.10262e-12	#DIV/0!	Uncharacterized protein
Q88QH1	2.87557e+08	2.93123e+08	3.21207e+08	4.43573e+08	4.13687e+08	4.12233e+08	PP_0522		3.07165e+08	0.0457138	1.06819	0.648273	GTP cyclohydrolase-2
Q88QG7	5.19617e+08	6.01523e+08	497860000	9.21743e+08	9.23113e+08	7.83473e+08	PP_0527		5.49692e+08	0.0942923	1.05788	0.563732	1-deoxy-D-xylulose-5-phosphate synthase
Q88QG6	332360000	6.22193e+08	2.26427e+08	470070000	6.95313e+08	3.97827e+08	PP_0528		4.2431e+08	0.466365	1.27666	0.707044	Geranyltranstransferase
Q88QG5	1.06118e+08	1.53917e+08	1.32383e+08	1.76567e+08	2.43113e+08	1.43657e+08	PP_0529		1.4315e+08	0.0752125	1.34897	0.601006	Exodeoxyribonuclease 7 small subunit
Q88QF8	0	0	0	0	0	4012000	PP_0536		1e-05	0	#DIV/0!	#DIV/0!	Uncharacterized protein
Q88QF6	3878300000	4857233333	4312066667	3419566667	4787566667	3786566667	PP_0538		4.58465e+09	0.0594556	1.18213	1.13415	Inorganic pyrophosphatase
Q88QF3	5.28303e+08	4.21317e+08	3.63357e+08	6.92477e+07	1.10258e+08	8.76887e+07	PP_0541		3.92337e+08	0.0738651	0.742635	7.62919	Acetyltransferase, GNAT family
Q88QF2	266520000	2.54863e+08	1.24823e+08	0	0	0	PP_0542		1.89843e+08	0.342493	0.712304	#DIV/0!	Ethanolamine ammonia-lyase light chain
Q88QF1	3.33783e+08	4.56453e+08	1.22608e+08	45592000	4.65813e+07	3.57763e+07	PP_0543		2.89531e+08	0.576529	0.86742	7.32109	Ethanolamine ammonia-lyase, heavy subunit
Q88QF0	109130000	1.66737e+08	132150000	0	0	1.18413e+07	PP_0544		1.49443e+08	0.115718	1.36941	#DIV/0!	Ethanolamine transporter
Q88QE9	3745700000	6764800000	5244233333	1500466667	1264333333	1361733333	PP_0545		6.00452e+09	0.126619	1.60304	2.49636	Aldehyde dehydrogenase family protein
Q88QE7	3.80337e+08	3.31963e+08	2.94687e+08	3.17933e+08	315760000	290140000	PP_0547		3.13325e+08	0.0594856	0.82381	1.19628	UDP-N-acetylmuramate--L-alanyl-gamma-D-glutamyl-meso-2,6-diaminoheptandioate ligase
Q88QE4	0	0	0	0	0	17540000	PP_0550		1e-05	0	#DIV/0!	#DIV/0!	Uncharacterized protein
Q88QE2	0	0	0	0	0	5.88733e+06	PP_0552		1e-05	0	#DIV/0!	#DIV/0!	2,3-butanediol dehydrogenase
Q88QD6	10500333333	9245533333	10375600000	7840300000	7846366667	8989300000	PP_0558		9.81057e+09	0.0575944	0.93431	1.33928	Acetyl-CoA carboxylase, biotin carboxylase
Q88QD5	3364833333	3517133333	3168933333	3614733333	3302833333	3968400000	PP_0559		3.34303e+09	0.0520785	0.993521	0.930866	Acetyl-CoA carboxylase, biotin carboxyl carrier protein
Q88QD1	0	3.10243e+06	0	0	0	0	PP_0563		1.55122e+06	1	#DIV/0!	#DIV/0!	Response regulator
Q88QD0	1352933333	1831933333	1453066667	1066560000	1425633333	1140933333	PP_0564		1.6425e+09	0.115332	1.21403	1.2685	Uncharacterized protein
Q88QC8	0	0	0	0	0	1.72963e+07	PP_0566		1e-05	0	#DIV/0!	#DIV/0!	Translation initiation factor SUI1
Q88QC7	388960000	677060000	3.88787e+08	5.53577e+08	9.66183e+08	4.94617e+08	PP_0567		5.32923e+08	0.270464	1.37012	0.702631	Biosynthetic arginine decarboxylase
Q88QC4	8.97163e+08	8.32837e+08	809430000	6.13097e+08	2.75937e+08	5.55213e+08	PP_0570		8.21133e+08	0.0142527	0.915255	1.46333	Extracellular protein, putative
Q88QC0	6.08657e+07	58897000	1.36055e+08	18534000	0	0	PP_0574		9.74758e+07	0.395778	1.60149	3.284	DNA-binding response regulator, LuxR family
Q88QB8	8.56537e+08	1.44093e+08	184650000	102671000	91215000	8.28437e+07	PP_0576		1.64372e+08	0.123369	0.191903	8.34254	Lipoprotein, putative
Q88QB6	1.08137e+07	2.36923e+07	0	0	0	0	PP_0578		1.18462e+07	1	1.09548	#DIV/0!	Methyltransferase, putative
Q88QB3	6.81737e+08	4.60507e+08	2.88483e+08	5.45437e+07	6.87847e+07	6.60133e+07	PP_0581		3.74495e+08	0.229674	0.549325	12.4989	3-oxoacyl-(Acyl-carrier-protein) reductase
Q88QB2	1.94563e+08	56600000	5.42297e+07	28950000	2.00207e+07	18781000	PP_0582		5.54148e+07	0.0213872	0.284816	6.72067	Thiolase family protein
Q88QB0	1609700000	1335233333	5.31497e+08	1086033333	600060000	9.48947e+08	PP_0584		9.33365e+08	0.430559	0.579838	1.48218	Methyl-accepting chemotaxis transducer
Q88QA8	155570000	5.94527e+07	5.20163e+07	0	1.38287e+07	1.37757e+07	PP_0586		5.57345e+07	0.0667121	0.35826	#DIV/0!	Heavy metal translocating P-type ATPase
Q88QA7	12648000	7.93833e+07	3.55937e+07	3.71777e+07	20325000	6.50567e+06	PP_0587		5.74885e+07	0.380856	4.54526	0.340204	Uncharacterized protein
Q88QA6	0	0	0	0	0	7.37633e+06	PP_0588		1e-05	0	#DIV/0!	#DIV/0!	Copper-binding protein, putative
Q88QA3	2.27813e+08	9.13807e+07	2.40873e+08	1.29749e+08	6.05123e+07	8.34933e+07	PP_0591		1.66127e+08	0.449935	0.729224	1.7558	Adenine deaminase
Q88QA2	5.09283e+08	3.80553e+08	1.91227e+08	9.19913e+07	143500000	6.75627e+07	PP_0592		2.8589e+08	0.331118	0.561357	5.53621	Oxidoreductase, short chain dehydrogenase/reductase family
Q88QA0	5.50473e+07	1.06623e+08	5.60727e+07	8.00907e+07	90354000	7.13893e+07	PP_0594		8.1348e+07	0.310706	1.47778	0.687313	Transcriptional regulator, TetR family
Q88Q99	0	1.69133e+07	0	0	0	0	PP_0595		8.45667e+06	1	#DIV/0!	#DIV/0!	Transcriptional regulator, LysR family
Q88Q98	0	0	0	0	0	4111000	PP_0596		1e-05	0	#DIV/0!	#DIV/0!	Beta-alanine--pyruvate transaminase
Q88Q97	834690000	1572633333	8.99013e+08	774590000	1365166667	5.24283e+08	PP_0597		1.23582e+09	0.272539	1.48058	1.07759	Methylmalonate-semialdehyde dehydrogenase
Q88Q96	2.21373e+08	1.91787e+08	1.74843e+08	2.16303e+08	1.74377e+08	180480000	PP_0599		1.83315e+08	0.0462137	0.828081	1.02344	PqiB family protein
Q88Q95	2618900000	3813433333	3430466667	3861633333	7586333333	5570733333	PP_0600		3.62195e+09	0.0528675	1.383	0.678185	30S ribosomal protein S20
Q88Q93	227830000	2.30503e+08	1.98123e+08	296380000	246700000	251850000	PP_0602		2.14313e+08	0.0755436	0.940672	0.768709	Riboflavin biosynthesis protein
Q88Q92	1732433333	1891033333	1752733333	3168333333	2970000000	2797966667	PP_0603		1.82188e+09	0.0379552	1.05163	0.546796	Isoleucine--tRNA ligase
Q88Q90	2.34857e+08	301380000	2.57873e+08	4.38693e+08	399690000	392440000	PP_0605		2.79627e+08	0.0777942	1.19063	0.535355	Peptidyl-prolyl cis-trans isomerase
Q88Q89	344820000	462340000	420160000	5.85327e+08	6.30277e+08	599480000	PP_0606		4.4125e+08	0.047796	1.27965	0.589107	4-hydroxy-3-methylbut-2-enyl diphosphate reductase
Q88Q83	0	0	0	0	0	7675000	PP_0612		1e-05	0	#DIV/0!	#DIV/0!	Oxidoreductase, FAD-binding
Q88Q81	0	6.50283e+07	1.76923e+07	0	0	0	PP_0614		4.13603e+07	0.572239	#DIV/0!	#DIV/0!	N-carbamoyl-beta-alanine amidohydrolase, putative
Q88Q76	4.11273e+07	1.90923e+07	0	0	0	0	PP_0619		9.54617e+06	1	0.232112	#DIV/0!	Branched-chain amino acid ABC transporter, periplasmic amino acid-binding protein
Q88Q74	0	0	0	0	0	8.22467e+06	PP_0621		1e-05	0	#DIV/0!	#DIV/0!	Uncharacterized protein
Q88Q73	1947500000	1816100000	2017700000	2550000000	2438700000	2361300000	PP_0622		1.9169e+09	0.0525849	0.984288	0.763725	Outer membrane protein assembly factor BamD
Q88Q72	0	0	0	0	7.61167e+06	0	PP_0624		1e-05	0	#DIV/0!	#DIV/0!	Laccase domain protein
Q88Q71	3211500000	3324833333	2905666667	2713866667	1971966667	2609600000	PP_0625		3.11525e+09	0.0672766	0.97003	1.18337	Chaperone-associated ATPase, putative
Q88Q70	143540000	1.24783e+08	3.34447e+08	1.54437e+08	85284000	1.20497e+08	PP_0626		2.29615e+08	0.456554	1.59966	0.929442	NADH dehydrogenase
Q88Q65	6.24533e+06	0	0	0	0	0	PP_0631		1e-05	0	1.6012e-12	#DIV/0!	Dephospho-CoA kinase
Q88Q62	0	0	0	0	0	1.44923e+07	PP_0634		1e-05	0	#DIV/0!	#DIV/0!	Type IV pili prepilin PilA
Q88Q59	0	0	0	0	0	8864000	PP_0639		1e-05	0	#DIV/0!	#DIV/0!	Uncharacterized protein
Q88Q58	6.77477e+07	9.23747e+07	1.17767e+08	195620000	1.11763e+08	1.06926e+08	PP_0640		1.05071e+08	0.120833	1.55091	0.346323	Uncharacterized protein
Q88Q44	1.23757e+08	6.79667e+07	5.70393e+07	51543000	5.90127e+07	5.92087e+07	PP_0654		6.2503e+07	0.0874145	0.505048	2.40104	Probable malate dehydrogenase
Q88Q40	0	0	0	6.80567e+07	0	0	PP_0658		1e-05	0	#DIV/0!	0	Homocysteine S-methyltransferase family protein
Q88Q27	7133100000	7701733333	8544433333	11858666667	10767300000	11560666667	PP_0671		8.12308e+09	0.0518707	1.13879	0.601509	Serine hydroxymethyltransferase 2
Q88Q25	32371000	6.39683e+07	1.05691e+08	4.17913e+08	608280000	5.97243e+08	PP_0673		8.48298e+07	0.245922	2.62055	0.0774586	Uncharacterized protein
Q88Q24	2313033333	3139400000	3046600000	4615800000	4022866667	3349200000	PP_0674		3.093e+09	0.0150016	1.33721	0.501112	ABC transporter, ATP-binding protein
Q88Q23	1.15919e+08	1.56607e+08	2.66097e+08	876850000	177810000	256320000	PP_0675		2.11352e+08	0.259023	1.82328	0.132199	Glutamate dehydrogenase
Q88Q18	1223633333	1392933333	1081833333	1628233333	1653733333	1352733333	PP_0680		1.23738e+09	0.125709	1.01124	0.75151	ATP-dependent protease, putative
Q88Q14	465920000	1045976667	1021353333	2139366667	1849833333	1890566667	PP_0684		1.03367e+09	0.0119107	2.21855	0.217784	Peptidyl-prolyl cis-trans isomerase
Q88Q12	70638000	137965000	1.86467e+08	334510000	2.76493e+08	2.43923e+08	PP_0686		1.62216e+08	0.149497	2.29644	0.211169	PhnA protein
Q88Q11	500560000	1172600000	6.67353e+08	1328900000	1080766667	1082833333	PP_0687		9.19977e+08	0.274598	1.83789	0.376672	Octylprenyl diphosphate synthase
Q88Q10	3605933333	4506900000	4921700000	8245300000	8516400000	7994233333	PP_0688		4.7143e+09	0.0439938	1.30737	0.437332	50S ribosomal protein L21
Q88Q09	2076200000	3500400000	4161533333	6631200000	5429400000	5623300000	PP_0689		3.83097e+09	0.0862881	1.84518	0.313096	50S ribosomal protein L27
Q88Q08	355490000	664140000	5.32653e+08	8.40483e+08	8.77377e+08	7.15447e+08	PP_0690		5.98397e+08	0.109866	1.6833	0.422959	GTPase Obg
Q88Q07	5.67283e+08	6.66917e+08	658040000	9.43923e+08	808040000	7.52277e+08	PP_0691		6.62478e+08	0.00669959	1.16781	0.600985	Glutamate 5-kinase
Q88Q06	0	0	0	4.42067e+06	0	0	PP_0692		1e-05	0	#DIV/0!	0	CreA protein
Q88Q05	5.13293e+08	885680000	8.43597e+08	1569666667	1331066667	1414400000	PP_0693		8.64638e+08	0.0243358	1.68449	0.327008	Uncharacterized protein
Q88Q04	85715000	1.43197e+08	155160000	331660000	220610000	2.49717e+08	PP_0694		1.49178e+08	0.0400974	1.7404	0.258442	Uncharacterized protein
Q88Q03	58349000	5.95103e+07	7.61087e+07	6.76683e+07	7.52567e+07	8.91157e+07	PP_0695		6.78095e+07	0.122389	1.16214	0.862279	Uncharacterized protein
Q88Q01	0	0	1.10283e+07	4.69967e+07	0	52110000	PP_0697		5.51417e+06	1	#DIV/0!	0	Acetyltransferase, GNAT family
Q88PZ1	9.04437e+07	6.95027e+07	6.03603e+07	7.39577e+07	64138000	8.65777e+07	PP_0707		6.49315e+07	0.0703998	0.717922	1.22291	Membrane protein, putative
Q88PY7	2346033333	501580000	7.54213e+08	1.47593e+08	127796000	1.12805e+08	PP_0711		6.27897e+08	0.201174	0.267642	15.8953	Hydrolase, isochorismatase family
Q88PY6	125674000	31561000	0	0	0	0	PP_0712		1.57805e+07	1	0.125567	#DIV/0!	Uncharacterized protein
Q88PX9	1221666667	1986200000	1623400000	2841600000	3134266667	3070166667	PP_0719		1.8048e+09	0.10051	1.47733	0.429922	Ribosome-binding ATPase YchF
Q88PX8	0	0	0	0	0	3.06917e+07	PP_0720		1e-05	0	#DIV/0!	#DIV/0!	Peptidyl-tRNA hydrolase
Q88PX7	7027200000	9775933333	12353000000	12336000000	14688000000	15048333333	PP_0721		1.10645e+10	0.116457	1.57452	0.56965	50S ribosomal protein L25
Q88PX6	6.80243e+08	1020133333	952200000	2803433333	2312133333	2154466667	PP_0722		9.86167e+08	0.0344431	1.44973	0.242647	Ribose-phosphate pyrophosphokinase
Q88PX4	1.15999e+08	6.67127e+07	115619000	8.15373e+07	6.53897e+07	9.12103e+07	PP_0724		9.11658e+07	0.268227	0.785921	1.42264	Outer-membrane lipoprotein LolB
Q88PX3	5.90307e+08	4.33303e+08	5.28033e+08	486230000	5.04803e+08	5.31317e+08	PP_0725		4.80668e+08	0.0985399	0.814269	1.21405	TPR domain protein
Q88PW6	0	0	0	0	0	2.61763e+07	PP_0732		1e-05	0	#DIV/0!	#DIV/0!	Glutamyl-tRNA reductase
Q88PW5	0	0	0	0	2.91513e+07	0	PP_0733		1e-05	0	#DIV/0!	#DIV/0!	Peptide chain release factor 1
Q88PW4	5.91843e+07	5.38387e+07	5.17247e+07	7.20293e+07	6.70027e+07	57924000	PP_0734		5.27817e+07	0.0200259	0.891818	0.82167	Release factor glutamine methyltransferase
Q88PW3	73636000	7.46787e+07	7.62327e+07	1.36492e+08	9.55163e+07	9.62123e+07	PP_0735		7.54557e+07	0.0102974	1.02471	0.539491	Molybdopterin biosynthesis MoeB protein, putative
Q88PW0	7.17113e+07	97480000	75716000	9.90033e+07	1.46603e+08	1.21563e+08	PP_0738		8.6598e+07	0.125661	1.20759	0.724333	Conserved domain protein
Q88PV9	1.92133e+08	2.77477e+08	234830000	360630000	324560000	281770000	PP_0739		2.56153e+08	0.0832444	1.33321	0.532771	Deoxyribodipyrimidine photolyase
Q88PV6	2.06877e+08	238480000	1.53167e+08	1.52983e+08	144370000	1.46027e+08	PP_0742		1.95823e+08	0.217832	0.94657	1.35228	Uncharacterized protein
Q88PV5	62580000	2.57003e+07	33400000	3.07113e+07	33887000	2.71037e+07	PP_0743		2.95502e+07	0.130281	0.472198	2.03768	Uncharacterized protein
Q88PV4	2.00077e+07	4.31567e+07	1.67693e+07	5.71777e+07	0	0	PP_0744		2.9963e+07	0.440332	1.49758	0.349921	Ferrochelatase
Q88PV2	388280000	319930000	2.82967e+08	395630000	461560000	472110000	PP_0746		3.01448e+08	0.0613096	0.776368	0.981422	Uracil phosphoribosyltransferase
Q88PV1	171450000	4.33917e+08	1.23667e+08	1.95323e+08	636310000	170710000	PP_0747		2.78792e+08	0.556419	1.62608	0.877775	Hypoxanthine phosphoribosyltransferase, putative
Q88PV0	0	0	0	0	0	3.71567e+06	PP_0748		1e-05	0	#DIV/0!	#DIV/0!	Uncharacterized protein
Q88PU8	9.88693e+08	1392366667	1274166667	3050900000	2696900000	2529000000	PP_0750		1.33327e+09	0.0443272	1.34851	0.324066	Uncharacterized protein
Q88PU7	2122033333	1798600000	1895500000	4265700000	3374133333	3932433333	PP_0751		1.84705e+09	0.026231	0.870415	0.497464	Probable malate:quinone oxidoreductase 1
Q88PU5	1632433333	1059096667	1337900000	2161466667	1306800000	1830000000	PP_0753		1.1985e+09	0.116314	0.734179	0.755243	Lipoprotein, putative
Q88PU2	89548000	77236000	86621000	97575000	1.20717e+08	9.74253e+07	PP_0756		8.19285e+07	0.0572756	0.914912	0.917735	Uncharacterized protein
Q88PT9	9.04913e+08	7.93967e+08	7.68227e+08	6.00083e+08	567560000	635800000	PP_0759		7.81097e+08	0.0164768	0.863173	1.50798	Uncharacterized protein
Q88PT6	168020000	3.62897e+08	1.52847e+08	2.56217e+08	314060000	2.32573e+08	PP_0762		2.57872e+08	0.407276	1.53477	0.655773	Glycerate dehydrogenase
Q88PT5	5.80227e+08	1030973333	6.41777e+08	2.00907e+08	1.37497e+08	1.62117e+08	PP_0763		8.36375e+08	0.232669	1.44146	2.88804	Medium-chain-fatty-acid CoA ligase
Q88PT3	0	0	4706000	0	0	0	PP_0765		2.353e+06	1	#DIV/0!	#DIV/0!	Uncharacterized protein
Q88PT2	5304266667	6741833333	4630600000	1137600000	987120000	1381233333	PP_0766		5.68622e+09	0.185645	1.07201	4.66268	Uncharacterized protein
Q88PT0	194620000	253730000	70282000	230170000	8.91567e+07	174410000	PP_0768		1.62006e+08	0.566177	0.832422	0.845549	Response regulator/TPR domain protein
Q88PS9	23051000	2.03073e+07	0	0	0	0	PP_0769		1.01537e+07	1	0.440487	#DIV/0!	Sensor histidine kinase
Q88PS5	3.75983e+08	356500000	1086833333	577280000	2.41467e+08	694280000	PP_0773		7.21667e+08	0.506005	1.91941	0.651302	OmpA family protein
Q88PS4	1.58527e+08	259130000	166190000	144130000	201560000	1.72943e+08	PP_0774		2.1266e+08	0.218518	1.34148	1.09989	Phosphate acetyltransferase
Q88PS2	3065766667	2945766667	2779566667	3257266667	3432700000	4015233333	PP_0776		2.86267e+09	0.0290289	0.933752	0.941208	Peptidyl-prolyl cis-trans isomerase
Q88PS1	104832000	4.75163e+07	0	0	0	0	PP_0777		2.37582e+07	1	0.226631	#DIV/0!	Glutathione peroxidase
Q88PR9	3.45233e+06	5.16867e+07	0	0	0	0	PP_0779		2.58433e+07	1	7.48576	#DIV/0!	Methyl-accepting chemotaxis transducer/sensory box protein
Q88PR2	515630000	9.66777e+08	929990000	1385566667	1407400000	1018493333	PP_0786		9.48383e+08	0.0193944	1.83927	0.372144	Thioredoxin reductase
Q88PR1	202700000	2.38613e+08	239300000	186160000	2.47057e+08	1.98657e+08	PP_0787		2.38957e+08	0.0014368	1.17887	1.08885	Nicotinate-nucleotide pyrophosphorylase
Q88PQ9	0	0	1.70893e+07	0	0	0	PP_0789		8.54467e+06	1	#DIV/0!	#DIV/0!	N-acetyl-anhydromuramyl-L-alanine amidase AmpD
Q88PQ8	6.69953e+07	9138000	2.76143e+07	5.92667e+06	0	0	PP_0790		1.83762e+07	0.502725	0.27429	11.304	Inner membrane protein AmpE
Q88PQ6	1.89923e+08	119630000	120710000	208300000	1.82397e+08	204240000	PP_0792		1.2017e+08	0.00449363	0.632729	0.911778	Fructose transport system repressor FruR
Q88PQ5	149680000	84712000	102973000	551620000	4.13593e+08	4.62913e+08	PP_0793		9.38425e+07	0.097296	0.626954	0.271346	Phosphotransferase system, fructose-specific EI/HPr/EIIA components
Q88PQ4	4.53883e+07	3.92203e+07	42170000	3.27873e+08	1.08107e+08	1.90383e+08	PP_0794		4.06952e+07	0.036241	0.8966	0.138433	Phosphofructokinase
Q88PQ1	4.19947e+08	1.19433e+08	867390000	414730000	305920000	3.71753e+08	PP_0797		4.93412e+08	0.757944	1.17494	1.01258	Uncharacterized protein
Q88PP7	0	0	0	0	0	1.19233e+07	PP_0801		1e-05	0	#DIV/0!	#DIV/0!	Uncharacterized protein
Q88PP6	1.85593e+08	91698000	3.24703e+07	37682000	2.39633e+07	37170000	PP_0802		6.20842e+07	0.476995	0.334517	4.92525	Chemotaxis protein CheV
Q88PP5	4.55077e+08	6.35183e+08	5.41923e+08	2.97223e+08	0	2.07803e+08	PP_0803		5.88553e+08	0.0792282	1.29331	1.53109	Protein secretion ABC efflux system, membrane fusion protein
Q88PP4	117190000	1.77213e+08	96850000	8.06643e+07	3.83623e+07	7.46073e+07	PP_0804		1.37032e+08	0.293229	1.16931	1.45281	Protein secretion ABC efflux system, permease and ATP-binding protein
Q88PP3	0	3595000	0	0	0	0	PP_0805		1.7975e+06	1	#DIV/0!	#DIV/0!	Outer membrane efflux protein
Q88PP2	8.98117e+08	6.58227e+08	5.77837e+08	47888000	79483000	7.55427e+07	PP_0806		6.18032e+08	0.0650371	0.688142	18.7545	Surface adhesion protein, putative
Q88PP0	4.27953e+07	0	0	0	36180000	0	PP_0808		1e-05	0	2.3367e-13	#DIV/0!	Flavohemoprotein
Q88PN7	2.40067e+08	951020000	4.28953e+08	6.26743e+08	7.34033e+08	5.81503e+08	PP_0812		6.89987e+08	0.378316	2.87415	0.383038	Cytochrome o ubiquinol oxidase, subunit II
Q88PN6	3.64813e+08	1416800000	7.53777e+08	1270936667	1161800000	990330000	PP_0813		1.08529e+09	0.30546	2.97491	0.287043	Cytochrome o ubiquinol oxidase, subunit I
Q88PN2	1183900000	494040000	524880000	560420000	4.06443e+08	445360000	PP_0817		5.0946e+08	0.0302673	0.430324	2.11252	Aminotransferase, class I
Q88PM7	0	0	0	0	6246000	0	PP_0822		1e-05	0	#DIV/0!	#DIV/0!	tRNA 2-selenouridine synthase
P59392	1.10293e+08	1.59053e+08	123433000	94857000	75976000	9.67273e+07	PP_0823		1.41243e+08	0.126096	1.28062	1.16273	Selenide, water dikinase
Q88PM6	9.36277e+08	712290000	748110000	582540000	4.12147e+08	574410000	PP_0824		7.302e+08	0.0245275	0.779898	1.60723	Phosphate ABC transporter, periplasmic phosphate-binding protein, putative
Q88PL8	0	0	2.74647e+07	0	0	0	PP_0832		1.37323e+07	1	#DIV/0!	#DIV/0!	S-adenosylmethionine:tRNA ribosyltransferase-isomerase
Q88PL7	457240000	6.28847e+08	6.00713e+08	8.43963e+08	7.41023e+08	8.25083e+08	PP_0833		6.1478e+08	0.0228808	1.34455	0.541777	Queuine tRNA-ribosyltransferase
Q88PL6	1105200000	1576433333	1610366667	1704933333	1323733333	1858066667	PP_0834		1.5934e+09	0.0106481	1.44173	0.648236	Preprotein translocase, YajC subunit
Q88PL5	6.50367e+08	862400000	7.90293e+08	1271500000	1150133333	1170733333	PP_0835		8.26347e+08	0.0436298	1.27059	0.511496	Protein translocase subunit SecD
Q88PL4	0	0	0	0	0	1.16363e+07	PP_0836		1e-05	0	#DIV/0!	#DIV/0!	Protein-export membrane protein SecF
Q88PL3	1.65977e+08	126259000	1222400000	288940000	1.88643e+08	5.31083e+08	PP_0837		6.7433e+08	0.812764	4.0628	0.574433	Uncharacterized protein
Q88PL2	1152600000	1611366667	1357233333	1878600000	1670933333	1759633333	PP_0838		1.4843e+09	0.0856071	1.28778	0.613542	Extragenic suppressor protein SuhB
Q88PL1	1.26177e+08	1.26297e+08	130630000	189700000	146630000	1.53173e+08	PP_0839		1.28463e+08	0.016866	1.01812	0.665138	tRNA (cytidine/uridine-2'-O-)-methyltransferase TrmJ
Q88PL0	85081000	90878000	1.07163e+08	9.88847e+07	1.13181e+08	1.18187e+08	PP_0840		9.90207e+07	0.082232	1.16384	0.860406	Serine O-acetyltransferase
Q88PK9	1.74243e+08	90795000	1.26523e+08	2.36263e+08	2.24223e+08	286390000	PP_0841		1.08659e+08	0.164406	0.623606	0.737496	Rrf2 family protein
Q88PK8	4906900000	3176933333	3694300000	5140366667	4501300000	4652900000	PP_0842		3.43562e+09	0.0752946	0.70016	0.954582	Cysteine desulfurase IscS
Q88PK7	1925266667	1637266667	1456100000	3118200000	2488900000	2858533333	PP_0843		1.54668e+09	0.0585662	0.803361	0.617429	Iron-sulfur cluster assembly scaffold protein IscU
Q88PK6	3.58413e+08	337960000	3.38387e+08	490810000	395140000	5.38793e+08	PP_0844		3.38173e+08	0.00063084	0.943529	0.730249	Iron-binding protein IscA
Q88PK5	127954000	1.26884e+08	1.01011e+08	1.55603e+08	117240000	132790000	PP_0845		1.13948e+08	0.113533	0.890535	0.822309	Co-chaperone protein HscB homolog
Q88PK4	5.54867e+08	544750000	535890000	1013403333	8.51477e+08	885640000	PP_0846		5.4032e+08	0.00819885	0.973783	0.547528	Chaperone protein HscA homolog
Q88PK3	3.52787e+08	248300000	292100000	4.22547e+08	438350000	4.87213e+08	PP_0847		2.702e+08	0.0810511	0.765902	0.834906	Ferredoxin, 2Fe-2S
Q88PK2	0	0	0	0	0	1.51897e+07	PP_0848		1e-05	0	#DIV/0!	#DIV/0!	Uncharacterized protein
Q88PK1	8656100000	10392066667	10861666667	15399333333	14328333333	14556000000	PP_0849		1.06269e+10	0.0220949	1.22767	0.562109	Nucleoside diphosphate kinase
Q88PK0	6.39147e+07	8.98457e+07	8.58617e+07	185410000	1.33633e+08	142500000	PP_0850		8.78537e+07	0.0226741	1.37455	0.344721	Dual-specificity RNA methyltransferase RlmN
Q88PJ8	2.75363e+08	2.55327e+08	3.12283e+08	454730000	382720000	3.98737e+08	PP_0852		2.83805e+08	0.100345	1.03066	0.605553	Transcriptional regulator, Cro/CI family
Q88PJ7	6.93423e+08	844340000	7.97587e+08	1273166667	1066506667	1300566667	PP_0853		8.20963e+08	0.0284747	1.18393	0.544645	4-hydroxy-3-methylbut-2-en-1-yl diphosphate synthase (flavodoxin)
Q88PJ6	7.79753e+08	1036240000	9.73323e+08	2072266667	1539200000	1571133333	PP_0854		1.00478e+09	0.0313086	1.28859	0.37628	Histidine--tRNA ligase
Q88PJ5	7.13427e+08	1077946667	9.69463e+08	1803633333	1541000000	1595766667	PP_0855		1.02371e+09	0.0529856	1.43491	0.39555	Uncharacterized protein
Q88PJ4	3.93167e+08	412330000	4.85577e+08	6.90277e+08	4.91843e+08	6.57107e+08	PP_0856		4.48953e+08	0.0815749	1.14189	0.569578	Outer membrane protein assembly factor BamB
Q88PJ3	1125466667	1105200000	8.28737e+08	1300933333	1451033333	1115740000	PP_0857		9.66968e+08	0.142954	0.859171	0.865122	GTPase Der
Q88PJ2	7.73333e+06	0	0	0	0	0	PP_0858		1e-05	0	1.2931e-12	#DIV/0!	Aminotransferase, class I
Q88PJ1	1.17533e+08	6.74653e+07	8.80767e+07	8.15267e+07	4.36563e+07	88698000	PP_0859		7.7771e+07	0.132513	0.661697	1.44165	Carbon-nitrogen hydrolase family protein
Q88PI6	6.88793e+08	866480000	733500000	1981866667	2328900000	1841266667	PP_0864		7.9999e+08	0.0831135	1.16144	0.347548	Ornithine decarboxylase, putative
Q88PI2	0	0	0	8.46667e+06	0	0	PP_0868		1e-05	0	#DIV/0!	0	Glycine betaine/carnitine/choline ABC transporter, ATP-binding protein, putative
Q88PH8	2.18877e+08	2.27323e+08	202240000	375430000	4.04763e+08	355970000	PP_0872		2.14782e+08	0.0583926	0.981291	0.583003	Peptide chain release factor 3
Q88PH2	4.23357e+07	3.96287e+08	46891000	37438000	4.26913e+07	3.74443e+07	PP_0878		2.21589e+08	0.788387	5.23409	1.13082	Dipeptide ABC transporter, ATP-binding protein
Q88PH1	52959000	2.66657e+08	59959000	57151000	56753000	46838000	PP_0879		1.63308e+08	0.632847	3.08367	0.92665	Dipeptide ABC transporter, ATP-binding protein
Q88PG9	5.48177e+07	3.86787e+08	7.38073e+07	41237000	8.69887e+07	6.09337e+07	PP_0881		2.30297e+08	0.679512	4.20115	1.32933	Dipeptide ABC transporter, permease protein
Q88PG8	1.69443e+08	1674666667	388550000	80549000	2.32883e+08	8.18977e+07	PP_0882		1.03161e+09	0.623355	6.08822	2.10361	Dipeptide ABC transporter, periplasmic dipeptide-binding protein
Q88PG6	3.80153e+07	1066800000	171965000	23976000	45513000	3.26643e+07	PP_0884		6.19383e+08	0.722361	16.293	1.58556	Dipeptide ABC transporter, periplasmic peptide-binding protein
Q88PG5	2246733333	5436633333	2372533333	8.47803e+08	1176033333	9.00403e+08	PP_0885		3.90458e+09	0.392372	1.73789	2.65006	Dipeptide ABC transporter, periplasmic peptide-binding protein
Q88PG4	1.96893e+08	2.62073e+08	4.68597e+08	1.67167e+08	1.48013e+08	2.82423e+08	PP_0886		3.65335e+08	0.282649	1.8555	1.17783	Uncharacterized protein
Q88PG2	3.87673e+07	0	2.58907e+07	1.15237e+07	1.40347e+07	0	PP_0888		1.29453e+07	1	0.333924	3.36415	Response regulator
Q88PF9	8.84733e+06	2.78087e+07	21416000	17864000	4.49857e+07	2.54157e+07	PP_0891		2.46123e+07	0.129867	2.78189	0.49526	Uncharacterized protein
Q88PF7	1343366667	2264166667	1077813333	502400000	6.50797e+08	5.03093e+08	PP_0893		1.67099e+09	0.354985	1.24388	2.6739	ThiJ/PfpI family protein
Q88PF3	3821500000	4120200000	4206833333	9276200000	6961666667	7579166667	PP_0897		4.16352e+09	0.0104039	1.0895	0.411968	Fumarate hydratase, class I
Q88PE9	72968000	1.56232e+08	5.63403e+07	36738000	1.41952e+08	7.46933e+06	PP_0901		1.06286e+08	0.469919	1.45662	1.98617	DNA-binding response regulator ColR
Q88PE6	8.48933e+06	4.92633e+07	1.79047e+07	2.64807e+07	17117000	1.81967e+07	PP_0904		3.3584e+07	0.466869	3.95602	0.320586	InaA protein
Q88PE3	1.39567e+08	4.69487e+07	5.50077e+07	0	0	0	PP_0907		5.09782e+07	0.0790436	0.36526	#DIV/0!	RND efflux membrane fusion protein-related protein
Q88PE1	2.02327e+08	2.11893e+08	211650000	524230000	316870000	5.43457e+08	PP_0909		2.11772e+08	0.000574518	1.04668	0.38595	Uncharacterized protein
Q88PD7	4052066667	9947966667	5940200000	12897000000	14953000000	12108666667	PP_0913		7.94408e+09	0.252249	1.9605	0.314187	Uncharacterized protein
Q88PD6	1.84443e+08	7.65883e+07	5.05157e+07	65856000	17776000	47793000	PP_0914		6.3552e+07	0.205129	0.344561	2.80071	GGDEF domain protein
Q88PD5	4313800000	3228400000	3103266667	2873333333	2269200000	3009433333	PP_0915		3.16583e+09	0.0197631	0.733885	1.50132	Superoxide dismutase [Fe]
Q88PD1	2.03037e+08	2.13403e+08	211100000	2.67747e+08	1.67353e+08	2.02003e+08	PP_0919		2.12252e+08	0.00542595	1.04539	0.758316	Uncharacterized protein
Q88PD0	1.43943e+08	310490000	2.84197e+08	532310000	4.14783e+08	427460000	PP_0920		2.97343e+08	0.0442138	2.0657	0.270413	Xenobiotic reductase B
Q88PC5	8.37467e+07	90096000	5.76587e+07	2.41607e+07	1.96997e+07	1.39157e+07	PP_0925		7.38773e+07	0.219535	0.882153	3.46624	Uncharacterized protein
Q88PC0	8.99117e+08	799660000	846710000	1070406667	1091300000	1121966667	PP_0930		8.23185e+08	0.028578	0.915549	0.839977	Aspartyl/glutamyl-tRNA(Asn/Gln) amidotransferase subunit B
Q88PB9	1139673333	1036033333	1126976667	1793266667	1350366667	1417700000	PP_0931		1.08151e+09	0.0420448	0.948961	0.635529	Glutamyl-tRNA(Gln) amidotransferase subunit A
Q88PB8	1.62277e+08	1.61133e+08	167510000	3.38157e+08	2.98487e+08	289130000	PP_0932		1.64322e+08	0.019403	1.0126	0.479886	Aspartyl/glutamyl-tRNA(Asn/Gln) amidotransferase subunit C
Q88PB7	2380966667	1938666667	2786000000	3938300000	2660700000	3552433333	PP_0933		2.36233e+09	0.179342	0.992174	0.604567	Rod shape-determining protein MreB
Q88PB6	9.20527e+07	1.21303e+08	9.44973e+07	139000000	1.06376e+08	1.25837e+08	PP_0934		1.079e+08	0.124216	1.17216	0.662249	Rod shape determining protein MreC
Q88PB4	21171000	0	0	0	0	0	PP_0936		1e-05	0	4.72344e-13	#DIV/0!	Maf-like protein PP_0936
Q88PB3	1.54177e+08	70788000	7.27883e+07	4.49273e+07	57074000	5.17087e+07	PP_0937		7.17882e+07	0.0139322	0.465623	3.43169	Cytoplasmic axial filament protein
Q88PB2	0	0	0	0	0	7.91767e+07	PP_0938		1e-05	0	#DIV/0!	#DIV/0!	Uncharacterized protein
Q88PB1	5.89487e+07	89821000	4.77907e+07	6.55303e+07	84321000	83645000	PP_0939		6.88058e+07	0.305427	1.16722	0.899563	Carbon-nitrogen hydrolase family protein
Q88PB0	2.69563e+08	283660000	2.64223e+08	3.85387e+08	283330000	3.47453e+08	PP_0940		2.73942e+08	0.0354759	1.01624	0.699462	TldD protein
Q88PA9	1.42813e+08	1.16702e+08	1.44097e+08	2.63833e+08	1.73113e+08	2.09573e+08	PP_0941		1.304e+08	0.10504	0.913077	0.541301	UPF0307 protein PP_0941
Q88PA8	5.52417e+08	767890000	7.10867e+08	7.68947e+08	6.21767e+08	679830000	PP_0942		7.39378e+08	0.0385617	1.33844	0.718407	PmbA protein
Q88PA1	2.21693e+08	1.86273e+08	118770000	139890000	102780000	95303000	PP_0949		1.52522e+08	0.221291	0.687985	1.58477	Nucleotide-binding protein PP_0949
Q88PA0	159560000	52070000	138420000	49010000	56720000	1.01913e+08	PP_0950		9.5245e+07	0.453305	0.596923	3.25566	Phosphotransferase system, nitrogen regulatory IIA protein
P0A147	4920233333	5031866667	5604900000	2341933333	2726666667	3334333333	PP_0951		5.31838e+09	0.0538729	1.08092	2.10093	Ribosome hibernation promoting factor
P0A171	2.36987e+08	2.29617e+08	230890000	2.02823e+08	220160000	2.37073e+08	PP_0952		2.30253e+08	0.00276507	0.971588	1.16844	RNA polymerase sigma-54 factor
Q88P99	6.02837e+08	4.20973e+08	4.88653e+08	605020000	440320000	5.16957e+08	PP_0953		4.54813e+08	0.0744042	0.754455	0.996391	ABC transporter, ATP-binding protein, putative
Q88P98	1051820000	7.07263e+08	9.38143e+08	5.70717e+08	7.03703e+08	9.18233e+08	PP_0954		8.22703e+08	0.140318	0.782171	1.84298	Lipopolysaccharide export system protein LptA
Q88P97	1.30878e+08	104156000	1.33267e+08	182910000	1.32997e+08	2.13627e+08	PP_0955		1.18711e+08	0.122611	0.907036	0.715534	Lipopolysaccharide export system protein LptC
Q88P96	56895000	0	0	0	0	0	PP_0956		1e-05	0	1.75762e-13	#DIV/0!	Phosphatase, YrbI family
Q88P95	6.22937e+08	6.68187e+08	6.85553e+08	8.11037e+08	530520000	7.86713e+08	PP_0957		6.7687e+08	0.0128287	1.08658	0.768075	Arabinose 5-phosphate isomerase
Q88P94	239720000	2.32917e+08	2.61223e+08	401640000	2.51687e+08	3.33347e+08	PP_0958		2.4707e+08	0.0572847	1.03066	0.596853	Toluene tolerance ABC efflux transporter, ATP-binding protein
Q88P92	2.39727e+07	0	0	0	0	0	PP_0960		1e-05	0	4.17142e-13	#DIV/0!	Toluene tolerance ABC transporter, periplasmic substrate-binding protein
Q88P91	1645533333	1764666667	1765066667	1385533333	1238966667	1417866667	PP_0961		1.76487e+09	0.000113323	1.07252	1.18765	Toluene-tolerance protein
Q88P90	0	0	0	0	0	3.37333e+07	PP_0962		1e-05	0	#DIV/0!	#DIV/0!	Toluene-tolerance protein
Q88P88	1724033333	1562500000	1567200000	1846133333	1840933333	1793066667	PP_0964		1.56485e+09	0.00150174	0.907668	0.933862	UDP-N-acetylglucosamine 1-carboxyvinyltransferase
Q88P87	324560000	3.56647e+08	3.90477e+08	4.76323e+08	3.29583e+08	4.51117e+08	PP_0965		3.73562e+08	0.0452803	1.15098	0.681386	ATP phosphoribosyltransferase
P59400	6.48993e+08	793570000	9.78057e+08	1533066667	2053266667	1659200000	PP_0966		8.85813e+08	0.104134	1.3649	0.42333	Histidinol dehydrogenase
Q88P86	4.13497e+08	566590000	5.48303e+08	1073903333	985260000	9.53413e+08	PP_0967		5.57447e+08	0.0164022	1.34813	0.385041	Histidinol-phosphate aminotransferase
Q88P82	1.54853e+08	72030000	158720000	8.62983e+07	4.62213e+07	9.26497e+07	PP_0971		1.15375e+08	0.375688	0.74506	1.7944	Uncharacterized protein
Q88P80	83706000	7.92017e+07	8.67103e+07	1.26017e+08	1.03773e+08	109720000	PP_0973		8.2956e+07	0.0452569	0.99104	0.664245	Nucleoid-associated protein PP_0973
Q88P78	761630000	4.63143e+08	1950433333	959640000	1010306667	833030000	PP_0975		1.20679e+09	0.616218	1.58448	0.793662	DNA-binding protein HU, form N
Q88P76	1872933333	3349033333	2702633333	4655066667	4186166667	3824500000	PP_0977		3.02583e+09	0.106814	1.61556	0.402343	Valine--tRNA ligase
Q88P75	192620000	183840000	1.52837e+08	0	46200000	1.40867e+08	PP_0978		1.68338e+08	0.0920864	0.87394	#DIV/0!	Uncharacterized protein
Q88P74	0	3257000	0	0	0	0	PP_0979		1.6285e+06	1	#DIV/0!	#DIV/0!	DNA polymerase III, chi subunit
Q88P73	1918033333	1450933333	1063006667	1030270000	8.82637e+08	9.21423e+08	PP_0980		1.25697e+09	0.15431	0.655343	1.86168	Probable cytosol aminopeptidase
Q88P71	175720000	146016000	1.53777e+08	99845000	8.76607e+07	143360000	PP_0982		1.49896e+08	0.0258868	0.853041	1.75993	Uncharacterized protein
Q88P70	8.35183e+07	4.96103e+07	84130000	5.67087e+07	4.62697e+07	8.05773e+07	PP_0983		6.68702e+07	0.25811	0.800665	1.47276	Uncharacterized protein
Q88P67	277500000	4.48707e+08	4.59787e+08	1008326667	704830000	876900000	PP_0986		4.54247e+08	0.012196	1.63692	0.275208	Aminomethyltransferase
Q88P65	6.91787e+07	533730000	4.04433e+08	2713500000	1264533333	1627233333	PP_0988		4.69082e+08	0.137819	6.78073	0.0254943	Glycine dehydrogenase (decarboxylating) 1
Q88P64	0	0	0	25003000	0	0	PP_0989		1e-05	0	#DIV/0!	0	Glycine cleavage system H protein 1
Q88P55	9.12293e+08	6.67057e+08	4.46217e+08	7.38983e+07	1.04244e+08	109790000	PP_0998		5.56637e+08	0.19837	0.610151	12.3452	Uncharacterized protein
Q88P54	770100000	828260000	274950000	3.58003e+07	4.59933e+07	3.45407e+07	PP_0999		5.51605e+08	0.501545	0.716277	21.511	Carbamate kinase
Q88P53	7123866667	8476633333	3516666667	7.89197e+08	1743300000	1221756667	PP_1000		5.99665e+09	0.413561	0.841769	9.02673	Ornithine carbamoyltransferase, catabolic
Q88P52	9410166667	14242000000	5002533333	1536166667	1759800000	1641233333	PP_1001		9.62227e+09	0.480109	1.02254	6.12575	Arginine deiminase
Q88P44	793740000	1633900000	1200466667	13632666667	16835000000	12081000000	PP_1009		1.41718e+09	0.152921	1.78545	0.0582234	Glyceraldehyde-3-phosphate dehydrogenase
Q88P43	1271266667	1734166667	2065366667	13854000000	8966600000	12137666667	PP_1010		1.89977e+09	0.0871686	1.49439	0.0917617	6-phosphogluconate dehydratase
Q88P42	180190000	189700000	2.00633e+08	1040106667	6.86157e+08	1008743333	PP_1011		1.95167e+08	0.0280102	1.08312	0.173242	Glucokinase
Q88P41	1.09853e+08	2.17403e+08	134870000	6.04597e+08	5.94797e+08	633700000	PP_1012		1.76137e+08	0.234288	1.60338	0.181697	DNA-binding response regulator GltR
Q88P40	0	0	0	0	0	1.00183e+07	PP_1013		1e-05	0	#DIV/0!	#DIV/0!	Sensor histidine kinase
Q88P39	0	0	4.41903e+07	6.08203e+08	2.09037e+08	4.03273e+08	PP_1014		2.20952e+07	1	#DIV/0!	0	Uncharacterized protein
Q88P38	13235000000	1876700000	13294333333	51843333333	48657000000	50057333333	PP_1015		7.58552e+09	0.752594	0.573141	0.255288	Sugar ABC transporter, periplasmic sugar-binding protein
Q88P37	2.28647e+07	90840000	1.20683e+08	721010000	6.57733e+08	642400000	PP_1016		1.05761e+08	0.141085	4.62554	0.031712	Sugar ABC transporter, permease protein
Q88P36	0	0	0	0	0	9.83333e+07	PP_1017		1e-05	0	#DIV/0!	#DIV/0!	Sugar ABC transporter, permease protein
Q88P35	6.59753e+08	2.42617e+08	9.34027e+08	8699066667	7391266667	7704233333	PP_1018		5.88322e+08	0.587612	0.89173	0.0758419	Sugar ABC transporter, ATP-binding subunit
Q88P34	0	0	0	416580000	7.45627e+07	7.06063e+07	PP_1019		1e-05	0	#DIV/0!	0	Porin B
Q88P33	0	0	0	3.05547e+08	2.40873e+08	324920000	PP_1020		1e-05	0	#DIV/0!	0	Uncharacterized protein
Q88P32	6.18563e+07	37540000	34537000	7.68233e+06	2.83207e+07	7.26267e+06	PP_1021		3.60385e+07	0.0416638	0.582616	8.05176	HTH-type transcriptional regulator HexR
Q88P31	1112700000	397700000	1340433333	5765933333	4766966667	5075333333	PP_1022		8.69067e+08	0.542383	0.781043	0.192978	Glucose-6-phosphate 1-dehydrogenase
Q88P30	1719200000	6.13297e+08	1968533333	10908700000	7428966667	8799600000	PP_1023		1.29091e+09	0.524913	0.750881	0.157599	6-phosphogluconolactonase
Q88P29	4.31393e+08	181310000	5.59057e+08	2515266667	2607900000	2348033333	PP_1024		3.70183e+08	0.510216	0.858111	0.17151	2-dehydro-3-deoxyphosphogluconate aldolase/4-hydroxy-2-oxoglutarate aldolase
Q88P28	31557666667	13742333333	12657333333	6746166667	6163233333	5156400000	PP_1025		1.31998e+10	0.041099	0.418277	4.67787	2-isopropylmalate synthase
Q88P26	5.06197e+07	90212000	84720000	119690000	1.24487e+08	9.35897e+07	PP_1027		8.7466e+07	0.0313951	1.72791	0.422923	Exodeoxyribonuclease 7 large subunit
Q88P22	3382166667	2259900000	2381066667	3691433333	2559400000	3031166667	PP_1031		2.32048e+09	0.0261081	0.686094	0.91622	Inosine-5'-monophosphate dehydrogenase
Q88P21	2253733333	1877566667	1931166667	3087966667	2252333333	2720100000	PP_1032		1.90437e+09	0.0140729	0.844983	0.729844	GMP synthase [glutamine-hydrolyzing]
Q88P16	4968833333	3325566667	4390133333	9227733333	7086766667	7677766667	PP_1037		3.85785e+09	0.137974	0.77641	0.538467	Phosphoribosylformylglycinamidine synthase
Q88NZ7	0	7.35357e+07	51272000	56484000	45824000	5.75637e+07	PP_1056		6.24038e+07	0.178384	#DIV/0!	0	Iron-chelator utilization protein, putative
Q88NZ6	0	0	0	0	0	1.47353e+07	PP_1057		1e-05	0	#DIV/0!	#DIV/0!	Transcriptional regulator, PadR family
Q88NZ3	8.82527e+07	231210000	1.44361e+08	1.48457e+08	8.85663e+07	1.40273e+08	PP_1060		1.87786e+08	0.231244	2.12782	0.594468	Glutamate synthase, large subunit, putative
Q88NZ1	0	0	0	0	0	9.36833e+06	PP_1062		1e-05	0	#DIV/0!	#DIV/0!	MutT/nudix family protein
Q88NZ0	32423000	5.81457e+07	57253000	6.47457e+07	5.15993e+07	4.73563e+07	PP_1063		5.76993e+07	0.0077355	1.77958	0.500775	Transcriptional activator MetR
Q88NY7	6.45033e+07	9.33743e+07	6.91247e+07	76862000	6.66993e+07	7.21147e+07	PP_1066		8.12495e+07	0.14923	1.25962	0.83921	Sigma-54 dependent response regulator
Q88NY5	372450000	6.32373e+08	5.36733e+08	232870000	2.73027e+08	3.08403e+08	PP_1068		5.84553e+08	0.0818061	1.56948	1.59939	Amino acid ABC transporter, ATP-binding protein
Q88NY3	0	0	0	7.95633e+06	0	0	PP_1070		1e-05	0	#DIV/0!	0	Amino acid ABC transporter, permease protein
Q88NY2	14280666667	14243333333	12157666667	4544200000	5019533333	4831700000	PP_1071		1.32005e+10	0.0789995	0.924362	3.14261	Amino acid ABC transporter, periplasmic amino acid-binding protein
Q88NX9	0	0	0	37060000	0	0	PP_1074		1e-05	0	#DIV/0!	0	Glycerol-3-phosphate regulon repressor
Q88NX8	9.61793e+07	5.76027e+08	112510000	1.47253e+08	4.95123e+08	123617000	PP_1075		3.44268e+08	0.673191	3.57944	0.653156	Glycerol kinase
Q88NX6	0	1.30917e+08	0	3.42687e+07	2.30063e+07	22576000	PP_1077		6.54583e+07	1	#DIV/0!	0	Cys-tRNA(Pro)/Cys-tRNA(Cys) deacylase
Q88NX5	75479000	131320000	9.80097e+07	2.75903e+08	5.09643e+08	2.63513e+08	PP_1078		1.14665e+08	0.145251	1.51916	0.27357	ABC transporter, ATP-binding protein, putative
Q88NX4	2.82867e+08	4.48533e+08	3.84833e+08	7.87257e+08	9.02123e+08	6.53377e+08	PP_1079		4.16683e+08	0.0764369	1.47307	0.359307	Ornithine carbamoyltransferase
Q88NX2	1423133333	1014310000	1489166667	2903066667	1575400000	2520833333	PP_1081		1.25174e+09	0.189679	0.879565	0.490217	Glutaredoxin
Q88NX1	0	0	0	898300	0	0	PP_1082		1e-05	0	#DIV/0!	0	Ferroxidase
Q88NW9	14018666667	19184333333	20505333333	21943000000	18271666667	19874000000	PP_1084		1.98448e+10	0.0332832	1.4156	0.638867	Antioxidant, AhpC/Tsa family
Q88NW8	0	0	1.64953e+06	0	0	0	PP_1085		824767	1	#DIV/0!	#DIV/0!	Ribonuclease T
Q88NW7	0	0	0	26684000	0	0	PP_1086		1e-05	0	#DIV/0!	0	Dihydroorotase
Q88NW6	3.57887e+08	2.82207e+08	1.43153e+08	172300000	8.44813e+07	122366000	PP_1087		2.1268e+08	0.326907	0.594266	2.07711	Outer membrane protein, OmpA family
P59604	9364333333	4766200000	8393366667	13761000000	10482333333	12885333333	PP_1088		6.57978e+09	0.27563	0.702643	0.680498	Argininosuccinate synthase
Q88NW2	0	0	3.92867e+06	0	0	0	PP_1092		1.96433e+06	1	#DIV/0!	#DIV/0!	Endonuclease III
Q88NV7	1588533333	2147500000	1840566667	2989266667	2755666667	2870566667	PP_1097		1.99403e+09	0.0769629	1.25527	0.531412	Methionine--tRNA ligase
Q88NV6	2.82427e+08	3.69857e+08	382320000	591000000	4.56787e+08	5.45817e+08	PP_1098		3.76088e+08	0.0165697	1.33163	0.477879	Iron-sulfur cluster carrier protein
Q88NV5	7389333333	12310666667	14850000000	24271333333	24318000000	22814666667	PP_1099		1.35803e+10	0.093493	1.83783	0.304447	Cold-shock domain family protein
Q88NV4	484160000	4.59083e+08	497220000	8.05723e+08	6.91053e+08	556810000	PP_1100		4.78152e+08	0.0398793	0.98759	0.600901	Deoxycytidine triphosphate deaminase
Q88NU6	2.31473e+08	2.94733e+08	1.46793e+08	2.26157e+08	2.45673e+08	1.76023e+08	PP_1108		2.20763e+08	0.335065	0.953731	1.02351	Acyl-homoserine lactone acylase QuiP
Q88NU4	0	0	0	0	0	1.10097e+07	PP_1110		1e-05	0	#DIV/0!	#DIV/0!	Serine acetyltransferase
Q88NU3	0	436980000	436750000	8.26753e+08	4.92677e+08	5.18827e+08	PP_1111		4.36865e+08	0.000263239	#DIV/0!	0	Synthetase, putative
Q88NU2	0	2.96603e+07	3.13733e+07	21218000	33722000	38983000	PP_1112		3.05168e+07	0.0280665	#DIV/0!	0	Uncharacterized protein
Q88NU1	37731000	8.34057e+08	735030000	1238496667	8.67567e+08	1013370000	PP_1113		7.84543e+08	0.063111	20.7931	0.0304652	Pyridoxal-phosphate dependent enzyme family protein
Q88NU0	0	0	0	0	0	1.14403e+06	PP_1114		1e-05	0	#DIV/0!	#DIV/0!	SEC-C domain protein
Q88NT4	0	4.17723e+07	1.01177e+07	1.35097e+07	1.43843e+07	0	PP_1120		2.5945e+07	0.610034	#DIV/0!	0	Uncharacterized protein
Q88NT3	3083733333	1507400000	1310533333	5.70933e+08	7.64633e+08	5.10257e+08	PP_1121		1.40897e+09	0.0698621	0.456903	5.40121	OmpA family protein
Q88NT2	3.87813e+08	241410000	194210000	8.35423e+07	44294000	5.16043e+07	PP_1122		2.1781e+08	0.108351	0.561636	4.64212	OmpA family protein
Q88NS9	3.04447e+07	34877000	3.67603e+07	3.99227e+07	4.47007e+07	6.46363e+07	PP_1125		3.58187e+07	0.0262898	1.17652	0.762591	Helicase, putative
Q88NS8	0	0	0	0	0	4.75467e+06	PP_1126		1e-05	0	#DIV/0!	#DIV/0!	Hydrolase, putative
Q88NS7	44951000	2.48003e+07	7.75853e+07	36980000	119180000	9.10243e+07	PP_1127		5.11928e+07	0.515551	1.13886	1.21555	Carboxylesterase
Q88NS6	59518000	1.30006e+08	2.97503e+08	2.52007e+08	193800000	252930000	PP_1128		2.13755e+08	0.391797	3.59143	0.236176	OmpA family protein
Q88NS5	4.28257e+08	344000000	5.15773e+08	3.09957e+08	317940000	2.86777e+08	PP_1129		4.29887e+08	0.199789	1.00381	1.38167	Pyridoxine/pyridoxamine 5'-phosphate oxidase
Q88NS3	2.60057e+08	1.13535e+08	2.28797e+08	2.99297e+08	1.47767e+08	2.52193e+08	PP_1131		1.71166e+08	0.336697	0.658186	0.868893	Outer membrane lipoprotein, putative
Q88NS1	3.02317e+08	2.76673e+08	277530000	339690000	4.85487e+08	4.05613e+08	PP_1134		2.77102e+08	0.00154576	0.916594	0.889978	Uncharacterized protein
Q88NS0	1.15043e+08	1.23731e+08	206340000	2.09253e+08	1.64803e+08	199540000	PP_1135		1.65036e+08	0.250275	1.43455	0.54978	Uncharacterized protein
Q88NR9	11410000	2.23803e+07	1.47457e+08	8.99167e+06	2.31463e+07	2.82813e+07	PP_1136		8.49185e+07	0.736449	7.44246	1.26895	Uncharacterized protein
Q88NR8	5.25213e+08	1181400000	548030000	564100000	7.48937e+08	541000000	PP_1137		8.64715e+08	0.36623	1.64641	0.931064	High-affinity branched-chain amino acid transport ATP-binding protein
Q88NR7	666090000	1322433333	4.89783e+08	506630000	5.85833e+08	3.78323e+08	PP_1138		9.06108e+08	0.459465	1.36034	1.31475	Branched-chain amino acid ABC transporter, ATP-binding protein
Q88NR6	1.20173e+08	674010000	1.63517e+08	9.98367e+07	1.55267e+08	88490000	PP_1139		4.18763e+08	0.609525	3.48468	1.20369	Branched-chain amino acid ABC transporter, permease protein
Q88NR4	37839333333	61618000000	29638000000	10537000000	18804333333	10597666667	PP_1141		4.5628e+10	0.350443	1.20584	3.59109	Branched-chain amino acid ABC transporter, periplasmic amino acid-binding protein
Q88NR2	1.31177e+08	4.53863e+08	151580000	2.42003e+08	287740000	1.98427e+08	PP_1143		3.02722e+08	0.499276	2.30774	0.542045	3-hydroxyisobutyrate dehydrogenase family protein
Q88NR0	308980000	1.97087e+08	2.63213e+08	5.08317e+08	305290000	443980000	PP_1145		2.3015e+08	0.14366	0.74487	0.607849	RNA polymerase-associated protein RapA
Q88NQ9	285420000	1.66373e+08	1.62583e+08	99801000	1.55833e+08	139570000	PP_1146		1.64478e+08	0.0115213	0.576268	2.85989	Uncharacterized protein
Q877U6	1486100000	1290200000	1890666667	2424600000	2155766667	2853866667	PP_1157		1.59043e+09	0.188775	1.07021	0.612926	Acetolactate synthase, catabolic, putative
Q88NN8	8.69667e+06	0	0	0	0	0	PP_1169		1e-05	0	1.14987e-12	#DIV/0!	TRAP dicarboxylate transporter, DctP subunit
Q88NN6	0	0	0	0	1.32853e+06	0	PP_1171		1e-05	0	#DIV/0!	#DIV/0!	Uronate dehydrogenase
Q88NN0	1053510000	1682066667	1668733333	1956066667	1994033333	2118200000	PP_1177		1.6754e+09	0.00397915	1.5903	0.538586	Ribonucleoside-diphosphate reductase subunit beta
Q88NM8	3058533333	3432266667	4107600000	6014100000	3893433333	5447333333	PP_1179		3.76993e+09	0.0895683	1.2326	0.50856	Ribonucleoside-diphosphate reductase
Q88NM3	5.81357e+08	399930000	4.30707e+08	1.83343e+08	1.96497e+08	228670000	PP_1184		4.15318e+08	0.0370519	0.714395	3.17086	Dienelactone hydrolase family protein
Q88NM2	0	0	0	49797000	7.16977e+07	5.18537e+07	PP_1185		1e-05	0	#DIV/0!	0	Outer membrane protein H1
Q88NM1	3.43287e+07	53105000	1.65957e+07	1.01122e+08	1.89043e+08	157994000	PP_1186		3.48503e+07	0.523802	1.0152	0.339479	Transcriptional regulatory protein PhoP
Q88NL9	7.48673e+07	32398000	2.83217e+07	0	0	0	PP_1188		3.03598e+07	0.0671337	0.405515	#DIV/0!	C4-dicarboxylate transport protein
Q88NL7	1.77697e+08	210090000	1.28457e+08	2.97597e+08	2.15307e+08	2.15873e+08	PP_1190		1.69273e+08	0.241129	0.952597	0.597106	Uncharacterized protein
Q88NL6	0	0	2.24363e+07	85975000	0	0	PP_1191		1.12182e+07	1	#DIV/0!	0	S4 domain protein
Q88NL0	2.78567e+08	4.36603e+08	3.55227e+08	5.48937e+08	744150000	5.78637e+08	PP_1197		3.95915e+08	0.10277	1.42126	0.507466	Ribosomal protein S12 methylthiotransferase RimO
Q88NK9	8.58747e+07	71379000	5.82457e+07	49727000	4.47697e+07	3.16343e+07	PP_1198		6.48123e+07	0.101318	0.754732	1.72692	Transcriptional regulator, Cro/CI family
Q88NK8	2.17187e+07	0	0	0	0	0	PP_1199		1e-05	0	4.60433e-13	#DIV/0!	Uncharacterized protein
Q88NK6	1.97558e+08	6.41657e+07	7.81863e+07	61343000	1.72447e+07	3.49003e+07	PP_1201		7.1176e+07	0.0984929	0.360278	3.22055	Uncharacterized protein
Q88NK3	2.77413e+07	44178000	4.57307e+07	1.33252e+08	9.99383e+07	9.73873e+07	PP_1204		4.49543e+07	0.0172694	1.62048	0.208186	Lipoprotein, putative
Q88NK2	3756600000	5523433333	4671366667	7964500000	8782900000	6934866667	PP_1205		5.0974e+09	0.0835786	1.35692	0.471668	Proline--tRNA ligase
Q88NK1	0	0	0	0	0	2209400	PP_1206		1e-05	0	#DIV/0!	#DIV/0!	Porin D
Q88NK0	3.23097e+07	53553000	5.02473e+07	92897000	9.22097e+07	1.11358e+08	PP_1207		5.19002e+07	0.0318464	1.60634	0.347801	Uncharacterized protein
Q88NJ8	243810000	256890000	274760000	176230000	2.43277e+08	2.48787e+08	PP_1209		2.65825e+08	0.0336123	1.0903	1.38348	Cold-shock domain family protein
Q88NJ7	1173800000	1064123333	698230000	327100000	4.44457e+08	275360000	PP_1210		8.81177e+08	0.207616	0.750704	3.58851	DNA-binding stress protein, putative
Q88NJ5	57626000	106539000	1.0917e+08	2.42897e+08	1.37907e+08	1.93783e+08	PP_1212		1.07854e+08	0.0121955	1.87163	0.237245	Conserved domain protein
Q88NJ4	4055466667	5613866667	4607233333	6829600000	6465933333	6117866667	PP_1213		5.11055e+09	0.0984858	1.26016	0.593807	Aspartate--tRNA(Asp/Asn) ligase
Q88NJ3	1.79837e+08	265440000	219790000	269400000	3.22403e+08	2.72523e+08	PP_1214		2.42615e+08	0.0940791	1.34909	0.667545	Probable transcriptional regulatory protein PP_1214
Q88NJ1	93570000	1.04973e+08	9.95133e+07	1.85353e+08	2.36613e+08	1.73257e+08	PP_1216		1.02243e+08	0.026701	1.09269	0.50482	Holliday junction ATP-dependent DNA helicase RuvA
Q88NJ0	9.05027e+07	1.66597e+08	8.43463e+07	70880000	81040000	7.37817e+07	PP_1217		1.25472e+08	0.327765	1.38638	1.27684	Holliday junction ATP-dependent DNA helicase RuvB
Q88NI9	6.91583e+07	8.30083e+07	5.38357e+07	5.37033e+07	7.72777e+07	72116000	PP_1218		6.8422e+07	0.213182	0.989353	1.28778	Uncharacterized protein
Q88NI8	8.34287e+07	1.09466e+08	102615000	237860000	220300000	1.89417e+08	PP_1219		1.06041e+08	0.0323052	1.27103	0.350747	Biopolymer transport protein TolQ
Q88NI7	114404000	136320000	1.22091e+08	2.20167e+08	155050000	1.76493e+08	PP_1220		1.29206e+08	0.0550621	1.12938	0.519625	Biopolymer transport protein TolR
Q88NI6	1.37647e+07	22983000	9.29633e+06	18344000	3.00047e+07	2.93487e+07	PP_1221		1.61397e+07	0.424007	1.17254	0.750363	Biopolymer transport protein TolA
P0A173	1173706667	1950466667	2455133333	2697100000	2296066667	2815533333	PP_1222		2.2028e+09	0.114551	1.87679	0.435174	Protein TolB
P0A138	6945200000	6720933333	6684933333	12214333333	10745533333	9607100000	PP_1223		6.70293e+09	0.00268539	0.965117	0.568611	Peptidoglycan-associated lipoprotein
P0A130	4.28603e+08	6.04497e+08	6.01087e+08	8.42757e+08	6.79667e+08	7.13197e+08	PP_1224		6.02792e+08	0.00282851	1.40641	0.508573	Uncharacterized protein PP_1224
Q88NI3	416630000	1.26444e+08	1.54413e+08	237280000	2.38057e+08	219770000	PP_1226		1.40429e+08	0.0995842	0.337059	1.75586	HlyD family secretion protein
Q88NI1	0	0	0	18665000	0	0	PP_1228		1e-05	0	#DIV/0!	0	Methyl-accepting chemotaxis transducer
Q88NH9	1.71457e+08	212050000	2.05803e+08	3.91343e+08	1.53327e+08	3.12227e+08	PP_1230		2.08927e+08	0.0149494	1.21854	0.438123	Uncharacterized protein
Q88NH8	1.32447e+07	30372000	4.00963e+07	8.53017e+07	8.27983e+07	73689000	PP_1231		3.52342e+07	0.137996	2.66025	0.155269	Quinolinate synthase A
Q88NH7	7.43877e+08	9.14623e+08	6.01293e+08	3.39847e+08	254890000	324040000	PP_1232		7.57958e+08	0.206693	1.01893	2.18886	Putative beta-barrel assembly-enhancing protease
Q88NH4	6.73783e+08	645420000	6.37867e+08	646990000	6.48727e+08	7.09217e+08	PP_1235		6.41643e+08	0.00588593	0.952299	1.04141	AhpC/TSA family protein
Q88NH3	0	0	0	0	0	2.80017e+07	PP_1236		1e-05	0	#DIV/0!	#DIV/0!	Glycine cleavage system transcriptional repressor, putative
Q88NH2	1947800000	1736166667	1775900000	2731500000	2661733333	2592166667	PP_1237		1.75603e+09	0.0113134	0.901547	0.713088	4-hydroxy-tetrahydrodipicolinate synthase
Q88NH1	1251300000	1006446667	1171566667	1718833333	1291566667	1340900000	PP_1238		1.08901e+09	0.0758122	0.8703	0.727994	Lipoprotein, putative
Q88NG9	1298866667	1180933333	1505200000	2185633333	2216500000	2001900000	PP_1240		1.34307e+09	0.120719	1.03403	0.594275	Phosphoribosylaminoimidazole-succinocarboxamide synthase
Q88NG4	1.56447e+08	2.93493e+08	2.96047e+08	1175866667	812360000	1211333333	PP_1245		2.9477e+08	0.00433106	1.88416	0.133048	Uncharacterized protein
Q88NG3	7.88853e+08	1028386667	1247333333	3709833333	2319466667	2999233333	PP_1246		1.13786e+09	0.0962098	1.44242	0.212638	Conserved domain protein
Q88NG0	0	0	0	0	0	5739000	PP_1249		1e-05	0	#DIV/0!	#DIV/0!	Lipoprotein, putative
Q88NF9	0	0	0	1.19753e+07	0	0	PP_1251		1e-05	0	#DIV/0!	0	Probable malate:quinone oxidoreductase 2
Q88NF8	0	0	0	0	0	3.21207e+08	PP_1253		1e-05	0	#DIV/0!	#DIV/0!	Transcriptional regulator, ArsR family
Q88NF7	5.24963e+07	1.12587e+08	73938000	1.15587e+08	9.98823e+07	1.00051e+08	PP_1254		9.32623e+07	0.207204	1.77655	0.454173	Xenobiotic reductase A
Q88NF1	2.97017e+08	190400000	156930000	3.24097e+08	195870000	2.33933e+08	PP_1261		1.73665e+08	0.0963637	0.584698	0.916445	D-isomer specific 2-hydroxyacid dehydrogenase family protein
Q88ND8	0	0	0	0	0	7.29033e+06	PP_1274		1e-05	0	#DIV/0!	#DIV/0!	Oxidoreductase, short-chain dehydrogenase/reductase family
Q88ND7	0	0	3.98067e+06	0	0	0	PP_1275		1.99033e+06	1	#DIV/0!	#DIV/0!	Uncharacterized protein
Q88ND5	1.37333e+08	1.30607e+08	4.18297e+08	1.88537e+08	176940000	182660000	PP_1277		2.74452e+08	0.524118	1.99843	0.728417	Alginate biosynthesis protein AlgA
Q88ND4	0	4.33033e+06	2504933333	0	0	3.61603e+07	PP_1278		1.25463e+09	0.996549	#DIV/0!	#DIV/0!	Alginate biosynthesis protein AlgF
Q88ND3	0	0	1.7483e+08	0	0	0	PP_1279		8.74148e+07	1	#DIV/0!	#DIV/0!	Probable alginate O-acetylase AlgJ
Q88ND1	8.79567e+07	0	1.60743e+08	1.08407e+08	90440000	1.42757e+08	PP_1281		8.03717e+07	1	0.913764	0.811358	Alginate lyase
Q88NC9	0	0	200583000	0	0	0	PP_1283		1.00292e+08	1	#DIV/0!	#DIV/0!	Poly(beta-D-mannuronate) C5 epimerase
Q88NC7	79813000	5.88237e+07	1001676667	0	2.15937e+07	0	PP_1285		5.3025e+08	0.889064	6.64366	#DIV/0!	Alginate biosynthesis protein AlgK
Q88NC6	41118000	51063000	4.77473e+08	65417000	8.91357e+07	8.79817e+07	PP_1286		2.64268e+08	0.806776	6.42707	0.628552	Alginate biosynthesis protein Alg44
Q88NC4	4.07637e+06	7.62253e+06	3558623333	6.81607e+06	1.07345e+07	1.04067e+07	PP_1288		1.78312e+09	0.995725	437.429	0.598053	GDP-mannose 6-dehydrogenase
Q88NC3	6.70483e+07	141040000	131952000	188020000	1.30487e+08	1.36078e+08	PP_1289		1.36496e+08	0.0332904	2.03579	0.356602	UPF0246 protein PP_1289
Q88NC1	1.99653e+08	2.85563e+08	1.90483e+08	3.47187e+08	2.53377e+08	2.59847e+08	PP_1291		2.38023e+08	0.199728	1.19218	0.57506	PhoH family protein
Q88NC0	132199000	1.17564e+08	78105000	1.28142e+08	87146000	8.02293e+07	PP_1292		9.78343e+07	0.201661	0.740054	1.03166	Cyclic pyranopterin monophosphate synthase accessory protein
Q88NB9	76969000	45003000	4.31437e+07	1.20793e+07	2.35697e+07	28714000	PP_1293		4.40733e+07	0.0210936	0.572611	6.37196	Molybdopterin synthase sulfur carrier subunit
Q88NB8	7451000	0	0	0	0	0	PP_1294		1e-05	0	1.3421e-12	#DIV/0!	Molybdenum cofactor biosynthesis protein E
Q88NB7	23952000	0	0	0	0	0	PP_1295		1e-05	0	4.17502e-13	#DIV/0!	ATP-dependent RNA helicase RhlB
Q88NB6	1.2537e+08	3.90713e+08	1.51297e+08	1.33637e+08	277090000	9.64353e+07	PP_1296		2.71005e+08	0.44172	2.16165	0.938134	Carboxylesterase
Q88NB4	0	5.43557e+07	0	0	0	0	PP_1298		2.71778e+07	1	#DIV/0!	#DIV/0!	General amino acid ABC transporter, permease protein
Q88NB2	0	1.55117e+08	0	0	0	0	PP_1300		7.75583e+07	1	#DIV/0!	#DIV/0!	Amino acid ABC transporter, ATP-binding protein
Q88NB1	1.44913e+08	96140000	8.21983e+07	2.02067e+08	79459000	1.39643e+08	PP_1301		8.91692e+07	0.0781754	0.615328	0.717156	HtrA-like protease AlgW
Q88NA9	9.00263e+08	964190000	9.71747e+08	1940900000	1762800000	1931233333	PP_1303		9.67968e+08	0.00390336	1.07521	0.463838	Sulfate adenylyltransferase subunit 2
Q88NA8	1552200000	2080466667	2022800000	5599200000	4293600000	4784933333	PP_1304		2.05163e+09	0.0140538	1.32176	0.277218	Sulfate adenylyltransferase subunit 1
Q88NA7	0	0	0	0	0	4.72167e+06	PP_1305		1e-05	0	#DIV/0!	#DIV/0!	Pyocin S-type immunity protein, putative
Q88NA3	1473933333	1598000000	1302466667	9.40177e+08	1123166667	7.63247e+08	PP_1309		1.45023e+09	0.101892	0.983921	1.56772	Uncharacterized protein
Q88NA2	0	0	0	10558000	0	0	PP_1310		1e-05	0	#DIV/0!	0	Uncharacterized protein
Q88NA1	8.58427e+08	1004073333	8.12513e+08	1579100000	1628933333	1280933333	PP_1311		9.08293e+08	0.105451	1.05809	0.543618	Tryptophan--tRNA ligase
Q88NA0	130820000	1.76307e+08	1.45603e+08	2.97187e+08	3.23573e+08	3.27723e+08	PP_1312		1.60955e+08	0.0953786	1.23035	0.440195	Cell division protein ZapE
Q88N99	1.1161e+08	1.74297e+08	1.28567e+08	166340000	1.99367e+08	1.43327e+08	PP_1313		1.51432e+08	0.15099	1.3568	0.670973	Transcriptional regulator, AraC family
Q88N98	305270000	7.53983e+08	2.66553e+08	161690000	207050000	1.26411e+08	PP_1314		5.10268e+08	0.477621	1.67153	1.888	Oxidoreductase, aldo/keto reductase family
Q88N97	6036066667	6549200000	8610866667	6580100000	8583533333	8779100000	PP_1315		7.58003e+09	0.135993	1.25579	0.917321	50S ribosomal protein L13
Q88N96	3218900000	4075666667	4646833333	5320900000	7445566667	6563066667	PP_1316		4.36125e+09	0.065482	1.35489	0.604954	30S ribosomal protein S9
Q88N95	1275466667	987140000	7.15777e+08	519010000	2.77173e+08	378610000	PP_1317		8.51458e+08	0.159352	0.667566	2.4575	Ubiquinol-cytochrome c reductase iron-sulfur subunit
Q88N94	0	0	0	0	0	1.75583e+06	PP_1318		1e-05	0	#DIV/0!	#DIV/0!	Cytochrome b
Q88N93	1466133333	1112346667	991400000	4.39767e+08	316150000	457780000	PP_1319		1.05187e+09	0.0574911	0.717447	3.33389	Ubiquinol--cytochrome c reductase, cytochrome c1
Q88N92	1.88393e+08	2.03573e+08	1.84347e+08	1.85357e+08	194840000	2.19107e+08	PP_1320		1.9396e+08	0.0495635	1.02955	1.01638	Stringent starvation protein A
Q88N91	0	0	0	0	0	1.24447e+07	PP_1321		1e-05	0	#DIV/0!	#DIV/0!	Stringent starvation protein B
Q88N90	6.01107e+08	583600000	8.53697e+08	880000000	4.95063e+08	7.06397e+08	PP_1322		7.18648e+08	0.18792	1.19554	0.683076	Lipoprotein, putative
Q88N89	0	0	0	3.47133e+06	0	0	PP_1323		1e-05	0	#DIV/0!	0	Phosphoheptose isomerase
Q88N87	1.87747e+08	1.86497e+08	1.92537e+08	3.13123e+08	146930000	221320000	PP_1325		1.89517e+08	0.0159353	1.00943	0.599593	Lipoprotein, putative
Q88N86	0	0	0	22834000	0	0	PP_1326		1e-05	0	#DIV/0!	0	Ribosomal RNA small subunit methyltransferase I
Q88N85	0	0	0	0	3.80267e+06	0	PP_1328		1e-05	0	#DIV/0!	#DIV/0!	Transcriptional regulator MraZ
Q88N84	2.80697e+08	2.58243e+08	3.08913e+08	3.89017e+08	2.62007e+08	3.31743e+08	PP_1329		2.83578e+08	0.0893404	1.01027	0.721554	Ribosomal RNA small subunit methyltransferase H
Q88N82	102028000	8.21133e+07	6.21763e+07	1.11293e+08	1.09662e+08	106910000	PP_1331		7.21448e+07	0.138173	0.707108	0.916749	Penicillin-binding protein 3
Q88N81	1794866667	1512666667	1225166667	1136833333	1136300000	965190000	PP_1332		1.36892e+09	0.10501	0.762684	1.57883	UDP-N-acetylmuramoyl-L-alanyl-D-glutamate--2,6-diaminopimelate ligase
Q88N80	8.65267e+08	707410000	5.34943e+08	603120000	5.89933e+08	5.08413e+08	PP_1333		6.21177e+08	0.138823	0.717902	1.43465	UDP-N-acetylmuramoyl-tripeptide--D-alanyl-D-alanine ligase
Q88N79	0	0	0	0	903700	0	PP_1334		1e-05	0	#DIV/0!	#DIV/0!	Phospho-N-acetylmuramoyl-pentapeptide-transferase
Q88N78	2.48187e+08	1.73777e+08	1.46483e+08	178760000	1.68083e+08	154360000	PP_1335		1.6013e+08	0.0852224	0.6452	1.38838	UDP-N-acetylmuramoylalanine--D-glutamate ligase
Q88N76	264330000	1.73943e+08	1.37557e+08	127406000	1.42853e+08	1.25167e+08	PP_1337		1.5575e+08	0.116811	0.589226	2.07471	UDP-N-acetylglucosamine--N-acetylmuramyl-(pentapeptide) pyrophosphoryl-undecaprenol N-acetylglucosamine transferase
Q88N75	5.61883e+08	6.10427e+08	496310000	703510000	7.18203e+08	587810000	PP_1338		5.53368e+08	0.103111	0.984846	0.798686	UDP-N-acetylmuramate--L-alanine ligase
Q88N74	1.32027e+08	9.08167e+07	39730000	4.45133e+07	59100000	1.68927e+08	PP_1339		6.52733e+07	0.391329	0.494393	2.96602	D-alanine--D-alanine ligase B
Q88N72	1786300000	1503433333	1529166667	1517300000	1505766667	1508033333	PP_1341		1.5163e+09	0.00848557	0.84885	1.17729	Cell division protein FtsA
Q59692	2787566667	3873033333	3252700000	5717966667	5321333333	4495600000	PP_1342		3.56287e+09	0.0870554	1.27813	0.48751	Cell division protein FtsZ
Q88N71	1613766667	1359800000	1371033333	1100566667	1601466667	1332633333	PP_1343		1.36542e+09	0.00411352	0.846105	1.46631	UDP-3-O-acyl-N-acetylglucosamine deacetylase
Q88N69	1408866667	1275233333	1580033333	2044466667	1862566667	2017766667	PP_1345		1.42763e+09	0.10675	1.01332	0.689112	Protein translocase subunit SecA
P59612	5.53583e+08	6.35847e+08	875390000	1465100000	1114263333	1356400000	PP_1346		7.55618e+08	0.158508	1.36496	0.377847	Arginine biosynthesis bifunctional protein ArgJ
Q88N68	1.87323e+08	117940000	1.92467e+08	1.33647e+08	101728000	1.2077e+08	PP_1347		1.55203e+08	0.240094	0.828532	1.40163	Glutathione S-transferase family protein
Q88N67	2.03613e+08	256050000	306860000	4.80267e+08	3.25953e+08	4.08523e+08	PP_1348		2.81455e+08	0.0902631	1.3823	0.423959	MutT/nudix family protein/thiamine-phosphate pyrophosphorylase, putative
P59560	1205033333	1129766667	1452286667	8.55457e+08	8.58733e+08	9.86813e+08	PP_1352		1.29103e+09	0.124908	1.07136	1.40864	UPF0234 protein PP_1352
Q88N63	98654000	97925000	2.79673e+08	174156000	116670000	213750000	PP_1353		1.88799e+08	0.481327	1.91375	0.566469	Uncharacterized protein
Q88N58	3.94983e+08	6.96383e+08	3.76517e+08	2.75643e+08	435160000	2.71847e+08	PP_1358		5.3645e+08	0.298133	1.35816	1.43295	Uncharacterized protein
Q88N56	5649533333	9068100000	9867000000	10317600000	7164233333	10700166667	PP_1360		9.46755e+09	0.0421915	1.67581	0.547563	10 kDa chaperonin
Q88N55	26365666667	38687000000	41054000000	65004666667	53633666667	61848666667	PP_1361		3.98705e+10	0.0296836	1.51221	0.405597	60 kDa chaperonin
Q88N54	1674166667	1484366667	1596366667	3145500000	2501133333	2807433333	PP_1362		1.54037e+09	0.036355	0.92008	0.532242	Pyruvate kinase
Q88N50	8181000000	8042800000	8144866667	8952633333	8079866667	8357300000	PP_1366		8.09383e+09	0.00630521	0.989345	0.913809	Transcriptional regulator MvaT, P16 subunit
Q88N49	2.64253e+08	142680000	189810000	195810000	221670000	2.31577e+08	PP_1367		1.66245e+08	0.141749	0.629112	1.34954	Formyltetrahydrofolate deformylase
Q88N45	751630000	6.93363e+08	326860000	799770000	463520000	641660000	PP_1371		5.10112e+08	0.359238	0.678674	0.939808	Methyl-accepting chemotaxis transducer
Q88N44	8.28177e+08	889060000	521900000	2.42247e+08	394670000	2.83193e+08	PP_1372		7.0548e+08	0.26022	0.851847	3.41873	Uncharacterized protein
Q88N43	1.68063e+08	142730000	1.74707e+08	332340000	284720000	3.53327e+08	PP_1373		1.58718e+08	0.100734	0.944396	0.505697	Low-affinity inorganic phosphate transporter
Q88N42	0	0	0	0	0	41930000	PP_1374		1e-05	0	#DIV/0!	#DIV/0!	Conserved domain protein
Q88N41	3.22603e+06	0	0	0	0	0	PP_1375		1e-05	0	3.09978e-12	#DIV/0!	Pca regulon regulatory protein
Q88N39	4.43483e+08	1.58703e+08	1.81577e+08	229900000	1.71617e+08	6.75167e+07	PP_1377		1.7014e+08	0.0672192	0.383645	1.92903	Beta-ketoadipyl CoA thiolase PhaD
Q88N37	381700000	4.70967e+08	4.68337e+08	514930000	4.61113e+08	4.30173e+08	PP_1379		4.69652e+08	0.00279995	1.23042	0.741266	3-carboxy-cis,cis-muconate cycloisomerase
Q88N36	3.02837e+08	350500000	2.83727e+08	122259000	152643000	116860000	PP_1380		3.17113e+08	0.105283	1.04714	2.47701	3-oxoadipate enol-lactone hydrolase
Q88N35	9.74237e+07	3.68243e+07	4.15217e+07	6.93233e+06	8087000	9.79233e+06	PP_1381		3.9173e+07	0.0599563	0.402089	14.0535	4-carboxymuconolactone decarboxylase
Q88N32	0	2.46477e+07	0	0	0	0	PP_1384		1.23238e+07	1	#DIV/0!	#DIV/0!	Probable efflux pump outer membrane protein TtgC
Q88N31	1.77067e+08	201450000	2.69643e+08	334970000	2.69757e+08	3.40753e+08	PP_1385		2.35547e+08	0.144755	1.33027	0.528605	Probable efflux pump membrane transporter TtgB
Q88N30	4.57113e+08	510640000	4.33453e+08	6.26233e+08	752150000	6.29133e+08	PP_1386		4.72047e+08	0.0817575	1.03267	0.729941	Probable efflux pump periplasmic linker TtgA
Q88N27	3.33247e+08	379540000	3.58903e+08	5.18857e+08	5.50333e+08	4.13887e+08	PP_1389		3.69222e+08	0.0279462	1.10795	0.642271	Oxaloacetate decarboxylase
Q88N19	0	0	0	0	0	1.53963e+07	PP_1397		1e-05	0	#DIV/0!	#DIV/0!	Uncharacterized protein
Q88N18	0	0	0	51060000	0	0	PP_1398		1e-05	0	#DIV/0!	0	Uncharacterized protein
Q88N16	0	0	0	0	0	4.18067e+06	PP_1400		1e-05	0	#DIV/0!	#DIV/0!	Dicarboxylate MFS transporter
Q88N15	0	1.00913e+07	0	0	0	0	PP_1401		5.04567e+06	1	#DIV/0!	#DIV/0!	C4-dicarboxylate transport transcriptional regulatory protein
Q88N13	115691000	1.11264e+08	119127000	2.09003e+08	1.77667e+08	220740000	PP_1403		1.15195e+08	0.0341304	0.995716	0.553537	Periplasmic beta-glucosidase
Q88N06	214980000	5.39957e+07	1.17208e+08	4.74757e+07	25048000	35789000	PP_1412		8.56017e+07	0.369222	0.398184	4.52821	Enoyl-CoA hydratase/isomerase family protein
Q88N05	96254000	2.75177e+08	1.03088e+08	9.33323e+07	1.45387e+08	112480000	PP_1413		1.89132e+08	0.454944	1.96493	1.0313	Uracil-DNA glycosylase
Q88MZ8	63072000	2.29457e+07	1.04133e+07	0	18082000	0	PP_1420		1.66795e+07	0.375681	0.264452	#DIV/0!	Transcriptional regulatory protein TctD
Q88MZ5	4.40847e+08	4.57743e+08	504610000	7.21233e+08	486570000	5.77507e+08	PP_1423		4.81177e+08	0.0487001	1.09148	0.61124	tRNA-modifying protein YgfZ
Q88MZ4	0	0	0	0	0	2.01343e+07	PP_1424		1e-05	0	#DIV/0!	#DIV/0!	Uncharacterized protein PP_1424
Q88MZ2	325350000	636930000	4.42783e+08	4.87187e+08	459510000	4.44617e+08	PP_1426		5.39857e+08	0.179813	1.65931	0.667814	L-aspartate oxidase
Q88MZ1	2.07703e+08	2.40857e+08	3.34473e+08	2.67377e+08	138030000	1.91947e+08	PP_1427		2.87665e+08	0.162718	1.38498	0.776819	RNA polymerase sigma factor
Q88MZ0	2.04777e+07	0	0	0	0	0	PP_1428		1e-05	0	4.88337e-13	#DIV/0!	Sigma factor algU negative regulatory protein MucA
Q88MY9	1.20903e+08	9.88767e+07	2.23363e+08	8.18253e+07	7.19423e+07	8.20267e+07	PP_1429		1.6112e+08	0.386317	1.33263	1.47758	Sigma factor algU regulatory protein AlgN
Q88MY8	1102333333	2441866667	1418400000	1063400000	1227233333	1176366667	PP_1430		1.93013e+09	0.265128	1.75095	1.03661	Alginate biosynthesis negative regulator, serine protease AlgY
Q88MY7	5.58673e+08	523090000	6.31587e+08	9.61287e+08	920270000	9.77293e+08	PP_1431		5.77338e+08	0.0939628	1.03341	0.581172	Elongation factor 4
Q88MY6	2.96807e+07	1.32807e+08	7.95997e+07	137000000	7.24233e+07	1.47263e+08	PP_1432		1.06203e+08	0.250496	3.57819	0.216647	Signal peptidase I
Q88MY5	9.39197e+07	1.03984e+08	101666000	1.75213e+08	1.54993e+08	143510000	PP_1433		1.02825e+08	0.01127	1.09482	0.53603	Ribonuclease 3
Q88MY4	1.91777e+08	2.15973e+08	2.17113e+08	2.73443e+08	2.83383e+08	2.89913e+08	PP_1434		2.16543e+08	0.00263227	1.12914	0.70134	GTPase Era
Q88MX5	4.98633e+08	4.79323e+08	6.31947e+08	9.87597e+08	559120000	8.09537e+08	PP_1443		5.55635e+08	0.137341	1.11432	0.504896	Lon protease
Q88MX4	7.73537e+08	4.76253e+08	5.11473e+08	372600000	3.24977e+08	3.90097e+08	PP_1444		4.93863e+08	0.0356576	0.638449	2.07605	Glucose dehydrogenase (Pyrroloquinoline-quinone)
Q88MW7	0	0	0	0	0	3560000	PP_1451		1e-05	0	#DIV/0!	#DIV/0!	Uncharacterized protein
Q88MW5	0	0	0	0	11661000	0	PP_1453		1e-05	0	#DIV/0!	#DIV/0!	MutT/nudix family protein
Q88MW1	1279666667	9.85637e+08	1413733333	2213666667	1412466667	1928433333	PP_1457		1.19968e+09	0.17842	0.937498	0.578076	Phosphoribosylglycinamide formyltransferase 2
Q88MW0	7.40537e+07	86230000	72158000	1.04056e+08	3.95923e+07	8.21797e+07	PP_1458		7.9194e+07	0.0888451	1.06941	0.711674	Metabolite-proton symporter
Q88MV9	94691000	84775000	8.05503e+07	27860000	40460000	95981000	PP_1459		8.26627e+07	0.0255537	0.872973	3.39882	CBS domain protein
Q88MV7	8.56087e+08	964100000	839160000	1662700000	1085700000	1326733333	PP_1461		9.0163e+08	0.0692856	1.0532	0.514877	Signal recognition particle protein
Q88MV6	4206633333	8516266667	7670266667	16267666667	15853666667	14399000000	PP_1462		8.09327e+09	0.0522657	1.92393	0.258589	30S ribosomal protein S16
Q88MV5	26450000	3.02093e+07	0	67369000	9.85413e+07	108359000	PP_1463		1.51047e+07	1	0.571065	0.392614	Ribosome maturation factor RimM
Q88MV3	7540566667	9769566667	10462966667	20398000000	21892666667	18132666667	PP_1465		1.01163e+10	0.0342715	1.34158	0.369672	50S ribosomal protein L19
Q88MU9	0	0	0	12052000	0	0	PP_1469		1e-05	0	#DIV/0!	0	Thiol:disulfide interchange protein DsbC
Q88MU8	1611500000	2026266667	1794466667	2884666667	2799366667	3036900000	PP_1470		1.91037e+09	0.060669	1.18546	0.558643	Homoserine dehydrogenase
Q88MU7	2140200000	2382633333	2161766667	3481233333	2929966667	3227466667	PP_1471		2.2722e+09	0.0486019	1.06168	0.614782	Threonine synthase
Q88MU3	2.91617e+08	1.92167e+08	169180000	1.19223e+08	9.42093e+07	1.53483e+08	PP_1475		1.80673e+08	0.0636139	0.619558	2.44597	CAIB/BAIF family protein
Q88MU2	43204000	5.65997e+07	58030000	4.69073e+07	6.12613e+07	6.12103e+07	PP_1476		5.73148e+07	0.0124779	1.32661	0.92105	Uncharacterized protein
Q88MU1	0	0	0	0	0	9.75667e+06	PP_1477		1e-05	0	#DIV/0!	#DIV/0!	Single-stranded-DNA-specific exonuclease RecJ
Q88MU0	2641233333	1062133333	1979400000	878890000	9.15553e+08	879100000	PP_1478		1.52077e+09	0.30158	0.575779	3.00519	Xenobiotic reductase, putative
Q88MT7	737540000	721600000	483550000	122160000	1.04444e+08	117030000	PP_1481		6.02575e+08	0.197527	0.817007	6.03749	Betaine aldehyde dehydrogenase, putative
Q88MT4	9546000	0	0	0	0	0	PP_1484		1e-05	0	1.04756e-12	#DIV/0!	Polyamine ABC transporter, ATP-binding protein
Q88MT2	1138050000	523500000	6.24053e+08	236830000	2.95367e+08	2.62897e+08	PP_1486		5.73777e+08	0.0876241	0.504175	4.80535	Polyamine ABC transporter, periplasmic polyamine-binding protein
Q88MT1	0	6.01407e+07	53373000	53477000	5.34363e+07	50161000	PP_1487		5.67568e+07	0.0596198	#DIV/0!	0	Uncharacterized protein
Q88MT0	3.58147e+08	193360000	260650000	1.65483e+08	8.90653e+07	1.46327e+08	PP_1488		2.27005e+08	0.148213	0.633833	2.16425	Methyl-accepting chemotaxis transducer
Q88MS6	23373000	0	25888000	0	0	0	PP_1492		1.2944e+07	1	0.553801	#DIV/0!	Sensor histidine kinase/response regulator
Q88MS5	6.05133e+06	0	0	0	0	0	PP_1493		1e-05	0	1.65253e-12	#DIV/0!	Chemotaxis response regulator protein-glutamate methylesterase of group 3 operon
Q88MS4	274720000	2.00107e+08	182020000	121040000	104742000	1.23127e+08	PP_1494		1.91063e+08	0.0473316	0.695484	2.26966	Response regulator/GGDEF domain protein
Q88MS3	1653400000	2303566667	2510933333	4689166667	4305900000	4480400000	PP_1496		2.40725e+09	0.0430713	1.45594	0.3526	Lysine--tRNA ligase
Q88MS0	167460000	1.20787e+08	3.62033e+07	31007000	2.46483e+07	2.26997e+07	PP_1499		7.8495e+07	0.538782	0.468739	5.40072	Uncharacterized protein
Q88MR9	3.03153e+06	0	0	0	0	0	PP_1500		1e-05	0	3.29866e-12	#DIV/0!	Lipoprotein, putative
Q88MR8	0	0	0	3.32023e+07	0	0	PP_1501		1e-05	0	#DIV/0!	0	Uncharacterized protein
Q88MR7	1071173333	5.22533e+08	2836833333	926430000	621170000	9.25837e+08	PP_1502		1.67968e+09	0.68891	1.56808	1.15624	OmpA family protein
Q88MR6	1.06787e+08	4.13597e+07	3.29687e+08	5.37647e+07	6.66917e+07	6.05453e+07	PP_1503		1.85523e+08	0.777065	1.73733	1.98619	Uncharacterized protein
Q88MR5	1.17723e+07	0	0	0	0	0	PP_1504		1e-05	0	8.49449e-13	#DIV/0!	Uncharacterized protein
Q88MR4	1089933333	1025490000	645040000	2.56187e+08	2.14937e+08	246420000	PP_1505		8.35265e+08	0.227742	0.766345	4.25445	Phosphoenolpyruvate carboxylase
P0A136	10401666667	8161900000	11673333333	5743666667	5327233333	5889966667	PP_1506		9.91762e+09	0.17703	0.953464	1.81098	Adenylate kinase
Q88MR3	0	0	1.22817e+07	0	2.77127e+07	0	PP_1507		6.14083e+06	1	#DIV/0!	#DIV/0!	Uncharacterized protein
Q88MR0	1.08699e+08	31661000	6.37787e+07	4.10507e+07	2.13677e+07	27215000	PP_1510		4.77198e+07	0.336523	0.43901	2.64791	Carboxyvinyl-carboxyphosphonate phosphorylmutase, putative
Q88MQ7	0	0	0	0	0	1.45467e+07	PP_1513		1e-05	0	#DIV/0!	#DIV/0!	Ribosomal RNA small subunit methyltransferase J
Q88MQ4	45638000	38819000	4.29227e+07	34452000	4.50813e+07	5.02813e+07	PP_1516		4.08708e+07	0.0502029	0.895544	1.32468	RND membrane fusion protein
Q88MQ3	7.34333e+06	0	0	0	0	0	PP_1517		1e-05	0	1.36178e-12	#DIV/0!	RND efflux transporter
Q88MQ2	443800000	7.87287e+08	617870000	9.90753e+08	658660000	9.49147e+08	PP_1518		7.02578e+08	0.120568	1.5831	0.447942	Uncharacterized protein
Q88MQ1	0	0	0	0	0	1.76453e+07	PP_1519		1e-05	0	#DIV/0!	#DIV/0!	Lipoprotein, putative
Q88MP8	541120000	2930133333	1893466667	2295533333	2035733333	1783300000	PP_1522		2.4118e+09	0.214916	4.45705	0.235727	Cold shock protein CspA
Q88MP5	17207000	14419000	7.45033e+06	4.49413e+07	63260000	5.94807e+07	PP_1525		1.09347e+07	0.31865	0.635478	0.382877	Succinyl-diaminopimelate desuccinylase
Q88MP4	0	0	0	0	0	10921000	PP_1526		1e-05	0	#DIV/0!	#DIV/0!	Beta-(1-3)-glucosyl transferase, putative
Q88MP3	0	0	2124300	0	0	0	PP_1527		1.06215e+06	1	#DIV/0!	#DIV/0!	ThiF family protein
Q88MP1	1133733333	1303433333	1662766667	3434966667	2326833333	3035133333	PP_1530		1.4831e+09	0.121143	1.30816	0.330057	2,3,4,5-tetrahydropyridine-2,6-dicarboxylate N-succinyltransferase
Q88MP0	3.36737e+07	26266000	2.04933e+07	4.93177e+07	2.09833e+07	3.28947e+07	PP_1531		2.33797e+07	0.123455	0.694301	0.682791	Uncharacterized protein
Q88MM3	0	1.20367e+07	1.74387e+07	1.79973e+07	3.76267e+07	23736000	PP_1548		1.47377e+07	0.183272	#DIV/0!	0	Uncharacterized protein
Q88MM2	132940000	130220000	100980000	7.51117e+07	6.74973e+07	6.93233e+07	PP_1549		1.156e+08	0.126471	0.869565	1.7699	Transcriptional regulator, Cro/CI family
Q88MJ5	7.87917e+07	52894000	97010000	36834000	1.78447e+07	7.94923e+07	PP_1576		7.4952e+07	0.294295	0.951268	2.1391	Immunity protein, putative
Q88MI6	0	0	0	0	0	16731000	PP_1585		1e-05	0	#DIV/0!	#DIV/0!	Antidote protein, putative
Q88MI3	8.06313e+08	1181000000	886130000	1277133333	1026380000	1098746667	PP_1588		1.03357e+09	0.142647	1.28184	0.631346	Aminotransferase, class I
Q88MI2	384500000	3.26803e+08	1.93293e+08	1.33897e+08	1.12513e+08	1.39533e+08	PP_1589		2.60048e+08	0.256702	0.676329	2.87162	Bifunctional uridylyltransferase/uridylyl-removing enzyme
Q88MI1	4.85267e+08	417500000	4.19487e+08	4.82517e+08	4.61773e+08	418800000	PP_1590		4.18493e+08	0.00237359	0.862399	1.0057	Methionine aminopeptidase
Q88MI0	6708233333	8244666667	9314800000	14687000000	16272000000	13567333333	PP_1591		8.77973e+09	0.0609434	1.3088	0.456746	30S ribosomal protein S2
Q88MH9	9889700000	14525666667	16299333333	22763666667	26836333333	23912666667	PP_1592		1.54125e+10	0.0575399	1.55844	0.434451	Elongation factor Ts
Q88MH8	3.16753e+08	6.09597e+08	3.87623e+08	9.36297e+08	908800000	9.13223e+08	PP_1593		4.9861e+08	0.222592	1.57413	0.338304	Uridylate kinase
Q88MH7	3817766667	6007633333	4885233333	5061366667	5748933333	6059433333	PP_1594		5.44643e+09	0.10304	1.4266	0.754296	Ribosome-recycling factor
Q88MH6	41189000	4.65147e+07	50085000	37220000	4.92437e+07	5.06297e+07	PP_1595		4.82998e+07	0.0369601	1.17264	1.10664	Ditrans,polycis-undecaprenyl-diphosphate synthase ((2E,6E)-farnesyl-diphosphate specific)
Q88MH4	0	0	0	1.06283e+07	0	0	PP_1597		1e-05	0	#DIV/0!	0	1-deoxy-D-xylulose 5-phosphate reductoisomerase
Q88MH3	0	0	0	8017000	0	0	PP_1598		1e-05	0	#DIV/0!	0	Zinc metalloprotease
Q88MH2	1666066667	1682333333	1353033333	2243133333	1950800000	1788900000	PP_1599		1.51768e+09	0.108488	0.910938	0.742741	Outer membrane protein assembly factor BamA
Q88MH1	5223366667	4462033333	4538866667	3940133333	4718600000	4420766667	PP_1600		4.50045e+09	0.00853618	0.861599	1.32568	Outer membrane protein OmpH
Q88MH0	108915000	1.58233e+08	147180000	1.98313e+08	1.16673e+08	1.10898e+08	PP_1601		1.52707e+08	0.0361914	1.40207	0.549207	UDP-3-O-acylglucosamine N-acyltransferase
Q88MG9	6.19937e+07	2.88467e+07	0	6.56393e+07	0	0	PP_1602		1.44233e+07	1	0.232658	0.944459	3-hydroxyacyl-[acyl-carrier-protein] dehydratase FabZ
Q88MG8	9.99907e+07	1.20413e+08	117418000	150590000	138470000	1.28027e+08	PP_1603		1.18916e+08	0.0125944	1.18927	0.663993	Acyl-[acyl-carrier-protein]--UDP-N-acetylglucosamine O-acyltransferase
Q88MG5	117069000	1.06535e+08	1.05042e+08	2.22593e+08	1.86217e+08	217480000	PP_1606		1.05789e+08	0.00705338	0.903642	0.525932	DNA-directed DNA polymerase
Q88MG4	1774100000	1437133333	1671566667	1879100000	1343600000	1798666667	PP_1607		1.55435e+09	0.075412	0.876134	0.944122	Acetyl-coenzyme A carboxylase carboxyl transferase subunit alpha
Q88MG1	2874433333	2384566667	2611600000	3101666667	3338566667	3441500000	PP_1610		2.49808e+09	0.0454415	0.86907	0.926738	CTP synthase
Q88MG0	386560000	2.97887e+08	277350000	4.31337e+08	3.31817e+08	405230000	PP_1611		2.87618e+08	0.0357012	0.744046	0.896191	2-dehydro-3-deoxyphosphooctonate aldolase 1
Q88MF9	4017333333	4886766667	5561933333	8425966667	7667866667	8115866667	PP_1612		5.22435e+09	0.0646173	1.30045	0.47678	Enolase
Q88MF8	8.24617e+07	40055000	5.22733e+07	36049000	41191000	4.84857e+07	PP_1613		4.61642e+07	0.132336	0.559826	2.28749	Cell division protein FtsB
Q88MF5	3.57267e+08	518570000	2.65697e+08	341250000	4.33583e+08	3.21823e+08	PP_1616		3.92133e+08	0.322433	1.09759	1.04694	D-isomer specific 2-hydroxyacid dehydrogenase family protein
Q88MF4	5.81833e+07	7.65157e+07	0	0	0	0	PP_1617		3.82578e+07	1	0.657539	#DIV/0!	Esterase, putative
Q88MF2	22829000	3.23687e+07	43531000	4.63017e+07	5.05263e+07	43792000	PP_1619		3.79498e+07	0.147067	1.66235	0.493049	tRNA pseudouridine synthase D
Q88MF1	0	0	0	0	0	20192000	PP_1620		1e-05	0	#DIV/0!	#DIV/0!	5'-nucleotidase SurE
Q88ME9	6.48083e+07	5.65083e+07	8.22663e+07	9.10593e+07	6.67537e+07	8.23993e+07	PP_1622		6.93873e+07	0.18561	1.07065	0.711715	Lipoprotein NlpD
Q88ME8	1438900000	1470066667	967260000	3.96933e+08	2.78523e+08	448400000	PP_1623		1.21866e+09	0.206294	0.846941	3.62504	RNA polymerase sigma factor RpoS
P0A122	3.92253e+08	3.91017e+08	4.15403e+08	710360000	712320000	6.90793e+08	PP_1625		4.0321e+08	0.0302407	1.02793	0.55219	Ferredoxin 1
Q88ME7	6.95833e+07	6.87667e+07	1.03715e+08	2.66997e+08	171750000	162850000	PP_1626		8.62407e+07	0.202619	1.23939	0.260615	DNA mismatch repair protein MutS
Q88ME4	624350000	1084566667	8.68267e+08	1467300000	1516533333	1125740000	PP_1629		9.76417e+08	0.110762	1.56389	0.425509	Protein RecA
Q88ME2	7.44337e+07	58421000	84626000	121878000	8.84333e+07	1.03818e+08	PP_1631		7.15235e+07	0.183192	0.960903	0.610723	Uncharacterized protein
Q88ME0	277120000	282210000	5.73703e+08	3.21137e+08	225070000	481600000	PP_1633		4.27957e+08	0.340564	1.5443	0.862935	Uncharacterized protein
Q88MD8	2.49633e+08	2.28367e+08	1.59407e+08	2.10783e+08	2.05057e+08	1.98163e+08	PP_1635		1.93887e+08	0.177836	0.776686	1.18431	DNA-binding response regulator
Q88MD5	6.54247e+08	1443266667	1471800000	3203333333	4287366667	3388366667	PP_1638		1.45753e+09	0.00978823	2.2278	0.204239	Ferredoxin--NADP reductase
Q88MD2	194580000	2.89027e+08	341460000	6.03133e+08	5.17973e+08	5.51587e+08	PP_1641		3.15243e+08	0.0831633	1.62012	0.322615	tRNA 2-thiocytidine biosynthesis protein TtcA
Q88MC9	9.50927e+07	9.29233e+07	139241000	69823000	7.52247e+07	120326000	PP_1644		1.16082e+08	0.199504	1.22073	1.36191	NAD(P)H dehydrogenase (quinone)
Q88MC8	1.41287e+08	199940000	1.81647e+08	3.05103e+08	2.42717e+08	3.17557e+08	PP_1645		1.90793e+08	0.0479402	1.3504	0.463078	Arsenate reductase
Q88MC7	2.22203e+08	1.46817e+08	200860000	2.75867e+08	1.71393e+08	1.76417e+08	PP_1646		1.73838e+08	0.155441	0.782339	0.805474	Thioredoxin, putative
Q88MC5	7.68623e+07	88288000	8.21503e+07	9.21687e+07	1.26693e+08	1.21436e+08	PP_1648		8.52192e+07	0.0360111	1.10872	0.833931	Uncharacterized protein
Q88MC4	1.2149e+08	1.03835e+08	7.35533e+07	8.28647e+07	5.20907e+07	2.51537e+07	PP_1649		8.8694e+07	0.170707	0.730054	1.46612	D-lactate dehydrogenase
Q88MC3	33849000	20701000	0	0	0	0	PP_1650		1.03505e+07	1	0.305785	#DIV/0!	Histidine kinase
Q88MC0	4.30907e+07	0	0	1.38497e+08	6.21477e+07	3.11903e+07	PP_1654		1e-05	0	2.32069e-13	0.311131	Cysteine synthase
Q88MB9	8.46567e+06	0	0	0	0	0	PP_1655		1e-05	0	1.18124e-12	#DIV/0!	23S rRNA (uracil(1939)-C(5))-methyltransferase RlmD
Q88MB8	4.59353e+08	2.63857e+08	3.48283e+08	4.86553e+08	3.20787e+08	4.09593e+08	PP_1656		3.0607e+08	0.137921	0.666306	0.944097	GTP pyrophosphokinase
Q88MB6	8.47173e+07	1.30921e+08	1.82733e+08	1.41417e+08	1.65987e+08	2.31423e+08	PP_1658		1.56827e+08	0.165191	1.85118	0.599062	Uncharacterized protein
Q88MB5	1983266667	6.03447e+08	1115533333	698860000	372670000	5.27293e+08	PP_1659		8.5949e+08	0.297901	0.433371	2.83786	Uncharacterized protein
Q88MB4	0	0	1.83687e+07	0	0	0	PP_1660		9.18433e+06	1	#DIV/0!	#DIV/0!	Uncharacterized protein
Q88MB3	1676966667	532380000	855460000	5.43447e+08	2.44157e+08	441820000	PP_1661		6.9392e+08	0.232793	0.413795	3.0858	Dehydrogenase subunit, putative
Q88MB1	4.54673e+08	3.42877e+08	7.77163e+08	480960000	2.09117e+08	5.87177e+08	PP_1663		5.6002e+08	0.387742	1.2317	0.945345	Uncharacterized protein
Q88MB0	6.91443e+07	1.08996e+08	1.16853e+08	1.27027e+08	77000000	99120000	PP_1664		1.12925e+08	0.0347886	1.63318	0.544329	Phosphoribosylglycinamide formyltransferase
Q88MA9	1111833333	7.53623e+08	1139933333	1662333333	775830000	1478933333	PP_1665		9.46778e+08	0.204013	0.851547	0.668839	Phosphoribosylformylglycinamidine cyclo-ligase
Q88MA8	1.1452e+08	1.1712e+08	7.57243e+07	68508000	7.73293e+07	54023000	PP_1666		9.64223e+07	0.21466	0.841967	1.67163	Uncharacterized protein
Q88MA2	0	5.15133e+07	2.38277e+07	1.35603e+07	4.48107e+07	0	PP_1672		3.76705e+07	0.367471	#DIV/0!	0	Cob(I)alamin adenosyltransferase
Q88M97	0	0	0	134887	0	0	PP_1677		1e-05	0	#DIV/0!	0	Cobyric acid synthase
Q88M88	521190000	9.51423e+07	2.62623e+08	5.59857e+07	6.11013e+07	5.69037e+07	PP_1686		1.78883e+08	0.46813	0.34322	9.30935	Glutathione peroxidase
Q88M74	0	0	2.38823e+06	0	0	0	PP_1700		1.19412e+06	1	#DIV/0!	#DIV/0!	Acyltransferase
Q88M72	521600000	5.81457e+08	8.11203e+08	1019266667	9.41357e+08	8.34823e+08	PP_1702		6.9633e+08	0.16497	1.33499	0.51174	Recombination-associated protein RdgC
Q88M60	1539600000	1157433333	2785200000	9.61223e+08	8.90567e+08	1324506667	PP_1714		1.97132e+09	0.412863	1.28041	1.60171	Peptidyl-prolyl cis-trans isomerase
Q88M58	0	4.30157e+07	2.66293e+07	2.53387e+07	0	0	PP_1716		3.48225e+07	0.235284	#DIV/0!	0	Transcriptional regulator, Cro/CI family
Q88M55	3619533333	2371366667	2307300000	1640100000	1755233333	1689200000	PP_1719		2.33933e+09	0.0136934	0.646308	2.2069	Tail-specific protease prc
Q88M54	3.35893e+08	3.54413e+08	335810000	1.76047e+08	229300000	172980000	PP_1720		3.45112e+08	0.0269526	1.02744	1.90798	Alcohol dehydrogenase, zinc-containing
Q88M53	1.19918e+08	1.82333e+08	6.34883e+07	3.51467e+07	2.87013e+07	3.58353e+07	PP_1721		1.22911e+08	0.48346	1.02496	3.41192	Hydrolase, haloacid dehalogenase-like family
Q88M52	0	1.96097e+06	0	0	0	0	PP_1722		980483	1	#DIV/0!	#DIV/0!	ABC transporter, ATP-binding protein
Q88M48	3131100000	3361333333	2054066667	4.48833e+08	463240000	5.19307e+08	PP_1726		2.7077e+09	0.241398	0.864776	6.97609	ABC transporter, periplasmic binding protein
Q88M44	3.36217e+08	2.55053e+08	1.86333e+08	3.97737e+08	415640000	4.06837e+08	PP_1730		2.20693e+08	0.155691	0.656402	0.845325	Probable M18 family aminopeptidase 2
Q88M43	1.67593e+08	2.06207e+08	1.44197e+08	107234000	8.86847e+07	0	PP_1732		1.75202e+08	0.176969	1.0454	1.56287	Cell division topological specificity factor
Q88M42	2210266667	2030933333	2444133333	1969166667	1772966667	1955066667	PP_1733		2.23753e+09	0.0923338	1.01234	1.12244	Site-determining protein
Q88M41	8.78167e+07	1.43487e+08	47420000	4.16167e+07	0	8.87633e+07	PP_1734		9.54533e+07	0.503213	1.08696	2.11013	Probable septum site-determining protein MinC
Q88M40	1.96957e+06	0	0	0	0	0	PP_1735		1e-05	0	5.07726e-12	#DIV/0!	Lipid A biosynthesis lauroyltransferase
Q88M37	47959000	4.27853e+07	8.92773e+07	2.78797e+07	0	2.03537e+07	PP_1738		6.60313e+07	0.352045	1.37683	1.72021	Uncharacterized protein
Q88M34	4.20517e+08	1.0158e+08	9.99737e+07	6.19927e+07	7.04923e+07	6.22637e+07	PP_1741		1.00777e+08	0.00796811	0.23965	6.78333	Glycine betaine-binding protein, putative
Q88M33	0	0	0	0	3.67233e+06	0	PP_1742		1e-05	0	#DIV/0!	#DIV/0!	Uncharacterized protein
Q88M32	5.22853e+07	1189566667	3.82527e+08	4.51843e+07	4.10503e+07	5.23077e+07	PP_1743		7.86047e+08	0.513354	15.0338	1.15716	Phenylacetic acid transporter PhaJ
Q88M27	1.32133e+08	0	1.58203e+08	0	4.40067e+07	29508000	PP_1748		7.91017e+07	1	0.59865	#DIV/0!	Uncharacterized protein
Q88M26	0	0	0	0	0	3.50533e+06	PP_1749		1e-05	0	#DIV/0!	#DIV/0!	Acetyltransferase, GNAT family
Q88M25	9.74367e+06	3.68747e+07	1.48565e+08	0	14584000	1.13937e+07	PP_1750		9.272e+07	0.602301	9.51592	#DIV/0!	Asparagine synthetase
Q88M23	8.80227e+08	6.90707e+08	639570000	3.51627e+08	3.70327e+08	313570000	PP_1752		6.65138e+08	0.0384406	0.755644	2.5033	Uncharacterized protein
Q88M20	1560233333	1182333333	1846466667	4.10653e+08	2.48573e+08	4.53867e+08	PP_1755		1.5144e+09	0.219273	0.970624	3.79939	Fumarate hydratase class II
Q88M19	7.87423e+08	9.21157e+08	1146433333	1006816667	654280000	935700000	PP_1756		1.03379e+09	0.108956	1.31288	0.782092	Uncharacterized protein
Q88M18	1.27033e+08	121880000	1.72417e+08	5.09567e+07	4.42933e+07	48370000	PP_1757		1.47148e+08	0.17172	1.15834	2.49297	BolA protein
Q88M17	5.23137e+07	6.80453e+07	1.73939e+08	289510000	1.84287e+08	2.86367e+08	PP_1758		1.20992e+08	0.437606	2.31282	0.180697	UPF0176 protein PP_1758
Q88M16	0	0	0	0	0	4.42567e+06	PP_1759		1e-05	0	#DIV/0!	#DIV/0!	Uncharacterized protein
Q88M14	3.20197e+07	0	0	0	0	0	PP_1761		1e-05	0	3.12308e-13	#DIV/0!	Sensory box protein/GGDEF family protein
Q88M12	2.92623e+08	1.79943e+08	243230000	3.09397e+08	109864000	2.39107e+08	PP_1763		2.11587e+08	0.149553	0.723068	0.945787	Oxidoreductase, short chain dehydrogenase/reductase family
Q88M11	3.55083e+08	422280000	5.05377e+08	514120000	2.13813e+08	4.59343e+08	PP_1764		4.63828e+08	0.089577	1.30625	0.690662	Hydrolase, haloacid dehalogenase-like family
Q88M10	2.99597e+08	2.71327e+08	2.73527e+08	3.92927e+08	204050000	3.35197e+08	PP_1765		2.72427e+08	0.00403778	0.909311	0.762475	Ubiquinone biosynthesis O-methyltransferase
Q88M08	1948300000	1108900000	1948133333	3160466667	1371000000	2722800000	PP_1767		1.52852e+09	0.274525	0.784539	0.61646	DNA gyrase subunit A
Q88M07	1225500000	1274900000	1577866667	2828566667	1744733333	2481100000	PP_1768		1.42638e+09	0.106201	1.16392	0.433258	Phosphoserine aminotransferase
Q88M06	9.58797e+08	6.58973e+08	843880000	1226333333	920740000	1258200000	PP_1769		7.51427e+08	0.123037	0.783718	0.78184	Chorismate mutase/prephenate dehydratase
Q88M05	1509300000	1253333333	1460966667	2093166667	1545000000	1658366667	PP_1770		1.35715e+09	0.0764961	0.899192	0.721061	3-phosphoshikimate 1-carboxyvinyltransferase
Q88M04	4.04347e+08	3.86673e+08	4.59223e+08	8.03697e+08	5.51417e+08	6.99197e+08	PP_1771		4.22948e+08	0.085767	1.046	0.503109	Cytidylate kinase
Q88M03	18125333333	23851000000	28464666667	37859333333	42368333333	39949000000	PP_1772		2.61578e+10	0.088189	1.44316	0.478755	30S ribosomal protein S1
P0A128	1076386667	5.22137e+08	657930000	2.45503e+08	2.49787e+08	4.12743e+08	PP_1773		5.90033e+08	0.115073	0.548161	4.38441	Integration host factor subunit beta
Q88M00	4.22027e+08	316500000	3.89867e+08	7.22947e+08	4.81677e+08	5.70473e+08	PP_1776		3.53183e+08	0.103865	0.836874	0.583759	Mannose-6-phosphate isomerase/mannose-1-phosphate guanylyltransferase
Q88LZ9	9.10457e+07	125030000	1.75733e+08	410620000	273590000	4.52923e+08	PP_1777		1.50382e+08	0.168582	1.65172	0.221727	Phosphomannomutase
Q88LZ7	87195000	58638000	1.15693e+08	2.43893e+08	1.27683e+08	2.33183e+08	PP_1779		8.71657e+07	0.327281	0.999664	0.357513	Lipopolysaccharide ABC export system, ATP-binding protein
Q88LZ6	280810000	219790000	353730000	4.76977e+08	2.93557e+08	4.63323e+08	PP_1780		2.8676e+08	0.23354	1.02119	0.588729	Mannosyltransferase, putative
Q88LZ4	67732000	284380000	1.84967e+08	7.45073e+08	6.05443e+08	5.26897e+08	PP_1782		2.34673e+08	0.211812	3.46473	0.0909065	dTDP-4-dehydrorhamnose 3,5-epimerase
Q88LZ3	5.78957e+08	1463933333	1220566667	2600500000	2508600000	2311566667	PP_1783		1.34225e+09	0.0906562	2.31839	0.222633	Glucose-1-phosphate thymidylyltransferase
Q88LZ2	130861000	158450000	1.37637e+08	3.55853e+08	4.02793e+08	3.14363e+08	PP_1784		1.48043e+08	0.0702947	1.1313	0.367739	dTDP-4-dehydrorhamnose reductase
Q88LZ1	5.93317e+08	1466900000	1311866667	2866300000	3274000000	2386966667	PP_1785		1.38938e+09	0.0557921	2.34172	0.206997	dTDP-glucose 4,6-dehydratase
Q88LZ0	1185166667	2251900000	1829600000	4591766667	4694800000	4328033333	PP_1786		2.04075e+09	0.103467	1.72191	0.258107	Glycosyl transferase, putative
Q88LY9	0	0	0	0	7529000	0	PP_1787		1e-05	0	#DIV/0!	#DIV/0!	Uncharacterized protein
Q88LY8	7.64537e+07	1.20933e+08	1.34993e+08	4.69603e+08	1.99147e+08	4.17377e+08	PP_1788		1.27963e+08	0.0549376	1.67374	0.162805	Uncharacterized protein
Q88LY7	44966000	5.95483e+07	1.15515e+08	5.90797e+08	358560000	492680000	PP_1789		8.75318e+07	0.319695	1.94662	0.0761108	Hydrolase, haloacid dehalogenase-like family
Q88LY6	194910000	148930000	3.30743e+08	1.91767e+08	121646000	321910000	PP_1790		2.39837e+08	0.379036	1.2305	1.01639	Acylneuraminate cytidylyltransferase, putative
Q88LY5	4.50297e+08	1006983333	9.41043e+08	2081200000	1071546667	1474633333	PP_1791		9.74013e+08	0.0338496	2.16305	0.216364	Aldolase/synthase, putative
Q88LY4	3.05157e+08	4.63903e+08	5.53977e+08	1118383333	7.18243e+08	1123000000	PP_1792		5.0894e+08	0.0884911	1.6678	0.272855	Glycosyl transferase, group 2 family protein
Q88LY3	3.64557e+07	46192000	6.47083e+07	1.22106e+08	6.72987e+07	184220000	PP_1793		5.54502e+07	0.166964	1.52103	0.298557	Glycosyl transferase, group 2 family protein
Q88LY2	56756000	8.76173e+07	9.08673e+07	1023796667	814570000	9.29837e+08	PP_1794		8.92423e+07	0.0182088	1.57239	0.0554368	Uncharacterized protein
Q88LY1	7.95383e+07	73862000	139985000	7.90673e+08	4.27023e+08	5.63723e+08	PP_1795		1.06924e+08	0.309207	1.3443	0.100596	Uncharacterized protein
Q88LX8	2933600000	3388900000	3520300000	4760166667	4469600000	4380633333	PP_1799		3.4546e+09	0.0190181	1.1776	0.616281	GDP-mannose 4,6-dehydratase
Q88LX7	276030000	353930000	2.88747e+08	3.53313e+08	3.45623e+08	3.13083e+08	PP_1800		3.21338e+08	0.101425	1.16414	0.781261	Oxidoreductase Rmd
Q88LX6	9.88087e+07	62371000	7.95793e+07	5.23203e+07	5.59113e+07	5.95633e+07	PP_1801		7.09752e+07	0.121228	0.718309	1.88853	Glycosyl transferase WbpY
Q88LX5	0	0	0	0	1.88827e+07	0	PP_1802		1e-05	0	#DIV/0!	#DIV/0!	Glycosyl transferase WbpZ
Q88LX1	0	1.59003e+07	0	0	0	0	PP_1806		7.95017e+06	1	#DIV/0!	#DIV/0!	Arabinose 5-phosphate isomerase
Q88LX0	4.70423e+08	5.60867e+08	583140000	5.00107e+08	442560000	6.17433e+08	PP_1807		5.72003e+08	0.0194696	1.21593	0.940646	2-dehydro-3-deoxyphosphooctonate aldolase 2
Q88LW9	0	0	0	0	0	64290000	PP_1808		1e-05	0	#DIV/0!	#DIV/0!	Glucose-6-phosphate isomerase 1
Q88LW3	8.29673e+07	15668800	45231000	1.00121e+07	1.59797e+07	1.70059e+07	PP_1814		3.04499e+07	0.485424	0.367011	8.28668	Uncharacterized protein
Q88LW2	1.88344e+08	98321000	1.43123e+08	376960000	2.85567e+08	3.14527e+08	PP_1815		1.20722e+08	0.18556	0.640965	0.49964	Orotidine 5'-phosphate decarboxylase
Q88LW1	3.07947e+08	2.34813e+08	1.99177e+08	156200000	1.37927e+08	1.05296e+08	PP_1816		2.16995e+08	0.082114	0.704651	1.97149	Alcohol dehydrogenase, zinc-containing
Q88LV8	2.91267e+08	1.30868e+08	40705000	3.82133e+07	21182000	29590000	PP_1819		8.57867e+07	0.525509	0.29453	7.62212	Methyl-accepting chemotaxis transducer
Q88LV5	0	0	0	0	0	9092000	PP_1822		1e-05	0	#DIV/0!	#DIV/0!	Uncharacterized protein
Q88LV4	3.85737e+08	3.77583e+08	2.41027e+08	225560000	308290000	244170000	PP_1823		3.09305e+08	0.220748	0.801855	1.71013	GTP cyclohydrolase 1 1
Q88LV3	38375000	5.47233e+07	1.58593e+07	8.25143e+07	43974000	94172000	PP_1824		3.52913e+07	0.550617	0.919644	0.465071	Smr domain protein
Q88LV1	90845000	1.34403e+08	1.02362e+08	1.59103e+08	1.64457e+08	1.2117e+08	PP_1826		1.18383e+08	0.135331	1.30313	0.570981	Hydrolase, isochorismatase family
Q88LV0	6.95417e+07	68507000	68475000	1.46763e+08	87501000	8.88017e+07	PP_1827		6.8491e+07	0.000233607	0.984892	0.473835	50S ribosomal protein L3 glutamine methyltransferase
Q88LU7	4.09017e+08	409250000	386820000	4.41517e+08	332850000	4.75987e+08	PP_1830		3.98035e+08	0.0281759	0.973151	0.92639	Chorismate synthase
Q88LU6	0	0	0	0	3093100	0	PP_1831		1e-05	0	#DIV/0!	#DIV/0!	Membrane protein, putative
Q88LU5	2.61643e+08	2.61773e+08	3.05433e+08	2.20987e+08	1.36173e+08	2.38657e+08	PP_1832		2.83603e+08	0.0769737	1.08393	1.18398	1,2-dihydroxy-3-keto-5-methylthiopentene dioxygenase
Q88LU3	0	0	0	0	14763000	0	PP_1834		1e-05	0	#DIV/0!	#DIV/0!	Ankyrin domain protein
Q88LT9	3.21167e+08	8.76117e+08	384580000	4.92307e+08	4.95217e+08	4.48753e+08	PP_1838		6.30348e+08	0.389893	1.96268	0.652371	Uncharacterized protein
Q88LT5	4.99457e+08	4.29067e+08	3.87793e+08	131620000	2.18683e+08	152960000	PP_1842		4.0843e+08	0.0505268	0.817749	3.79469	Glutamine amidotransferase, class I
Q88LS1	0	0	0	4.19433e+06	0	0	PP_1857		1e-05	0	#DIV/0!	0	Uncharacterized protein
Q88LS0	5133700000	6045833333	6908800000	7511266667	8651400000	7831133333	PP_1858		6.47732e+09	0.0666145	1.26172	0.683467	Elongation factor P
Q88LR9	6106400000	1597633333	1440266667	5.83787e+08	6.80673e+08	7.59813e+08	PP_1859		1.51895e+09	0.0518011	0.248747	10.46	Organic hydroperoxide resistance protein
Q88LR3	8.23473e+07	9.41023e+07	9.05713e+07	1.43067e+08	1.04748e+08	1.21113e+08	PP_1866		9.23368e+07	0.0191202	1.12131	0.575587	Phospho-2-dehydro-3-deoxyheptonate aldolase, class II
Q88LR1	8.53267e+08	1525066667	1374166667	3775866667	3049700000	3228566667	PP_1868		1.44962e+09	0.0520482	1.6989	0.225979	ATP-dependent RNA helicase DeaD
Q88LQ9	0	0	0	0	0	5149000	PP_1870		1e-05	0	#DIV/0!	#DIV/0!	Thiopurine S-methyltransferase
Q88LQ7	2.75797e+08	2.54667e+08	2.59003e+08	4.97063e+08	4.46143e+08	408940000	PP_1872		2.56835e+08	0.00844251	0.931248	0.554852	Aminotransferase, class I
Q88LQ6	103336000	119480000	90687000	3.25587e+07	70280000	44730000	PP_1873		1.05084e+08	0.137001	1.01691	3.17384	Peptide methionine sulfoxide reductase MsrB
Q88LQ5	2.85257e+08	349960000	2.28367e+08	1.27607e+08	1.36613e+08	116369000	PP_1874		2.89163e+08	0.21025	1.0137	2.23544	Glutathione peroxidase
Q88LQ3	3.35163e+08	427080000	3.90243e+08	4.86923e+08	561090000	5.09837e+08	PP_1876		4.08662e+08	0.0450699	1.21929	0.688329	Uncharacterized protein
Q88LQ2	0	0	0	0	0	7949000	PP_1877		1e-05	0	#DIV/0!	#DIV/0!	GAF domain protein
Q88LQ1	6.23847e+07	9.69343e+07	4.51253e+07	11058000	29874000	9.69133e+06	PP_1878		7.10298e+07	0.364699	1.13858	5.64159	Uncharacterized protein
Q88LN6	1155280000	5.41443e+08	7.17657e+08	1.33117e+08	8.59853e+07	121424000	PP_1893		6.2955e+08	0.139952	0.544933	8.6787	Acyl-CoA dehydrogenase, putative
Q88LN5	0	0	0	9442000	0	0	PP_1894		1e-05	0	#DIV/0!	0	Glutathione S-transferase family protein
Q88LN4	6.84867e+07	1.11257e+08	94675000	1.41337e+08	1.20757e+08	1.45757e+08	PP_1895		1.02966e+08	0.0805202	1.50344	0.484562	ABC transporter, ATP-binding protein
Q88LN0	0	0	0	0	0	1.12367e+07	PP_1899		1e-05	0	#DIV/0!	#DIV/0!	ExbD/TolR family protein
Q88LM8	459430000	4.23517e+08	438920000	829220000	492260000	6.00693e+08	PP_1901		4.31218e+08	0.0178602	0.938594	0.554051	UPF0434 protein PP_1901
Q88LM7	494450000	358770000	4.92583e+08	725180000	572030000	7.01707e+08	PP_1902		4.25677e+08	0.157177	0.860909	0.681831	3-deoxy-manno-octulosonate cytidylyltransferase
Q88LM6	53701000	17271000	5.33683e+07	6.10213e+07	5.11827e+07	6.64377e+07	PP_1903		3.53197e+07	0.511009	0.65771	0.880036	Protein-tyrosine-phosphatase
Q88LM5	0	0	0	0	0	7.77467e+06	PP_1904		1e-05	0	#DIV/0!	#DIV/0!	UDP-N-acetylenolpyruvoylglucosamine reductase
Q88LM4	2860100000	3661433333	3601533333	5041333333	4801500000	4452900000	PP_1905		3.63148e+09	0.00824732	1.26971	0.56733	Ribonuclease E
Q88LM3	0	0	0	8.97567e+06	0	0	PP_1907		1e-05	0	#DIV/0!	0	Hydrolase, haloacid dehalogenase-like family
Q88LM2	1.73493e+08	1.41333e+08	214580000	2.65347e+08	141950000	178121000	PP_1908		1.77957e+08	0.205799	1.02573	0.653836	Peptidase, putative
Q88LM1	0	0	1.01353e+06	0	0	0	PP_1909		506767	1	#DIV/0!	#DIV/0!	Maf-like protein PP_1909
Q88LM0	2.16977e+08	2.41213e+08	2.48723e+08	5.05743e+08	4.15437e+08	3.98767e+08	PP_1910		2.44968e+08	0.0153285	1.12901	0.429025	Uncharacterized protein
Q88LL9	3261600000	4107366667	4493000000	3812466667	6311300000	5776466667	PP_1911		4.30018e+09	0.0448392	1.31843	0.855509	50S ribosomal protein L32
Q88LL7	1178726667	1481266667	1252213333	1062490000	996300000	1075266667	PP_1913		1.36674e+09	0.0837955	1.15951	1.1094	Malonyl CoA-acyl carrier protein transacylase
Q88LL6	4623766667	4423066667	3823800000	4347500000	3460933333	3734366667	PP_1914		4.12343e+09	0.072666	0.891791	1.06355	3-oxoacyl-(Acyl-carrier-protein) reductase
Q88LL5	6880533333	8460566667	8318333333	6023966667	7748466667	8894833333	PP_1915		8.38945e+09	0.00847692	1.2193	1.14219	Acyl carrier protein
Q88LL4	1.96017e+08	1.82043e+08	175710000	170140000	1.43437e+08	150710000	PP_1916		1.78877e+08	0.0177031	0.912558	1.15209	3-oxoacyl-[acyl-carrier-protein] synthase 2
Q88LK9	0	0	0	0	0	5.85133e+06	PP_1922		1e-05	0	#DIV/0!	#DIV/0!	Uncharacterized protein
Q88LJ1	64092000	8.35987e+07	7.20987e+07	83238000	59259000	48457000	PP_1941		7.78487e+07	0.0738613	1.21464	0.769985	Uncharacterized protein
Q88LJ0	1.23177e+08	243950000	88610000	89080000	23048000	0	PP_1942		1.6628e+08	0.467104	1.34993	1.38276	Transcriptional regulator, LysR family
Q88LI6	2.34767e+07	86191000	4.90667e+07	1.90103e+07	3.67377e+07	21914000	PP_1946		6.76288e+07	0.274471	2.88068	1.23494	Oxidoreductase, short chain dehydrogenase/reductase family
Q88LH4	3.14473e+07	1.01531e+08	0	0	0	0	PP_1958		5.07653e+07	1	1.6143	#DIV/0!	Uncharacterized protein
Q88LH3	233360000	0	0	0	0	0	PP_1959		1e-05	0	4.28522e-14	#DIV/0!	Uncharacterized protein
Q88LG8	95989000	6.80523e+07	66468000	0	71170000	42388000	PP_1964		6.72602e+07	0.0117776	0.700707	#DIV/0!	Deoxynucleotide monophosphate kinase, putative
Q88LG6	5.72943e+07	6.19543e+07	55588000	6.27417e+07	7.20667e+07	5.98577e+07	PP_1967		5.87712e+07	0.054162	1.02578	0.913178	Deoxyribonuclease, TatD family
Q88LG5	2.76167e+08	2.19027e+08	220970000	1.21603e+08	201460000	1.82087e+08	PP_1968		2.19998e+08	0.0044167	0.796614	2.27105	Transcriptional regulator, TetR family
Q88LG3	4.50023e+07	1.78597e+07	2.04023e+07	1.66253e+07	15897000	1.73977e+07	PP_1970		1.9131e+07	0.0664541	0.425111	2.70685	Lipoprotein, putative
Q88LG2	2.49347e+08	2.37963e+08	8.21443e+07	58790000	61144000	34377000	PP_1971		1.60054e+08	0.486771	0.641893	4.24131	Uncharacterized protein
Q88LG1	3156000000	1667633333	2492000000	5943000000	2898433333	4801900000	PP_1972		2.07982e+09	0.198183	0.659004	0.531045	Aromatic-amino-acid aminotransferase
Q88LF9	0	6.20467e+06	0	0	0	0	PP_1974		3.10233e+06	1	#DIV/0!	#DIV/0!	UvrABC system protein B
Q88LF6	8.87507e+08	9.48117e+08	8.65517e+08	1750733333	1381633333	1414400000	PP_1977		9.06817e+08	0.0455439	1.02176	0.506934	Glutamate--tRNA ligase
Q88LF3	1.73503e+07	0	0	0	0	0	PP_1980		1e-05	0	5.76358e-13	#DIV/0!	Uncharacterized protein
Q88LF1	1.07181e+08	2.33367e+08	300030000	9.74297e+08	559810000	1086966667	PP_1982		2.66698e+08	0.124979	2.48829	0.110009	Heat-shock protein IbpA
Q88LF0	5.73937e+08	3.04297e+08	175680000	9.56413e+07	1.07238e+08	9.74217e+07	PP_1983		2.39988e+08	0.267964	0.418144	6.00093	Sensory box protein
Q88LE8	1117433333	2026266667	2255766667	4532500000	4072566667	4116200000	PP_1985		2.14102e+09	0.053596	1.91601	0.246538	3-isopropylmalate dehydratase large subunit
Q88LE7	7.68033e+08	1405966667	1584400000	3958666667	2649800000	2812533333	PP_1986		1.49518e+09	0.0596694	1.94677	0.194013	3-isopropylmalate dehydratase small subunit
Q88LE6	131379000	2.80193e+08	2.30737e+08	520960000	2.71417e+08	4.15627e+08	PP_1987		2.55465e+08	0.0967973	1.94449	0.252186	Methlytransferase, UbiE/COQ5 family
Q88LE5	1278000000	2096633333	2049700000	4372966667	3747333333	3715633333	PP_1988		2.07317e+09	0.0113192	1.6222	0.29225	3-isopropylmalate dehydrogenase
Q88LE4	3720400000	3694100000	4056900000	6128933333	5480933333	5637033333	PP_1989		3.8755e+09	0.0468069	1.04169	0.607022	Aspartate-semialdehyde dehydrogenase
Q88LE2	5.12343e+07	2.11713e+08	6.63933e+07	166069000	4.75887e+08	1.89283e+08	PP_1992		1.39053e+08	0.522533	2.71407	0.308512	Semialdehyde dehydrogenase family protein
Q88LE1	2265766667	1940100000	1428066667	1301833333	1153133333	1163766667	PP_1993		1.68408e+09	0.152021	0.743273	1.74044	Uncharacterized protein
Q88LE0	0	0	0	0	0	9.46067e+06	PP_1995		1e-05	0	#DIV/0!	#DIV/0!	N-(5'-phosphoribosyl)anthranilate isomerase
Q88LD9	1341700000	1479966667	1567866667	1984033333	1069210000	1566066667	PP_1996		1.52392e+09	0.0288402	1.13581	0.676249	Acetyl-coenzyme A carboxylase carboxyl transferase subunit beta
Q88LD8	1.72677e+08	181140000	2.06053e+08	2.17297e+08	1.58177e+08	1.87827e+08	PP_1997		1.93597e+08	0.0643434	1.12115	0.794659	Folylpolyglutamate synthetase
Q88LD7	4.97133e+07	1.89627e+07	1.01787e+07	20262000	8716000	0	PP_1998		1.45707e+07	0.301428	0.293094	2.45353	Uncharacterized protein
Q88LD5	1183933333	1059726667	1329333333	1866433333	1780066667	1654133333	PP_2000		1.19453e+09	0.112851	1.00895	0.634329	Amidophosphoribosyltransferase
Q88LD4	2.41667e+08	1.32297e+08	1.83363e+08	247310000	2.16877e+08	2.18853e+08	PP_2001		1.5783e+08	0.161777	0.65309	0.977181	O-succinylhomoserine sulfhydrylase
Q88LC9	1772266667	1.58307e+08	2.99927e+08	7.92863e+08	103495000	609200000	PP_2006		2.29117e+08	0.309057	0.129279	2.23527	Uncharacterized protein
Q88LC8	505990000	2.51397e+07	161511000	1.56753e+08	19999000	8.92107e+07	PP_2007		9.33253e+07	0.730623	0.184441	3.22794	P-47-related protein
Q88LC7	22225000	114521000	9.17067e+07	3.98823e+07	0	4.87427e+07	PP_2008		1.03114e+08	0.110627	4.63954	0.557264	2,4-dienoyl-CoA reductase FadH
Q88LC3	2.44583e+08	172250000	1.20027e+08	1.33993e+08	134150000	124164000	PP_2012		1.46138e+08	0.178678	0.597499	1.82534	NAD kinase
Q88LC2	4.69567e+06	0	0	0	0	0	PP_2013		1e-05	0	2.12962e-12	#DIV/0!	Uncharacterized protein
Q88LC0	5.95943e+07	7.42277e+07	69051000	246060000	1.72587e+08	187480000	PP_2015		7.16393e+07	0.0361301	1.20212	0.242194	Uncharacterized protein
Q88LB9	0	0	0	0	0	8.71367e+06	PP_2016		1e-05	0	#DIV/0!	#DIV/0!	Uncharacterized protein
Q88LB8	1965200000	1472366667	1635433333	1616966667	1176533333	1293466667	PP_2017		1.5539e+09	0.0524701	0.790708	1.21536	Aminopeptidase N
Q88LB7	52898000	7.37033e+07	51130000	8.18167e+06	8558000	0	PP_2018		6.24167e+07	0.180828	1.17994	6.46543	BNR domain protein
Q88LB6	1.50452e+08	1.63523e+08	107724000	32500000	2.88787e+07	2.70897e+07	PP_2019		1.35624e+08	0.205714	0.901439	4.6293	Membrane protein, putative
Q88LB4	2.42113e+08	6.57923e+07	7.00183e+07	5.01303e+07	4.16517e+07	5.00047e+07	PP_2021		6.79053e+07	0.0311168	0.280469	4.82968	Uncharacterized protein
Q88LB1	1.93453e+08	2.88147e+08	1.82777e+08	4.06913e+08	347200000	3.67653e+08	PP_2024		2.35462e+08	0.223752	1.21715	0.475417	Exonuclease SbcC
Q88LB0	0	15475000	2.02067e+07	0	2.31883e+07	0	PP_2025		1.78408e+07	0.132608	#DIV/0!	#DIV/0!	Exonuclease SbcD
Q88L99	4.15717e+07	359230000	5.43573e+07	46893000	5.48233e+07	2.64107e+07	PP_2036		2.06794e+08	0.737142	4.97439	0.886522	Dihydrodipicolinate synthase, putative
Q88L94	0	0	0	0	0	1.10497e+07	PP_2041		1e-05	0	#DIV/0!	#DIV/0!	Transcriptional regulator, LysR family
Q88L88	9.84937e+08	2590400000	3404000000	4.45717e+07	2.72213e+08	2.63983e+08	PP_2047		2.9972e+09	0.135727	3.04304	22.0978	3-hydroxyacyl-CoA dehydrogenase family protein
Q88L87	2732433333	7444533333	7391400000	1.69917e+08	1274966667	1250833333	PP_2048		7.41797e+09	0.00358139	2.71478	16.081	Acyl-CoA dehydrogenase, putative
Q88L86	756750000	1694833333	1967066667	14546700	2.05557e+08	227980000	PP_2049		1.83095e+09	0.0743421	2.41949	52.0221	Alcohol dehydrogenase, iron-containing
Q88L84	2324533333	4824533333	5982333333	9.21783e+07	7.81783e+08	8.52127e+08	PP_2051		5.40343e+09	0.107136	2.32452	25.2178	Acetyl-CoA acetyltransferase
Q88L83	0	0	0	0	22422000	0	PP_2052		1e-05	0	#DIV/0!	#DIV/0!	Hydrolase, haloacid dehalogenase-like family
Q88L82	142800000	97429000	1.06712e+08	61121000	7.82447e+07	8.19113e+07	PP_2053		1.0207e+08	0.0454719	0.714778	2.33635	Uncharacterized protein
Q88L76	0	59669000	2.91677e+08	5.30733e+07	5.28377e+07	4.28323e+07	PP_2059		1.75673e+08	0.66034	#DIV/0!	0	UPF0337 protein PP_2059
Q88L58	0	9.90437e+07	3.39807e+07	1.21584e+08	4.00653e+08	1.05041e+08	PP_2077		6.65122e+07	0.489106	#DIV/0!	0	Diaminopimelate decarboxylase
Q88L55	1984300000	3367066667	1945766667	1429266667	1528066667	1237900000	PP_2080		2.65642e+09	0.267522	1.33872	1.38833	Uncharacterized protein
Q88L54	2.53697e+08	2.92513e+08	231550000	2.86767e+08	207100000	2.75887e+08	PP_2081		2.62032e+08	0.116328	1.03285	0.88468	Putative phosphoenolpyruvate synthase regulatory protein
Q88L53	8220500000	9038700000	10110133333	13070000000	8838000000	11515666667	PP_2082		9.57442e+09	0.0559529	1.1647	0.628959	Phosphoenolpyruvate synthase
Q88L51	1732666667	1393733333	1157366667	674110000	5.89223e+08	816170000	PP_2084		1.27555e+09	0.0926528	0.736177	2.5703	Putative 4-hydroxy-4-methyl-2-oxoglutarate aldolase
Q88L50	5.01067e+06	0	0	0	0	0	PP_2085		1e-05	0	1.99574e-12	#DIV/0!	CmaX protein
Q88L49	28787000	0	0	1.11707e+07	0	0	PP_2086		1e-05	0	3.47379e-13	2.57702	CrfX protein
Q88L48	1.87073e+08	9.89517e+07	1.36117e+08	122910000	5.36443e+07	8.70723e+07	PP_2087		1.17534e+08	0.158103	0.628279	1.52204	CmpX protein
Q88L47	0	0	0	0	0	1.63817e+07	PP_2088		1e-05	0	#DIV/0!	#DIV/0!	RNA polymerase sigma factor SigX
Q88L46	26606666667	18154333333	42258000000	30116333333	19708000000	28919000000	PP_2089		3.02062e+10	0.398986	1.13529	0.883463	Outer membrane protein OprF
Q88L40	593880000	449100000	4.26207e+08	7.53013e+08	6.95663e+08	6.80707e+08	PP_2095		4.37653e+08	0.0261546	0.736939	0.788671	Dihydroorotate dehydrogenase (quinone)
Q88L39	1.48117e+08	1.18873e+08	1.28203e+08	1.86913e+08	1.63773e+08	1.73403e+08	PP_2096		1.23538e+08	0.0377616	0.834061	0.792435	Ribosomal RNA large subunit methyltransferase K/L
Q88L37	227670000	9.05667e+07	2.07507e+08	1.02879e+08	1.30423e+08	220510000	PP_2098		1.49037e+08	0.39232	0.654617	2.213	D-alanyl-D-alanine carboxypeptidase
Q88L36	393320000	416640000	645730000	3.90237e+08	3.76433e+08	5.38643e+08	PP_2099		5.31185e+08	0.215641	1.35052	1.0079	Uncharacterized protein
Q88L33	3.61503e+07	3.60507e+07	1.51053e+07	0	0	0	PP_2102		2.5578e+07	0.40944	0.707545	#DIV/0!	Deoxyguanosinetriphosphate triphosphohydrolase, putative
Q88L30	3244000000	3112766667	2957966667	1218100000	1279266667	1165576667	PP_2105		3.03537e+09	0.0254994	0.935686	2.66316	Uncharacterized protein
Q88L28	0	0	0	0	0	2.60597e+06	PP_2107		1e-05	0	#DIV/0!	#DIV/0!	Uncharacterized protein
Q88L25	1290433333	8.87307e+08	461100000	621330000	255600000	4.95397e+08	PP_2111		6.74203e+08	0.316082	0.522463	2.07689	Methyl-accepting chemotaxis transducer
Q88L24	1651800000	762900000	1405733333	5.41863e+08	966180000	545120000	PP_2112		1.08432e+09	0.296423	0.656445	3.04837	Aconitate hydratase
Q88L20	7.06713e+07	1.00267e+08	5.46193e+07	117490000	147210000	9.33267e+07	PP_2117		7.7443e+07	0.294716	1.09582	0.601509	Erythronate-4-phosphate dehydrogenase
Q88L19	0	1.86013e+07	0	0	0	0	PP_2118		9.30067e+06	1	#DIV/0!	#DIV/0!	Uncharacterized protein
Q88L16	113411000	1.29828e+08	6.78747e+08	5.85493e+07	0	1.03323e+08	PP_2121		4.04287e+08	0.678873	3.5648	1.93702	Lipoprotein, putative
Q88L14	6.11943e+07	5.81403e+07	8.55957e+07	79533000	51796000	6.36257e+07	PP_2123		7.1868e+07	0.191012	1.17442	0.769421	Molybdopterin biosynthesis MoeA protein
Q88L12	4.92467e+06	8541000	6.22683e+07	9326000	1.68573e+07	4.39233e+06	PP_2125		3.54047e+07	0.758761	7.18925	0.528058	Probable lipid kinase YegS-like
Q88L09	2.36393e+08	2.22983e+08	105410000	3.57027e+08	1.41827e+08	2.50837e+08	PP_2128		1.64197e+08	0.358026	0.694591	0.662117	Chemotaxis protein CheV
Q88L07	3.77297e+08	2.19547e+08	2.34383e+08	224830000	1.99783e+08	2.25553e+08	PP_2130		2.26965e+08	0.0326849	0.601556	1.67814	Soluble lytic transglycosylase, putative
Q88L06	2.52913e+08	4.07417e+08	4.47413e+08	829350000	6.43587e+08	7.21123e+08	PP_2131		4.27415e+08	0.046789	1.68997	0.304954	ABC transporter, ATP-binding protein
Q88L05	1241866667	1328233333	8.69583e+08	4.33187e+08	7.34707e+08	407700000	PP_2132		1.09891e+09	0.208684	0.884884	2.86682	Universal stress protein
Q88L02	754220000	4339433333	1558033333	663180000	1647633333	712800000	PP_2136		2.94873e+09	0.471626	3.90965	1.13728	Fatty acid oxidation complex subunit alpha
Q88L01	5.95383e+08	2862700000	9.56767e+08	3.64143e+08	9.42823e+08	323010000	PP_2137		1.90973e+09	0.499005	3.20757	1.63502	3-ketoacyl-CoA thiolase
Q88L00	9.81767e+07	2.35733e+08	1.30107e+08	147690000	1.94537e+08	135790000	PP_2138		1.8292e+08	0.288724	1.86317	0.664748	Uncharacterized protein
Q88KZ9	1020126667	1064400000	1089543333	1742700000	1679033333	1573466667	PP_2139		1.07697e+09	0.0116732	1.05572	0.585371	DNA topoisomerase 1
Q88KZ8	3.23623e+07	196530000	7.52403e+07	104127000	9.96083e+07	8.47587e+07	PP_2140		1.35885e+08	0.446295	4.19887	0.310797	Uncharacterized protein
P0A153	140490000	9.01043e+07	116310000	6.18693e+07	8.89383e+07	9.19843e+07	PP_2143		1.03207e+08	0.126957	0.734623	2.27075	LexA repressor 1
Q88KZ5	7.10233e+07	81370000	1.00493e+08	1.33723e+08	1.18243e+08	9.08733e+07	PP_2144		9.09317e+07	0.105152	1.28031	0.531121	Transcriptional regulator, TetR family
Q88KZ4	135110000	1.25909e+08	1.56997e+08	1.74117e+08	1.36347e+08	2.25917e+08	PP_2145		1.41453e+08	0.109886	1.04695	0.775974	Beta-hexosaminidase
Q88KZ2	0	0	4747000	0	0	0	PP_2147		2.3735e+06	1	#DIV/0!	#DIV/0!	Uncharacterized protein
Q88KZ1	3.08847e+08	2.29007e+08	1.97783e+08	3.16013e+08	204300000	2.26487e+08	PP_2148		2.13395e+08	0.0731585	0.690942	0.977322	Transcription-repair-coupling factor
Q88KZ0	7432866667	9206200000	11444333333	12895666667	12828333333	12428333333	PP_2149		1.03253e+10	0.108381	1.38914	0.576385	Glyceraldehyde-3-phosphate dehydrogenase
Q88KY8	1617266667	1620400000	1819200000	2630400000	2482666667	2219133333	PP_2151		1.7198e+09	0.0577974	1.0634	0.614837	Soluble pyridine nucleotide transhydrogenase
Q88KY7	753720000	528100000	5.10357e+08	4.07463e+08	3.46843e+08	4.27337e+08	PP_2152		5.19228e+08	0.0170863	0.688888	1.84979	Glycerophosphoryl diester phosphodiesterase, putative
Q88KY6	5.72773e+07	18528000	2.99883e+07	1.41183e+07	6.88367e+06	17556000	PP_2153		2.42582e+07	0.236216	0.423521	4.05695	Uncharacterized protein
Q88KY4	3.26223e+07	1.14063e+07	24643000	2.00157e+07	22821000	2.20517e+07	PP_2155		1.80247e+07	0.367182	0.552525	1.62984	Lipoprotein-releasing system ATP-binding protein LolD
Q88KY3	0	0	0	0	0	2.06877e+07	PP_2156		1e-05	0	#DIV/0!	#DIV/0!	Lipoprotein releasing system, permease protein
Q88KY1	0	0	0	0	0	2.91493e+06	PP_2158		1e-05	0	#DIV/0!	#DIV/0!	DNA-binding heavy metal response regulator
Q88KX9	1.22157e+08	9.94277e+07	123350000	144440000	1.36127e+08	1.63477e+08	PP_2160		1.11389e+08	0.107382	0.911852	0.845726	NADPH-dependent 7-cyano-7-deazaguanine reductase
Q88KX8	1132233333	7.73043e+08	1394066667	9.53917e+08	8.52987e+08	855040000	PP_2161		1.08356e+09	0.286568	0.957007	1.18693	Uncharacterized protein
Q88KX6	1.80313e+07	5.34147e+07	3.64823e+07	96961000	7.49617e+07	6.62163e+07	PP_2163		4.49485e+07	0.188353	2.4928	0.185965	VacJ lipoprotein
Q88KX5	8.15767e+06	3.59733e+06	0	0	0	0	PP_2164		1.79867e+06	1	0.220488	#DIV/0!	Uncharacterized protein
Q88KX4	166740000	5.74583e+07	4.88363e+07	0	3.59103e+07	1.55573e+07	PP_2165		5.31473e+07	0.0811141	0.318744	#DIV/0!	Response regulator
Q88KX3	137750000	9.34603e+07	7.34553e+07	93749000	9.04227e+07	80806000	PP_2166		8.34578e+07	0.119851	0.605864	1.46935	Anti-anti-sigma factor
Q88KX1	1297666667	1313700000	1989633333	1043433333	584560000	989760000	PP_2168		1.65167e+09	0.204622	1.2728	1.24365	Transaldolase
Q88KX0	3.73233e+06	0	0	0	0	0	PP_2169		1e-05	0	2.67929e-12	#DIV/0!	tRNA-dihydrouridine(20/20a) synthase
Q88KW7	27414000	3.87737e+07	3.87983e+08	50718000	23379000	1.63588e+08	PP_2172		2.13378e+08	0.818287	7.78356	0.540518	Uncharacterized protein
Q88KW4	0	0	3.82833e+06	0	0	0	PP_2175		1.91417e+06	1	#DIV/0!	#DIV/0!	3-oxoacyl-(Acyl-carrier-protein) reductase, putative
Q88KV7	175260000	3.00723e+08	2.91777e+08	8.66763e+08	666420000	842560000	PP_2182		2.9625e+08	0.0150999	1.69035	0.202201	Uncharacterized protein
Q88KV6	0	0	0	3.14363e+06	0	0	PP_2183		1e-05	0	#DIV/0!	0	Formate dehydrogenase, gamma subunit, putative
Q88KV5	0	1.67267e+07	0	0	0	0	PP_2184		8.36333e+06	1	#DIV/0!	#DIV/0!	Formate dehydrogenase, beta subunit, putative
Q88KV2	527760000	2.93283e+08	2.78297e+08	1.42023e+08	1.17993e+08	154800000	PP_2187		2.8579e+08	0.0262197	0.541515	3.71601	Universal stress protein family
Q88KV0	373380000	427420000	344980000	1.67433e+08	165360000	144890000	PP_2189		3.862e+08	0.106732	1.03433	2.23002	Uncharacterized protein
Q88KU4	50747000	7.07593e+07	3.66893e+07	0	0	0	PP_2195		5.37243e+07	0.317082	1.05867	#DIV/0!	Periplasmic polyamine-binding protein, putative
Q88KU3	6.66657e+07	6.42787e+07	3.71797e+07	0	0	12358000	PP_2196		5.07292e+07	0.267095	0.760949	#DIV/0!	Agmatinase
Q88KS6	2.72483e+08	1.31703e+08	9.34923e+07	61395000	5.09847e+07	4.90887e+07	PP_2213		1.12598e+08	0.169679	0.413228	4.4382	Acyl-CoA ligase
Q88KS5	3.22537e+07	0	6.53867e+06	0	0	0	PP_2214		3.26933e+06	1	0.101363	#DIV/0!	3-hydroxyacyl-CoA dehydrogenase FadB2x
Q88KS4	3.45353e+08	2.68587e+08	2.64347e+08	8.04463e+07	7.91363e+07	8.66317e+07	PP_2215		2.66467e+08	0.00795597	0.771577	4.29297	3-ketoacyl-CoA thiolase
Q88KS3	0	0	0	11298000	0	0	PP_2216		1e-05	0	#DIV/0!	0	Acyl-CoA dehydrogenase family protein
Q88KS2	1136066667	1602300000	9.23467e+08	8.37257e+08	770110000	6.82287e+08	PP_2217		1.26288e+09	0.268763	1.11163	1.35689	Enoyl-CoA hydratase/isomerase FadB1x
Q88KS0	12252000	4.79317e+07	3.41627e+07	245030000	3.77643e+08	200200000	PP_2220		4.10472e+07	0.167722	3.35024	0.050002	C4-type zinc finger protein, DksA/TraR family
Q88KR7	4.26637e+07	41979000	50255000	5.05567e+07	83636000	71596000	PP_2223		4.6117e+07	0.0897283	1.08094	0.843878	Uncharacterized protein
Q88KQ7	663300000	1405566667	4.01703e+08	2.09173e+08	160860000	1.45777e+08	PP_2233		9.03635e+08	0.555458	1.36233	3.17105	Hydrolase, isochorismatase family
Q88KQ2	264190000	1.79086e+08	1.26593e+08	62098000	103844000	101132000	PP_2238		1.5284e+08	0.171724	0.578521	4.2544	Peptidase, M24 family protein
Q88KP1	366940000	2.20643e+08	1.58493e+08	6.47963e+07	5.70177e+07	1.15377e+08	PP_2249		1.89568e+08	0.163925	0.516619	5.66297	Methyl-accepting chemotaxis transducer
Q88KN6	2.47173e+07	3.34147e+07	28004000	25715000	2.41943e+07	30042000	PP_2254		3.07093e+07	0.0880948	1.24242	0.961203	Transcriptional regulator, GntR family
Q88KM6	7.92177e+08	3.01067e+08	3.07753e+08	1.14577e+08	188910000	1.73543e+08	PP_2264		3.0441e+08	0.010983	0.38427	6.91394	Sugar ABC transporter, periplasmic sugar-binding protein, putative
Q88KM5	3.99497e+08	3.30837e+08	442420000	844750000	9.30737e+08	8.41097e+08	PP_2265		3.86628e+08	0.144303	0.967789	0.472917	Bifunctional protein FolD 2
Q88KL5	2.10453e+07	41430000	19136000	0	3.94913e+07	2.25683e+07	PP_2275		3.0283e+07	0.368094	1.43894	#DIV/0!	Uncharacterized protein
Q88KL3	295690000	3.29433e+08	4.08153e+08	4.39843e+08	221840000	387250000	PP_2277		3.68793e+08	0.106726	1.24723	0.672262	Uncharacterized protein
Q88KJ8	5.31687e+08	9.72973e+08	6.51773e+08	1.0553e+08	1.54433e+08	147530000	PP_2292		8.12373e+08	0.197692	1.52792	5.03827	Uncharacterized protein
Q88KJ6	0	0	0	0	0	2.13853e+07	PP_2294		1e-05	0	#DIV/0!	#DIV/0!	Uncharacterized protein
Q88KJ4	0	0	0	0	0	4581000	PP_2296		1e-05	0	#DIV/0!	#DIV/0!	Uncharacterized protein
Q88KJ2	0	0	6.38733e+07	235720000	129590000	1.45627e+08	PP_2298		3.19367e+07	1	#DIV/0!	0	Uncharacterized protein
Q88KJ1	11843333333	12272333333	15459000000	26186333333	21809666667	23170000000	PP_2299		1.38657e+10	0.114912	1.17076	0.452272	Trigger factor
Q88KJ0	2579966667	3915400000	2705366667	2365433333	3222566667	2192766667	PP_2300		3.31038e+09	0.182763	1.28311	1.0907	ATP-dependent Clp protease proteolytic subunit
Q88KI9	2328900000	3610833333	2752033333	2722333333	3526066667	2761500000	PP_2301		3.18143e+09	0.134971	1.36607	0.855479	ATP-dependent Clp protease ATP-binding subunit ClpX
Q88KI8	1551500000	2032733333	2021233333	2644566667	1820033333	2342133333	PP_2302		2.02698e+09	0.00283673	1.30647	0.586675	Lon protease
Q88KI7	9129333333	7422700000	7685166667	4363766667	6375333333	6228866667	PP_2303		7.55393e+09	0.0173728	0.827435	2.09208	DNA-binding protein HU-beta
Q88KI6	1682233333	2185300000	2243933333	3574433333	2922100000	3272866667	PP_2304		2.21462e+09	0.0132378	1.31647	0.470629	Peptidylprolyl isomerase
Q88KI5	1.59757e+08	1.53577e+08	212380000	0	1.97177e+08	7.08733e+07	PP_2305		1.82978e+08	0.160684	1.14536	#DIV/0!	Uncharacterized protein
Q88KI4	5.46257e+07	0	2.09697e+07	0	0	0	PP_2306		1.04848e+07	1	0.19194	#DIV/0!	Lipoprotein, putative
Q88KI3	420620000	1.27233e+08	2.44833e+08	97775000	9.44023e+07	1.14693e+08	PP_2307		1.86033e+08	0.316072	0.442284	4.30192	Uncharacterized protein
Q88KI2	64081000	4.34383e+07	47596000	2.37437e+07	2.27283e+07	29702000	PP_2308		4.55172e+07	0.0456714	0.710307	2.69887	Acyl-CoA thioesterase II, putative
Q88KI0	42323000	50245000	4.31887e+07	7.30827e+07	39365000	5.63843e+07	PP_2310		4.67168e+07	0.0755224	1.10382	0.579111	Methyl-accepting chemotaxis transducer
Q88KH9	3.25323e+07	0	7.44167e+06	4.73667e+06	9.81733e+06	1.02963e+07	PP_2311		3.72083e+06	1	0.114373	6.86819	Hydrolase, TatD family
Q88KH5	1.67393e+07	0	0	0	0	0	PP_2315		1e-05	0	5.97395e-13	#DIV/0!	Transcription elongation factor GreB
Q88KH2	1.51613e+07	0	0	0	0	0	PP_2318		1e-05	0	6.59573e-13	#DIV/0!	Lipase, GDSL family
Q88KH0	459950000	3.30083e+08	489940000	7.22433e+08	4.82917e+08	6.40143e+08	PP_2320		4.10012e+08	0.194942	0.891427	0.636668	Uncharacterized protein
Q88KG8	2.34463e+08	327665000	1.89223e+08	1.43543e+08	2.51203e+08	4.95303e+08	PP_2322		2.58444e+08	0.267837	1.10228	1.63341	Outer membrane lipoprotein OprI
Q88KG7	1.82093e+08	253210000	273980000	1.27587e+08	8.59917e+07	144350000	PP_2323		2.63595e+08	0.0393976	1.44758	1.42721	Conserved domain protein
Q88KG6	9.75987e+08	1027946667	8.52813e+08	1295900000	1095666667	1064066667	PP_2324		9.4038e+08	0.0931184	0.963517	0.753134	Phospho-2-dehydro-3-deoxyheptonate aldolase
Q88KG5	0	2.84927e+07	0	0	0	0	PP_2325		1.42463e+07	1	#DIV/0!	#DIV/0!	2-dehydropantoate 2-reductase
Q88KG3	5.35453e+08	361500000	342960000	2.75653e+08	2.23727e+08	228800000	PP_2327		3.5223e+08	0.026318	0.657816	1.94249	Transcriptional regulator CysB
Q88KG2	408240000	358680000	4.35283e+08	5.23593e+08	3.72507e+08	497860000	PP_2328		3.96982e+08	0.0964822	0.972422	0.779689	Phosphoadenosine phosphosulfate reductase
Q88KG0	7.56867e+07	89017000	1.27463e+08	357420000	1.25697e+08	176400000	PP_2330		1.0824e+08	0.177597	1.43011	0.211758	Uncharacterized protein
Q88KF9	2.04627e+08	1.68487e+08	2.07383e+08	2.53267e+08	1.71497e+08	2.05987e+08	PP_2331		1.87935e+08	0.103484	0.918429	0.807949	Uncharacterized protein
Q88KF8	2.92563e+07	2.48517e+07	39621000	30899000	4.00803e+07	4.60477e+07	PP_2332		3.22363e+07	0.229079	1.10186	0.946838	Uncharacterized protein
Q88KF7	0	0	0	5875000	0	0	PP_2333		1e-05	0	#DIV/0!	0	Transcriptional regulator, GntR family
Q88KF6	793700000	934640000	8.69047e+08	1177686667	1210333333	844590000	PP_2334		9.01843e+08	0.0363663	1.13625	0.673948	2-methylisocitrate lyase
Q88KF5	1220900000	1687700000	1537200000	1784633333	2241466667	1367500000	PP_2335		1.61245e+09	0.0466681	1.32071	0.684118	Citrate synthase
Q88KF4	9.77117e+08	1374133333	1005776667	1153416667	1449433333	9.97457e+08	PP_2336		1.18996e+09	0.154778	1.21782	0.84715	Aconitate hydratase, putative
Q88KF3	2.48937e+08	3.22057e+08	241220000	350750000	3.30727e+08	2.22863e+08	PP_2337		2.81638e+08	0.143511	1.13137	0.709727	Uncharacterized protein
Q88KF2	4.55077e+08	267940000	1.71553e+08	5.90773e+07	70314000	6.91013e+07	PP_2338		2.19747e+08	0.219313	0.482878	7.70307	2-methylcitrate dehydratase
Q88KF1	5372533333	6784466667	8018400000	31228000000	24762000000	27397333333	PP_2339		7.40143e+09	0.0833577	1.37764	0.172042	Aconitate hydratase B
Q88KE5	6.45637e+08	5.09427e+08	3.51557e+08	1.86107e+08	2.01883e+08	2.22027e+08	PP_2345		4.30492e+08	0.18336	0.666771	3.46918	Uncharacterized protein
Q88KE3	0	0	0	0	0	9.23967e+06	PP_2347		1e-05	0	#DIV/0!	#DIV/0!	DNA-binding response regulator
Q88KD9	8130333333	4429133333	3253200000	1.0623e+07	3.70967e+06	9294600	PP_2351		3.84117e+09	0.15307	0.472449	765.35	Acetyl-CoA synthetase, putative
Q88KD6	0	7713000	0	0	0	0	PP_2354		3.8565e+06	1	#DIV/0!	#DIV/0!	Sensory box histidine kinase/response regulator
Q88KD5	4.45397e+08	4.01503e+08	4.28683e+08	3.81353e+08	2.81573e+08	273120000	PP_2355		4.15093e+08	0.0327396	0.931963	1.16794	Response regulator
Q88KD4	106271000	7.32077e+07	7.85437e+07	7.03593e+07	55956000	62017000	PP_2356		7.58757e+07	0.0351628	0.713983	1.5104	Phytochrome family protein, putative
Q88KD1	0	0	5.59733e+06	0	0	0	PP_2359		2.79867e+06	1	#DIV/0!	#DIV/0!	Type 1 pili subunit CsuA/B protein, putative
Q88KC9	3.37863e+08	4.95057e+07	8.57487e+07	4.33143e+07	1.66393e+07	3.56283e+07	PP_2361		6.76272e+07	0.267962	0.200161	7.80027	Type 1 pili usher pathway chaperone CsuC
Q88KC6	1320433333	1709766667	1289900000	9.85583e+08	8.46077e+08	893040000	PP_2364		1.49983e+09	0.139971	1.13586	1.33975	Uncharacterized protein
Q88KC0	4.30093e+08	5.69893e+08	5.37447e+08	887420000	6.91083e+08	9.98127e+08	PP_2370		5.5367e+08	0.0293014	1.28733	0.484656	Uncharacterized protein
Q88KB9	2938633333	3391700000	3449733333	6632600000	4547966667	5876600000	PP_2371		3.42072e+09	0.00848263	1.16405	0.443059	Sulphite reductase hemoprotein, beta subunit
Q88KB5	503700000	868130000	7.77737e+08	1089960000	1000680000	1146966667	PP_2375		8.22933e+08	0.0549214	1.63378	0.462127	5-methyltetrahydrofolate--homocysteine methyltransferase
Q88KB4	66053000	1.23616e+08	79162000	6.55913e+07	1.67397e+08	6.84043e+07	PP_2376		1.01389e+08	0.219226	1.53497	1.00704	Esterified fatty acid cis/trans isomerase
Q88KB2	7.07883e+08	750790000	7.56797e+08	9.93877e+08	737470000	7.54733e+08	PP_2378		7.53793e+08	0.00398429	1.06486	0.712245	Fe/S biogenesis protein NfuA
Q88KB0	2.23177e+08	1.66507e+08	1.55523e+08	169260000	1.47823e+08	2.18393e+08	PP_2380		1.61015e+08	0.0341066	0.721469	1.31854	Uncharacterized protein
Q88KA9	0	0	0	0	0	4.42367e+06	PP_2381		1e-05	0	#DIV/0!	#DIV/0!	Conserved domain protein
Q88KA3	4.67367e+07	8.76253e+07	1.11527e+08	172150000	0	121630000	PP_2387		9.9576e+07	0.120016	2.13058	0.271488	Uncharacterized protein
Q88K95	1676700000	8.51453e+08	1154633333	525010000	3.02333e+08	5.97767e+08	PP_2396		1.00304e+09	0.15113	0.598225	3.19365	Uncharacterized protein
Q88K81	0	0	0	0	0	362200000	PP_2410		1e-05	0	#DIV/0!	#DIV/0!	Cobalt-zinc-cadmium resistance protein CzcA
Q88K70	236540000	145605000	9.77743e+07	4.63087e+07	4.69223e+07	52378000	PP_2421		1.2169e+08	0.196527	0.514457	5.1079	Acetyltransferase, GNAT family
Q88K69	6945833333	3541700000	2896433333	4.51687e+08	229060000	3.66313e+08	PP_2422		3.21907e+09	0.100226	0.463453	15.3775	Alkyl hydroperoxide reductase AhpD
Q88K66	1540766667	8.86333e+07	89890000	3.17977e+07	42341000	3.97233e+07	PP_2425		8.92617e+07	0.00703923	0.0579333	48.4553	Transcriptional regulator, AraC family
Q88K65	1751666667	2.68987e+08	2.25333e+08	2.10533e+07	2.94277e+07	2.40183e+07	PP_2426		2.4716e+08	0.0883113	0.1411	83.2017	D-isomer specific 2-hydroxyacid dehydrogenase family protein
Q88K59	8.03793e+07	3.42657e+08	135480000	2.37383e+08	2.94413e+08	178840000	PP_2432		2.39068e+08	0.4333	2.97425	0.338606	Oxygen-insensitive NAD(P)H nitroreductase
Q88K55	104399000	2.03237e+08	9.41103e+07	9.13703e+07	1.09996e+08	9.40577e+07	PP_2436		1.48674e+08	0.367	1.42409	1.14259	Transcriptional regulator, LysR family
Q88K54	0	0	14439000	0	0	0	PP_2437		7.2195e+06	1	#DIV/0!	#DIV/0!	Acyl-CoA dehydrogenase, putative
Q88K53	0	9.51243e+07	52471000	228457000	287560000	266440000	PP_2438		7.37977e+07	0.288988	#DIV/0!	0	Uncharacterized protein
Q88K52	2879033333	4078833333	3123400000	9631533333	5116900000	8178000000	PP_2439		3.60112e+09	0.132658	1.25081	0.298917	Alkyl hydroperoxide reductase, C subunit
P0A155	0	0	0	2.80243e+06	0	0	PP_2440		1e-05	0	#DIV/0!	0	Alkyl hydroperoxide reductase subunit F
Q88K50	9.95607e+08	1435300000	6.77713e+08	5.31897e+08	1011296667	522380000	PP_2442		1.05651e+09	0.358534	1.06117	1.8718	UPF0502 protein PP_2442
Q88K49	6.20623e+07	8.27277e+07	4.53547e+07	108999000	1.06907e+08	7.03563e+07	PP_2443		6.40412e+07	0.291789	1.03188	0.569384	Serine/threonine transporter SstT
Q88K44	1.16211e+08	2.01683e+08	1.02914e+08	7.50397e+07	1.43087e+08	8.68603e+07	PP_2448		1.52299e+08	0.324263	1.31054	1.54866	Uncharacterized protein
Q88K43	2.37527e+08	2.88947e+08	1.89247e+08	3.75123e+08	112070000	541970000	PP_2449		2.39097e+08	0.208493	1.00661	0.633196	Uncharacterized protein
Q88K39	369200000	1004443333	606040000	1.96307e+08	104894000	1.59157e+08	PP_2453		8.05242e+08	0.247381	2.18104	1.88073	Glutaminase-asparaginase
Q88K38	7.03897e+08	1022626667	6.82533e+08	3.18273e+08	428810000	3.17447e+08	PP_2454		8.5258e+08	0.19945	1.21123	2.21161	Ribose ABC transporter, periplasmic ribose-binding protein
Q88K36	0	0	0	0	4.30467e+06	0	PP_2456		1e-05	0	#DIV/0!	#DIV/0!	Ribose ABC transporter, permease protein
Q88K35	2.30093e+07	0	0	0	0	0	PP_2457		1e-05	0	4.34606e-13	#DIV/0!	Ribose operon repressor
Q88K34	0	0	0	0	0	6076000	PP_2458		1e-05	0	#DIV/0!	#DIV/0!	Ribokinase
Q88K32	0	0	0	0	3844000	0	PP_2460		1e-05	0	#DIV/0!	#DIV/0!	Inosine-uridine preferring nucleoside hydrolase
Q88K31	1.30172e+08	8.55257e+07	5.52463e+07	35447000	1.87863e+07	32437000	PP_2461		7.0386e+07	0.215095	0.540714	3.67231	Uncharacterized protein
Q88K30	5.56593e+07	60190000	1.45733e+08	60758000	0	1.96993e+07	PP_2462		1.02962e+08	0.415414	1.84985	0.916082	Uncharacterized protein
Q88K29	14240666667	16408666667	23104000000	22010666667	17504333333	23683333333	PP_2463		1.97563e+10	0.169448	1.38732	0.646989	Cold shock protein CspA
Q88K27	1497066667	2315066667	1965200000	2824100000	2798666667	3009833333	PP_2465		2.14013e+09	0.0817395	1.42955	0.530104	Threonine--tRNA ligase
Q88K26	2377566667	2840700000	3419933333	4176333333	3681133333	3974566667	PP_2466		3.13032e+09	0.0925199	1.31661	0.569295	Translation initiation factor IF-3
Q88K25	2279466667	3920366667	3834133333	9825833333	7438333333	7316433333	PP_2467		3.87725e+09	0.0111204	1.70095	0.231987	50S ribosomal protein L35
Q88K24	2823500000	3505400000	4266100000	6105433333	7149866667	6716633333	PP_2468		3.88575e+09	0.0978833	1.37622	0.462457	50S ribosomal protein L20
Q88K23	1086566667	1137033333	1240766667	2141100000	1653166667	1974633333	PP_2469		1.1889e+09	0.0436258	1.09418	0.507481	Phenylalanine--tRNA ligase alpha subunit
Q88K22	1542700000	1748633333	2092066667	3450666667	2559233333	2965800000	PP_2470		1.92035e+09	0.0894195	1.2448	0.447073	Phenylalanine--tRNA ligase beta subunit
P0A126	775000000	4.03947e+08	388150000	1.56207e+08	122330000	1.86687e+08	PP_2471		3.96048e+08	0.0199429	0.51103	4.96138	Integration host factor subunit alpha
Q88K21	1.27607e+08	5.24747e+07	51132000	0	0	1.67293e+07	PP_2472		5.18033e+07	0.0129593	0.405961	#DIV/0!	Uncharacterized protein
Q88K19	155500000	2.18417e+08	244710000	3.72353e+08	1.94973e+08	2.81953e+08	PP_2474		2.31563e+08	0.0567735	1.48915	0.417614	Glutathione S-transferase family protein
Q88K18	0	0	0	0	12231000	0	PP_2475		1e-05	0	#DIV/0!	#DIV/0!	Transcriptional regulator, TetR family
Q88K17	5.19917e+07	4.18533e+07	3.04087e+07	1.16656e+08	49849000	49891000	PP_2476		3.6131e+07	0.158377	0.694938	0.445685	Alcohol dehydrogenase, zinc-containing
Q88K12	0	0	0	2.02093e+08	0	0	PP_2481		1e-05	0	#DIV/0!	0	Uncharacterized protein
Q88K09	0	0	0	0	0	7.02667e+06	PP_2484		1e-05	0	#DIV/0!	#DIV/0!	Transcriptional regulator, ArsR family
Q88K07	3.15793e+07	145830000	126480000	240460000	1.15219e+08	1.3499e+08	PP_2486		1.36155e+08	0.0710587	4.31152	0.131329	NADH-dependent flavin oxidoreductase, Oye family
Q88K06	6.67473e+07	66179000	8.08543e+07	1.51913e+08	122530000	1.15804e+08	PP_2487		7.35167e+07	0.0998096	1.10142	0.439378	Aldehyde dehydrogenase family protein
Q88K05	135380000	2.91867e+08	82518000	2.25427e+08	178040000	1.58523e+08	PP_2488		1.87192e+08	0.559181	1.38272	0.60055	Succinic-semialdehyde dehydrogenase, putative
Q88K02	5.35527e+07	1.68607e+08	7.90943e+07	1.5829e+08	6.43083e+07	5.58393e+07	PP_2491		1.23851e+08	0.361373	2.31269	0.338321	ThiJ/PfpI family protein
Q88JY8	0	0	0	0	0	5.68167e+06	PP_2505		1e-05	0	#DIV/0!	#DIV/0!	GAF domain/GGDEF domain protein
Q88JX1	2.20447e+08	9.43527e+07	1.03481e+08	0	15501000	8369000	PP_2526		9.89167e+07	0.0461398	0.44871	#DIV/0!	Uncharacterized protein
Q88JW9	420590000	8.40017e+08	500110000	2.05183e+08	1.64867e+08	2.89057e+08	PP_2528		6.70063e+08	0.253638	1.59315	2.04983	O-acetylhomoserine sulfhydrylase
Q88JW1	188070000	1.92617e+08	1.64187e+08	109770000	8.57027e+07	110458000	PP_2536		1.78402e+08	0.0796797	0.948592	1.71331	Glutathione S-transferase family protein
Q88JV7	0	0	0	0	0	8389000	PP_2540		1e-05	0	#DIV/0!	#DIV/0!	Oxidoreductase, short-chain dehydrogenase/reductase family
Q88JV5	0	0	0	0	1.95577e+07	0	PP_2542		1e-05	0	#DIV/0!	#DIV/0!	Transcriptional regulator, GntR family
Q88JV4	33163000	48800000	1.55483e+08	0	0	3.66833e+06	PP_2543		1.02142e+08	0.522232	3.07999	#DIV/0!	Gamma-aminobutyrate transporter, putative
Q88JV2	2.18817e+08	175850000	1.37215e+08	59140000	7.74387e+07	7.76027e+07	PP_2545		1.56532e+08	0.12341	0.715358	3.69998	Trans-aconitate methyltransferase, putative
Q88JU7	359030000	406520000	3.22347e+08	512580000	4.84313e+08	5.30027e+08	PP_2550		3.64433e+08	0.115485	1.01505	0.700437	Probable transcriptional regulatory protein PP_2550
Q88JU3	76111000	3.88323e+07	3.90367e+07	0	2.94207e+07	0	PP_2554		3.89345e+07	0.00262407	0.511549	#DIV/0!	4-hydroxyphenylpyruvate dioxygenase, putative
Q88JT4	0	0	2.52657e+06	0	0	0	PP_2563		1.26328e+06	1	#DIV/0!	#DIV/0!	Antibiotic biosynthesis protein, putative
Q88JT1	4.98637e+07	6.61687e+07	54180000	1.10864e+08	103723000	110154000	PP_2566		6.01743e+07	0.0996161	1.20678	0.449775	Leucine-rich repeat domain protein
Q88JS8	1.74877e+08	3.96287e+07	6.70247e+07	5.56813e+07	5.05187e+07	51057000	PP_2569		5.33267e+07	0.25687	0.304938	3.14068	Metabolite MFS transporter, MHS family
Q88JS2	1.79927e+07	2.07043e+06	2.19333e+06	0	0	0	PP_2577		2.13188e+06	0.0288243	0.118486	#DIV/0!	PqiB family protein
Q88JR6	0	0	0	0	0	3.08057e+07	PP_2583		1e-05	0	#DIV/0!	#DIV/0!	Acetyltransferase, GNAT family
Q88JR1	7.65633e+07	56549000	58851000	0	1.52347e+07	1.54637e+07	PP_2588		5.77e+07	0.019948	0.753624	#DIV/0!	Aminotransferase, class III
Q88JR0	0	17885000	0	0	0	0	PP_2589		8.9425e+06	1	#DIV/0!	#DIV/0!	Aldehyde dehydrogenase family protein
Q88JP8	0	0	0	0	0	6389000	PP_2601		1e-05	0	#DIV/0!	#DIV/0!	Transcriptional regulator, IclR family
Q88JK6	0	0	0	1.29259e+08	1.87967e+08	71480000	PP_2643		1e-05	0	#DIV/0!	0	Methyl-accepting chemotaxis transducer
Q88JJ3	0	0	7.70567e+06	0	0	0	PP_2656		3.85283e+06	1	#DIV/0!	#DIV/0!	Phosphate-binding protein PstS
Q88JI7	1268103333	1031616667	4.11237e+08	2878433333	4.64397e+08	2.08197e+08	PP_2662		7.21427e+08	0.429967	0.568902	0.440553	Uncharacterized protein
Q88JI6	2178866667	1000253333	6.60417e+08	6.53297e+08	4.26317e+08	4.18537e+08	PP_2663		8.30335e+08	0.204638	0.381086	3.33519	Uncharacterized protein
Q88JI5	3909566667	2154966667	1267400000	1225566667	8.85253e+08	8.19047e+08	PP_2664		1.71118e+09	0.259343	0.437691	3.19001	Sensory box histidine kinase/response regulator
Q88JI4	1749566667	7.76373e+08	977300000	3.06327e+08	3.87497e+08	398630000	PP_2665		8.76837e+08	0.114575	0.501174	5.71144	DNA-binding response regulator AgmR
Q88JI3	572610000	484330000	4.30153e+08	2.08003e+08	2.17317e+08	2.32937e+08	PP_2666		4.57242e+08	0.0592429	0.798522	2.75289	Uncharacterized protein
Q88JI1	648900000	6.44327e+08	525540000	383600000	306840000	3.83943e+08	PP_2668		5.84933e+08	0.101539	0.901423	1.69161	ABC efflux transporter, ATP-binding protein
Q88JI0	2695400000	1303866667	1221600000	9.04043e+08	752520000	7.74267e+08	PP_2669		1.26273e+09	0.0325748	0.468477	2.98149	Outer membrane protein, putative
Q88JH7	1.31632e+08	103634000	9.44237e+07	115370000	1.03771e+08	1.17493e+08	PP_2672		9.90288e+07	0.0465033	0.752314	1.14096	DNA-binding response regulator, LuxR family
Q88JH6	22089333333	11514000000	13147000000	7111266667	3314366667	6470100000	PP_2673		1.23305e+10	0.0662179	0.558211	3.10624	Pentapeptide repeat family protein
Q88JH5	135333000000	74788000000	87486000000	46587000000	25760000000	41785000000	PP_2674		8.1137e+10	0.0782504	0.599536	2.90495	Quinoprotein ethanol dehydrogenase
Q88JH4	18715333333	6914100000	10696933333	7359900000	3738766667	5600633333	PP_2675		8.80552e+09	0.214799	0.470497	2.54288	Cytochrome c-type protein
Q88JH3	1801433333	6.72193e+08	8.95817e+08	6.14217e+08	2.80687e+08	534510000	PP_2676		7.84005e+08	0.142616	0.435212	2.9329	Periplasmic binding protein, putative
Q88JH2	1508666667	593120000	691370000	5.48117e+08	2.64507e+08	4.68043e+08	PP_2677		6.42245e+08	0.0764895	0.425704	2.75246	Uncharacterized protein
Q88JH1	1474866667	5.96093e+08	6.13247e+08	557880000	183790000	413410000	PP_2678		6.0467e+08	0.014184	0.409983	2.6437	Hydrolase, putative
Q88JH0	7970366667	15216333333	7277600000	8873266667	9813433333	8642700000	PP_2679		1.1247e+10	0.352928	1.4111	0.898245	Quinoprotein ethanol dehydrogenase, putative
Q88JG9	88986333333	71567000000	59372000000	43394666667	38859666667	34830666667	PP_2680		6.54695e+10	0.093135	0.735725	2.05063	Aldehyde dehydrogenase family protein
Q88JG7	46699000	31468000	1.09073e+07	0	0	0	PP_2682		2.11877e+07	0.485204	0.453707	#DIV/0!	Alcohol dehydrogenase, iron-containing
Q88JG6	4.96357e+08	2.53713e+08	2.09133e+08	8.35777e+07	7.59727e+07	71276000	PP_2683		2.31423e+08	0.096317	0.466244	5.93887	Sensory box histidine kinase/response regulator
Q88JE8	0	0	0	0	0	6.32033e+06	PP_2701		1e-05	0	#DIV/0!	#DIV/0!	Transcriptional regulator, LysR family
Q88JD6	2.50997e+08	0	0	0	0	0	PP_2713		1e-05	0	3.98412e-14	#DIV/0!	DNA-binding response regulator
Q88JD5	1.60863e+08	0	0	0	0	0	PP_2714		1e-05	0	6.21646e-14	#DIV/0!	Sensor histidine kinase
Q88JB5	0	0	0	2.33313e+07	0	0	PP_2734		1e-05	0	#DIV/0!	0	Cyclopropane-fatty-acyl-phospholipid synthase
Q88JB0	2.30397e+07	0	0	0	0	0	PP_2739		1e-05	0	4.34034e-13	#DIV/0!	Sensory box protein, putative
Q88J43	72045000	1.12183e+08	7.70007e+07	1.04681e+08	93517000	8.83837e+07	PP_2806		9.4592e+07	0.185971	1.31296	0.688236	Transcriptional regulator, TetR family
Q88J22	5.22433e+07	8.28933e+07	1.09067e+08	1.68937e+08	1.13097e+08	0	PP_2827		9.598e+07	0.136348	1.83717	0.309248	Alcohol dehydrogenase, zinc-containing
Q88J00	0	0	0	0	1.14607e+07	0	PP_2849		1e-05	0	#DIV/0!	#DIV/0!	Urease accessory protein UreG
Q88IZ6	3.80437e+08	1.08836e+08	119679000	4.77093e+07	6.99583e+07	0	PP_2853		1.14257e+08	0.0474514	0.300332	7.97405	Uncharacterized protein
Q88IY8	3.84957e+08	225220000	1.46477e+08	93509000	1.1471e+08	1.60663e+08	PP_2861		1.85848e+08	0.211848	0.482777	4.11679	Methyl-accepting chemotaxis transducer
Q88IY2	285150000	3.73917e+08	201100000	147420000	1.17295e+08	105197000	PP_2867		2.87508e+08	0.300542	1.00827	1.93427	Pyridine nucleotide-disulphide oxidoreductase family protein
Q88IX4	77385000	87069000	62901000	0	0	0	PP_2875		7.4985e+07	0.161152	0.968986	#DIV/0!	Uncharacterized protein
Q88IX3	1.13245e+08	1.30647e+08	9.66657e+07	1.06768e+08	132130000	1.12615e+08	PP_2876		1.13656e+08	0.14949	1.00363	1.06066	Beta-lactamase
Q88IW8	3.26637e+07	243788000	4.65257e+07	0	3.44517e+07	0	PP_2881		1.45157e+08	0.67948	4.44398	#DIV/0!	Oxidoreductase, short chain dehydrogenase/reductase family
Q88IV9	1.67953e+08	287650000	131840000	1.94927e+08	1.90077e+08	143740000	PP_2890		2.09745e+08	0.371427	1.24883	0.861623	Exodeoxyribonuclease III
Q88IU6	4043500000	3305766667	4534933333	3277600000	3409633333	4019433333	PP_2903		3.92035e+09	0.156767	0.969544	1.23368	Peptidyl-prolyl cis-trans isomerase
Q88IU5	1263866667	1353600000	1475200000	2504900000	1878666667	2231566667	PP_2904		1.4144e+09	0.0429864	1.11911	0.504558	Glutamine--tRNA ligase
Q88IU4	9.12263e+08	8.33807e+08	842090000	1418166667	1054066667	1171100000	PP_2905		8.37948e+08	0.00494263	0.918538	0.643269	Cysteine--tRNA ligase
Q88IU1	0	0	0	0	8.23367e+06	0	PP_2908		1e-05	0	#DIV/0!	#DIV/0!	Transcriptional regulator, putative
Q88IT7	0	0	0	11923000	0	0	PP_2912		1e-05	0	#DIV/0!	0	RIO1/ZK632.3/MJ0444 family protein
Q88IT6	1259633333	1133603333	6.95077e+08	5.90253e+08	8.79243e+08	6.54243e+08	PP_2913		9.1434e+08	0.239805	0.725878	2.13406	Delta-aminolevulinic acid dehydratase
Q88IS4	4.44083e+08	79616000	1.54573e+08	7.87443e+07	8.94123e+07	6.08553e+07	PP_2925		1.17095e+08	0.320072	0.263677	5.63956	Probable malate:quinone oxidoreductase 3
Q88IS1	421400000	1627766667	1199300000	3246733333	4561833333	2742733333	PP_2928		1.41353e+09	0.151559	3.35437	0.129792	Uncharacterized protein
Q88IS0	260620000	657020000	4.09783e+08	1098710000	1274333333	9.13827e+08	PP_2929		5.33402e+08	0.231755	2.04666	0.237205	Carboxynorspermidine/carboxyspermidine decarboxylase
Q88IR7	3.23393e+08	2.89003e+08	3.17593e+08	290880000	176470000	2.64457e+08	PP_2932		3.03298e+08	0.0471318	0.937862	1.11178	Amidase family protein
Q88IR6	3.69763e+08	4.80403e+08	243070000	2.10763e+08	208430000	1.51943e+08	PP_2933		3.61737e+08	0.328047	0.978292	1.7544	Glutathione S-transferase family protein
Q88IR3	36050000	4.53343e+07	79564000	1.38113e+08	1.61483e+08	1.49257e+08	PP_2936		6.24492e+07	0.27406	1.73229	0.261018	ABC transporter, ATP-binding protein
Q88IR1	0	0	10210000	0	0	0	PP_2938		5.105e+06	1	#DIV/0!	#DIV/0!	Uncharacterized protein
Q88IR0	0	0	0	0	0	10912000	PP_2939		1e-05	0	#DIV/0!	#DIV/0!	Uncharacterized protein
Q88IQ7	8.19023e+07	0	3.63213e+07	0	0	4.27963e+07	PP_2942		1.81607e+07	1	0.221736	#DIV/0!	Response regulator
Q88IQ4	97022000	0	2.85813e+07	0	0	0	PP_2945		1.42907e+07	1	0.147293	#DIV/0!	Sensor histidine kinase/response regulator
Q88IQ2	2353866667	1616833333	1619833333	899560000	891440000	9.20473e+08	PP_2947		1.61833e+09	0.00092688	0.687521	2.61669	Transcriptional regulator MvaT, P16 subunit, putative
Q88IP9	1.16663e+08	1.69383e+08	1.54333e+08	1.07284e+08	1.52153e+08	1.33143e+08	PP_2950		1.61858e+08	0.0464913	1.3874	1.08743	Uncharacterized protein
Q88IP0	0	0	0	3.26617e+06	0	0	PP_2959		1e-05	0	#DIV/0!	0	Alkyl hydroperoxide reductase AhpD
Q88IL2	0	0	1.46477e+07	0	0	0	PP_2987		7.32383e+06	1	#DIV/0!	#DIV/0!	Uncharacterized protein
Q88IJ2	0	17909000	0	0	0	0	PP_3007		8.9545e+06	1	#DIV/0!	#DIV/0!	Uncharacterized protein
Q88IJ1	1.13997e+08	3.67267e+07	0	0	0	0	PP_3008		1.83633e+07	1	0.161087	#DIV/0!	Uncharacterized protein
Q88II5	0	0	0	0	0	1.77043e+07	PP_3014		1e-05	0	#DIV/0!	#DIV/0!	Uncharacterized protein
Q88II0	1.58047e+08	2.50513e+08	1.34501e+08	59827000	6.83263e+07	55251000	PP_3019		1.92507e+08	0.301321	1.21804	2.64173	Carbon-nitrogen hydrolase family protein
Q88IH5	168410000	4.86803e+08	1.77667e+08	360910000	5.10013e+08	3.43157e+08	PP_3024		3.32235e+08	0.465238	1.97277	0.466626	Uncharacterized protein
Q88ID2	0	0	1.06177e+07	0	0	0	PP_3067		5.30883e+06	1	#DIV/0!	#DIV/0!	Uncharacterized protein
Q88IC9	0	0	0	0	0	1160600	PP_3070		1e-05	0	#DIV/0!	#DIV/0!	Peptidylprolyl isomerase
Q88IC8	2103833333	123230000	4.08167e+08	106720000	78806000	107740000	PP_3071		2.65698e+08	0.536203	0.126292	19.7136	Acetoacetyl-CoA synthetase, putative
Q88IC7	2775633333	794170000	1025443333	5.51187e+08	5.49227e+08	648340000	PP_3072		9.09807e+08	0.1271	0.327783	5.03574	Ecotin
Q88IC6	4900500000	523840000	7.50507e+08	1.69013e+07	2.92113e+07	17619000	PP_3073		6.37173e+08	0.177869	0.130022	289.948	3-hydroxybutyrate dehydrogenase
Q88IC0	8.89223e+08	1859633333	1298066667	2295933333	1960766667	2255700000	PP_3079		1.57885e+09	0.17784	1.77554	0.387304	Peptidyl-prolyl cis-trans isomerase C
Q88IB9	0	2.09837e+08	125020000	2.39943e+08	3.59753e+08	2.30553e+08	PP_3080		1.67428e+08	0.253292	#DIV/0!	0	Phospho-2-dehydro-3-deoxyheptonate aldolase
Q88IB8	0	0	0	0	0	3466000	PP_3081		1e-05	0	#DIV/0!	#DIV/0!	Uncharacterized protein
Q88IB2	0	0	0	0	0	10899000	PP_3087		1e-05	0	#DIV/0!	#DIV/0!	Excinuclease ABC, A subunit, putative
Q88IB1	48908000	8.44707e+07	659510000	182280000	7.99397e+07	4.41323e+08	PP_3088		3.7199e+08	0.772922	7.60592	0.268312	Uncharacterized protein
Q88IB0	1075806667	1525000000	1109313333	1422233333	1415966667	1406933333	PP_3089		1.31716e+09	0.157797	1.22434	0.756421	Uncharacterized protein
Q88IA9	6.32017e+07	1.37397e+08	888650000	3.53757e+08	1.14587e+08	5.67423e+08	PP_3090		5.13023e+08	0.732182	8.11724	0.178659	OmpA domain protein
Q88IA8	4.33423e+08	572290000	3194533333	1330433333	3.75923e+08	1908633333	PP_3091		1.88341e+09	0.696142	4.34543	0.325776	Uncharacterized protein
Q88IA7	1.04385e+08	1.39573e+08	8.98637e+08	1.52177e+08	1.02119e+08	2.28177e+08	PP_3092		5.19105e+08	0.731127	4.97297	0.685948	Uncharacterized protein
Q88IA6	8.09577e+07	1.73053e+08	1021096667	3.67387e+08	1.98053e+08	6.05823e+08	PP_3093		5.97075e+08	0.710165	7.37515	0.220361	Uncharacterized protein
Q88IA5	4.15517e+07	1.05748e+08	611460000	2.27203e+08	8.43527e+07	3.28727e+08	PP_3094		3.58604e+08	0.705113	8.63031	0.182883	Uncharacterized protein
Q88IA4	362190000	1006576667	4607233333	1746366667	6.35667e+08	2643533333	PP_3095		2.80691e+09	0.641393	7.74981	0.207396	Chaperone-associated ATPase, putative
Q88IA2	0	5.37573e+07	5.06967e+08	1.07599e+08	36936000	1.92432e+08	PP_3097		2.80362e+08	0.808257	#DIV/0!	0	Uncharacterized protein
Q88IA0	7.65243e+08	1251766667	3825666667	2041666667	1403366667	3060033333	PP_3099		2.53872e+09	0.506929	3.31753	0.374813	Uncharacterized protein
Q88I99	6.16227e+07	142220000	8.91947e+08	1.98463e+08	1.60803e+08	543200000	PP_3100		5.17083e+08	0.724957	8.39112	0.310499	Uncharacterized protein
Q88I95	9.84187e+07	2.23923e+08	1.231e+08	6.27283e+07	106055000	58916000	PP_3104		1.73512e+08	0.290536	1.763	1.56897	Uncharacterized protein
Q88I93	8.08797e+08	1781033333	1703800000	9.22737e+08	1013886667	623340000	PP_3106		1.74242e+09	0.0221627	2.15433	0.876519	Uncharacterized protein
Q88I92	101666000	2.73463e+08	3.72333e+08	3.08413e+08	2.50227e+08	267170000	PP_3107		3.22898e+08	0.153098	3.17607	0.329642	Uncharacterized protein
Q88I91	384300000	9.78637e+08	1081766667	4.51143e+08	4.51407e+08	542540000	PP_3108		1.0302e+09	0.0500533	2.68072	0.851836	Rhs-related protein
Q88I81	8.34243e+07	170330000	1.65333e+08	9.31997e+07	1.02183e+08	111155000	PP_3120		1.67832e+08	0.0148859	2.01178	0.895114	Oxidoreductase, aldo/keto reductase family
Q88I79	13565000000	1586300000	2681800000	283730000	2.33613e+07	130930000	PP_3122		2.13405e+09	0.256672	0.15732	47.8095	CoA-transferase, subunit A, putative
Q88I78	11181466667	1708466667	2779533333	8.27283e+07	1.95967e+07	55061000	PP_3123		2.244e+09	0.238651	0.200689	135.159	CoA-transferase, subunit B, putative
Q88I77	1.26693e+08	4.46883e+07	54058000	0	0	0	PP_3124		4.93732e+07	0.0948862	0.389708	#DIV/0!	Transporter, short-chain fatty acid transporter family
Q88I76	13453000	0	0	0	0	0	PP_3125		1e-05	0	7.43329e-13	#DIV/0!	Transcriptional regulator, Cro/CI family
Q88I75	778720000	1.26048e+08	250810000	72104000	7.14677e+07	8.65847e+07	PP_3126		1.88429e+08	0.33106	0.241973	10.8	Polysaccharide export protein, putative
Q88I74	1161466667	394790000	3.92197e+08	1.62857e+08	9.15413e+07	1.46773e+08	PP_3127		3.93493e+08	0.00329527	0.33879	7.13183	Exopolysaccharide transport protein, putative
Q88I73	489570000	1.77027e+08	2.29973e+08	69528000	42882000	7.03307e+07	PP_3128		2.035e+08	0.13009	0.415671	7.04134	Exopolysaccharide biosynthesis/transport protein, putative
Q88I71	1.22533e+08	2.36853e+07	1.79303e+07	2.13513e+07	0	1.29003e+07	PP_3130		2.08078e+07	0.138289	0.169814	5.73891	Uncharacterized protein
Q88I70	0	4.70933e+06	0	0	0	0	PP_3131		2.35467e+06	1	#DIV/0!	#DIV/0!	Uncharacterized protein
Q88I67	8.14847e+07	1.68877e+07	2.84003e+07	2.90343e+07	1.16253e+07	12266000	PP_3134		2.2644e+07	0.25421	0.277893	2.80649	Conserved domain protein
Q88I66	5.96263e+08	189520000	120120000	7.63103e+07	35028000	8.77073e+07	PP_3135		1.5482e+08	0.224131	0.25965	7.81366	Glycosyl transferase, putative
Q88I63	5.75927e+07	0	0	0	0	0	PP_3138		1e-05	0	1.73633e-13	#DIV/0!	VirK domain protein
Q88I62	1842666667	809130000	4.68937e+08	1.11312e+08	1.47717e+08	1.61023e+08	PP_3139		6.39033e+08	0.266178	0.346798	16.5541	Glycosyl transferase, group 1 family protein
Q88I61	142010000	0	0	0	0	0	PP_3140		1e-05	0	7.04176e-14	#DIV/0!	Glycosyl transferase, group 2 family protein
Q88I60	1.24733e+06	0	0	0	0	0	PP_3141		1e-05	0	8.0171e-12	#DIV/0!	Glycosyl transferase, WecB/TagA/CpsF family
Q88I56	2433700000	1533833333	1353866667	5.29873e+08	4.48423e+08	4.89227e+08	PP_3145		1.44385e+09	0.0623218	0.593274	4.59298	Uncharacterized protein
Q88I55	0	4.96233e+07	0	54930000	0	1.30222e+08	PP_3146		2.48117e+07	1	#DIV/0!	0	Oxidoreductase, putative
Q88I50	4.15067e+07	2.81823e+08	239300000	2.99087e+07	13934000	3.59597e+07	PP_3151		2.60562e+08	0.0815994	6.27759	1.38778	Aldehyde dehydrogenase family protein
Q88I44	8.62097e+07	4.60207e+07	70217000	8.92513e+07	86339000	90000000	PP_3157		5.81188e+07	0.208163	0.674157	0.96592	Inositol monophosphatase family protein
Q88I17	0	88498000	4.18697e+07	155470000	1.02312e+08	7.15547e+07	PP_3185		6.51838e+07	0.357668	#DIV/0!	0	Aminopyrimidine aminohydrolase
Q88I16	2.09613e+08	321610000	3.08127e+08	3.44483e+08	2.89613e+08	326970000	PP_3186		3.14868e+08	0.0214111	1.50214	0.608486	Transcriptional activator, putative
Q88I13	3.46723e+08	4.83403e+08	4.41913e+08	3.90383e+08	344950000	4.70567e+08	PP_3189		4.62658e+08	0.0448387	1.33437	0.888161	Cytosine deaminase
Q88I10	0	0	9494000	0	0	0	PP_3192		4.747e+06	1	#DIV/0!	#DIV/0!	Uncharacterized protein
Q88HZ8	0	0	0	0	0	2.07247e+07	PP_3204		1e-05	0	#DIV/0!	#DIV/0!	Uncharacterized protein
Q88HX6	0	0	0	0	0	21301000	PP_3227		1e-05	0	#DIV/0!	#DIV/0!	Transcriptional regulator, LysR family
Q88HW2	1.94157e+08	5.78633e+07	4.09667e+08	4.35413e+07	7.37223e+07	64334000	PP_3241		2.33765e+08	0.752472	1.204	4.45913	Uncharacterized protein
Q88HV5	1.84483e+08	3.93657e+08	206070000	412940000	5.85857e+08	3.96397e+08	PP_3248		2.99863e+08	0.312787	1.62542	0.446756	Dyp-type peroxidase family protein
Q88HV4	0	0	1.18033e+07	0	0	0	PP_3249		5.90167e+06	1	#DIV/0!	#DIV/0!	Oxidoreductase, putative
Q88HU9	0	3.42833e+07	0	2.65323e+07	0	24272000	PP_3254		1.71417e+07	1	#DIV/0!	0	Nucleosidase, putative
Q88HR7	0	0	0	0	3914000	0	PP_3286		1e-05	0	#DIV/0!	#DIV/0!	Phenylacetic acid degradation transcriptional repressor
Q88HQ3	0	0	0	0	0	7.73433e+06	PP_3300		1e-05	0	#DIV/0!	#DIV/0!	Transcriptional regulator, tetR family
Q88HJ8	0	1.79993e+07	0	0	0	0	PP_3358		8.99967e+06	1	#DIV/0!	#DIV/0!	Enoyl-CoA hydratase/aldolase
Q88HJ2	1.87897e+08	2.14607e+08	6.10197e+07	4.10023e+07	4.70317e+07	4.50857e+07	PP_3364		1.37813e+08	0.557229	0.733452	4.58258	Response regulator
Q88HJ0	8.79827e+07	88475000	7.32573e+07	8.34197e+07	8.42683e+07	7.17953e+07	PP_3367		8.08662e+07	0.0940917	0.919115	1.0547	Uncharacterized protein
Q88HI1	2.77503e+07	1.95593e+07	3.63307e+07	6802933333	9192566667	7024933333	PP_3376		2.7945e+07	0.300078	1.00701	0.00407917	2-ketogluconate 6-phosphate reductase
Q88HI0	0	0	0	0	0	46620000	PP_3377		1e-05	0	#DIV/0!	#DIV/0!	2-ketogluconate transporter, putative
Q88HH9	8785000	4.85463e+06	10543800	2201900000	2770066667	2891233333	PP_3378		7.69922e+06	0.369464	0.876405	0.00398974	2-ketogluconate kinase
Q88HH8	2456800	0	0	1811533333	2095800000	1715666667	PP_3379		1e-05	0	4.07034e-12	0.0013562	Epimerase KguE, putative
Q88HH7	147720000	2.28593e+08	156270000	1220233333	1091553333	1021256667	PP_3380		1.92432e+08	0.18792	1.30268	0.121059	Transcriptional regulator PtxS
Q88HH6	1.21947e+07	0	2.07243e+07	4.95653e+08	6.14707e+08	4.73207e+08	PP_3382		1.03622e+07	1	0.849729	0.0246032	Gluconate dehydrogenase cytochrome c subunit, putative
Q88HH5	2.62247e+07	0	2.08097e+07	1605100000	2045800000	1206400000	PP_3383		1.04048e+07	1	0.396758	0.0163383	Gluconate dehydrogenase, putative
Q88HH4	28427000	52497000	1.70763e+07	7.80197e+08	8.78933e+08	619460000	PP_3384		3.47867e+07	0.509113	1.22372	0.0364357	Uncharacterized protein
Q88HF3	14284000	8.50117e+07	37396000	30762000	9.47163e+07	4.70823e+07	PP_3406		6.12038e+07	0.388993	4.28478	0.464339	Acetyltransferase, GNAT family
Q88HE9	0	0	0	0	0	1.37663e+07	PP_3411		1e-05	0	#DIV/0!	#DIV/0!	Uncharacterized protein
Q88HE6	2.80097e+06	0	0	0	0	0	PP_3414		1e-05	0	3.5702e-12	#DIV/0!	Methyl-accepting chemotaxis transducer/sensory box protein
Q88HE5	33275000	4.38667e+07	4.32173e+07	1.95137e+08	1.13164e+08	1.68167e+08	PP_3415		4.3542e+07	0.0074564	1.30855	0.170522	Transcriptional regulator, LacI family
Q88HE4	1.85373e+07	0	43583000	1895266667	1353766667	1392933333	PP_3416		2.17915e+07	1	1.17555	0.00978086	Gluconokinase
Q88HC9	9.87847e+08	219720000	1.93527e+08	1.46177e+07	1.40663e+07	5.06227e+07	PP_3431		2.06623e+08	0.0633843	0.209165	67.579	ThiJ/PfpI family protein
Q88HC7	3.57123e+08	1.47823e+08	3.00207e+08	2.88633e+08	2.05707e+08	2.36487e+08	PP_3433		2.24015e+08	0.340119	0.627276	1.23729	4-hydroxyphenylpyruvate dioxygenase
Q88HC5	4.60123e+07	2.38157e+07	0	0	0	5.33067e+06	PP_3435		1.19078e+07	1	0.258797	#DIV/0!	Uncharacterized protein
Q88HC0	2.62277e+07	0	7619000	0	0	0	PP_3440		3.8095e+06	1	0.145247	#DIV/0!	Uncharacterized protein
Q88HB9	576780000	1.45647e+08	6.56503e+07	5.86533e+06	1.65623e+07	7626000	PP_3441		1.05649e+08	0.378597	0.183169	98.3371	Uncharacterized protein
Q88HB7	3.87767e+08	6.94113e+08	295000000	9.01973e+08	1150366667	7.73013e+08	PP_3443		4.94557e+08	0.403506	1.2754	0.429909	Glyceraldehyde-3-phosphate dehydrogenase, putative
Q88HB6	2.57767e+08	0	9.15847e+07	0	0	0	PP_3444		4.57923e+07	1	0.17765	#DIV/0!	Glyoxalase family protein
Q88HB5	1.20803e+07	0	0	0	0	0	PP_3445		1e-05	0	8.27792e-13	#DIV/0!	Uncharacterized protein
Q88HB4	2.31233e+07	1.30743e+07	13796000	2.24947e+08	41855000	83790000	PP_3446		1.34352e+07	0.0268574	0.581022	0.102795	L-threonine dehydratase
Q88HB2	0	4.99367e+06	0	0	0	0	PP_3448		2.49683e+06	1	#DIV/0!	#DIV/0!	Bacteriophage receptor protein, putative
Q88HA3	0	2.10773e+07	0	0	0	0	PP_3457		1.05387e+07	1	#DIV/0!	#DIV/0!	Molybdenum cofactor guanylyltransferase
Q88HA1	4.58957e+07	2.07347e+07	0	0	0	0	PP_3459		1.03673e+07	1	0.225889	#DIV/0!	Uncharacterized protein
Q88H94	5.61397e+07	8.78467e+07	4.92333e+06	5.65833e+06	3.56167e+07	0	PP_3466		4.6385e+07	0.893859	0.826243	9.92159	ABC efflux transporter, permease/ATP-binding protein, putative
Q88H70	7952100000	4728000000	4325900000	1748866667	9.10143e+08	1312266667	PP_3491		4.52695e+09	0.0444118	0.569277	4.547	Enoly-coenzyme A hydratase/isomerase family protein
Q88H69	10017466667	7219833333	6447300000	3695733333	1468333333	2515433333	PP_3492		6.83357e+09	0.0565249	0.682165	2.71055	Acyl-CoA dehydrogenase
Q88H65	367230000	481610000	3.07187e+08	3.86277e+08	502950000	315460000	PP_3496		3.94398e+08	0.221126	1.07398	0.950692	Uncharacterized protein
Q88H64	5.47503e+07	9.50977e+07	9.37577e+07	358410000	2.57213e+08	2.96853e+08	PP_3497		9.44277e+07	0.00709538	1.7247	0.152759	Peptidase, U32 family
Q88H61	0	0	0	2.76187e+07	0	0	PP_3504		1e-05	0	#DIV/0!	0	Uncharacterized protein
Q88H57	1.44013e+08	4.94267e+08	251720000	6.08747e+08	590830000	4.57857e+08	PP_3508		3.72993e+08	0.325135	2.58999	0.236574	Cobalamin biosynthesis protein CobW
Q88H56	1.12215e+08	1.37307e+08	97982000	142290000	1.25017e+08	1.35533e+08	PP_3509		1.17644e+08	0.167134	1.04839	0.788634	Glyoxalase family protein
Q88H54	14035333333	9945433333	9107233333	6663966667	7055800000	5562033333	PP_3511		9.52633e+09	0.0439938	0.678739	2.10615	Branched-chain-amino-acid aminotransferase
Q88H48	1576400	0	0	0	0	0	PP_3517		1e-05	0	6.34357e-12	#DIV/0!	Uncharacterized protein
[truncated: 792 more rows]
